# Supplementary material for: Mutational Landscape of Aggressive Cutaneous Squamous Cell Carcinoma
Source: Oxford University Press journal article supplement (doi:10.1158/1078-0432.ccr-14-1768), 2014-10-11
Supplement: 10780432ccr141768-sup-134467_1_supp_2671247_ncbwmv.xlsx [file 10780432ccr141768-sup-134467_1_supp_2671247_ncbwmv.xlsx]

## Sheet: Table S1
Supplemental Table S1: Summary of Patient Characteristics
	Variable	No. of patients (%)
	Patient features
	Age
	≤65 y	16 (41.0)
	>65y	23 (59.0)
	Gender
	Male	36 (92.3)
	Female	3 ( 7.7)
	Immunosupression
	Yes	1 ( 2.5)
	No	38 (97.2)
	Primary tumor features
	Site
	Ear or lip	8 (20.5)
	Preauricular	8 (20.5)
	Scalp	6 (15.4)
	Periorbital	6 (15.4)
	Cheek	4 (10.5)
	Other head and neck	7 (18.0)
	Tumor size
	≥ 4 cm	12 (30.7)
	< 4 cm	24 (61.5)
	Unknown	3 ( 7.7)
	Invasion depth
	Beyond s.c. tissue	28 (71.8)
	Within s.c. tissue	11 (28.2)
	Perineural invasion
	Present	19 (48.7)
	Absent	20 (51.3)
	Differentiation
	Well-moderate	22 (56.4)
	Poor	17 (43.6)
	Disease status
	Untreated	14 (35.9)
	Recurrent	15 (38.5)
	Persistent	10 (25.6)
	Nodal features
	Parotid	1 ( 2.5)
	Neck	4 (10.3)
	Parotid and Neck	3 ( 7.7)
	Metastatic Features
	Parotid	4 (10.3)
	Dermal	2 ( 5.1)
	Orbit	1 ( 2.6)
	AJCC staging
	Stage I	1 ( 2.6)
	Stage II	11 (28.2)
	Stage III	3 ( 7.7)
	Stage IV	6 (15.4)
	Not applicable	18 (46.1)

## Sheet: Table S2
Supplemental Table S2: Patient Characteristics and Key Mutations
SampleID	Age at diagnosis (yrs)	Gender	Immonsuppression	Primary site	Type of lesion studied	Histologic subtype	Differentiation	Disease status at presentation	T-stage	N-stage	M-stage	AJCC stage	T size (cm)	Tumor ≥ 4 cm	Clark level	Depth of invasion (mm)	PNI	Invade > subcutaneous tissue	Invade parotid	Parotid LN	Invade bone	Invade skull base	Reg LN+	Site of metastasis	Prior treatment	Multiple HN cSCC	# of previous local recurrences	# of previous distant recurrences	Regional or distant mets present	Disease recurrence or persistence	Other skin tumors	Other cancers at presentation	Type other cancers	Interval from previous lesion to tumor studied (months)	Interval from index lesion to present lesion (months)	Treatment for tumor studied	Persistant disease tumor studied	Recurrent disease tumor studied	Patient status	Event status recurrent free survival	Recurrent free survival time (months)	Event status time to recurrence	Recurrent free interval (months)	Survival interval for OS (months)	Subsequent cancers	Total mutations	A>C	A>G	A>T
CSCC-1-T	60	M	no	nose	Primary	none	moderate	untreated	T1	0	0	1	0.7	no	5	7.9	no	yes	no	no	no	no	absent		none	no	0	0	no	no	no	no		NA	NA	surgery	no	no	deceased	event	130.6	censored	33.9	131		257	0.0122951	0.0983607	0.0778689
CSCC-2-T	72	M	no	nose	Primary	none	poor	recurrent	rT2	0	0	NA	1	no	5	5.7	no	yes	no	no	no	no	absent		surgery +XRT	no	2	0	no	yes	no	no		5	10.6521	surgery + chemo	yes	NA	deceased	NA	NA	NA	NA	5		287	0.0253623	0.0978261	0.0471014
CSCC-4-T	83	M	no	preauricular	Metastasis	adenosquamous	poor	persistent	Tx	1	1	4	9	yes	NA	N.d.	no	yes	yes	no	no	no	present	parotid	surgery	yes	2	1	yes	yes	no	no		NA	5.26027	surgery	yes	NA	deceased	NA	NA	NA	NA	5		830	0.00979192	0.0367197	0.0232558
CSCC-5-T	65	M	no	uknown	Metastasis	acantholytic	moderate	recurrent	Tx	0	1	4	N.d.	N.d.	NA	N.d.	no	no	yes	yes	yes	no	absent	parotid	surgery +XRT	no	0	1	yes	no	no	no		33	32.1534	surgery	no	no	alive	censored	55.5	censored	55.53	56		1885	0.0203209	0.0390374	0.0203209
CSCC-6-T	64	M	no	scalp	Primary	acantholytic	poor	recurrent	rT4	0	0	NA	3	no	5	8	yes	yes	no	no	yes	no	absent		surgery	no	1	0	no	yes	no	no		6	8.58082	surgery	yes	NA	deceased	NA	NA	NA	NA	21		1684	0.0186074	0.0360144	0.0312125
CSCC-7-T	60	M	no	neck	Primary	none	poor	untreated	T2	1	0	3	2.3	no	5	13	no	yes	no	no	no	no	present		none	no	0	0	yes	yes	no	no		NA	NA	surgery + XRT	no	yes	deceased	event	4.8	event	4.8	17		4835	0.0178534	0.020137	0.0205522
CSCC-10-T	76	M	no	periorbital	Primary	acantholytic	poor	recurrent	rT4	0	0	NA	5	yes	NA	9	yes	yes	no	no	yes	yes	absent		surgery +XRT	no	3	0	no	no	no	no		4	60.789	surgery	no	no	deceased	event	3.3	censored	3.29	3		3745	0.0166801	0.0357815	0.0293247
CSCC-11-T	52	M	no	preauricular	Primary	acantholytic	moderate	recurrent	rTx	0	0	NA	1	no	4	3	no	yes	yes	no	no	no	absent		surgery +XRT	yes	3	0	no	yes	basal	no		N.d.	N.d.	surgery	no	yes	deceased	event	9.9	event	9.9	24		4871	0.0160991	0.0427245	0.0334365
CSCC-15-T	66	M	no	cheek	Metastasis	acantholytic	moderate	recurrent	rT2	0	rM1	4	6	yes	5	3.8	yes	no	no	no	no	no	absent	parotid	surgery +XRT	yes	3	0	yes	yes	basal	no		24	94.8493	surgery	no	yes	deceased	event	3	event	2.99	32		1527	0.0276862	0.0388926	0.0388926
CSCC-16-T	77	F	no	preauricular	Primary	acantholytic	moderate	untreated	T2	0	0	NA	4.2	yes	5	3.9	yes	yes	yes	no	no	no	absent		none	no	0	0	no	no	no	yes	Breast	NA	NA	surgery + XRT	no	no	alive	censored	27.7	censored	27.72	28		3587	0.0215869	0.0668028	0.029755
CSCC-17-T	69	M	no	cheek	Primary	acantholytic	moderate	persistent	pTx	0	0	NA	2.8	no	5	N.d.	yes	yes	no	no	no	no	absent		surgery +XRT	no	0	0	no	no	no	no		NA	6.70685	surgery + XRT	no	no	alive	censored	186.8	censored	186.77	187	BCC, SCC	1388	0.0146092	0.0438276	0.0343316
CSCC-18-T	60	M	no	temple infraorbital	Primary	acantholytic	moderate	recurrent	rT3	0	0	NA	5	yes	5	14	yes	yes	no	no	yes	no	absent		surgery	yes	3	0	no	yes	no	no		6	30.0493	surgery + XRT	yes	NA	deceased	NA	NA	NA	NA	10		2128	0.026017	0.0491958	0.0491958
CSCC-19-T	48	M	no	periorbital	Primary	sarcomatoid	poor	persistent	T3	0	0	3	3.5	no	5	14	yes	yes	no	no	no	no	absent		surgery	no	0	0	no	no	no	no		NA	N.d.	surgery	no	no	deceased	event	91.5	censored	74.83	91	Oropharynx SCC	1957	0.0123648	0.0319423	0.0226687
CSCC-20-T	93	M	no	scalp	Primary	none	moderate	recurrent	rT4	0	0	NA	10	yes	5	8	no	yes	no	no	yes	no	absent		surgery	no	2	0	no	no	no	no		6	13.4795	surgery	no	no	deceased	event	42	censored	26.27	42		3587	0.0197149	0.0579315	0.0300273
CSCC-27-T	72	M	no	ear	Primary	acantholytic	moderate	untreated	T2	0	0	2	3.5	no	5	5.3	no	yes	no	no	no	no	absent		none	no	0	0	no	no	no	no		N.d.	NA	surgery	no	no	deceased	event	80.2	censored	55.82	80	BCC, SCC	12112	0.00777181	0.0117404	0.0124018
CSCC-29-T	70	M	no	ear	Primary	acantholytic	moderate	untreated	T2	0	0	2	1.5	no	4	4.8	no	yes	no	no	no	no	absent		none	yes	0	0	no	no	melanoma	no		N.d.	NA	surgery	no	no	deceased	event	167.5	censored	167.47	167	Melanoma	5314	0.0194965	0.0223358	0.0227144
CSCC-30-T	78	M	no	ear	Primary	sarcomatoid	poor	recurrent	rT2	0	0	NA	2	no	4	0.5	no	yes	no	no	no	no	absent		surgery	no	1	0	no	N.d.	no	no		4.5	6.6411	surgery	N.d.	N.d.	alive	NA	NA	NA	NA	NA		1237	0.0203915	0.0424144	0.0228385
CSCC-31-T	59	M	no	preauricular	Primary	acantholytic	moderate	persistent	pTx	0	0	NA	1.5	no	5	10	no	yes	no	no	no	no	absent		surgery +XRT	yes	0	0	no	yes	no	no		NA	12.6575	surgery	no	yes	deceased	event	3.2	event	3.19	25	Lung Ca	11097	0.0152927	0.0181884	0.0223509
CSCC-32-T	76	M	no	cheek	Primary	none	poor	untreated	T2	0	0	2	4	yes	4	8.1	no	no	no	no	no	no	absent		none	no	0	0	no	no	no	no		N.d.	NA	surgery + XRT	no	no	deceased	event	24.8	censored	8.84	25		2144	0.0135831	0.0412178	0.0257611
CSCC-35-T	74	M	no	scalp	Primary	acantholytic	moderate	untreated	T2	0	0	2	1.2	no	4	4.4	yes	no	no	no	no	no	present		none	yes	0	0	no	no	basal	yes	OPC Lund	N.d.	NA	surgery	no	no	deceased	event	37.5	censored	37.55	38	Lung Recurr	2778	0.0145719	0.035337	0.0287796
CSCC-37-T	60	M	no	scalp	Primary	none	well	persistent	pTx	0	0	NA	2.5	no	5	11	yes	no	no	no	no	no	absent		surgery	no	1	0	no	no	no	yes	Lung	NA	1.57808	surgery + XRT	no	no	alive	censored	141.6	censored	141.6	142	SCC	1438	0.0149786	0.0556348	0.0385164
CSCC-38-T	67	M	no	periorbital	Metastasis	none	moderate	recurrent	rTx	0	1	NA	5.5	yes	5	9.6	yes	yes	no	no	yes	no	absent	orbit	surgery	yes	0	0	yes	no	basal	no		N.d.	N.d.	surgery + XRT	no	no	alive	censored	4	censored	4.01	4		2429	0.0132835	0.0298879	0.0278124
CSCC-40-T	49	M	no	scalp	Metastasis	none	moderate	persistent	pTx	1	1	4	N.d.	N.d.	5	4.3	yes	no	yes	yes	no	no	present	parotid	surgery	no	1	0	yes	yes	no	no		3	12.3288	surgery + XRT	no	yes	deceased	event	9.7	event	9.67	14		2667	0.0226991	0.0767643	0.0251754
CSCC-41-T	62	M	no	preauricular	Primary	none	poor	recurrent	rT2	1	0	NA	1.8	no	5	11	no	yes	yes	yes	no	no	present		surgery	no	2	0	yes	yes	no	no		6	7.36438	surgery + XRT	no	yes	deceased	event	10.1	event	10.06	20		3445	0.0218786	0.0250875	0.0207118
CSCC-42-T	69	M	no	ear	Primary	none	moderate	untreated	T2	0	0	2	5	yes	NA	27	no	no	no	no	yes	no	absent		none	no	0	0	no	no	no	no		NA	NA	surgery	no	no	deceased	event	21.6	censored	21.57	22	Laryngeal SCC	568	0.0230496	0.0230496	0.0141844
CSCC-44-T	43	M	no	preauricular	Primary	none	poor	untreated	T2	0	0	2	4	yes	5	10	yes	yes	yes	no	no	no	absent		none	no	0	0	no	yes	no	no		NA	NA	surgery + XRT	no	yes	deceased	event	14.5	event	14.5	16		5891	0.00970708	0.0156676	0.0168597
CSCC-45-T	77	M	no	retroauricular	Metastasis	none	poor	recurrent	rTx	0	1	4	3	no	5	25	yes	yes	no	no	no	no	present	dermal	surgery	yes	0	1	yes	no	basal	no		14	19.3644	surgery + XRT	no	no	alive	censored	151.3	censored	151.3	151	Melanoma	1441	0.0148305	0.049435	0.0261299
CSCC-46-T	69	M	no	nose	Primary	none	moderate	untreated	T2	0	0	2	5	yes	5	7.1	no	yes	no	no	no	no	absent		none	no	0	0	no	no	no	no		NA	NA	surgery + XRT	no	no	alive	censored	24.2	censored	24.16	24		456	0.00677201	0.0474041	0.0519187
CSCC-47-T	56	M	no	ear	Primary	none	poor	persistent	T2	0	0	2	3.4	no	5	9	yes	no	no	no	no	no	absent		surgery	no	0	0	no	no	no	no		NA	NA	surgery	no	no	alive	censored	18.9	censored	18.87	19		1722	0.0203844	0.0390215	0.0238789
CSCC-49-T	67	M	no	periorbital	Primary	acantholytic	poor	persistent	pTx	0	0	NA	2.3	no	5	N.d.	no	yes	no	no	yes	no	absent		surgery +XRT	no	1	0	no	no	no	no		NA	10.8164	surgery + XRT	no	no	deceased	event	116.1	censored	93.76	116	Renal Ca	5250	0.0199119	0.0342715	0.031591
CSCC-52-T	76	M	no	periorbital	Primary	sarcomatoid	poor	recurrent	rT3	0	0	NA	4	yes	5	18.5	yes	yes	no	no	no	no	absent		surgery	no	2	0	no	yes	basal	no		4	4.01096	surgery + XRT	yes	yes	deceased	NA	NA	NA	NA	5		767	0.0144737	0.0355263	0.0144737
CSCC-54-T	80	M	no	preauricular	Primary	none	moderate	untreated	T2	0	0	2	3	no	5	12.5	yes	no	no	no	no	no	absent		none	no	0	0	no	N.d.	basal	yes	Bladder Larynx	NA	NA	surgery	N.d.	N.d.	deceased	NA	NA	NA	NA	7		1218	0.0213816	0.0534539	0.0378289
CSCC-55-T	71	M	yes	scalp	Metastasis	none	moderate	persistent	rTx	0	1	4	0.2	no	5	2.3	yes	no	no	no	no	no	absent	dermal	surgery	yes	3	1	yes	yes	basal	no		NA	6.27945	surgery + XRT	no	yes	alive	event	68.1	event	68.05	137		3990	0.0140916	0.0254152	0.0221439
CSCC-56-T	65	M	no	preauricular	Primary	none	moderate	recurrent	rT2	0	0	NA	2.6	no	5	N.d.	yes	yes	yes	no	no	no	absent		surgery +XRT	yes	2	0	no	no	basal	no		3	22.4219	surgery	no	no	alive	censored	136.8	censored	136.77	137	SCC	3113	0.0213661	0.0498543	0.0349628
CSCC-57-T	76	M	no	periorbital	Primary	none	poor	recurrent	rT4	0	0	NA	N.d.	N.d.	5	6.2	no	yes	no	no	yes	yes	absent		surgery +XRT	yes	1	0	no	yes	basal	no		18	35.6055	surgery	no	yes	alive	event	21.5	event	21.5	22		841	0.0131422	0.0501792	0.0394265
CSCC-58-T	73	F	no	ear	Primary	none	poor	untreated	T2	1	0	3	2.8	no	5	9.5	no	no	yes	yes	no	no	present		none	no	0	0	yes	no	no	no		NA	NA	surgery	no	no	alive	censored	61	censored	60.99	61	BCC	86	0.0357143	0.0833333	0.0357143
CSCC-59-T	71	F	no	nose	Primary	none	moderate	untreated	T2	0	0	2	2.2	no	NA	N.d.	no	yes	no	no	no	no	absent		none	no	0	0	no	no	basal	no		NA	NA	surgery	no	no	deceased	event	19	censored	10.16	19		176	0.0233918	0.0701754	0.0526316
CSCC-60-T	64	M	no	ear	Primary	none	poor	persistent	pTx	0	0	NA	2.7	no	5	15	yes	yes	yes	no	yes	no	absent		surgery	no	0	0	no	no	basal	no		NA	1.57808	surgery + XRT	no	no	alive	censored	92.3	censored	92.25	93		2162	0.0180639	0.0370542	0.0254748
CSCC-62-T	37	M	no	lower lip	Primary	none	moderate	untreated	T2	0	0	2	2.4	no	NA	3	no	yes	no	no	no	no	absent		none	no	0	0	no	no	no	no		NA	NA	surgery	no	no	deceased	event	169.5	censored	94.49	170		3124	0.0102993	0.0312198	0.0260702
	N.d. = not determined
	NA = not applicable
[truncated: 35 more columns]

## Sheet: Table S3
Supplemental Table S3: Tumor purity and ploidy calculations
SampleID	Purity from pathologist	Purity from variant allele fraction	Purity from ABSOLUTE	Ploidy from ABSOLUTE	Cancer DNA fraction from ABSOLUTE	Subclonal genome fraction
CSCC-1-T	0.4	0.435994	0.43	1.86	0.41	0.01
CSCC-2-T	0.7	0.248405	0.29	2.66	0.35	0.02
CSCC-4-T	0.7	0.533969	0.37	4.08	0.55	0
CSCC-5-T	0.3	0.339031	0.2	3.44	0.31	0
CSCC-6-T	0.6	0.349744	0.2	3.23	0.28	0
CSCC-7-T	0.4	0.331933	0.3	2.08	0.3	0.09
CSCC-10-T	0.6	0.724025	0.55	3.77	0.7	0.03
CSCC-11-T	0.3	0.25424	0.3	2.01	0.3	0.15
CSCC-15-T	0.7	0.405436	0.25	3.85	0.4	0
CSCC-16-T	0.4	0.518024	0.38	4.12	0.55	0.01
CSCC-17-T	0.2	0.704392	0.75	2.03	0.75	0.12
CSCC-18-T	0.3	0.517209	0.27	2.62	0.33	0.03
CSCC-19-T	0.7	0.451701	0.56	7.22	0.82	0.02
CSCC-20-T	0.85	0.468927	0.33	4.11	0.5	0.12
CSCC-27-T	0.85	0.58468	0.61	1.93	0.6	0.3
CSCC-29-T	0.7	0.746671	0.26	6.73	0.55	0
CSCC-30-T	N.D.	0.303461	0.31	1.92	0.3	0.02
CSCC-31-T	N.D.	0.605793	0.58	4.97	0.78	0.06
CSCC-32-T	0.6	0.361115	0.34	5.59	0.59	0.01
CSCC-35-T	0.9	0.750446	0.61	3.87	0.75	0.05
CSCC-37-T	0.7	0.188768	N.D.	N.D.	N.D.	N.D.
CSCC-38-T	0.3	0.354298	0.23	4.08	0.37	0
CSCC-40-T	0.4	0.23681	0.25	2.05	0.25	0
CSCC-41-T	0.6	0.608209	0.48	3.98	0.65	0.11
CSCC-42-T	0.7	0.313019	0.28	1.05	0.17	0
CSCC-44-T	0.2	0.272437	0.36	3.12	0.47	0.01
CSCC-45-T	0.6	0.506366	0.37	3.85	0.53	0.01
CSCC-46-T	0.6	0.556996	0.38	3.9	0.54	0.03
CSCC-47-T	0.4	0.25479	0.3	1.99	0.3	0
CSCC-49-T	0.4	0.513697	0.4	3.41	0.53	0.4
CSCC-52-T	N.D.	0.325627	0.34	1.78	0.32	0.17
CSCC-54-T	0.1	0.264393	0.22	2.06	0.23	0
CSCC-55-T	0.4	0.29997	0.33	2.03	0.33	0.03
CSCC-56-T	0.5	0.487724	0.36	3.71	0.51	0.01
CSCC-57-T	0.2	0.214453	0.17	1.95	0.17	0
CSCC-58-T	0.8	0.626961	0.49	3.19	0.61	0.16
CSCC-59-T	0.3	0.27233	0.18	3.39	0.27	0
CSCC-60-T	0.1	0.198516	0.19	1.91	0.18	0
CSCC-62-T	N.D.	0.430087	0.45	2.04	0.45	0.14
N.D. = not determined

## Sheet: Table S4
Supplemental Table S4: Sequencing Coverages
Sample	Unique Mb Sequence	Fold Coverage	Pair q202020	Percent bases at q202020
CSCC-1-N	9315.26	116
CSCC-1-T	9211.43	116	34426251	0.819673
CSCC-10-N	8236.84	103
CSCC-10-T	10107.2	125	34247158	0.815409
CSCC-11-N	9160.47	113
CSCC-11-T	10439.8	132	34419590	0.819514
CSCC-15-N	8636.15	107
CSCC-15-T	9165.1	114	34292282	0.816483
CSCC-16-N	8469.65	104
CSCC-16-T	10963.7	136	34192830	0.814115
CSCC-17-N	7950.62	98
CSCC-17-T	7964.9	101	33718242	0.802815
CSCC-18-N	15681.4	112
CSCC-18-T	15203.2	126	34790925	0.828355
CSCC-19-N	7361.63	93
CSCC-19-T	8909.83	112	34126661	0.81254
CSCC-2-N	8881.18	110
CSCC-2-T	8693.9	109	34352969	0.817928
CSCC-20-N	9384.6	116
CSCC-20-T	10355.5	129	34537910	0.822331
CSCC-27-N	10813.4	135
CSCC-27-T	16288.1	120	34869271	0.830221
CSCC-29-N	8192.32	102
CSCC-29-T	10214.8	128	34357344	0.818032
CSCC-30-N	8408.44	107
CSCC-30-T	9178.55	114	34315034	0.817025
CSCC-31-N	7183.29	90
CSCC-31-T	8673.78	109	33991969	0.809333
CSCC-32-N	7417.36	92
CSCC-32-T	8458.2	105	33751361	0.803604
CSCC-35-N	8640.18	108
CSCC-35-T	9253.69	114	34247935	0.815427
CSCC-37-N	9304.06	116
CSCC-37-T	8948.66	112	34314381	0.817009
CSCC-38-N	9901.61	123
CSCC-38-T	9247.17	117	34406285	0.819197
CSCC-4-N	16620.9	118
CSCC-4-T	16314.5	200	34780027	0.828096
CSCC-40-N	8437.95	105
CSCC-40-T	8093.06	101	34133978	0.812714
CSCC-41-N	7861.45	97
CSCC-41-T	8173.11	100	33948857	0.808306
CSCC-42-N	8726.85	108
CSCC-42-T	9808.15	122	34460390	0.820485
CSCC-44-N	9357.33	117
CSCC-44-T	9521.53	119	34446999	0.820167
CSCC-45-N	11593.1	145
CSCC-45-T	15782.7	117	34887462	0.830654
CSCC-46-N	7884.1	99
CSCC-46-T	8658.19	109	34227618	0.814943
CSCC-47-N	6381.73	81
CSCC-47-T	7178.87	90	33689231	0.802125
CSCC-49-N	11000.8	133
CSCC-49-T	15035.5	113	34740782	0.827161
CSCC-5-N	7328.96	91
CSCC-5-T	10244.4	128	34059839	0.810949
CSCC-52-N	15856.7	120
CSCC-52-T	15942	110	34578195	0.82329
CSCC-54-N	7595.54	96
CSCC-54-T	8989.72	114	34210808	0.814543
CSCC-55-N	7087.9	88
CSCC-55-T	9296.37	117	34110758	0.812161
CSCC-56-N	11269.1	137
CSCC-56-T	15343.7	115	34825337	0.829175
CSCC-57-N	15465.3	107
CSCC-57-T	14051.1	110	34658563	0.825204
CSCC-58-N	12222.3	148
CSCC-58-T	15405.6	108	34724549	0.826775
CSCC-59-N	12903.9	157
CSCC-59-T	18829.1	134	34930129	0.83167
CSCC-6-N	8000.71	99
CSCC-6-T	9949.34	124	34103219	0.811981
CSCC-60-N	11005.6	134
CSCC-60-T	15084.8	112	34817732	0.828994
CSCC-62-N	11590.4	142
CSCC-62-T	16600.3	121	34931058	0.831692
CSCC-7-N	8847.58	111
CSCC-7-T	8900.05	111	34288784	0.8164

## Sheet: Table S6
Supplemental Table S6: Allele fraction analysis
Gene	varcount	afcc	afl.p	afl.fdr			Flag	Description
SOX9	7	-0.959724	0.289062	0.624297		varcount		Variant count
MICALL1	6	-0.831738	0.78125	0.92665		afcc	negative	Allele fraction v. Median AF correlation coefficient
DGKZ	6	-0.80096	0.71875	0.893763		afl.p	<0.05	Allele fraction difference less than median (one-sided) p-value
ACVR1	6	-0.789315	0.5	0.775107		afl.fdr	<0.1	Allele fraction difference less than median (one-sided) FDR
RGPD4	7	-0.670638	0.234375	0.585439
NCR1	7	-0.589284	0.765625	0.922185
ADCK4	8	-0.528992	0.273438	0.624249
KCNN2	7	-0.467786	0.46875	0.76405
HR	6	-0.465709	0.890625	0.97411
MTHFD1L	6	-0.434469	0.109375	0.439193
SV2A	8	-0.424474	0.527344	0.799663
MRC2	10	-0.417579	0.577148	0.825309
PON2	7	-0.411756	0.148438	0.501417
SLC28A1	8	-0.381643	0.421875	0.719363
ULK4	6	-0.361085	0.65625	0.858355
JUP	6	-0.360439	0.65625	0.858355
FUK	9	-0.360322	0.589844	0.831708
HTR3E	6	-0.344055	0.421875	0.719363
UGGT1	8	-0.334196	0.191406	0.548356
SFSWAP	6	-0.315908	0.15625	0.501417
GRAMD1A	6	-0.313745	0.15625	0.501417
PRR23B	10	-0.31001	0.652344	0.858355
CHFR	10	-0.308947	0.1875	0.548356
LILRB3	7	-0.295157	0.710938	0.893763
C17orf97	6	-0.286441	0.34375	0.663512
RPS6KA1	6	-0.284834	0.28125	0.624249
CPEB2	7	-0.247209	0.148438	0.501417
MRGPRF	7	-0.243329	0.976562	1
PRX	11	-0.243181	0.13916	0.500517
KRTAP13-2	8	-0.223227	0.421875	0.719363
GRB10	7	-0.222078	0.1875	0.548356
KRT1	7	-0.221181	0.65625	0.858355
CRTAC1	12	-0.220153	0.740723	0.911106
ATAD2	6	-0.215075	0.65625	0.858355
RPA1	6	-0.206467	0.078125	0.388207
C10orf90	12	-0.201572	0.484863	0.775107
ENG	6	-0.196918	0.78125	0.92665
PIKFYVE	17	-0.194839	0.644051	0.858355
IRX1	6	-0.181569	0.78125	0.92665
FAM184B	10	-0.17111	0.0527344	0.334813
MED12	6	-0.162709	0.984375	1
TXK	7	-0.162267	0.46875	0.76405
RUSC2	8	-0.157159	0.875	0.970461
PLXDC2	7	-0.1525	0.234375	0.585439
CALD1	6	-0.146752	0.078125	0.388207
CCBE1	8	-0.144776	0.273438	0.624249
ANKRD33	7	-0.144625	0.078125	0.388207
NPLOC4	6	-0.144282	0.5	0.775107
PCDHB7	19	-0.124664	0.00195885	0.112355
GRK1	6	-0.123981	0.921875	0.989422
TTPA	6	-0.115139	0.28125	0.624249
DFNB31	11	-0.109891	0.983887	1
OR7D2	7	-0.106913	0.148438	0.501417
OR1L8	8	-0.106563	0.679688	0.876181
ADAMTS2	15	-0.105193	0.0602722	0.3617
KLHL33	8	-0.102029	0.769531	0.922185
RABGGTA	6	-0.0961048	0.34375	0.663512
IVL	9	-0.0922768	0.787109	0.929352
USP6NL	7	-0.0878992	0.0234375	0.246546
CSPG5	6	-0.0785797	0.5	0.775107
FAM184A	7	-0.0777705	0.0546875	0.334813
OR10T2	13	-0.0760339	0.227417	0.585439
ATP8A2	10	-0.0722441	0.5	0.775107
SLC39A4	6	-0.0720441	0.84375	0.953785
TNFAIP2	8	-0.0694397	0.628906	0.858355
SLC24A6	6	-0.062639	0.5	0.775107
NLRP1	7	-0.0618799	0.53125	0.799663
SBK2	7	-0.0558079	0.710938	0.893763
ZC3H14	6	-0.0552646	0.84375	0.953785
URB2	7	-0.0547122	0.765625	0.922185
INSM2	6	-0.05405	0.84375	0.953785
FADS2	9	-0.0448192	0.150391	0.501417
KRT73	11	-0.0436184	0.415527	0.719363
GTF3C5	7	-0.0416663	0.710938	0.893763
SYCP2L	8	-0.0379802	0.472656	0.765356
ACAP1	8	-0.0332351	0.320312	0.65542
ZNF585A	6	-0.0312912	0.078125	0.388207
ELAVL3	9	-0.0287454	0.0484538	0.327263
SERPINE3	6	-0.028603	0.21875	0.57472
MAML3	6	-0.0275983	0.78125	0.92665
CABP2	7	-0.0244741	0.1875	0.548356
SGSM1	6	-0.0207276	0.5	0.775107
AXIN1	7	-0.0194948	0.890625	0.97411
CTSW	6	-0.014339	0.015625	0.204665
CLEC5A	6	-0.0130657	0.109375	0.439193
KAT6A	6	-0.0109512	0.71875	0.893763
SLC35F3	6	-0.00886866	0.421875	0.719363
OR4D2	7	-0.00275554	0.34375	0.663512
CPN1	6	-0.00261038	0.03125	0.27245
H1FNT	7	-0.000150775	0.65625	0.858355
C11orf35	7	0.00255134	0.960938	1
ZFC3H1	6	0.00320949	0.34375	0.663512
GANC	7	0.00348648	0.1875	0.548356
TLE1	8	0.0055758	0.726562	0.898556
MPP4	6	0.00740095	0.5	0.775107
LSG1	6	0.0157876	0.5	0.775107
TBXA2R	6	0.01903	0.65625	0.858355
SMG7	12	0.0194016	0.190186	0.548356
DTX4	7	0.0199258	0.0390625	0.297279
ZNF516	6	0.0202663	0.921875	0.989422
TRIP12	7	0.0235165	0.289062	0.624297
IL21R	10	0.025919	0.116211	0.456492
CABP4	10	0.0269174	0.137695	0.498871
ITGB1	6	0.0340597	0.28125	0.624249
LMF2	6	0.0362611	0.921875	0.989422
SGCD	7	0.0362971	0.65625	0.858355
CASKIN1	13	0.0384679	0.207153	0.57472
UNC13B	7	0.0402107	0.59375	0.831708
PRB1	10	0.0414707	0.0527344	0.334813
DRD3	8	0.0427996	0.0078125	0.176898
EBF3	11	0.045972	0.012207	0.204665
FBRSL1	8	0.0491876	0.527344	0.799663
AHCYL2	8	0.0515321	0.628906	0.858355
NEK11	6	0.0527944	0.34375	0.663512
CPXM2	14	0.0534781	0.147888	0.501417
CERCAM	11	0.0538022	0.793457	0.933812
PPL	9	0.0562753	0.326172	0.662187
P2RY6	6	0.0564457	0.890625	0.97411
CPT1A	10	0.0607261	0.652344	0.858355
IRF2BPL	8	0.0632224	0.726562	0.898556
HCRTR2	8	0.0661557	0.769531	0.922185
SLC26A3	10	0.0665813	0.161133	0.508698
MNT	7	0.067883	0.65625	0.858355
C1orf158	6	0.0680812	0.21875	0.57472
AKAP13	11	0.0681897	0.51709	0.796163
ENPP1	10	0.0752432	0.1875	0.548356
CECR2	7	0.0754843	0.234375	0.585439
SGCE	14	0.0783174	0.213135	0.57472
OR51V1	7	0.0790875	0.109375	0.439193
TRIM55	6	0.0791995	0.15625	0.501417
UMOD	9	0.0809241	0.0820312	0.393822
GABRG3	8	0.0856638	0.628906	0.858355
MAGEB18	6	0.0878851	0.984375	1
STK32A	6	0.0907356	0.421875	0.719363
HNRNPCL1	15	0.0941571	3.05176e-05	0.0124614
ACSM4	9	0.0952814	0.248047	0.600982
TMEM63C	10	0.0970728	0.1875	0.548356
TAAR6	7	0.0971388	0.34375	0.663512
PAK2	6	0.0990969	0.421875	0.719363
PPFIA3	7	0.101802	0.40625	0.719363
LY9	10	0.102029	0.422852	0.719363
TRHR	9	0.102077	0.179688	0.546993
PDE8B	12	0.102281	0.026123	0.253826
IQCE	7	0.104043	0.34375	0.663512
BRPF1	7	0.104532	0.40625	0.719363
KIAA1429	8	0.106521	0.191406	0.548356
OR2A2	8	0.116001	0.273438	0.624249
ANXA11	6	0.116314	0.109375	0.439193
KIF1C	13	0.117494	0.095459	0.433683
PPFIA4	8	0.118504	0.273438	0.624249
SMARCC2	6	0.118846	0.28125	0.624249
RFPL1	8	0.119396	0.0976562	0.433683
STK19	7	0.120656	0.921875	0.989422
ESRRB	10	0.122382	0.21582	0.57472
TGM1	7	0.124801	0.82416	0.94964
PDIA5	6	0.125401	0.71875	0.893763
C9orf171	7	0.125727	0.46875	0.76405
SNAPC4	10	0.127825	0.0527344	0.334813
FAM65C	8	0.130286	0.421875	0.719363
ZNF628	7	0.13132	0.289062	0.624297
WDR27	11	0.132871	0.160156	0.508698
TRIM15	6	0.133254	0.65625	0.858355
CCDC110	14	0.133313	0.427612	0.724296
DNM1	7	0.135059	0.46875	0.76405
SLC28A2	10	0.136174	0.3125	0.65494
LDLR	9	0.136854	0.849609	0.953785
SOGA1	14	0.136981	0.768433	0.922185
LRRTM3	8	0.137613	0.191406	0.548356
GJA5	6	0.138968	0.578125	0.825309
TIMD4	10	0.139138	0.3125	0.65494
MEOX2	7	0.140165	0.40625	0.719363
KLHL32	7	0.140746	0.40625	0.719363
MAP7D1	9	0.144154	0.751953	0.920142
OR51A4	12	0.147722	0.150635	0.501417
FANCI	6	0.148084	0.578125	0.825309
SH2D3C	16	0.148572	0.701706	0.893763
NCAPH2	6	0.148759	0.71875	0.893763
CREB3L3	10	0.148849	0.5	0.775107
UCP3	6	0.151399	0.15625	0.501417
GP6	11	0.151426	0.13916	0.500517
LYN	7	0.15167	0.53125	0.799663
KRTAP5-4	7	0.153671	0.59375	0.831708
COBLL1	8	0.155224	0.0546875	0.334813
LRRC6	7	0.155373	0.851562	0.953785
PACS2	11	0.155529	0.584473	0.829589
SLC9A5	7	0.156083	0.46875	0.76405
TRIM41	6	0.158836	0.5	0.775107
TRPV1	10	0.159817	0.00976562	0.194208
GPSM1	9	0.160118	0.875	0.970461
CEP152	6	0.16063	0.5	0.775107
MEF2A	6	0.163143	0.109375	0.439193
HMGCLL1	7	0.164539	0.289062	0.624297
HOXB3	6	0.165111	0.84375	0.953785
ATP13A2	12	0.166598	0.973877	1
MED23	6	0.166671	0.78125	0.92665
PCED1B	10	0.16709	0.0419922	0.302666
POLN	8	0.167185	0.578125	0.825309
SMC1B	10	0.167603	0.5	0.775107
HHATL	6	0.168231	0.921875	0.989422
KCNH3	7	0.168495	0.46875	0.76405
UHRF1BP1	6	0.169503	0.34375	0.663512
ESRRG	6	0.170091	0.5	0.775107
WDPCP	7	0.171144	0.53125	0.799663
PIGG	6	0.172992	0.15625	0.501417
USP9X	7	0.173051	0.945312	1
OR4K5	12	0.175022	0.00341797	0.13139
KRT78	6	0.175432	0.078125	0.388207
MYO6	9	0.17661	0.00976562	0.194208
CTSG	7	0.17761	0.65625	0.858355
ZSCAN23	11	0.180039	0.584473	0.829589
IRS2	10	0.181838	0.958008	1
TBC1D13	6	0.182018	0.84375	0.953785
ALDH3B2	8	0.182369	0.230469	0.585439
SMEK1	6	0.182384	0.578125	0.825309
BIN1	9	0.183187	0.544922	0.80899
BCLAF1	23	0.18775	3.57628e-07	0.000243589
PAX3	6	0.188615	0.21875	0.57472
TRRAP	24	0.189248	0.245399	0.600982
C19orf57	8	0.189612	0.320312	0.65542
SSH2	7	0.190429	0.40625	0.719363
DDR1	8	0.190958	0.679688	0.876181
TNRC6B	10	0.191316	0.539062	0.8063
PLIN4	15	0.192844	0.0473022	0.322187
OR5K1	6	0.193653	0.578125	0.825309
ZNF117	8	0.19376	0.371094	0.69084
LHX8	6	0.194166	0.953125	1
EPPK1	28	0.19503	0.414363	0.719363
OR10S1	6	0.195505	0.578125	0.825309
AP3D1	8	0.196676	0.191406	0.548356
HCFC1	6	0.197179	0.890625	0.97411
ZPLD1	8	0.199369	0.125	0.466205
ANKRD18B	8	0.200729	0.945312	1
CACNA1I	17	0.201426	0.079689	0.390991
GIMAP7	6	0.201803	0.28125	0.624249
ESYT2	7	0.201994	0.40625	0.719363
KIAA1551	10	0.202655	0.137695	0.498871
DNAAF1	6	0.204819	0.28125	0.624249
ZNF512B	7	0.206133	0.765625	0.922185
SSTR3	9	0.206931	0.820312	0.945948
IKZF1	12	0.208488	0.0646973	0.374502
PTGER3	6	0.209605	0.15625	0.501417
SPSB4	7	0.212615	0.0546875	0.334813
GLT6D1	7	0.213222	0.59375	0.831708
LRRC16B	10	0.214049	0.3125	0.65494
AMPD2	13	0.215896	0.980103	1
CT47B1	6	0.216209	1	1
LMF1	8	0.217873	0.273438	0.624249
ZNF99	13	0.217905	0.0549316	0.334813
AIM1L	8	0.218339	0.527344	0.799663
CAPRIN2	7	0.21858	0.59375	0.831708
ZNF831	47	0.219273	0.133475	0.492088
VPS18	11	0.220642	0.0507812	0.334813
SH2D4A	8	0.220843	0.191406	0.548356
SEC23A	8	0.221005	0.808594	0.941981
KCNJ18	12	0.223557	0.000244141	0.0458732
TXNDC2	12	0.223871	0.545166	0.80899
OR5M8	10	0.224395	0.422852	0.719363
JHDM1D	6	0.225752	0.34375	0.663512
CAPN11	6	0.227046	0.046875	0.322187
HS1BP3	6	0.22732	0.21875	0.57472
DUSP27	23	0.228442	0.692123	0.887174
ANP32C	6	0.22879	0.34375	0.663512
AIM1	7	0.229329	0.765625	0.922185
CDK5RAP2	8	0.230703	0.84375	0.953785
RGS22	14	0.231183	0.524231	0.799663
PVRL4	7	0.23136	0.65625	0.858355
SLC7A4	7	0.232215	0.399748	0.719363
SLC13A4	8	0.23234	0.125	0.466205
HSPA12A	7	0.232362	0.135521	0.497609
KIR3DL2	8	0.232524	0.0742188	0.388207
MMP9	7	0.232757	0.40625	0.719363
KIAA1009	7	0.234252	0.1875	0.548356
TMC3	12	0.235873	0.0756836	0.388207
SLC35F4	9	0.236557	0.0136719	0.204665
ZPBP	6	0.238489	0.578125	0.825309
DEF8	6	0.242843	0.71875	0.893763
ZNF883	8	0.24319	0.628906	0.858355
CAMSAP2	10	0.244464	0.00976562	0.194208
RXRG	7	0.244873	0.148438	0.501417
CLYBL	6	0.246334	0.34375	0.663512
SLC6A18	12	0.24649	0.740723	0.911106
ACTG2	10	0.249898	0.27832	0.624249
HAP1	6	0.25005	0.65625	0.858355
SOBP	10	0.250769	0.753906	0.920259
BTNL8	6	0.251587	0.21875	0.57472
HOMEZ	6	0.252861	0.34375	0.663512
RB1	7	0.253375	0.8125	0.941981
CYP19A1	6	0.253449	0.078125	0.388207
DBH	12	0.254197	0.688965	0.883691
HTR1D	7	0.254309	0.765625	0.922185
ZNF74	7	0.255674	0.46875	0.76405
ZNF792	6	0.257044	0.28125	0.624249
CYTH4	7	0.260139	0.65625	0.858355
DLGAP3	9	0.26045	0.0820312	0.393822
BRD1	11	0.260462	0.839844	0.953785
TMEM132E	8	0.260753	0.679688	0.876181
LCA5	8	0.261464	0.628906	0.858355
KANSL1L	6	0.263588	0.21875	0.57472
ZNF750	8	0.265054	0.527344	0.799663
DOCK3	15	0.265211	0.0534973	0.334813
ANO3	11	0.268378	0.382324	0.7031
OXER1	6	0.269272	0.921875	0.989422
FAM13C	9	0.271103	0.150391	0.501417
ZNFX1	6	0.272701	0.421875	0.719363
TMEM8A	6	0.272749	0.28125	0.624249
PCDHGB3	10	0.273935	0.0185547	0.220862
CRB1	27	0.274354	0.139621	0.501417
HEATR4	13	0.27498	0.227417	0.585439
CCDC169-SOHLH2	6	0.275023	0.5	0.775107
CCDC40	14	0.275227	0.213135	0.57472
CCSER2	6	0.276296	0.84375	0.953785
SYNJ2	8	0.276886	0.421875	0.719363
XAB2	6	0.277602	0.65625	0.858355
ARHGEF6	8	0.277909	0.960938	1
EPAS1	6	0.278162	0.28125	0.624249
KLHL25	8	0.279219	0.527344	0.799663
REG1B	6	0.279484	0.78125	0.92665
KCNH5	18	0.280081	0.0493698	0.329273
SLC45A2	6	0.280224	0.421875	0.719363
NFXL1	6	0.280448	0.109375	0.439193
SLCO2B1	8	0.280715	0.191406	0.548356
FOXP2	8	0.281095	0.0117188	0.204665
CKAP5	8	0.283572	0.0546875	0.334813
NRD1	7	0.283715	0.40625	0.719363
NPY1R	10	0.284589	0.21582	0.57472
OR5M11	8	0.285995	0.15625	0.501417
TCHH	6	0.287141	0.15625	0.501417
NIPAL3	6	0.288135	0.71875	0.893763
CABS1	10	0.28836	0.539062	0.8063
TTC23	6	0.288983	0.15625	0.501417
CCDC33	9	0.289593	0.0371094	0.297279
LILRB4	9	0.290269	0.455078	0.757167
JRK	8	0.290343	0.808594	0.941981
MKX	6	0.291747	0.34375	0.663512
KANK4	15	0.291919	0.576538	0.825309
CCDC114	7	0.291993	0.53125	0.799663
MAGEB3	9	0.292098	0.986328	1
PRB2	14	0.292155	0.00262451	0.125447
FCRL5	16	0.292877	0.56987	0.825309
QRICH1	8	0.293097	0.0390625	0.297279
ENPP5	9	0.293115	0.917969	0.989422
TBC1D14	6	0.293907	0.28125	0.624249
DDI1	19	0.294107	0.674625	0.876181
NOX3	14	0.294909	0.270813	0.624249
RBAK	6	0.295084	0.578125	0.825309
DNER	12	0.295611	0.234863	0.585439
PCDHB8	18	0.29657	1.90735e-05	0.00866095
INO80	13	0.297215	0.0838623	0.399446
EDC4	8	0.300431	0.769531	0.922185
SOX10	8	0.300937	0.527344	0.799663
ANKFN1	11	0.30129	0.288574	0.624297
APLNR	7	0.30298	0.34375	0.663512
SBF1	12	0.303096	0.545166	0.80899
RNF216	6	0.303318	0.421875	0.719363
ABCA6	21	0.303715	0.0443993	0.317496
ZFP2	7	0.30372	0.289062	0.624297
CHTF18	9	0.304291	0.455078	0.757167
GCK	12	0.305083	0.809814	0.941981
DAPK1	12	0.305517	0.866943	0.967433
ZNF180	7	0.305754	0.1875	0.548356
DCT	9	0.306273	0.751953	0.920142
CTIF	6	0.307101	0.953125	1
DNAI2	8	0.307557	0.15625	0.501417
ATXN2	12	0.307768	0.211914	0.57472
TAS1R1	8	0.309028	0.125	0.466205
ZNF737	7	0.309353	0.34375	0.663512
SLC30A3	11	0.309595	0.584473	0.829589
HDAC5	6	0.309662	0.34375	0.663512
ESPN	7	0.310754	0.234375	0.585439
MUC20	7	0.310845	0.0078125	0.176898
OR52L1	7	0.311002	0.59375	0.831708
BPIFC	8	0.311612	0.945312	1
CACNA1B	22	0.311722	0.636908	0.858355
KCNG4	11	0.311922	0.350098	0.670067
BTBD18	7	0.312683	0.148438	0.501417
MAST3	6	0.312987	0.578125	0.825309
CCDC87	7	0.313356	0.8125	0.941981
IFNL2	8	0.313665	0.0976562	0.433683
CCIN	10	0.314492	0.90332	0.980712
RGS6	6	0.317152	0.65625	0.858355
NME8	14	0.318299	0.147888	0.501417
MLLT3	7	0.31918	0.960938	1
OLFM4	8	0.31932	0.0390625	0.297279
NPHP3	7	0.31936	0.289062	0.624297
IFNG	6	0.31956	0.34375	0.663512
C8orf34	10	0.321238	0.0800781	0.390991
CES5A	8	0.321881	0.628906	0.858355
P2RX1	9	0.321897	0.101562	0.439193
PSMB11	7	0.322596	0.8125	0.941981
TRPV6	7	0.322897	0.890625	0.97411
ANKLE1	6	0.323148	0.421875	0.719363
CCDC14	7	0.323348	0.8125	0.941981
WDR60	7	0.323842	0.0546875	0.334813
NTRK1	6	0.32387	0.84375	0.953785
EGFLAM	14	0.324584	0.380432	0.703085
CPS1	24	0.324738	0.301656	0.642832
NPHS1	19	0.325322	0.445284	0.75096
CD2	7	0.325536	0.234375	0.585439
FAM71F1	9	0.32649	0.125	0.466205
ANKIB1	6	0.32649	0.078125	0.388207
FOXR2	8	0.327149	1	1
BMPR1B	8	0.327349	0.320312	0.65542
RASGRP2	6	0.328364	0.109375	0.439193
ZFP106	9	0.328779	0.0273438	0.253826
HEPACAM2	12	0.330058	0.101807	0.439193
BCL9	15	0.330633	0.151398	0.501417
PPARGC1A	10	0.331692	0.3125	0.65494
CD1B	7	0.332107	0.078125	0.388207
BCR	6	0.332624	0.78125	0.92665
HAPLN4	7	0.333087	0.34375	0.663512
ZDHHC11	6	0.334294	0.015625	0.204665
SLCO1B1	19	0.334922	0.00904083	0.193951
TULP2	10	0.335006	0.137695	0.498871
SERPINI1	6	0.335675	0.28125	0.624249
UGT2B10	9	0.335897	0.125	0.466205
CPE	6	0.336399	0.65625	0.858355
OR6N2	7	0.336437	0.289062	0.624297
CNGA1	7	0.336476	0.1875	0.548356
FARP1	11	0.336514	0.350098	0.670067
MAP3K4	7	0.338081	0.59375	0.831708
PIF1	9	0.338133	0.875	0.970461
ARFGEF2	8	0.338469	0.421875	0.719363
MIPEP	6	0.338862	0.015625	0.204665
BTBD7	6	0.339014	0.28125	0.624249
RTL1	29	0.339615	0.880871	0.97411
IGF1R	9	0.340124	0.125	0.466205
BAAT	8	0.340572	0.769531	0.922185
ALPPL2	6	0.340733	0.28125	0.624249
POM121L12	17	0.34083	0.201881	0.573541
MAST1	9	0.340865	0.0273438	0.253826
OR4S2	16	0.342539	0.973833	1
FAM65B	16	0.342566	0.609024	0.848989
CEACAM18	10	0.342735	0.5	0.775107
KDM4A	6	0.343043	0.21875	0.57472
VPS51	6	0.344393	0.28125	0.624249
ATG2A	16	0.345382	0.410446	0.719363
DDHD2	6	0.345504	0.15625	0.501417
EML5	15	0.345799	0.319336	0.65542
ZNF682	7	0.346111	0.53125	0.799663
CHD3	12	0.346676	0.788086	0.929699
CNKSR1	10	0.346857	0.652344	0.858355
TLE3	7	0.347103	0.851562	0.953785
PUS1	6	0.347178	0.890625	0.97411
ADRA1A	8	0.348425	0.679688	0.876181
CAPN14	6	0.349288	0.21875	0.57472
LAMP5	9	0.349772	0.367188	0.690612
ZFYVE1	6	0.350665	0.421875	0.719363
AGO1	6	0.3509	0.28125	0.624249
EMILIN2	15	0.350965	0.227142	0.585439
XKR7	7	0.350982	0.890625	0.97411
TROAP	9	0.351015	0.326172	0.662187
TMPRSS11B	6	0.351065	0.28125	0.624249
SYT14	8	0.351125	0.421875	0.719363
SUV420H1	9	0.351308	0.326172	0.662187
PCSK4	7	0.35151	0.921875	0.989422
INPP4A	6	0.352357	0.28125	0.624249
CTSH	8	0.352717	0.191406	0.548356
OR2L8	7	0.352759	0.148438	0.501417
ERBB2	14	0.352937	0.837097	0.953785
NID1	20	0.353113	0.36141	0.686894
OPRM1	12	0.353144	0.133057	0.490877
ACAD10	14	0.353261	0.619568	0.855123
OR6C6	8	0.354296	0.527344	0.799663
DZIP1L	12	0.354864	0.259277	0.621089
KRT84	19	0.356318	0.0843964	0.400938
LPIN1	8	0.357506	0.230469	0.585439
EMR3	13	0.357821	0.1698	0.526902
ART4	7	0.358914	0.34375	0.663512
AARS2	7	0.3599	0.765625	0.922185
TBC1D2	6	0.360396	0.21875	0.57472
ACLY	9	0.36212	0.5	0.775107
CRYBB2	7	0.36252	0.710938	0.893763
TCF3	7	0.364028	0.65625	0.858355
CCDC178	12	0.364213	0.00610352	0.176898
OLFM1	7	0.364264	0.34375	0.663512
ZNF598	8	0.364455	0.583283	0.829589
SKIV2L	9	0.365272	0.787109	0.929352
SLC17A6	10	0.365781	0.5	0.775107
SYNDIG1	12	0.366192	0.425049	0.721524
ZNF71	9	0.366329	0.125	0.466205
LRRTM1	20	0.366636	0.184138	0.548356
NCOR2	13	0.366754	0.553711	0.816334
C2orf16	31	0.366831	0.0650828	0.374502
MARK4	7	0.36716	0.1875	0.548356
FAM188B	8	0.367183	0.679688	0.876181
FUT9	16	0.367226	0.096405	0.433683
DOPEY2	9	0.367863	0.951172	1
KDM5B	13	0.367952	0.5	0.775107
DOCK8	7	0.368651	0.960938	1
SLC5A11	11	0.368867	0.550781	0.812543
BOC	7	0.369064	0.109375	0.439193
R3HDM1	10	0.369506	0.460938	0.763883
SEC31B	10	0.369728	0.422852	0.719363
RANBP3L	10	0.369966	0.539062	0.8063
NKAIN3	9	0.370563	0.820312	0.945948
ROCK2	16	0.371201	0.812271	0.941981
SYNRG	6	0.371307	0.21875	0.57472
OC90	15	0.372337	0.138428	0.500517
KIF14	8	0.372881	0.125	0.466205
SLC4A7	7	0.373175	0.46875	0.76405
CELSR2	19	0.373212	0.445284	0.75096
LRGUK	7	0.373361	0.109375	0.439193
PLCZ1	6	0.373592	0.578125	0.825309
ZDHHC8	11	0.374223	0.617676	0.854026
MYH7B	19	0.374258	0.0978165	0.434041
AKAP12	18	0.374465	0.466141	0.76405
ALS2CR11	6	0.374883	0.21875	0.57472
KCNN3	13	0.375275	0.1698	0.526902
MMP8	10	0.375651	0.3125	0.65494
ADCK1	6	0.376016	0.015625	0.204665
SRRM4	14	0.376309	0.786865	0.929352
SLC17A9	7	0.376583	0.40625	0.719363
SLITRK6	6	0.376678	0.65625	0.858355
MC2R	8	0.376715	0.191406	0.548356
PKN3	10	0.377465	0.8125	0.941981
UNC45B	8	0.377706	0.769531	0.922185
HTR1E	9	0.377721	0.751953	0.920142
GON4L	12	0.378476	0.484863	0.775107
FAM160A2	9	0.379676	0.285156	0.624297
CEACAM7	8	0.380433	0.472656	0.765356
SELP	11	0.381064	0.584473	0.829589
RINL	7	0.381218	0.976562	1
ZBTB4	8	0.381266	0.902344	0.980712
DPYS	6	0.382019	0.421875	0.719363
ARHGAP39	16	0.382033	0.994507	1
SLC9A2	8	0.382171	0.578125	0.825309
FBXO39	7	0.382316	0.109375	0.439193
CAMK1D	6	0.382706	0.109375	0.439193
PI4KB	10	0.38345	0.615234	0.853683
CPSF2	6	0.383504	0.28125	0.624249
NCKAP1	6	0.385438	0.28125	0.624249
SLC7A14	12	0.387139	0.0756836	0.388207
ZSWIM2	7	0.387177	0.46875	0.76405
PKD1	18	0.387628	0.955116	1
ARHGEF17	22	0.387847	0.104964	0.439193
TTBK1	23	0.387961	0.213709	0.57472
TAF6	7	0.388012	0.34375	0.663512
C2orf71	14	0.388134	0.00537109	0.160808
GH1	6	0.389634	0.15625	0.501417
PLEKHH1	13	0.390298	0.580322	0.827795
CCDC80	13	0.390469	0.0401611	0.300602
NRP2	9	0.390778	0.367188	0.690612
DAB2IP	10	0.391296	0.947266	1
SLC17A7	9	0.391385	0.285156	0.624297
KRT79	12	0.391442	0.633301	0.858355
EPS8L3	12	0.391496	0.0756836	0.388207
ZBTB7A	8	0.391537	0.125	0.466205
PLCB3	11	0.391793	0.415527	0.719363
MLL3	30	0.392052	0.114276	0.456492
ZNF699	12	0.392319	0.515137	0.795404
ITGA2B	9	0.392601	0.972656	1
ELFN1	11	0.393869	0.0874023	0.409154
MAML2	6	0.394276	0.28125	0.624249
ZC3HAV1	9	0.394656	0.0371094	0.297279
ITGB2	6	0.39473	0.71875	0.893763
PLXNB2	10	0.395137	0.384766	0.703789
OR2T34	6	0.395429	0.15625	0.501417
PLD4	6	0.395662	0.84375	0.953785
CLEC16A	11	0.39603	0.584473	0.829589
CCDC180	17	0.396094	0.964294	1
XRN2	6	0.396302	0.71875	0.893763
NPNT	6	0.398755	0.046875	0.322187
LMTK3	16	0.399052	0.174194	0.537173
PTPN22	13	0.39943	0.00402832	0.133032
ALDH1A1	9	0.400046	0.455078	0.757167
SEMA4D	8	0.400822	0.84375	0.953785
CLCN2	8	0.401768	0.320312	0.65542
TRPC6	6	0.402172	0.28125	0.624249
CACNA2D3	13	0.40268	0.00170898	0.109556
C12orf50	6	0.403526	0.015625	0.204665
DENND5B	12	0.404003	0.849365	0.953785
KCND3	7	0.404621	0.46875	0.76405
CDK12	9	0.40481	0.751953	0.920142
F10	9	0.404897	0.898438	0.979313
RBM6	11	0.405048	0.103027	0.439193
MPRIP	9	0.405461	0.849609	0.953785
KNTC1	15	0.4057	0.0276794	0.256506
GABRA5	13	0.405771	0.526978	0.799663
GSE1	9	0.405787	0.962891	1
SPATS2	7	0.405916	0.078125	0.388207
ISM2	8	0.406341	0.0546875	0.334813
REXO1	9	0.407159	0.589844	0.831708
ANKRD24	10	0.408072	0.8125	0.941981
MUC4	117	0.409084	1.82927e-11	3.32257e-08
C20orf26	20	0.40958	0.108084	0.439193
PER1	12	0.409641	0.234863	0.585439
GPR97	14	0.409788	0.0863037	0.406807
EPHA10	15	0.410098	0.700256	0.893763
PCOLCE2	6	0.410314	0.03125	0.27245
TMEM119	10	0.411268	0.384766	0.703789
SLC6A9	10	0.41166	0.615234	0.853683
CPXM1	8	0.411975	0.0273438	0.253826
NLRC5	11	0.412764	0.86084	0.962791
CDH23	36	0.412783	0.0104801	0.198312
ATP2A1	10	0.412849	0.137695	0.498871
SLC41A3	9	0.413558	0.125	0.466205
GRIK2	19	0.413617	0.0843964	0.400938
SEC16A	19	0.413774	0.879374	0.973696
HAS2	12	0.414355	0.234863	0.585439
NTN5	8	0.414524	0.808594	0.941981
TSHZ1	8	0.414652	0.628906	0.858355
TBC1D9	17	0.415133	0.338852	0.663512
TPCN1	6	0.415319	0.34375	0.663512
LEMD3	6	0.41534	0.34375	0.663512
CYP4X1	7	0.415968	0.46875	0.76405
TULP1	9	0.416085	0.898438	0.979313
OR52H1	6	0.416091	0.65625	0.858355
FAM129A	7	0.416385	0.710938	0.893763
S1PR1	6	0.416648	0.34375	0.663512
MCOLN3	12	0.416665	0.116699	0.456492
ZBTB20	13	0.416687	0.446289	0.751028
RREB1	15	0.416721	0.380768	0.703085
HRNR	13	0.417001	0.446289	0.751028
DHRS2	6	0.417234	0.15625	0.501417
COBL	25	0.417418	0.4266	0.723627
IQSEC3	7	0.417643	0.53125	0.799663
DACT2	12	0.41776	0.788086	0.929699
RGL3	17	0.417907	0.408791	0.719363
OR14A16	9	0.417975	0.367188	0.690612
CCSER1	22	0.418045	0.0164471	0.207454
CLIC5	8	0.418702	0.769531	0.922185
RLF	11	0.418912	0.350098	0.670067
BCAS3	9	0.419158	0.150391	0.501417
ADAMTSL3	16	0.419822	0.00654602	0.176898
PGBD1	7	0.42022	0.148438	0.501417
MSH5	6	0.420312	0.953125	1
BDNF	7	0.420319	0.234375	0.585439
ITSN2	22	0.420772	0.327819	0.663512
ZSCAN1	11	0.421523	0.711426	0.893763
PYHIN1	17	0.421763	0.463257	0.76405
HAS1	7	0.421821	0.40625	0.719363
FSD2	9	0.42218	0.248047	0.600982
SRL	6	0.422283	0.21875	0.57472
ZNF878	6	0.422601	0.15625	0.501417
NPR1	10	0.422733	0.422852	0.719363
HMHA1	10	0.422851	0.5	0.775107
LRRN4	9	0.422957	0.326172	0.662187
ADAMTS13	11	0.423107	0.949219	1
ZNF234	7	0.423453	0.533737	0.802375
FBXO10	6	0.424732	0.71875	0.893763
ZFP57	7	0.424952	0.851562	0.953785
ANKRD17	10	0.425699	0.0185547	0.220862
ZNF780B	13	0.425715	0.0471191	0.322187
KCNJ8	9	0.425852	0.849609	0.953785
CAMTA2	12	0.425932	0.574951	0.825309
ILDR1	9	0.426043	0.285156	0.624297
CES1	10	0.426558	0.000976562	0.0858272
HEATR2	10	0.42658	0.883789	0.97411
GRIN2C	13	0.426975	0.367676	0.690612
SLC9A1	6	0.427199	0.78125	0.92665
GFI1B	6	0.427473	0.28125	0.624249
YEATS2	8	0.428213	0.125	0.466205
TAF7L	7	0.428487	0.59375	0.831708
KRT28	12	0.428945	0.133057	0.490877
CALN1	8	0.429268	0.726562	0.898556
DBN1	6	0.429397	0.421875	0.719363
POGZ	7	0.429571	0.65625	0.858355
GBF1	16	0.429645	0.0326996	0.277107
SATB1	7	0.430007	0.710938	0.893763
ASXL2	11	0.430401	0.350098	0.670067
SLC7A1	6	0.430555	0.578125	0.825309
ADAMTSL1	18	0.43099	0.999477	1
SEMA7A	7	0.431293	0.46875	0.76405
ETV1	6	0.431741	0.578125	0.825309
KCNJ6	6	0.432146	0.921875	0.989422
FANCM	9	0.43215	0.326172	0.662187
PDE4A	6	0.432186	0.5	0.775107
OR2T33	6	0.432816	0.71875	0.893763
MSLN	7	0.432837	0.53125	0.799663
SIK1	6	0.433638	0.71875	0.893763
SLC12A7	9	0.433808	0.820312	0.945948
GALNT14	7	0.433813	0.960938	1
MON2	7	0.434169	0.148438	0.501417
MAP3K9	11	0.43429	0.449219	0.753746
SLC26A10	6	0.434356	0.921875	0.989422
KIF6	9	0.434695	0.5	0.775107
TRPC1	11	0.435157	0.13916	0.500517
SELL	9	0.435661	0.367188	0.690612
MAP4K2	6	0.435855	0.109375	0.439193
OR5L2	16	0.435944	0.46994	0.765356
BMPR2	10	0.436034	0.161133	0.508698
PLG	11	0.436224	0.817383	0.94563
ZNF582	8	0.437026	0.15625	0.501417
AP4B1	6	0.437094	0.921875	0.989422
TRPS1	10	0.437935	0.838867	0.953785
GAL3ST3	8	0.439027	0.0976562	0.433683
CCRL2	6	0.439507	0.078125	0.388207
KIF25	8	0.439657	0.0976562	0.433683
CATSPER1	11	0.439663	0.48291	0.775107
OR10Z1	14	0.439671	0.3349	0.663512
SEC14L3	9	0.439837	0.673828	0.87588
LPHN2	19	0.439847	0.024683	0.248057
PRAM1	9	0.439971	0.101562	0.439193
JAKMIP1	15	0.439972	0.114655	0.456492
IKBKAP	6	0.440811	0.84375	0.953785
MYO18B	57	0.441067	0.280957	0.624249
EFCAB6	13	0.441087	0.207153	0.57472
PADI6	6	0.441135	0.15625	0.501417
ARSA	7	0.44128	0.890625	0.97411
GMIP	9	0.441527	0.125	0.466205
CLCA4	7	0.442093	0.015625	0.204665
BRDT	11	0.442132	0.879883	0.973696
TKTL1	6	0.442149	0.921875	0.989422
OR2T1	13	0.442774	0.580322	0.827795
AASS	11	0.442999	0.13916	0.500517
NOD1	8	0.443027	0.769531	0.922185
DPPA2	7	0.443366	0.945312	1
DPP3	13	0.443505	0.095459	0.433683
FBP1	11	0.444337	0.896973	0.979313
STRA6	17	0.444483	0.626671	0.858355
C9orf43	7	0.444689	0.65625	0.858355
NLRC3	15	0.44471	0.380768	0.703085
RNF17	9	0.4457	0.150391	0.501417
MSI1	6	0.446453	0.421875	0.719363
SH3D19	10	0.446859	0.21582	0.57472
ATP2B3	17	0.447856	0.999924	1
DYSF	41	0.448269	0.35499	0.67729
DENND1C	9	0.448834	0.5	0.775107
KCNQ3	23	0.449156	0.623008	0.858355
PRKD2	7	0.449218	0.34375	0.663512
TSC1	11	0.449475	0.103027	0.439193
FUT8	10	0.449552	0.78418	0.928508
CASZ1	23	0.44976	0.56643	0.825309
XCR1	7	0.450138	0.710938	0.893763
PAPOLA	6	0.450214	0.015625	0.204665
ZFP14	7	0.450292	0.234375	0.585439
ZNF90	9	0.450962	0.212891	0.57472
PER3	6	0.451148	0.84375	0.953785
SLC12A3	13	0.451862	0.606567	0.847266
TSHZ2	9	0.452057	0.0644531	0.374502
EVI5L	8	0.452184	0.628906	0.858355
TRIM60	7	0.452346	0.34375	0.663512
PANX2	8	0.45248	0.679688	0.876181
SULT1A1	6	0.452519	0.03125	0.27245
BRD8	7	0.452551	0.17584	0.54133
DRD5	11	0.452718	0.48291	0.775107
PCDHA4	26	0.452841	0.862618	0.963969
AUP1	7	0.452861	0.0234375	0.246546
PPP1R9A	29	0.453288	0.0418378	0.302666
MCF2L	9	0.453865	0.951172	1
TAAR8	7	0.45397	0.40625	0.719363
NEFH	11	0.45444	0.879883	0.973696
CSRP2BP	9	0.454561	0.849609	0.953785
SLC30A10	8	0.454597	0.15625	0.501417
CAMKK1	7	0.454759	0.8125	0.941981
NLRP4	31	0.454838	0.0533125	0.334813
SYTL3	8	0.454892	0.0390625	0.297279
MURC	10	0.455043	0.21582	0.57472
PDE1C	17	0.45565	0.390953	0.712953
FAM71A	9	0.45605	0.367188	0.690612
LRSAM1	7	0.45684	0.46875	0.76405
GABRP	9	0.456925	0.285156	0.624297
RPS6KA2	11	0.456937	0.649902	0.858355
LRRC16A	6	0.457046	0.96875	1
ECM2	6	0.457124	0.21875	0.57472
SEMG1	6	0.457152	0.28125	0.624249
ZNF608	10	0.457569	0.137695	0.498871
OBP2B	6	0.457595	0.953125	1
PLAC1L	7	0.457891	0.078125	0.388207
RNF40	7	0.458115	0.34375	0.663512
OR2J2	10	0.458194	0.137695	0.498871
DMBT1	18	0.458564	0.0171165	0.211973
ZNF404	10	0.458635	0.3125	0.65494
NARS	6	0.459402	0.421875	0.719363
OR6C74	6	0.459498	0.109375	0.439193
FRMD3	8	0.459533	0.945312	1
CEP112	13	0.459588	0.248657	0.601391
PHLDB2	6	0.460195	0.421875	0.719363
PIP5K1B	8	0.460215	0.628906	0.858355
C5	7	0.460669	0.289062	0.624297
LAP3	6	0.460808	0.28125	0.624249
SPATA31C1	10	0.461053	0.8125	0.941981
SUSD5	12	0.461097	0.633301	0.858355
PREX2	22	0.461272	0.0880959	0.410116
BRAT1	10	0.462193	0.652344	0.858355
TERT	11	0.46231	0.382324	0.7031
SLCO1A2	13	0.462479	0.0635986	0.374502
C19orf21	13	0.463533	0.84729	0.953785
HSD17B3	6	0.463559	0.96875	1
NDNF	11	0.463652	0.103027	0.439193
MS4A8	11	0.463886	0.0161133	0.206758
PADI2	7	0.463998	0.0390625	0.297279
SGCZ	12	0.464397	0.830322	0.953785
SPATA18	6	0.464597	0.421875	0.719363
JPH3	8	0.465314	0.628906	0.858355
CNGB3	13	0.465476	0.0471191	0.322187
FBXO24	6	0.465531	0.28125	0.624249
SUPT5H	12	0.465652	0.973877	1
ZNF365	9	0.465702	0.00195312	0.112355
GPR124	13	0.465822	0.965942	1
TARP	8	0.465842	0.902344	0.980712
SCN4A	25	0.46634	0.237082	0.590161
CALCR	10	0.466887	0.0654297	0.374502
PACS1	13	0.467012	0.293945	0.629602
COLQ	7	0.467696	0.289062	0.624297
CALHM1	6	0.468203	0.578125	0.825309
BIVM-ERCC5	10	0.468521	0.0800781	0.390991
OBSL1	14	0.468975	0.0594482	0.360326
POLQ	20	0.468992	0.0526991	0.334813
ZNF441	7	0.469237	0.710938	0.893763
EGFR	7	0.46948	0.53125	0.799663
ZNF676	13	0.469535	0.0732422	0.388207
ATP1A1	6	0.469588	0.28125	0.624249
NCOR1	14	0.469594	0.0765381	0.388207
OR8G2	8	0.470141	0.472656	0.765356
HK2	10	0.470421	0.0966797	0.433683
MAGEC1	19	0.471005	0.998989	1
BMP5	9	0.471328	0.248047	0.600982
SP6	6	0.471807	0.65625	0.858355
UNC13A	24	0.472485	0.236583	0.589396
PRSS12	7	0.472584	0.65625	0.858355
ZIM3	14	0.472633	0.291504	0.627084
SEMG2	7	0.472705	0.46875	0.76405
AARS	7	0.473243	0.148438	0.501417
ZNF583	6	0.473304	0.5	0.775107
GPATCH8	8	0.473975	0.371094	0.69084
EMID1	6	0.474265	0.21875	0.57472
ATP2B2	12	0.47478	0.150635	0.501417
PRSS55	6	0.474883	0.578125	0.825309
DIP2A	11	0.475228	0.92627	0.9916
HSD3B7	6	0.476159	0.21875	0.57472
OSBPL3	7	0.476855	0.148438	0.501417
COL5A3	21	0.477031	0.0229964	0.246546
SYN3	9	0.477216	0.5	0.775107
CHST6	9	0.477404	0.849609	0.953785
TSNARE1	7	0.47759	0.0390625	0.297279
ABCC3	12	0.477712	0.150635	0.501417
UNC13D	11	0.477877	0.649902	0.858355
ZNF425	7	0.479022	0.234375	0.585439
NSMAF	8	0.479373	0.628906	0.858355
TUBA3C	12	0.479423	0.425049	0.721524
RGS12	15	0.479772	0.848602	0.953785
CAPN12	6	0.479926	0.84375	0.953785
FAM196B	8	0.480364	0.808594	0.941981
IQSEC1	8	0.480373	0.472656	0.765356
CPB1	8	0.480434	0.125	0.466205
EGF	12	0.480702	0.311035	0.65494
MUM1	7	0.480908	0.890625	0.97411
SLC22A11	12	0.480935	0.190186	0.548356
PCDHB10	8	0.481002	0.527344	0.799663
P2RX6	6	0.481023	0.953125	1
P4HA3	8	0.481126	0.320312	0.65542
LHX6	6	0.481306	0.34375	0.663512
TMEM232	7	0.48148	0.1875	0.548356
KDM6B	11	0.48156	0.879883	0.973696
ZNF285	17	0.481888	0.00395203	0.132114
CACNA1G	24	0.482075	0.067764	0.383036
ZNF646	14	0.482096	0.178772	0.546993
GAS7	7	0.482556	0.921875	0.989422
OR2L3	10	0.482578	0.1875	0.548356
VRK3	6	0.482937	0.21875	0.57472
PCF11	7	0.483185	0.59375	0.831708
TRIOBP	37	0.48335	0.158024	0.506293
SYCE1	9	0.483365	0.849609	0.953785
HRAS	8	0.483379	0.769531	0.922185
TBC1D5	6	0.483417	0.34375	0.663512
ZNF335	9	0.484299	0.150391	0.501417
COL28A1	16	0.484379	0.0167694	0.210061
C15orf55	9	0.484569	0.367188	0.690612
SEC14L4	8	0.484633	0.191406	0.548356
FLT4	13	0.484837	0.772583	0.925232
ANO1	9	0.485285	0.0488281	0.327263
GLRB	10	0.485306	0.27832	0.624249
FLT1	19	0.485673	0.297443	0.636594
TMEM139	6	0.485679	0.078125	0.388207
ACACB	19	0.4858	0.688719	0.883691
ARHGEF1	8	0.485839	0.578125	0.825309
CLEC4F	11	0.485911	0.232422	0.585439
MSH3	6	0.486108	0.109375	0.439193
PROSER1	11	0.486287	0.259766	0.621089
PCDHGB7	9	0.486317	0.972656	1
CHD2	6	0.486416	0.109375	0.439193
CYP2J2	6	0.486521	0.5	0.775107
LMTK2	16	0.486702	0.0369568	0.297279
ZNF541	12	0.487423	0.366699	0.690612
ZNF329	8	0.487554	0.421875	0.719363
GRXCR1	11	0.48786	0.13916	0.500517
LRCH4	10	0.488506	0.539062	0.8063
TP53BP2	9	0.488644	0.248047	0.600982
PLEKHG5	7	0.488793	0.921875	0.989422
OR4Q3	11	0.488932	0.120117	0.466205
PTCH2	11	0.488985	0.949219	1
EVC2	11	0.489064	0.318848	0.65542
PGLYRP2	11	0.48914	0.740234	0.911106
CELSR1	19	0.489386	0.570213	0.825309
MYO15A	33	0.489547	0.00986978	0.195565
KIF17	14	0.489724	0.0247192	0.248057
ZNF197	8	0.489866	0.628906	0.858355
DEPDC5	10	0.490198	0.137695	0.498871
MEPE	8	0.490205	0.679688	0.876181
KIF19	18	0.490263	0.162365	0.511995
DENND3	19	0.490362	0.688719	0.883691
CTNNA3	22	0.490631	0.00332475	0.13139
AK7	10	0.490708	0.3125	0.65494
ADAMTS7	21	0.490785	0.292701	0.628915
MYPN	14	0.4915	0.475769	0.769278
FAM71B	12	0.491565	0.116699	0.456492
ICA1	7	0.491859	0.46875	0.76405
PRB3	15	0.492331	0.0150757	0.204665
CPA3	11	0.492574	0.00683594	0.176898
GFRAL	9	0.4927	0.367188	0.690612
SLC45A3	9	0.492758	0.212891	0.57472
PAK6	6	0.493343	0.28125	0.624249
TBC1D17	6	0.493713	0.5	0.775107
UTRN	28	0.493724	0.398281	0.719363
CYP7B1	8	0.49426	0.320312	0.65542
SEMA6C	10	0.494606	0.958008	1
CYP8B1	11	0.494653	0.86084	0.962791
LAMB4	16	0.494697	0.92807	0.993137
IPO8	8	0.494748	0.320312	0.65542
CASS4	10	0.49522	0.00976562	0.194208
HTR3C	12	0.49525	0.633301	0.858355
ZBP1	6	0.495663	0.71875	0.893763
HTR3B	6	0.496009	0.84375	0.953785
POTEA	7	0.496158	0.765625	0.922185
CARD14	7	0.496549	0.765625	0.922185
ST6GALNAC1	6	0.497052	0.84375	0.953785
OR6T1	9	0.497132	0.285156	0.624297
ZNF334	18	0.497576	0.803631	0.941981
SLC6A19	12	0.497749	0.0646973	0.374502
C17orf70	11	0.497791	0.550781	0.812543
POPDC2	7	0.497823	0.53125	0.799663
C9	12	0.498319	0.0134277	0.204665
ZNF862	10	0.498484	0.5	0.775107
DPP6	17	0.498566	0.066185	0.378032
ZNF429	9	0.498609	0.0644531	0.374502
GIGYF1	8	0.498698	0.0976562	0.433683
PTPRH	10	0.499066	0.161133	0.508698
AKNA	8	0.499143	0.988281	1
APBA1	21	0.499377	0.353967	0.675812
TNC	15	0.499453	0.359863	0.684192
FAM149B1	6	0.499542	0.109375	0.439193
SPTAN1	13	0.500088	0.187866	0.548356
PCDH18	14	0.500339	0.0147705	0.204665
PZP	26	0.500432	0.420836	0.719363
PTPRM	27	0.500704	0.0131155	0.204665
ACD	10	0.5008	0.3125	0.65494
FLNB	17	0.500934	0.591209	0.831708
RAD51AP2	6	0.501283	0.578125	0.825309
COL14A1	23	0.501772	0.611607	0.85234
SPTLC2	9	0.501862	0.544922	0.80899
GPR179	33	0.501903	0.348993	0.670067
GALC	6	0.501956	0.03125	0.27245
CHL1	23	0.502263	0.365694	0.690612
RABL6	9	0.503332	0.898438	0.979313
RGS3	15	0.503688	0.619232	0.855123
PCDH8	10	0.50394	0.838867	0.953785
LIPC	8	0.504042	0.125	0.466205
PPP1R12C	7	0.504214	0.0234375	0.246546
ZNF132	6	0.50429	0.15625	0.501417
GPR61	7	0.504397	0.8125	0.941981
STRIP2	7	0.504509	0.34375	0.663512
CCDC27	19	0.504527	0.630955	0.858355
DRAXIN	7	0.504746	0.46875	0.76405
ARHGEF19	8	0.505712	0.371094	0.69084
ZC3H18	8	0.505736	0.0742188	0.388207
CLCN6	7	0.505915	0.289062	0.624297
PTPN14	8	0.506014	0.125	0.466205
AGTR1	9	0.506155	0.248047	0.600982
HDX	10	0.506299	1	1
URGCP	10	0.506387	0.21582	0.57472
PAK3	6	0.506412	0.984375	1
SNX25	7	0.50656	0.765625	0.922185
EHBP1L1	6	0.506643	0.34375	0.663512
SEMA3D	18	0.506962	0.000164032	0.0388613
CAPN6	12	0.506964	0.993896	1
GABRB3	26	0.507394	0.00213957	0.116585
ALPP	9	0.507719	0.0820312	0.393822
ATP9A	10	0.50772	0.838867	0.953785
VWA2	6	0.507792	0.21875	0.57472
LCT	17	0.507956	0.066185	0.378032
KIAA0556	16	0.507965	0.148926	0.501417
HPS4	9	0.508121	0.0820312	0.393822
MAMDC2	7	0.508466	0.890625	0.97411
CCDC129	25	0.508685	0.205383	0.57472
ARHGAP22	12	0.508833	0.953857	1
LMOD2	19	0.508867	0.585608	0.830983
DPEP3	10	0.509149	0.838867	0.953785
PRB4	17	0.509358	0.000839233	0.0858272
TMEM63B	7	0.509358	0.8125	0.941981
OVGP1	7	0.509591	0.289062	0.624297
IMPG1	12	0.509662	0.366699	0.690612
DNM2	6	0.509962	0.78125	0.92665
GTF2IRD1	10	0.510358	0.0322266	0.274808
IL18RAP	8	0.510702	0.320312	0.65542
IL17B	7	0.510762	0.851562	0.953785
KIAA1211L	9	0.51085	0.150391	0.501417
THSD7A	58	0.510887	0.000589228	0.0858272
MAGI1	8	0.511103	0.273438	0.624249
IL10RA	6	0.511582	0.5	0.775107
GGCX	8	0.511616	0.230469	0.585439
FPGT-TNNI3K	30	0.511874	0.619467	0.855123
CBLN3	7	0.51236	0.851562	0.953785
OR10C1	13	0.51274	0.0401611	0.300602
HSD17B4	6	0.513499	0.109375	0.439193
TRABD2A	13	0.51356	0.904541	0.981702
PAPPA	38	0.513626	0.998173	1
POLRMT	7	0.513806	0.148438	0.501417
POLE	7	0.513824	0.65625	0.858355
TRIM36	8	0.514099	0.527344	0.799663
FAM81B	6	0.514292	0.21875	0.57472
CNNM2	6	0.514305	0.21875	0.57472
ZNF735	14	0.514479	0.213135	0.57472
EPX	16	0.514869	0.609024	0.848989
NCKAP5L	19	0.515135	0.755016	0.920583
ADNP	8	0.515239	0.0976562	0.433683
MICAL2	9	0.51558	0.751953	0.920142
ACTRT2	9	0.51561	0.962891	1
HDAC9	18	0.515727	0.664738	0.866544
OR1N1	8	0.515834	0.769531	0.922185
RNF180	8	0.516039	0.578125	0.825309
FAT1	38	0.516067	0.717019	0.893763
EXOC6	6	0.516194	0.337071	0.663512
SEMA5B	25	0.516393	0.0742398	0.388207
LHX5	6	0.516772	0.28125	0.624249
ABCB8	12	0.516838	0.715332	0.893763
GRID2	24	0.516923	0.0302135	0.27245
DNMT1	16	0.516944	0.873886	0.970461
GC	7	0.517187	0.53125	0.799663
SHANK3	11	0.517282	0.817383	0.94563
SLCO5A1	16	0.517473	0.449966	0.754189
PLEKHG4B	23	0.517591	0.311034	0.65494
EPB41L3	12	0.517953	0.150635	0.501417
CD93	17	0.51821	0.857918	0.960311
FRYL	9	0.518298	0.285156	0.624297
RADIL	16	0.51834	0.550034	0.812543
COL5A1	29	0.518432	0.466064	0.76405
SPTBN5	31	0.51861	0.0847109	0.402081
NOTCH1	41	0.51861	0.998566	1
TLN1	15	0.51869	0.848602	0.953785
FER1L6	36	0.518823	0.78393	0.928508
ARHGEF12	9	0.518861	0.125	0.466205
MOV10L1	9	0.518884	0.875	0.970461
RAB3GAP2	10	0.519075	0.0136719	0.204665
KLHL22	6	0.519308	0.984375	1
DPCR1	22	0.51934	0.351192	0.671691
PRPF8	14	0.519396	0.903137	0.980712
E2F7	11	0.519499	0.232422	0.585439
ARID1A	9	0.519512	0.367188	0.690612
LTBP4	6	0.519591	0.5	0.775107
PHF12	7	0.519892	0.148438	0.501417
TMEM2	8	0.519901	0.972656	1
PALD1	6	0.519935	0.84375	0.953785
NOS3	16	0.520014	0.768127	0.922185
RFPL2	10	0.520385	0.0966797	0.433683
RBP3	21	0.520503	0.316648	0.65542
EXPH5	8	0.520546	0.421875	0.719363
C3AR1	7	0.520687	0.148438	0.501417
SLC2A4	7	0.520973	0.109375	0.439193
INTS1	20	0.52111	0.0318613	0.274808
THADA	7	0.521182	0.0234375	0.246546
R3HDM2	10	0.521622	0.246094	0.600982
KIAA1244	28	0.52189	0.158048	0.506293
LRRK1	19	0.522078	0.209021	0.57472
CCDC70	12	0.522091	0.234863	0.585439
SH2D3A	6	0.522198	0.21875	0.57472
COL13A1	13	0.522274	0.248657	0.601391
RERE	11	0.522727	0.995117	1
SPATA16	14	0.522941	0.120605	0.466205
SIDT1	11	0.523043	0.0209961	0.232406
LARS2	10	0.523347	0.90332	0.980712
ANO6	11	0.523528	0.382324	0.7031
CPAMD8	29	0.523687	0.424006	0.720876
BTN3A3	6	0.523791	0.28125	0.624249
CASC1	8	0.523856	0.320312	0.65542
ANO5	18	0.52397	0.5	0.775107
ANK1	18	0.524325	0.633137	0.858355
SYTL2	22	0.524325	0.0492053	0.328981
SLC6A16	7	0.524701	0.234375	0.585439
CCDC83	7	0.524835	0.078125	0.388207
MAS1L	8	0.524934	0.769531	0.922185
DDR2	13	0.524953	0.095459	0.433683
CPNE5	7	0.525035	0.1875	0.548356
SOX11	9	0.525075	0.5	0.775107
PSEN2	8	0.525387	0.875	0.970461
CEP128	9	0.52556	0.820312	0.945948
PDE1A	12	0.525615	0.0549316	0.334813
GPR50	8	0.526027	0.980469	1
NUP188	10	0.526162	0.384766	0.703789
SLC6A17	13	0.526275	0.945068	1
ACSBG1	11	0.526703	0.0336914	0.281297
TRPM6	30	0.526789	0.350016	0.670067
OR2M3	11	0.527697	0.350098	0.670067
AGBL3	8	0.527772	0.527344	0.799663
EP400	27	0.528314	0.634141	0.858355
TNXB	74	0.528641	0.618554	0.855023
OSGIN1	7	0.5287	0.710938	0.893763
PARP15	8	0.528833	0.0976562	0.433683
PIGR	9	0.528925	0.673828	0.87588
FLG2	26	0.529047	0.0203736	0.226994
FAM135B	59	0.52963	0.510538	0.790319
GPRC6A	26	0.529722	0.335486	0.663512
ALPI	9	0.530025	0.248047	0.600982
KIAA1109	31	0.53027	0.0110487	0.202709
CGNL1	20	0.530551	0.0526991	0.334813
OR52B4	7	0.530577	0.34375	0.663512
ABCA3	18	0.530724	0.584137	0.829589
NPY2R	11	0.531074	0.0874023	0.409154
OR4N2	14	0.531401	0.0122681	0.204665
NOL4	13	0.531601	0.0198975	0.223089
CHD7	19	0.531638	0.166033	0.51846
ZNF610	9	0.53171	0.589844	0.831708
USP33	8	0.531756	0.00390625	0.13139
PLCXD3	9	0.531908	0.150391	0.501417
IGF2BP1	10	0.532157	0.90332	0.980712
TMEM62	6	0.53226	0.015625	0.204665
SUSD2	9	0.532392	0.285156	0.624297
AMPD1	6	0.532419	0.15625	0.501417
RGS9	14	0.53281	0.427612	0.724296
POSTN	10	0.532935	0.0322266	0.274808
CATSPERD	6	0.533039	0.5	0.775107
GPR148	7	0.533418	0.765625	0.922185
KCNQ4	9	0.533527	0.179688	0.546993
RASGRF1	13	0.533566	0.095459	0.433683
VNN2	6	0.533653	0.71875	0.893763
PPP2R1A	9	0.533731	0.212891	0.57472
PCDHB13	11	0.533782	0.318848	0.65542
MAP2K3	8	0.533799	0.00390625	0.13139
SCARB1	8	0.534372	0.769531	0.922185
TARS	8	0.534683	0.125	0.466205
BRSK1	11	0.534911	0.0161133	0.206758
DENND1A	11	0.534957	0.896973	0.979313
MUC7	14	0.535084	0.5	0.775107
PRG4	7	0.53514	0.015625	0.204665
CTNND2	24	0.535153	0.282294	0.624297
SMYD1	8	0.535204	0.320312	0.65542
RAPGEF1	14	0.535451	0.291504	0.627084
TRPM3	36	0.535664	0.150015	0.501417
CHST3	7	0.535916	0.851562	0.953785
TAF3	6	0.535921	0.578125	0.825309
HUNK	9	0.535989	0.849609	0.953785
DENND6B	6	0.536337	0.28125	0.624249
ZNF713	8	0.53642	0.0742188	0.388207
NLRP9	25	0.536852	0.0822481	0.394516
LRRN3	15	0.537379	0.0534973	0.334813
SRGAP1	6	0.537492	0.078125	0.388207
SERPINA5	9	0.537685	0.0820312	0.393822
KDR	33	0.537805	0.0242145	0.246813
ADAM21	8	0.538015	0.0976562	0.433683
GAL3ST1	10	0.538324	0.615234	0.853683
ZMYM1	6	0.538377	0.28125	0.624249
PCDHAC1	12	0.538527	0.338623	0.663512
ABCC9	34	0.538558	0.0252199	0.251231
OR2F2	14	0.538651	0.312866	0.65494
WDR93	10	0.538896	0.137695	0.498871
SPTBN2	10	0.539403	0.577148	0.825309
SCML4	13	0.539542	0.227417	0.585439
MMRN1	13	0.539566	0.0838623	0.399446
PDE3A	21	0.539765	0.445866	0.751028
MGAT4A	7	0.5399	0.0390625	0.297279
TDRD6	14	0.54002	0.213135	0.57472
LONRF2	12	0.540201	0.311035	0.65494
CDH16	7	0.541233	0.992188	1
MFSD9	6	0.541479	0.15625	0.501417
DDX60L	12	0.541501	0.284668	0.624297
PAX4	9	0.541504	0.0488281	0.327263
DDB1	8	0.541622	0.0976562	0.433683
TBCD	8	0.541924	0.769531	0.922185
WDFY4	52	0.54199	0.458295	0.762054
NPR2	8	0.542381	0.875	0.970461
ABCA10	13	0.542446	0.15271	0.501417
SH3PXD2B	15	0.5425	0.906189	0.983238
KCNV1	16	0.542516	0.352859	0.674169
FAM189A1	6	0.54262	0.21875	0.57472
EPB41L4B	10	0.542708	0.1875	0.548356
HECW1	35	0.542893	0.388559	0.709537
PLEKHO2	8	0.543813	0.191406	0.548356
NPFFR2	16	0.544321	0.0124817	0.204665
KCTD19	10	0.544485	0.347656	0.668919
REG3A	14	0.544663	0.00427246	0.136417
NINL	12	0.544777	0.101807	0.439193
VWA5B1	24	0.545328	0.879734	0.973696
RFX4	6	0.545522	0.65625	0.858355
FBRS	7	0.545531	0.34375	0.663512
FMOD	9	0.545606	0.0820312	0.393822
GDF5	17	0.545625	0.103447	0.439193
SREBF2	13	0.545825	0.342407	0.663512
BBX	12	0.545877	0.234863	0.585439
OR5H2	7	0.546417	0.65625	0.858355
INPP5B	8	0.546702	0.230469	0.585439
WDFY3	17	0.546885	0.373329	0.69358
NOS2	12	0.54695	0.311035	0.65494
LIN7A	7	0.547035	0.109375	0.439193
DGKG	16	0.547047	0.00775146	0.176898
CNOT1	10	0.547786	0.0527344	0.334813
SNTB1	7	0.547841	0.234375	0.585439
PIK3AP1	11	0.547841	0.817383	0.94563
CTLA4	7	0.547997	0.234375	0.585439
CLIP1	13	0.548337	0.293945	0.629602
RPTOR	8	0.548498	0.679688	0.876181
ITGA7	16	0.548608	0.53006	0.799663
MICAL3	23	0.548638	0.827658	0.952864
COL11A2	40	0.548662	0.372302	0.69238
NEURL4	7	0.548732	0.921875	0.989422
CD33	8	0.549029	0.371094	0.69084
RET	13	0.549149	0.419678	0.719363
HUWE1	21	0.549187	0.999998	1
UPF1	13	0.549273	0.729126	0.900372
TIMM50	7	0.549753	0.945312	1
NTNG2	11	0.549787	0.958496	1
OR2M2	10	0.549816	0.652344	0.858355
FAM198A	9	0.550036	0.875	0.970461
ALMS1	28	0.550151	0.50447	0.781814
NKAPL	10	0.550383	0.422852	0.719363
IL1RL1	8	0.550591	0.0742188	0.388207
EHBP1	9	0.550615	0.179688	0.546993
GPR142	8	0.550685	0.230469	0.585439
BMP3	8	0.551132	0.0546875	0.334813
PCDHGA5	18	0.551171	0.633137	0.858355
SCIN	9	0.551377	0.875	0.970461
OCSTAMP	11	0.55178	0.232422	0.585439
LYST	29	0.551808	0.026688	0.253826
ATP2C2	14	0.551846	0.312866	0.65494
SHROOM2	12	0.55207	0.996582	1
GSN	6	0.552284	0.21875	0.57472
MLLT4	12	0.552344	0.259277	0.621089
RNF113B	6	0.552497	0.421875	0.719363
OR7D4	7	0.55257	0.851562	0.953785
RAB11FIP1	13	0.552644	0.945068	1
KIAA1549	29	0.552731	0.424006	0.720876
SLC24A5	14	0.5529	0.147888	0.501417
OR4K1	10	0.553068	0.00488281	0.151173
ABCA2	24	0.553355	0.946309	1
LRIF1	7	0.553382	0.234375	0.585439
GPR37L1	7	0.553418	0.0078125	0.176898
KLHL1	30	0.553429	0.244923	0.600982
GPC6	13	0.553464	0.936401	0.999305
ARMC4	12	0.554182	0.169678	0.526902
OR1L6	6	0.554649	0.65625	0.858355
FLG	65	0.55485	0.321331	0.657257
SLC36A2	6	0.554915	0.15625	0.501417
KHDRBS2	13	0.554932	0.317749	0.65542
NR2E3	7	0.555275	0.992188	1
LRFN2	13	0.555307	0.916138	0.989422
SMCR7	6	0.555335	0.71875	0.893763
PIK3C2G	9	0.555572	0.248047	0.600982
CCBL1	6	0.555601	0.15625	0.501417
ZNF331	6	0.555607	0.109375	0.439193
CHDC2	15	0.555729	0.992462	1
DOK1	7	0.556035	0.078125	0.388207
NPHP4	14	0.556043	0.59613	0.834184
ST6GAL2	15	0.556105	0.210602	0.57472
GMNC	7	0.556259	0.710938	0.893763
UBASH3B	6	0.556266	0.28125	0.624249
GPR144	6	0.556687	0.96875	1
ZNF114	6	0.557061	0.34375	0.663512
HCLS1	7	0.557126	0.1875	0.548356
DOK7	9	0.557203	0.150391	0.501417
PRR23A	13	0.557407	0.136719	0.498871
SYT3	16	0.557841	0.701706	0.893763
CD22	16	0.55837	0.352859	0.674169
ZSCAN10	14	0.558636	0.104587	0.439193
ARHGAP20	13	0.558903	0.0549316	0.334813
ADAM33	8	0.559279	0.0390625	0.297279
ZMYND15	9	0.559394	0.951172	1
SULF1	12	0.559531	0.515137	0.795404
PEAR1	10	0.559575	0.21582	0.57472
FFAR4	11	0.559714	0.0268555	0.253826
USP43	7	0.559739	0.65625	0.858355
C17orf47	9	0.560061	0.212891	0.57472
OR4D11	8	0.560118	0.0742188	0.388207
NBEAL1	14	0.560182	0.3349	0.663512
GAB1	6	0.560392	0.65625	0.858355
TAAR2	7	0.560404	0.65625	0.858355
KCNQ1	7	0.56079	0.53125	0.799663
OR4D1	8	0.560897	0.273438	0.624249
OTOP3	11	0.561133	0.51709	0.796163
TULP3	6	0.561163	0.21875	0.57472
AOAH	8	0.561207	0.0078125	0.176898
ZNF347	7	0.561529	0.34375	0.663512
KLHDC10	6	0.562109	0.71875	0.893763
POLR3A	12	0.562288	0.150635	0.501417
SALL1	35	0.562406	0.25068	0.604946
MUC6	14	0.562453	0.291504	0.627084
KIAA1199	12	0.562786	0.0549316	0.334813
GPR158	31	0.563001	0.0169049	0.210789
IL1B	7	0.563128	0.59375	0.831708
ZFYVE9	11	0.56324	0.0415039	0.302666
TMEM174	6	0.563372	0.65625	0.858355
ENTPD8	8	0.563376	0.125	0.466205
ASAP3	9	0.563806	0.0820312	0.393822
PTBP1	6	0.563815	0.5	0.775107
CYP4F2	6	0.563944	0.5	0.775107
DNAH10	62	0.564171	0.0217338	0.237329
MXRA5	14	0.564257	1	1
TREML2	10	0.564268	0.8125	0.941981
BEND4	11	0.564533	0.182617	0.548356
TRANK1	12	0.56481	0.338623	0.663512
KY	9	0.564871	0.0820312	0.393822
ARHGAP21	10	0.56499	0.116211	0.456492
CCDC148	8	0.565024	0.371094	0.69084
SGCA	6	0.565055	0.578125	0.825309
TEAD2	6	0.565085	0.65625	0.858355
DAGLA	20	0.565113	0.0199947	0.223261
ZHX1	7	0.565231	0.890625	0.97411
ANO8	7	0.565305	0.40625	0.719363
SLC8A3	28	0.565412	0.147299	0.501417
KNG1	12	0.565941	0.454834	0.757167
LHCGR	16	0.566231	0.105713	0.439193
OASL	8	0.566284	0.0546875	0.334813
PRDM16	16	0.5663	0.0193176	0.220862
MCM3AP	11	0.566311	0.0507812	0.334813
SLC4A9	7	0.566405	0.40625	0.719363
PLEKHG1	15	0.566455	0.151398	0.501417
ZKSCAN2	9	0.566455	0.248047	0.600982
LRRIQ4	14	0.566631	0.0863037	0.406807
DTNA	12	0.566917	0.0134277	0.204665
KIAA2018	19	0.56696	0.630955	0.858355
MAGEL2	25	0.56719	0.457902	0.761632
OR5F1	15	0.567239	0.00268555	0.126083
GRIA3	12	0.567424	0.999756	1
HNF1B	9	0.567433	0.179688	0.546993
C14orf39	16	0.567612	0.115601	0.456492
DHX57	11	0.567629	0.550781	0.812543
GCNT2	10	0.56805	0.0800781	0.390991
HGD	6	0.568351	0.578125	0.825309
FHDC1	14	0.568396	0.357422	0.681214
DNAH11	47	0.568777	0.305458	0.650172
ENTHD1	9	0.568856	0.589844	0.831708
MUC16	300	0.569103	2.38042e-08	2.16182e-05
ADAMTS14	7	0.569114	0.289062	0.624297
CLVS1	8	0.569569	0.945312	1
KLHL26	8	0.569666	0.679688	0.876181
OR5T1	8	0.569937	0.320312	0.65542
CASD1	10	0.570195	0.137695	0.498871
RPS6KA6	6	0.570329	1	1
PRMT8	10	0.57046	0.460938	0.763883
TMPRSS15	19	0.570553	0.755016	0.920583
PAX7	8	0.570627	0.769531	0.922185
DZANK1	6	0.570766	0.015625	0.204665
EP300	14	0.570776	0.932373	0.99735
LAMA5	27	0.570825	0.793374	0.933812
GART	6	0.570872	0.71875	0.893763
WDHD1	10	0.57144	0.0136719	0.204665
BRWD3	11	0.571561	0.997559	1
AHDC1	21	0.57159	0.83117	0.953785
ZSCAN12	8	0.571645	0.15625	0.501417
TECTA	25	0.571965	0.213071	0.57472
PNLIP	13	0.572035	0.84729	0.953785
GLRA1	11	0.572073	0.51709	0.796163
KIAA0226L	9	0.572106	0.544922	0.80899
EPHB2	9	0.572134	0.632812	0.858355
MAN2C1	8	0.572183	0.527344	0.799663
GABRA6	7	0.572184	0.148438	0.501417
GPR128	8	0.57227	0.0390625	0.297279
KRT14	17	0.572319	0.12175	0.466205
ENAM	15	0.572444	0.0318604	0.274808
CCDC73	11	0.572473	0.48291	0.775107
PKD2L2	7	0.572716	0.65625	0.858355
AKAP6	29	0.572822	0.710359	0.893763
CLIP3	6	0.57302	0.71875	0.893763
AATK	14	0.573114	0.59613	0.834184
ABL1	11	0.573219	0.997559	1
FLT3	12	0.573277	0.986572	1
ZIM2	16	0.573384	0.137222	0.498871
TCTN3	10	0.573552	0.0185547	0.220862
GPR37	11	0.573659	0.318848	0.65542
DNAH12	43	0.573738	0.299699	0.640009
ZNF599	7	0.573821	0.0546875	0.334813
PIK3CG	28	0.5739	0.261072	0.623392
EFCAB13	9	0.574146	0.285156	0.624297
ARHGEF15	17	0.574184	0.87825	0.97345
OR52E4	8	0.5744	0.320312	0.65542
PRKACG	9	0.574515	0.0273438	0.253826
NALCN	33	0.574537	0.725834	0.898556
ATG9A	6	0.574635	0.890625	0.97411
ACAN	38	0.574728	0.00478196	0.151173
FGD5	31	0.575137	0.0104544	0.198312
UCMA	6	0.575262	0.65625	0.858355
CD96	9	0.575279	0.150391	0.501417
MYO7A	29	0.575342	0.5	0.775107
CCDC62	6	0.57538	0.84375	0.953785
CRB2	7	0.575409	0.234375	0.585439
XKR6	11	0.575464	0.584473	0.829589
EPDR1	6	0.575553	0.28125	0.624249
EDNRB	13	0.57619	0.5	0.775107
GCNT1	18	0.576236	0.680153	0.876204
SVEP1	50	0.576384	0.473063	0.765356
SPHK2	6	0.576394	0.890625	0.97411
ANKRD12	12	0.576572	0.234863	0.585439
EDA	6	0.57673	1	1
SCN10A	40	0.57679	0.705012	0.893763
AMPH	24	0.576811	0.245399	0.600982
COL1A1	19	0.576934	0.702557	0.893763
TLL2	18	0.577046	0.173275	0.53555
FANCD2	8	0.577113	0.679688	0.876181
ACOT11	11	0.577203	0.817383	0.94563
DLL4	7	0.577593	0.710938	0.893763
ETS1	8	0.577723	0.191406	0.548356
KIF16B	9	0.577793	0.0644531	0.374502
MEGF11	6	0.577842	0.078125	0.388207
UNC5C	24	0.577848	0.606975	0.847618
TYRO3	6	0.577907	0.34375	0.663512
KCNJ4	7	0.577975	0.921875	0.989422
SUPT6H	9	0.578128	0.150391	0.501417
OR2M5	9	0.57818	0.632812	0.858355
SRRM2	26	0.578244	0.420836	0.719363
PCDHB11	12	0.578318	0.133057	0.490877
ATRNL1	19	0.578371	0.554716	0.81707
ZNF317	8	0.578706	0.679688	0.876181
DIRAS2	6	0.578706	0.34375	0.663512
VPS13D	33	0.578908	0.256742	0.618474
NOD2	14	0.57899	0.475769	0.769278
EPHA5	28	0.579165	0.175081	0.539298
PON1	8	0.57922	0.125	0.466205
DSPP	14	0.579265	0.108276	0.439193
RRP12	9	0.57927	0.248047	0.600982
BMX	6	0.579368	1	1
TLR4	31	0.579486	0.969688	1
PLXNA1	9	0.579733	0.248047	0.600982
DNM3	11	0.579942	0.767578	0.922185
SCUBE1	7	0.580039	0.976562	1
AQPEP	14	0.58021	0.0863037	0.406807
OR5D18	15	0.580357	0.165131	0.517125
TMC5	13	0.581172	0.473022	0.765356
TRIM67	10	0.581205	0.539062	0.8063
LCK	9	0.58137	0.150391	0.501417
FAM186A	26	0.581395	0.0552671	0.336481
VCAM1	18	0.581422	0.483059	0.775107
DSP	17	0.581628	0.939896	1
ABI3BP	7	0.582005	0.148438	0.501417
DLGAP1	23	0.582213	0.482156	0.775107
MUC5B	65	0.582239	0.109617	0.43984
OR13C9	10	0.582517	0.5	0.775107
PRSS57	6	0.582663	0.28125	0.624249
PLEKHG2	12	0.582773	0.515137	0.795404
FAM22F	7	0.582853	0.65625	0.858355
MAP4K1	12	0.582856	0.259277	0.621089
OR13C4	9	0.582966	0.714844	0.893763
ATM	10	0.583117	0.0966797	0.433683
TRAK1	8	0.583124	0.273438	0.624249
LINGO2	9	0.583183	0.962891	1
ACMSD	7	0.583188	0.46875	0.76405
FAR2	6	0.583311	0.421875	0.719363
ZIC1	8	0.583337	0.628906	0.858355
CCDC88B	22	0.583382	0.208483	0.57472
ERI3	6	0.583523	0.78125	0.92665
SVIL	16	0.583688	0.0253296	0.251863
STK10	7	0.58375	0.765625	0.922185
GCM2	8	0.583859	0.191406	0.548356
P2RX7	6	0.58414	0.578125	0.825309
FER1L5	25	0.584161	0.115181	0.456492
TTC3	13	0.584326	0.8302	0.953785
HIP1R	7	0.584786	0.34375	0.663512
IGF2BP3	10	0.584876	0.753906	0.920259
CHIT1	9	0.585001	0.125	0.466205
LRIG3	10	0.585079	0.615234	0.853683
SNX30	6	0.585091	0.21875	0.57472
SYNE1	79	0.585644	0.0073214	0.176898
PROX2	7	0.585733	0.289062	0.624297
GPR162	10	0.58599	0.5	0.775107
CLCA1	9	0.586074	0.179688	0.546993
PCLO	139	0.58614	7.96778e-06	0.00482405
PELP1	15	0.586584	0.103882	0.439193
ZNF554	6	0.586765	0.5	0.775107
RAD54B	6	0.586907	0.15625	0.501417
EPHA4	6	0.587001	0.21875	0.57472
CSF2RB	13	0.58704	0.342407	0.663512
ITGA8	32	0.587195	0.165462	0.517569
ADCY8	19	0.587232	0.813202	0.941993
PELI2	7	0.587327	0.710938	0.893763
C8A	13	0.587378	0.0838623	0.399446
SNRNP200	14	0.587496	0.250793	0.604946
PCDHGA4	19	0.587514	0.615997	0.854026
MAPK4	10	0.58762	0.78418	0.928508
MTBP	10	0.588101	0.137695	0.498871
DLGAP2	19	0.58832	0.755016	0.920583
GPR112	20	0.588366	0.999959	1
PTGS1	6	0.588457	0.578125	0.825309
SSPO	41	0.588504	0.45408	0.757167
WWC1	8	0.588583	0.0742188	0.388207
TET3	20	0.588632	0.727062	0.89897
ELTD1	22	0.588685	0.00704741	0.176898
CROCC	20	0.588727	0.378083	0.700978
HELZ2	23	0.58889	0.819804	0.945948
PYGM	9	0.58901	0.0820312	0.393822
DNAH1	31	0.589133	0.0239468	0.246763
GALNT10	7	0.589269	0.34375	0.663512
GALNT6	7	0.589314	0.46875	0.76405
B4GALNT1	6	0.589423	0.5	0.775107
RFC1	8	0.589571	0.273438	0.624249
PDE4DIP	37	0.589996	7.27596e-12	3.32257e-08
TOX3	10	0.590027	0.0800781	0.390991
C1orf94	7	0.590454	0.53125	0.799663
PITPNM2	7	0.590644	0.34375	0.663512
CYP4F11	7	0.590736	0.710938	0.893763
SNTG1	13	0.591085	0.187866	0.548356
CFHR1	6	0.591093	0.71875	0.893763
LRRC15	9	0.591628	0.714844	0.893763
MYO5A	13	0.591665	0.1698	0.526902
FMN2	76	0.592163	0.000140664	0.036499
CD163	32	0.592488	0.115615	0.456492
CLASP1	6	0.592495	0.578125	0.825309
OR13D1	9	0.592516	0.0488281	0.327263
OR2A14	8	0.592605	0.273438	0.624249
CR2	19	0.592687	0.615997	0.854026
PCSK6	10	0.592837	0.5	0.775107
MEP1A	12	0.592868	0.0385742	0.297279
PIK3CB	10	0.593035	0.00683594	0.176898
KLHDC7A	18	0.593047	0.0151825	0.204665
PCDHB5	20	0.59317	0.204549	0.57472
OTOP1	6	0.593702	0.078125	0.388207
OR2M7	13	0.593724	0.84729	0.953785
KIF3C	6	0.593738	0.65625	0.858355
GDF3	8	0.593741	0.679688	0.876181
COG4	7	0.59375	0.945312	1
PEAK1	13	0.593779	0.187866	0.548356
HPN	7	0.594032	0.890625	0.97411
PDZRN3	25	0.594132	0.183293	0.548356
ZNF536	54	0.59434	0.124297	0.466205
DNAH9	42	0.59436	0.775215	0.92665
ZFAT	13	0.594364	0.729126	0.900372
FAM5C	30	0.594642	0.403915	0.719363
PTPRZ1	14	0.59466	0.178772	0.546993
ADRA1D	7	0.59469	0.289062	0.624297
SOX30	8	0.594733	0.0546875	0.334813
APOBR	10	0.595107	0.975586	1
FRMD4B	8	0.595175	0.769531	0.922185
OR11A1	8	0.595341	0.527344	0.799663
TULP4	19	0.595467	0.0782013	0.388207
GCSAML	6	0.59551	0.578125	0.825309
BICD2	7	0.595553	0.0390625	0.297279
PHACTR3	7	0.595612	0.289062	0.624297
SORBS1	22	0.595667	0.436802	0.738026
ABCA12	12	0.595679	0.0212402	0.232406
CYLD	8	0.595793	0.0976562	0.433683
RASEF	14	0.595843	0.270813	0.624249
MPHOSPH8	7	0.595917	0.34375	0.663512
RELN	74	0.595975	0.00383021	0.13139
CEACAM20	8	0.596112	0.808594	0.941981
ZNF236	9	0.59621	0.248047	0.600982
OR4M1	8	0.596545	0.00390625	0.13139
HK1	6	0.596731	0.078125	0.388207
TRIM10	8	0.596882	0.726562	0.898556
ZNF700	7	0.596882	0.34375	0.663512
DLEC1	21	0.596926	0.196292	0.559804
PRDM5	12	0.597002	0.211914	0.57472
KCNA6	17	0.59706	0.0601044	0.3617
ZNF782	10	0.597104	0.862305	0.963836
PTK2B	11	0.597211	0.550781	0.812543
PLIN1	9	0.597268	0.714844	0.893763
AKAP3	11	0.597276	0.0415039	0.302666
VARS	14	0.597494	0.195496	0.558018
ADAMTS18	23	0.597812	0.34344	0.663512
ZNF454	9	0.597944	0.544922	0.80899
AGMO	7	0.598018	0.289062	0.624297
HNF4A	10	0.598159	0.652344	0.858355
SPHKAP	56	0.598626	0.279869	0.624249
KIAA1755	23	0.598663	0.602006	0.841542
MOGAT2	6	0.59869	0.015625	0.204665
TDP1	8	0.598718	0.0078125	0.176898
FRS3	8	0.598791	0.125	0.466205
SMAD3	6	0.598967	0.015625	0.204665
INF2	11	0.598972	0.896973	0.979313
MS4A14	19	0.599044	0.0520782	0.334813
C20orf194	9	0.5992	0.101562	0.439193
LRFN1	6	0.5994	0.21875	0.57472
GRB7	6	0.599414	0.078125	0.388207
ZFHX3	24	0.599439	0.227937	0.585439
KCNT2	20	0.599582	0.507282	0.785502
MTSS1L	7	0.599794	0.960938	1
PHACTR1	8	0.599869	0.769531	0.922185
ADCY10	12	0.599941	0.366699	0.690612
PRMT7	6	0.600108	0.28125	0.624249
STK31	14	0.60031	0.548401	0.812462
KPRP	6	0.6005	0.421875	0.719363
GCKR	11	0.600615	0.382324	0.7031
KIF7	11	0.600626	0.0507812	0.334813
CDH13	10	0.600721	0.652344	0.858355
BANK1	11	0.600775	0.0874023	0.409154
SCG2	16	0.600833	0.647141	0.858355
ITGA10	7	0.600855	0.234375	0.585439
TCF20	28	0.600985	0.857893	0.960311
CSMD2	68	0.601091	0.358091	0.68225
COL4A3	28	0.601218	0.0599857	0.3617
SCN11A	31	0.601306	0.831546	0.953785
SPNS3	7	0.601318	0.59375	0.831708
AGO3	7	0.601471	0.8125	0.941981
TDRD9	14	0.601551	0.147888	0.501417
SELPLG	6	0.601642	0.15625	0.501417
TUBB4A	9	0.601699	0.455078	0.757167
SLC8A2	6	0.601717	0.34375	0.663512
PCDHB14	9	0.601745	0.101562	0.439193
LEF1	6	0.601804	0.078125	0.388207
CCNB3	13	0.601854	0.998779	1
RHOH	6	0.602184	0.5	0.775107
CNBD1	11	0.602241	0.259766	0.621089
LILRA1	23	0.602299	0.0224379	0.244211
VWCE	14	0.602543	0.0968628	0.433683
SLC7A7	6	0.602567	0.578125	0.825309
ANKK1	8	0.602592	0.578125	0.825309
OR6C1	8	0.602621	0.628906	0.858355
GREM2	8	0.60273	0.0390625	0.297279
TCTE1	16	0.602816	0.087677	0.409736
TJP3	10	0.602893	0.883789	0.97411
SPTB	34	0.603093	0.57363	0.825309
PCDHA3	28	0.60316	0.45095	0.755604
CHRM2	21	0.60318	0.236667	0.589396
ZNF648	7	0.603205	0.53125	0.799663
MAST4	21	0.603312	0.594161	0.831956
SOHLH1	6	0.603343	0.28125	0.624249
MYO1G	10	0.603507	0.246094	0.600982
BPIFB6	7	0.603512	0.65625	0.858355
LIG1	9	0.603549	0.248047	0.600982
ANXA13	12	0.603628	0.633301	0.858355
CCKAR	9	0.603641	0.150391	0.501417
DGKB	30	0.60381	0.036622	0.297279
RYR1	94	0.603834	0.000993498	0.0859297
GRIK4	9	0.603857	0.212891	0.57472
SIGLEC7	15	0.603942	0.299744	0.640009
PRRC2B	17	0.603978	0.408791	0.719363
SETBP1	15	0.604012	0.380768	0.703085
RTN4RL1	9	0.604073	0.980469	1
GRM7	18	0.60413	0.275436	0.624249
TENC1	7	0.604295	0.8125	0.941981
ELMSAN1	12	0.604575	0.101807	0.439193
ANKRD18A	8	0.604706	0.980469	1
ZNF746	7	0.604798	0.945312	1
SCNN1A	9	0.605028	0.917969	0.989422
SHROOM1	6	0.605079	0.984375	1
CENPE	8	0.605257	0.0742188	0.388207
USP20	7	0.605406	0.710938	0.893763
DUXA	8	0.60547	0.875	0.970461
MKRN3	18	0.605951	0.261307	0.62368
COL6A3	58	0.60605	0.700723	0.893763
FMN1	15	0.606053	0.820435	0.945948
KDM4D	7	0.606234	0.960938	1
LLGL1	9	0.606258	0.326172	0.662187
TMC2	19	0.606325	0.061594	0.367205
OR4C12	9	0.606347	0.248047	0.600982
CCDC66	7	0.606394	0.109375	0.439193
KRT83	8	0.606588	0.0390625	0.297279
KIDINS220	12	0.606655	0.924316	0.991467
ZNF560	12	0.606683	0.0212402	0.232406
PHKA2	8	0.606699	0.996094	1
CPZ	11	0.606931	0.958496	1
PCDH17	43	0.607024	0.353239	0.674657
TTLL2	6	0.607062	0.71875	0.893763
FAM131C	6	0.607143	0.109375	0.439193
ARSI	9	0.607211	0.0820312	0.393822
PKD2	9	0.607293	0.962891	1
C1orf168	8	0.607299	0.808594	0.941981
SLC12A1	21	0.607372	0.00355053	0.13139
QRFPR	13	0.607418	0.121948	0.466205
PTGIR	10	0.607494	0.460938	0.763883
ZNF679	13	0.607514	0.553711	0.816334
ABCC5	13	0.607613	0.0107422	0.198312
ZNF382	13	0.607888	0.5	0.775107
PRKCQ	10	0.607907	0.0527344	0.334813
TSHR	16	0.607978	0.550034	0.812543
PCDH9	39	0.608001	0.0855668	0.405438
HTR5A	13	0.608127	0.1698	0.526902
ADAM15	8	0.608135	0.421875	0.719363
GUCY1A3	16	0.608269	0.410446	0.719363
ANKRD34C	14	0.608497	0.0338135	0.281297
DNAJC16	7	0.608575	0.148438	0.501417
ZNF341	9	0.608665	0.589844	0.831708
AKT3	6	0.60869	0.21875	0.57472
PPP1R13L	11	0.608747	0.711426	0.893763
BCAN	14	0.609093	0.619568	0.855123
HBB	7	0.609428	0.53125	0.799663
PARD3B	21	0.609446	0.445866	0.751028
RB1CC1	7	0.609509	0.0390625	0.297279
PATL2	11	0.609622	0.617676	0.854026
COL19A1	45	0.609643	0.00107065	0.0911554
CCDC64B	6	0.609742	0.34375	0.663512
NLRP8	30	0.609786	0.0236295	0.246763
SPATA31D1	39	0.609898	0.748637	0.920142
POTEE	10	0.610072	0.000976562	0.0858272
KREMEN1	7	0.610184	0.46875	0.76405
ZSCAN20	8	0.610281	0.960938	1
STK36	19	0.610299	0.039938	0.300602
FGF23	7	0.610371	0.53125	0.799663
TNS3	18	0.610659	0.383015	0.703789
DCLK1	28	0.610844	0.0238736	0.246763
SLITRK1	10	0.610879	0.384766	0.703789
HDAC4	12	0.611138	0.190186	0.548356
SHC2	7	0.611321	0.1875	0.548356
FCRL1	10	0.611339	0.0800781	0.390991
OR14I1	7	0.611684	0.890625	0.97411
GGN	8	0.611686	0.0742188	0.388207
AKAP9	13	0.611875	0.473022	0.765356
FAM118A	6	0.612029	0.78125	0.92665
ZMYM4	6	0.61206	0.28125	0.624249
FAM179A	16	0.612334	0.37178	0.691646
METTL11B	7	0.612421	0.0234375	0.246546
TNIK	26	0.612491	0.170166	0.527736
ARHGEF25	9	0.612514	0.248047	0.600982
KRT3	11	0.612589	0.206543	0.57472
ZNF772	8	0.612822	0.191406	0.548356
PLEKHG3	11	0.612948	0.617676	0.854026
CA8	11	0.613221	0.382324	0.7031
DACH1	16	0.613259	0.449966	0.754189
LECT1	7	0.613646	0.40625	0.719363
USP42	11	0.613647	0.711426	0.893763
ZFR2	9	0.613847	0.986328	1
CACNA1E	54	0.613862	0.371763	0.691646
C3	23	0.613914	0.376992	0.699432
ATXN7	6	0.61399	0.65625	0.858355
ADAMTS15	10	0.613999	0.78418	0.928508
MROH7	17	0.614421	0.761201	0.922185
FAM5B	23	0.614451	0.786291	0.929352
DMGDH	7	0.614459	0.0078125	0.176898
COL22A1	60	0.61461	0.820303	0.945948
ZAR1L	11	0.614624	0.0507812	0.334813
FOXRED2	8	0.614641	0.902344	0.980712
HK3	13	0.614702	0.0401611	0.300602
FGF21	7	0.614795	0.890625	0.97411
ZNF534	24	0.615063	0.000618994	0.0858272
TIAM1	12	0.615115	0.866943	0.967433
OR2T2	11	0.615248	0.000976562	0.0858272
STX11	8	0.615314	0.421875	0.719363
SLC43A3	8	0.615355	0.0273438	0.253826
OR5B17	6	0.615367	0.28125	0.624249
NPAS3	6	0.615387	0.71875	0.893763
SCARF1	9	0.615402	0.248047	0.600982
ATP7B	14	0.61554	0.786865	0.929352
ARHGEF28	7	0.615542	0.148438	0.501417
NCKAP1L	8	0.615769	0.527344	0.799663
CAPN9	11	0.615891	0.51709	0.796163
COL2A1	22	0.616012	0.173207	0.53555
LBP	9	0.616102	0.0820312	0.393822
TOPAZ1	24	0.616117	0.626537	0.858355
ACCSL	7	0.616159	0.65625	0.858355
KHDRBS3	14	0.616292	0.231567	0.585439
GYS2	10	0.61641	0.0654297	0.374502
FBN3	34	0.616437	0.318149	0.65542
PMFBP1	9	0.616444	0.00585938	0.174468
TFAP2B	11	0.616585	0.0268555	0.253826
MGRN1	7	0.616848	0.34375	0.663512
DNAH2	40	0.616974	0.843096	0.953785
KIAA1751	12	0.617106	0.484863	0.775107
VWA8	19	0.6173	0.311281	0.65494
CUBN	75	0.61735	0.0161263	0.206758
C15orf39	8	0.617641	0.320312	0.65542
FAM171A1	19	0.6178	0.0909328	0.421281
RPRD2	15	0.618016	0.00335693	0.13139
MCF2	20	0.618245	0.999895	1
FAM83H	8	0.618326	0.925781	0.991467
FAM83C	9	0.61853	0.5	0.775107
ZFP82	10	0.618917	0.0322266	0.274808
CSMD1	126	0.619141	0.998582	1
HERC6	11	0.619215	0.0161133	0.206758
CACNG3	8	0.619401	0.679688	0.876181
MAPK13	6	0.619402	0.109375	0.439193
SLC27A2	8	0.619649	0.472656	0.765356
MATK	8	0.619689	0.421875	0.719363
EFCAB12	11	0.619696	0.0336914	0.281297
CDC42BPB	11	0.620191	0.48291	0.775107
CCDC57	6	0.620402	0.421875	0.719363
GFAP	6	0.620753	0.421875	0.719363
AGPAT6	6	0.620793	0.34375	0.663512
NLRP3	22	0.620802	0.0779853	0.388207
SALL3	21	0.621013	0.980781	1
UBQLN4	8	0.621027	0.726562	0.898556
SPATA31E1	25	0.621094	0.904593	0.981702
ATAD5	6	0.62123	0.28125	0.624249
F13A1	18	0.621614	0.710079	0.893763
GALNT8	6	0.621618	0.015625	0.204665
SORCS3	41	0.62181	0.063595	0.374502
NPAP1	44	0.621975	0.190951	0.548356
PER2	16	0.622043	0.242531	0.600982
GRM5	20	0.622077	0.101225	0.439193
ARHGAP29	11	0.622245	0.160156	0.508698
RFPL4B	8	0.622269	0.769531	0.922185
CAD	20	0.622299	0.0119753	0.204665
NRG3	15	0.622312	0.0318604	0.274808
LILRA2	25	0.622433	0.0137397	0.204665
DOCK4	35	0.622603	0.000921438	0.0858272
ARHGEF33	6	0.622635	0.421875	0.719363
C2CD3	7	0.622676	0.234375	0.585439
DOT1L	9	0.622944	0.326172	0.662187
SENP7	16	0.623002	0.000152588	0.0377932
F13B	8	0.623139	0.230469	0.585439
MMP27	8	0.62323	0.578125	0.825309
TSPYL6	6	0.623305	0.78125	0.92665
ANGPTL7	7	0.623307	0.960938	1
RGAG1	16	0.623331	0.998657	1
FOXN4	11	0.623353	0.584473	0.829589
ZNF716	10	0.623368	0.116211	0.456492
PPP2R2B	6	0.623439	0.28125	0.624249
SCAF8	6	0.62362	0.78125	0.92665
NOTCH3	23	0.623728	0.3325	0.663512
PFAS	17	0.623913	0.273834	0.624249
KIAA1024	20	0.623929	0.101225	0.439193
NOBOX	8	0.623999	0.0546875	0.334813
COLGALT2	12	0.624185	0.101807	0.439193
PTH1R	7	0.624317	0.960938	1
NACAD	17	0.624349	0.289528	0.62456
BCL2L12	8	0.624399	0.578125	0.825309
ZNF592	7	0.624406	0.1875	0.548356
CACNA1S	31	0.624508	0.19419	0.556039
THSD4	7	0.624606	0.148438	0.501417
HECTD4	31	0.624707	0.264703	0.624249
BAI1	12	0.624861	0.98291	1
CTC1	11	0.624963	0.318848	0.65542
DHTKD1	7	0.625497	0.46875	0.76405
PCDHGB2	15	0.625533	0.640137	0.858355
ZNF845	12	0.625631	0.0461426	0.322187
USP7	8	0.625638	0.808594	0.941981
PARD3	18	0.6257	0.0907326	0.420767
DBX2	11	0.625797	0.00341797	0.13139
KCNT1	20	0.625911	0.96521	1
EPB41L2	11	0.62598	0.0737305	0.388207
TP63	6	0.626203	0.015625	0.204665
KIAA1614	10	0.62627	0.967773	1
FGD2	12	0.626487	0.574951	0.825309
DMBX1	8	0.626508	0.679688	0.876181
OR4F6	7	0.626772	0.8125	0.941981
SULT2B1	8	0.626819	0.273438	0.624249
KIT	12	0.626928	0.169678	0.526902
ARAP2	11	0.626949	0.48291	0.775107
SIPA1L1	16	0.626953	0.735916	0.907652
CHRNB3	8	0.627053	0.726562	0.898556
HCN1	34	0.627106	0.0204124	0.226994
SAMD9L	24	0.62728	0.291903	0.627448
CYP4F3	7	0.627354	0.0390625	0.297279
RALGAPA2	14	0.627613	0.3349	0.663512
PTCHD2	26	0.627664	0.976834	1
CCM2L	6	0.627682	0.421875	0.719363
SIGLEC6	11	0.627727	0.649902	0.858355
SYT10	8	0.627843	0.125	0.466205
ACAP2	9	0.627973	0.0820312	0.393822
INPPL1	8	0.628214	0.0273438	0.253826
EVPL	9	0.628317	0.632812	0.858355
CMYA5	35	0.628481	0.115899	0.456492
SDK1	23	0.628494	0.50595	0.783661
CACNA1F	25	0.628539	0.999995	1
TPO	29	0.628739	0.0182677	0.220862
STK40	8	0.628826	0.769531	0.922185
ATP4A	15	0.628861	0.210602	0.57472
ABCG1	8	0.629057	0.726562	0.898556
CCDC168	100	0.629105	0.0707965	0.388207
PRR12	16	0.629183	0.912323	0.989422
TNK2	10	0.629243	0.21582	0.57472
LEPR	23	0.629277	0.300523	0.64092
PCNXL2	12	0.629331	0.190186	0.548356
CTCFL	7	0.629406	0.710938	0.893763
IQGAP3	12	0.629417	0.311035	0.65494
ITPR1	29	0.629871	0.717635	0.893763
OR52N2	6	0.629903	0.34375	0.663512
LIMCH1	11	0.629952	0.48291	0.775107
PLXNA4	26	0.630003	0.25765	0.620114
CREBBP	24	0.630088	0.594232	0.831956
ABR	10	0.630211	0.5	0.775107
CYP2C18	12	0.630308	0.284668	0.624297
MAG	10	0.630316	0.384766	0.703789
NUMA1	14	0.630331	0.178772	0.546993
ANK2	59	0.630431	0.00219036	0.117012
PARM1	7	0.631077	0.148438	0.501417
ZMYM2	8	0.63135	0.808594	0.941981
TRPA1	20	0.631475	0.0242205	0.246813
ZNF208	27	0.631507	0.124169	0.466205
SUSD1	6	0.631586	0.34375	0.663512
FNIP2	6	0.631697	0.15625	0.501417
ALLC	6	0.631701	0.015625	0.204665
OR6N1	8	0.631798	0.679688	0.876181
ITGAL	18	0.631904	0.664738	0.866544
TARS2	9	0.632025	0.544922	0.80899
DNAH17	67	0.632205	0.030251	0.27245
KIF1B	11	0.632335	0.120117	0.466205
OPLAH	18	0.632388	0.600647	0.839858
41704	6	0.632433	0.21875	0.57472
LRP12	8	0.632463	0.902344	0.980712
ZFP28	17	0.632539	0.0871277	0.409154
TTC28	23	0.632649	0.311034	0.65494
RBFOX1	11	0.632779	0.617676	0.854026
PPFIA1	7	0.632934	0.0390625	0.297279
SPPL2C	12	0.633119	0.338623	0.663512
OR10K1	9	0.633184	0.714844	0.893763
PHF3	11	0.633243	0.00683594	0.176898
ASB10	12	0.633345	0.866943	0.967433
COL27A1	16	0.633457	0.62822	0.858355
PCDHGA11	14	0.633468	0.913696	0.989422
ZC3H7B	10	0.63358	0.21582	0.57472
TOP2A	10	0.633622	0.161133	0.508698
PCDHGB5	9	0.633666	0.150391	0.501417
KCNMA1	19	0.633707	0.166033	0.51846
OR4K14	10	0.633721	0.161133	0.508698
TICRR	11	0.63388	0.896973	0.979313
C4BPA	9	0.633882	0.00195312	0.112355
OR1M1	7	0.634074	0.765625	0.922185
BIRC6	17	0.634119	0.0871277	0.409154
ARHGAP17	11	0.634247	0.350098	0.670067
MYO5B	21	0.634258	0.432444	0.731475
CRIM1	8	0.63432	0.371094	0.69084
PCDHGA8	11	0.634358	0.206543	0.57472
KNDC1	21	0.634903	0.0323248	0.275215
PCDHB12	13	0.634915	0.00854492	0.186993
AHNAK2	72	0.635001	0.561322	0.825309
KCNC2	16	0.635297	0.935135	0.998784
POLR2A	11	0.6353	0.617676	0.854026
SCRIB	16	0.635688	0.609024	0.848989
CAPN5	10	0.635841	0.5	0.775107
CUL9	15	0.635932	0.532959	0.80173
PCDHA5	21	0.636123	0.366735	0.690612
BRCA2	11	0.636154	0.51709	0.796163
OAS3	6	0.636204	0.078125	0.388207
DZIP1	10	0.636296	0.246094	0.600982
CRHBP	9	0.636468	0.0488281	0.327263
HIRA	9	0.636508	0.632812	0.858355
GALNT12	6	0.636876	0.5	0.775107
ARHGAP36	8	0.63688	0.996094	1
MFSD5	6	0.636898	0.15625	0.501417
NXPE1	9	0.636999	0.410156	0.719363
ATP1A3	19	0.637032	0.244984	0.600982
LRRC36	13	0.637082	0.108154	0.439193
SPEG	28	0.637273	0.824919	0.950313
DCAF5	13	0.637283	0.317749	0.65542
MGAT5B	20	0.637294	0.310757	0.65494
ANO2	25	0.637316	0.06682	0.380798
KIAA1804	10	0.637347	0.753906	0.920259
ESPL1	17	0.637621	0.677933	0.876181
CD1E	21	0.637731	0.0686417	0.387193
PHF20L1	15	0.63776	0.640137	0.858355
ASTN2	27	0.637817	0.998905	1
PCDHB2	11	0.637866	0.550781	0.812543
PARK2	11	0.637886	0.350098	0.670067
RXFP2	18	0.637977	0.335262	0.663512
SLMAP	7	0.638003	0.765625	0.922185
BTN2A2	8	0.63805	0.320312	0.65542
CEP290	16	0.63825	0.041626	0.302666
IGFN1	24	0.638282	0.0282133	0.260567
SLC26A9	21	0.638324	0.281037	0.624249
OR6C2	8	0.638531	0.371094	0.69084
CACNA1C	52	0.638729	0.0910752	0.421281
KIAA2022	21	0.638744	1	1
TRPM1	20	0.638761	0.00242996	0.119849
FAM227A	6	0.638761	0.21875	0.57472
FCHO1	7	0.638942	0.59375	0.831708
PCDHA6	19	0.639199	0.0129108	0.204665
ANGPT4	8	0.639214	0.472656	0.765356
FAM179B	10	0.639225	0.21582	0.57472
ZNF219	8	0.639357	0.00390625	0.13139
REG3G	10	0.63941	0.1875	0.548356
COL1A2	57	0.639419	0.000516519	0.0827798
ZZEF1	20	0.63956	0.550841	0.812543
LCTL	6	0.639589	0.21875	0.57472
KLHL38	12	0.639623	0.211914	0.57472
PKHD1L1	90	0.63972	0.373766	0.694155
HYDIN	45	0.639726	0.110444	0.442834
OR13C8	6	0.639804	0.421875	0.719363
IL1RAPL1	16	0.639875	0.999847	1
EPHA7	32	0.639902	0.029773	0.272203
TSKS	7	0.639918	0.851562	0.953785
PCDHB6	20	0.639928	0.662889	0.864755
MYBPC2	18	0.640139	0.0192451	0.220862
LRP1	38	0.640238	0.87841	0.97345
CILP	17	0.640248	0.661148	0.862989
MYEF2	10	0.640353	0.246094	0.600982
OTOF	35	0.640367	0.893469	0.977024
SSC5D	13	0.640484	0.342407	0.663512
SLC4A4	23	0.640587	0.634306	0.858355
TYR	11	0.640753	0.0615234	0.367186
LRRN2	8	0.640968	0.769531	0.922185
CLCN3	7	0.641025	0.65625	0.858355
TMPRSS9	6	0.641128	0.78125	0.92665
TTLL5	11	0.641208	0.617676	0.854026
PCDH10	10	0.641219	0.5	0.775107
PTPRO	24	0.641264	0.00157154	0.109556
ULK2	6	0.64134	0.34375	0.663512
MLL2	74	0.641901	0.0961661	0.433683
SLC4A5	18	0.641955	0.0448837	0.32012
TPTE	39	0.64198	1.81899e-11	3.32257e-08
LAMA3	25	0.642115	0.710897	0.893763
IGSF1	14	0.642129	0.99939	1
ANGPT1	12	0.642163	0.484863	0.775107
APBB1	12	0.642326	0.633301	0.858355
TENM4	29	0.642564	0.342787	0.663512
MKL2	9	0.642643	0.544922	0.80899
TXNDC16	6	0.6428	0.046875	0.322187
CYFIP1	9	0.642872	0.326172	0.662187
OR4A16	6	0.642934	0.15625	0.501417
COL4A6	15	0.642996	0.999969	1
ABCC11	22	0.643018	0.00372171	0.13139
OR4K17	12	0.643083	0.00805664	0.179921
TECPR1	17	0.643205	0.426819	0.723627
ITGA9	9	0.643305	0.410156	0.719363
NBPF7	6	0.643353	0.28125	0.624249
ZNF205	7	0.643495	0.289062	0.624297
ANKRD13D	6	0.643634	0.34375	0.663512
ZNF470	9	0.643668	0.875	0.970461
BEND6	6	0.643693	0.28125	0.624249
GPR83	6	0.643696	0.578125	0.825309
ADAMTS6	15	0.643743	0.737762	0.909723
RASAL1	10	0.64381	0.21582	0.57472
SYMPK	10	0.643844	0.652344	0.858355
SBNO2	8	0.643973	0.320312	0.65542
TANC1	15	0.644032	0.789398	0.931046
RGPD3	7	0.644035	0.0078125	0.176898
FAT3	100	0.644368	0.0853164	0.404603
41702	8	0.644442	0.527344	0.799663
MYRIP	8	0.644464	0.230469	0.585439
F5	27	0.644491	0.0159479	0.206758
MAP1A	31	0.644533	0.00742604	0.176898
PHIP	8	0.644604	0.0273438	0.253826
IQCH	9	0.644646	0.0488281	0.327263
ZNF318	15	0.644692	0.067688	0.383003
[truncated: 3,451 more rows]

## Sheet: Table S7
Supplemental Table S7: MutSig analysis
gene	expr	reptime	hic	N_nonsilent	N_silent	N_noncoding	n_nonsilent	n_silent	n_noncoding	nnei	x	X	p	q
TP53	2069567	213	34	120471	33267	209079	56	5	4	16	57	2434614	0	0
CDKN2A	225405	357	-15	93015	24219	53001	19	0	3	4	11	352443	9.89943e-11	9.33615e-07
PEG10	393749	462	4	273702	2652	8541	10	1	21	0	22	11193	5.8279e-10	3.6642e-06
NOTCH2	429750	510	14	695682	187434	776880	34	6	11	8	46	3312894	3.92713e-07	0.00185184
NOTCH1	1489379	212	43	711438	201162	338130	40	8	7	10	85	3595137	6.22045e-06	0.02098
HRAS	1970020	236	42	60255	16848	68679	9	1	1	50	328	11194482	7.74778e-06	0.02098
BBS9	233203	759	-6	254124	67860	546156	10	5	4	11	49	4722432	7.78601e-06	0.02098
CASP8	571730	386	37	166881	37752	205686	11	2	2	28	161	8349393	1.24296e-05	0.029306
DCLK1	82515	1033	-14	205686	58500	417690	25	3	7	4	43	1752699	1.61653e-05	0.0338788
RBM46	73501	1021	-18	149331	39975	63648	14	2	1	13	80	2358681	1.94469e-05	0.0366807
AJUBA	1240941	185	38	146289	46176	183222	8	0	2	25	124	7081191	5.82372e-05	0.0998609
MAPT	369065	469	19	213213	66066	256113	19	1	6	9	50	3375684	0.000185837	0.292105
SCG2	276568	364	-7	173550	43836	27963	14	2	1	13	50	2728167	0.0005258	0.762896
NYAP2	17102	517	-4	176865	55029	89973	21	3	3	6	56	2069184	0.000592328	0.798035
A1CF	113129	613	19	178776	50310	300339	15	3	7	4	40	1912326	0.000669321	0.830641
C6orf25	2517236	193	20	74919	17628	109629	6	1	2	17	48	3250728	0.000704604	0.830641
PPP1R13B	712218	320	39	302640	87789	363402	10	0	0	1	2	1370382	0.000759215	0.842372
C9	168073	424	-8	160641	40833	272259	12	1	2	2	6	810888	0.00101535	1
OPN3	172337	341	-13	108615	34242	107172	4	0	1	14	78	4608630	0.00103469	1
ATP8B1	340613	247	36	358722	93366	561600	10	1	8	18	64	4799301	0.0012045	1
UGT2B10	99797	764	14	295893	77571	839826	10	0	10	1	19	1529658	0.00122648	1
ATXN1	109777	623	30	217035	69849	53352	11	2	0	8	35	2011347	0.00129803	1
ITSN2	380538	378	37	493545	126438	947700	17	7	8	9	34	3064152	0.00138674	1
HHIPL2	227631	467	-6	200811	57642	231426	12	1	2	6	26	2077530	0.00142352	1
HAMP	767246	472	7	24570	6669	66222	4	1	0	36	170	7992192	0.00143679	1
BAZ2B	351229	414	23	615849	161850	783783	14	6	7	8	33	2805972	0.00160887	1
PSG8	386041	417	-19	120549	33891	230607	10	1	4	8	36	1723254	0.00164176	1
PON1	134258	327	-2	101517	27417	232011	8	1	5	12	74	3828903	0.00174391	1
SLC2A2	167361	735	18	146523	42432	221598	9	2	5	8	30	1791738	0.00177782	1
PRR23A	NaN	NaN	NaN	68991	24726	0	13	1	0	21	183	6326463	0.00189641	1
SEL1L3	247887	575	54	321984	86463	372645	12	3	4	37	137	9204741	0.00203866	1
GRXCR1	32225	966	18	80964	22581	114543	10	1	5	6	37	1291329	0.00210801	1
MMP13	374035	482	-10	135759	34359	242424	12	1	4	13	78	4170114	0.00211981	1
MOGAT1	251851	308	19	95355	25389	114894	9	0	1	4	23	1263366	0.00244584	1
HIST1H3G	390169	544	57	36270	12051	47034	3	1	0	38	94	5857020	0.00268655	1
KRTAP5-4	NaN	NaN	NaN	62205	18408	35334	6	2	0	21	184	6355479	0.00274701	1
CRISPLD1	137515	703	-22	146406	35997	296595	15	4	9	8	38	1552902	0.00286571	1
ZNF418	1252385	750	-19	191061	47970	91494	15	0	2	7	26	1011309	0.00290374	1
CRYBB2	174680	535	-35	60021	14859	114075	6	1	1	9	59	2467569	0.00295188	1
MCHR2	258745	719	-16	95667	26364	121095	14	7	2	3	38	546429	0.00297743	1
VCAM1	277299	899	-6	206661	56823	223002	14	6	4	4	32	1542840	0.00297929	1
LDHAL6B	NaN	NaN	NaN	104325	29991	45045	6	1	1	26	200	8189337	0.00335024	1
UGT2B7	21319	782	12	149955	38649	168012	15	4	4	6	52	1557309	0.0036285	1
ICT1	1111289	171	31	59553	15678	123552	4	0	3	31	178	6807996	0.00375324	1
HNF4G	47353	914	7	128778	32214	227448	21	3	14	1	39	709137	0.00390952	1
PTPRR	157760	458	-26	186810	50232	449748	9	3	6	5	62	2948595	0.00392974	1
SULT1C3	354622	708	-17	89622	20124	159003	7	1	5	5	32	1268826	0.00393071	1
IL17F	313097	427	23	45474	13260	135720	4	1	0	6	38	2676375	0.00394198	1
HEPACAM2	311972	785	12	135174	36816	207792	10	3	7	2	30	1187433	0.00405809	1
DNAH7	105357	518	-3	1146132	296829	1366560	64	17	39	7	112	4113486	0.00439831	1
DHRS3	340106	294	27	82797	25896	114192	3	0	1	18	72	5476809	0.00453354	1
ZNF721	553434	644	19	260832	64428	122733	10	4	0	2	10	1063647	0.00478457	1
MLH1	392784	473	21	216645	57486	529425	7	1	6	5	36	2204202	0.00487048	1
PGM5	127057	681	-4	157833	46215	198432	9	1	8	6	36	1880892	0.00490335	1
ITGB8	207764	550	30	220350	56004	272025	8	2	4	40	224	12532884	0.00491971	1
NUP37	232146	467	9	94497	24258	156546	4	0	2	6	10	1343667	0.0049581	1
FUT8	412062	875	38	172848	44889	265941	8	2	4	10	30	3053154	0.00497062	1
OPN5	173532	829	-4	99177	28470	166257	8	0	3	6	10	992160	0.00506467	1
PROL1	264684	915	25	66027	22308	33579	11	3	0	5	25	618930	0.00517675	1
PRB3	311837	673	-1	82212	28704	110565	17	0	6	1	10	273390	0.0052157	1
C6orf165	222811	556	26	177762	46527	296127	10	1	3	11	47	4020744	0.00541443	1
OR52B4	363779	797	-8	85878	25155	10647	8	0	1	25	173	6666543	0.00563848	1
ADAMTS20	126632	906	-21	551304	137124	486252	28	4	17	2	41	1316289	0.00568095	1
IL1B	578617	298	38	78507	19071	157131	7	0	6	1	7	351897	0.00586363	1
OR5V1	329776	872	7	87282	25857	14157	9	0	1	49	325	12423255	0.00616657	1
EDA	135563	NaN	-2	119457	36855	273780	6	0	3	8	44	2582892	0.00619455	1
NKAIN3	138003	904	-16	56979	14859	509067	8	1	10	3	23	1056939	0.00636507	1
JAKMIP2	102729	642	-4	235599	57954	580905	15	7	4	8	49	2763423	0.00660307	1
UST	169694	476	8	115362	30771	175383	8	3	2	7	37	2145273	0.00668031	1
BAMBI	204133	418	13	72930	19617	51831	5	1	1	33	179	9045504	0.00673007	1
MYOD1	391398	626	17	85761	27846	44109	3	1	0	50	221	11350716	0.00677218	1
RB1	349930	450	41	269412	68835	656019	7	0	6	4	12	1395849	0.00680644	1
BCL2L15	335231	545	13	46527	12441	85761	4	1	0	23	105	4783428	0.00697379	1
RFPL1	723458	203	35	87048	25038	77571	7	1	0	29	172	8010834	0.00697496	1
PKD2L2	946917	396	47	181311	43446	306774	6	1	6	2	28	1540968	0.00698703	1
PATL2	NaN	NaN	NaN	154557	43407	0	10	1	0	50	753	26427765	0.00726847	1
PARD3	139914	776	0	387699	103935	669942	17	1	5	0	6	773877	0.00729877	1
CDPF1	519654	205	31	35295	9399	38142	3	0	1	50	302	12748866	0.00747095	1
KHDRBS3	16039	1124	-24	98280	27261	318591	12	2	8	0	10	345852	0.00758796	1
ZNF750	711691	350	16	192660	61932	42471	8	1	1	50	237	11310546	0.00775033	1
PRH1	NaN	NaN	NaN	46605	14352	671112	5	1	0	0	1	685464	0.00790088	1
ABRA	113560	708	18	105612	29172	66924	8	0	2	38	214	10811580	0.00811058	1
HBE1	109545	1056	-1	41223	11661	62361	5	2	1	13	64	2054052	0.00822583	1
TMEM37	203559	497	35	51285	16458	27378	3	0	0	9	31	2509104	0.00828417	1
PI3	842540	324	25	32916	9555	59202	3	2	0	19	102	4698525	0.00839209	1
SEPHS1	246468	433	33	110838	30849	171873	7	0	3	19	148	6713733	0.00841514	1
FBXO39	936146	438	5	124566	32331	75699	6	1	1	23	49	3449043	0.00841778	1
RIPK4	302894	182	30	211653	67392	148941	14	3	2	1	13	557934	0.00846576	1
BMPR2	369483	417	30	289380	80925	265356	10	0	4	16	53	4601181	0.00875989	1
TNFRSF9	381467	207	24	74061	19071	171054	5	1	4	9	34	2017938	0.00882281	1
PIP4K2A	196977	577	25	117507	29562	215865	3	0	5	9	25	2891616	0.00882586	1
FAT1	351973	513	-13	1262586	360321	463437	31	9	7	8	56	2629926	0.0089055	1
CAPN2	528883	407	2	203580	52416	496431	8	0	9	18	83	5025228	0.00911707	1
CLRN1	353086	635	10	69615	18954	122382	6	0	3	50	306	12288627	0.00934315	1
DNER	253305	456	-3	207246	57408	241722	10	2	3	9	34	2934321	0.00936369	1
LPHN2	55308	1274	-19	394875	106821	624897	17	4	19	6	30	1341951	0.0097481	1
RASA1	154501	726	24	298779	81471	468936	6	0	2	2	9	1269138	0.00985868	1
C19orf69	NaN	NaN	NaN	35880	10803	0	4	0	0	50	752	26395161	0.0102579	1
MYH8	80361	731	-49	557778	140244	712764	28	19	36	6	279	4513353	0.0102667	1
PENK	411547	624	-16	75309	19929	48204	8	1	0	23	67	3935529	0.0103345	1
HMCN1	260400	509	-19	1584258	443586	2575170	40	9	20	0	29	3018756	0.0103423	1
NCF1	895858	125	49	111852	30303	54873	4	0	2	46	247	12609246	0.0104487	1
ZNF831	876466	202	15	442026	148824	146133	43	9	3	8	67	2445651	0.0107612	1
GLT6D1	362222	524	29	78468	20631	87399	6	1	3	5	39	1618227	0.0108013	1
LENEP	1612870	224	35	16926	5538	74178	2	1	0	10	36	1656564	0.0108526	1
STK19	2314693	203	34	105378	33384	423072	8	1	3	5	30	2324985	0.0109061	1
MBD6	1347795	303	44	259584	97968	201591	14	4	2	5	47	1800279	0.0110291	1
ZNF365	157974	731	-3	196950	54249	314496	7	2	3	3	17	1317615	0.0111535	1
PDCD11	544182	147	48	523419	150033	905931	16	6	14	7	37	2945085	0.0112433	1
PCDHA12	NaN	NaN	NaN	252018	80964	128934	18	4	0	2	19	733122	0.0113055	1
DST	403209	446	23	1911936	485160	2228967	23	9	0	5	14	3540732	0.0113168	1
PDE1A	359828	401	-5	163137	40911	390780	10	2	15	6	44	1719705	0.0116022	1
FNDC5	1019374	232	15	46371	12012	102726	3	0	3	24	163	5065671	0.0117352	1
ENPEP	81828	684	-3	273468	71682	388440	22	4	11	8	89	3103932	0.0118134	1
CLVS1	491040	596	1	99372	27105	114894	7	1	1	6	52	3341208	0.0119899	1
MLL2	1770671	214	65	1489605	479037	775242	55	25	19	4	55	2090946	0.0120421	1
PCDH15	2832	1222	-41	702351	193284	904293	59	15	41	1	62	1154361	0.0122457	1
ROPN1	244828	450	24	59553	17082	118755	6	1	2	30	173	9300837	0.0129271	1
DKK2	48475	1014	-18	72696	19968	98514	8	3	2	19	209	5242731	0.0129361	1
CCDC80	255516	510	24	262665	74412	153738	11	2	2	7	27	1650090	0.0129815	1
SLC9C1	268687	508	22	341874	84708	619281	17	0	19	5	63	3072888	0.0130298	1
SLC35F1	200805	959	-18	112749	34086	270738	8	4	10	2	22	650559	0.0131125	1
OR2W1	155147	738	1	87555	25116	11115	7	0	0	50	356	13797186	0.0134049	1
CAPSL	138289	614	0	60060	14937	100503	7	0	4	21	101	4313907	0.0134668	1
GSTCD	292053	357	8	179712	47970	211770	5	1	3	12	27	2201355	0.0135128	1
FGB	59883	1034	20	141687	34515	150228	10	3	3	12	67	2796534	0.0138434	1
ST6GALNAC3	259709	989	-11	87906	22776	161694	8	1	7	4	27	1103115	0.0139457	1
LIPN	175532	327	31	115284	28275	107289	5	0	2	17	89	6248112	0.0140421	1
PCDHA4	861651	606	2	252720	82602	441792	22	5	0	0	5	524394	0.0142506	1
SLC26A5	355264	620	17	213798	60684	682929	7	2	11	11	62	4165629	0.0143866	1
C7orf72	NaN	NaN	NaN	124176	33657	0	8	1	0	50	753	26418015	0.0144467	1
KLRC1	382960	334	1	67899	17043	119223	3	0	3	23	117	6943443	0.0145377	1
WFDC12	865186	324	46	32019	8463	56160	2	0	2	5	37	2459613	0.0146249	1
PARP15	419536	311	44	197145	54639	193284	8	1	2	16	74	5884125	0.0146513	1
HPGDS	129148	311	14	58617	13923	113724	4	1	2	18	103	4348578	0.0147178	1
CXCL9	489826	399	43	36387	9477	119925	3	0	0	8	17	1652079	0.014741	1
C4orf40	181352	975	12	58812	20280	82368	7	1	2	27	126	4811235	0.0149844	1
FGF21	1635420	190	44	55692	18954	70200	7	0	1	50	262	11573016	0.0152046	1
GKN1	338803	222	16	58344	14430	124488	4	0	3	23	90	4813419	0.0152842	1
M1AP	996981	278	50	148746	42315	340002	6	2	6	2	17	1041729	0.0156198	1
PDXDC1	535071	214	23	225693	61542	692523	5	0	5	7	16	2163057	0.0156349	1
TEK	116738	387	-28	319839	85332	552591	11	3	9	11	58	3755232	0.0160179	1
IL24	467839	385	39	62790	12792	142155	5	0	1	17	72	5636943	0.0161123	1
PPM1K	432936	304	25	104637	29094	177489	4	1	4	8	49	3470688	0.0165585	1
RNF11	503560	305	7	43251	12090	89154	4	0	2	50	328	14812668	0.01658	1
IL17B	422727	380	28	50271	14664	58734	6	1	1	18	119	5367375	0.0165819	1
SNTB1	154339	819	2	146718	45279	245466	7	2	2	7	38	2848014	0.0166415	1
LEPR	178338	528	-8	354705	89661	529542	16	8	11	7	74	2227836	0.0170741	1
VIT	577288	323	-8	206427	58578	318942	9	4	8	7	39	2019849	0.0173449	1
ROCK2	495833	170	25	407004	95511	767169	12	4	2	4	20	1855152	0.0173533	1
HMGB4	131426	852	9	52338	13533	20241	5	0	1	20	178	5667948	0.0174914	1
GPLD1	399209	465	7	243750	67470	541125	8	4	10	10	59	3397758	0.0175075	1
TCEAL6	132641	NaN	4	52143	12909	29484	2	0	1	27	164	6098898	0.0175961	1
ANGEL1	308800	471	39	185640	54093	192582	6	2	4	5	25	1789281	0.0176336	1
DCSTAMP	40736	1032	14	128700	38025	70434	12	2	3	7	69	1816308	0.0176764	1
ATP1A4	841605	386	29	289341	82017	554697	12	6	22	5	45	1231698	0.0176781	1
C7orf10	120126	802	-13	124605	34866	402597	6	3	12	5	169	4418817	0.0179762	1
SERGEF	645462	595	17	129948	36309	163332	3	2	0	17	57	4130061	0.0180961	1
CALHM1	542721	170	51	92547	29718	28665	4	2	0	45	221	10682139	0.018113	1
MGAM	196155	846	-7	532194	141960	1458054	40	12	54	2	77	1893528	0.0190925	1
PPP1R2	762316	331	42	60801	13845	103428	3	0	3	6	29	1978119	0.0191231	1
CCR9	222879	519	54	103077	27729	100386	5	1	2	11	42	2788110	0.0191624	1
PCDHA2	861651	606	2	260130	84552	479232	17	4	2	0	6	563784	0.0192596	1
SNX20	294632	792	1	97734	31200	75699	3	1	1	16	109	4786119	0.0192982	1
ESCO2	406636	229	23	172029	43953	227214	4	1	1	18	38	3560700	0.0194486	1
BCLAF1	286851	153	21	259233	69186	208494	21	4	1	6	35	2037477	0.0194598	1
CA5A	612550	133	27	86736	23712	199134	4	1	1	24	76	5577546	0.0198867	1
DYDC2	340132	598	-7	51714	12168	109629	4	0	0	2	0	371436	0.0201056	1
FBXO25	173778	838	-19	110799	23049	218322	4	0	3	6	37	1932450	0.0201295	1
IL1A	578617	298	38	78546	19734	155961	3	1	0	9	61	3746301	0.0202774	1
PCDH11X	123263	NaN	-21	379236	110994	507429	18	7	11	7	56	2489682	0.0202793	1
LACE1	346225	491	37	138801	35997	257049	4	1	3	8	17	2120703	0.0204814	1
COL4A4	248623	465	5	464295	151125	1121562	43	1	31	7	92	4040556	0.0207335	1
GRAMD1B	684637	439	15	214149	54132	416403	12	1	18	3	39	1260246	0.0208282	1
SMYD3	219137	939	-6	124059	31668	292383	8	3	4	3	31	1687062	0.0209661	1
C1orf114	286300	491	7	146172	34827	106002	10	1	0	18	79	4067856	0.0210988	1
TTC23	273585	361	-7	127218	34710	215046	4	2	2	10	45	2383017	0.021206	1
RPS26	2693176	215	38	32838	9516	109980	2	0	0	9	43	2941575	0.0212419	1
C1orf54	1213150	197	38	39156	9750	159939	2	0	3	13	43	2502942	0.0213409	1
TMEM72	75634	905	25	75582	23400	78156	7	1	2	8	35	2491866	0.0214472	1
OR2L3	20939	1015	-27	84357	25506	16497	9	2	0	7	50	1300884	0.021449	1
TPR	271754	338	-19	678912	174486	1121094	9	0	0	0	0	1295580	0.0216857	1
GDF3	237142	672	14	99801	29250	50778	6	3	0	4	17	889044	0.0217173	1
AFF3	353071	868	12	352521	97695	583713	31	15	24	0	39	681408	0.0217905	1
OR8D4	89099	736	-8	85059	25272	9126	5	0	0	46	368	12962235	0.0218206	1
SENP3	1957426	194	24	159744	46878	245817	4	0	0	6	4	1774266	0.0219695	1
FIG4	335902	637	29	261807	67197	518661	8	1	11	5	37	2218359	0.0220146	1
PLD5	75320	854	-18	128583	31824	355680	11	4	15	7	61	1664364	0.0221056	1
ABAT	402778	358	-10	145080	37791	355446	4	2	9	16	96	4865406	0.0222847	1
CD300A	491117	504	7	83499	24609	132210	6	1	3	4	20	1535820	0.0223199	1
DPPA3	237142	672	14	45474	12324	85644	6	1	3	4	17	889044	0.022369	1
MS4A6A	336539	784	-2	74607	18525	157248	5	0	3	13	68	2804139	0.0224043	1
AKAP3	277828	874	18	234585	66339	171522	10	1	2	7	32	1729455	0.0225103	1
C6orf57	119480	618	15	30771	8658	36621	2	0	1	31	159	7001046	0.0227849	1
LIAS	648710	177	43	107367	28470	296829	3	1	3	11	79	4442295	0.0228615	1
AGR3	360434	376	-15	50154	11739	399321	2	2	3	16	36	3331380	0.0231502	1
LRRTM4	7531	1175	-21	163566	45279	63765	29	5	7	6	130	1854957	0.0234901	1
EEFSEC	858998	410	48	162630	49959	160875	6	3	1	1	22	1784328	0.023506	1
ZC3H6	593451	449	24	333723	89115	129168	12	0	6	23	127	5170932	0.0235943	1
COMMD8	87789	528	23	53274	13416	95121	3	0	3	20	65	4022265	0.0237807	1
TAAR8	178165	618	22	93171	26988	9711	7	0	0	23	124	6398106	0.0239131	1
MFGE8	562979	560	7	109044	30420	144027	4	1	3	28	160	8711157	0.0241705	1
C15orf32	288049	578	-30	50505	13260	84825	3	0	2	11	51	2892669	0.0242374	1
ZNF441	904926	521	-1	198354	46644	37674	7	0	2	31	112	4753983	0.0243213	1
CASP2	379804	372	21	129519	34164	309348	7	1	5	10	54	3681366	0.0244532	1
DNAH5	148607	674	-17	1314768	345345	1878318	79	30	69	2	105	2461056	0.0251753	1
HSD3B2	409405	720	3	102765	29562	74295	5	1	1	15	81	4041843	0.0252714	1
ROR1	138354	492	-3	259935	73749	318357	12	6	1	5	25	1324323	0.0253491	1
ESM1	205256	603	13	52221	13884	79794	4	1	0	12	58	2724813	0.025649	1
LHFPL3	324628	895	5	65013	19110	250848	4	3	1	2	8	1229631	0.0258091	1
TPH2	223598	619	-18	139971	37050	326898	8	1	7	11	64	3865095	0.0259567	1
BATF	691659	175	49	35451	9711	36738	2	0	1	50	177	8986770	0.0261205	1
FAM209B	273023	455	-27	48126	13182	66573	3	1	0	33	265	11671881	0.0261602	1
LENG1	735613	439	-53	72618	22503	136305	4	0	1	7	31	1667640	0.0264424	1
CPNE3	192772	1166	22	156273	39585	335790	8	1	6	23	95	6484062	0.0269403	1
LRRC3B	5998	918	-24	71331	19929	26208	9	1	2	16	158	2661516	0.027208	1
INADL	274287	469	-3	510549	141609	998361	8	3	13	8	55	4181814	0.0272187	1
KNG1	463823	395	37	190515	49803	209313	11	1	4	6	27	1646541	0.027319	1
KCNMB1	55692	614	41	53157	15639	76635	5	0	1	3	8	827151	0.0273692	1
KANSL1	388537	357	21	302874	91650	293670	7	4	5	25	121	7182786	0.027497	1
PKP1	758588	193	23	211029	58071	265005	4	1	6	13	55	3772977	0.0277808	1
ZNF679	NaN	NaN	NaN	118326	28392	72072	11	3	3	6	108	2369016	0.0278876	1
CRYGC	327858	440	13	49725	13104	69615	3	1	0	50	284	14858064	0.02797	1
ST6GAL2	52131	1042	-22	153387	45162	113724	13	2	1	6	32	1213212	0.028068	1
USP28	169458	534	10	308958	80886	620451	8	1	6	2	19	1492920	0.0280698	1
MASTL	386910	555	43	248742	65286	287235	8	3	6	9	61	2983110	0.0280721	1
POLR3A	362530	184	31	394290	107991	719199	9	4	13	13	93	4261179	0.0282143	1
CSF3	1652518	216	28	57057	17823	47268	5	0	3	11	106	2965599	0.0282833	1
PCDHA5	896676	606	-12	258999	82641	399672	16	6	0	3	29	1784952	0.0283544	1
BTF3L4	658095	315	18	46449	11700	116766	2	1	0	5	5	856557	0.0286713	1
HHIP	143634	1116	-6	198588	53079	300924	13	3	6	5	39	1972581	0.0289987	1
LCORL	271221	1064	26	185640	50232	197145	7	1	5	4	27	1406067	0.0292576	1
IRF2	207866	400	55	100854	25740	218790	3	3	0	33	95	9116952	0.0293227	1
SNRPN	NaN	NaN	NaN	65598	21801	374634	8	1	7	2	23	919659	0.0295728	1
SLC17A9	961230	336	40	122421	36582	260793	5	3	8	4	41	1760889	0.0296083	1
TMPRSS13	527704	576	45	158067	47151	189189	8	2	4	4	20	1197144	0.029616	1
MC2R	133238	815	-2	80730	23868	25038	6	2	0	21	99	3985722	0.0297382	1
EPS8	259826	496	11	236301	61932	424710	9	3	3	10	36	2609646	0.0298224	1
CFH	198896	941	-26	356148	87984	462735	40	5	34	1	52	699738	0.0301319	1
SPSB4	245950	574	22	71955	24687	40599	5	2	0	8	56	2765724	0.0301927	1
LPCAT2	119965	430	-29	153582	43797	287586	9	0	3	11	72	4337892	0.0302432	1
H3F3C	271605	394	20	35997	11973	29952	4	0	1	15	116	4900389	0.0305564	1
SYTL2	354036	435	1	495417	131352	532350	17	5	4	10	61	3564405	0.0306677	1
SAMD9L	362550	625	8	443547	113256	18018	21	3	0	8	49	1889238	0.0308771	1
RPL39L	475647	452	36	14976	3744	31590	2	1	0	40	212	9790326	0.0315819	1
FAM192A	731638	149	48	73554	18759	165321	4	1	2	20	55	4222413	0.0316546	1
CA8	206353	885	-14	83655	22230	154206	9	2	3	2	7	346905	0.0319753	1
ADRA1A	259233	692	3	151710	46020	107289	7	1	1	7	19	2130726	0.0320348	1
ZNF468	557083	1008	-39	148668	36309	172458	7	0	2	6	12	1277679	0.0321356	1
CNTN5	3647	1135	-26	310479	86736	382239	26	4	26	8	125	2018562	0.0322481	1
FURIN	833957	291	42	219258	66339	182286	7	4	8	4	70	2457312	0.0323447	1
OR6K6	103627	985	1	93288	27456	14742	8	1	0	50	333	12526605	0.0324687	1
ALOX5AP	381672	451	76	46254	12714	108927	3	0	2	11	48	2006706	0.0325018	1
TXN	207910	302	8	32019	7293	79794	1	0	1	50	154	10846953	0.0325845	1
DPYD	64696	807	-6	293748	81471	680121	10	1	9	4	30	2207595	0.0328001	1
DEK	467694	497	4	111852	24804	218907	4	1	2	7	26	2579343	0.0330064	1
PRB1	175992	673	-18	88218	29952	83304	12	0	2	6	126	3594201	0.0330839	1
FAM180A	470926	386	-1	47580	14430	62127	2	2	0	42	221	10255518	0.0333599	1
RTKN2	111669	382	9	175305	44187	191646	7	0	1	4	15	1340196	0.0335105	1
CSRNP3	104412	947	2	163371	44187	120861	7	1	5	9	18	1274325	0.0340904	1
NR3C2	73880	914	-15	272064	77415	180765	8	3	3	7	31	1441167	0.0343653	1
GOT1	277366	575	-5	115908	33150	219960	3	2	3	29	145	6567600	0.0344983	1
REG3A	10958	1389	-22	51012	13572	126945	13	2	15	2	54	439491	0.0345804	1
PRB2	175992	673	-18	109161	38844	85293	14	0	4	13	180	5807256	0.0346283	1
BMP5	68578	483	-9	128544	34203	148707	11	1	8	5	37	848679	0.0347692	1
OR4L1	383274	768	-37	85059	24804	14040	13	4	1	5	35	466050	0.0348643	1
BBX	224591	699	2	269178	68484	319878	10	3	4	2	11	1044108	0.0349733	1
OR9I1	NaN	NaN	NaN	84435	26130	9477	4	1	0	50	753	26419965	0.0350497	1
FOXP2	42204	828	-13	222066	56277	394758	6	2	10	3	69	2573025	0.0353178	1
STXBP5L	319082	785	-8	339105	90168	515034	31	1	15	1	17	641004	0.0355821	1
CD180	36320	392	14	183105	50193	65988	7	2	1	5	65	1707459	0.0357326	1
FIGLA	596622	629	24	61308	18252	46566	3	0	1	20	112	4269993	0.0359693	1
GYPE	166879	959	-9	23166	6201	81900	2	0	5	13	110	2637570	0.0360956	1
TMEM211	363566	415	-21	35841	10959	47619	2	1	1	8	45	2080806	0.0361146	1
TMEM14E	194580	402	35	34242	10218	29718	1	0	0	50	191	14802645	0.036143	1
ZNF148	377619	174	43	223821	58032	198432	8	3	1	19	56	4061811	0.0364543	1
HSD17B3	293976	504	20	89310	24765	260676	5	1	8	17	130	5136066	0.0365221	1
NEFH	723458	203	35	278616	81393	60840	10	3	1	7	43	2055456	0.0365864	1
PTPN22	326668	406	15	235989	59436	418626	11	2	7	18	70	4842825	0.0368337	1
ETNK1	206703	644	2	135603	38142	196092	5	1	2	5	14	1272453	0.0369678	1
MYB	150100	410	32	216879	57603	331812	4	4	1	28	110	8539752	0.0374104	1
PTCHD3	345745	581	2	210132	60840	105651	10	1	3	10	64	3663426	0.0375552	1
ATP6V0D2	192441	1158	-20	100893	25818	194922	5	2	3	17	73	3472014	0.0375677	1
KNSTRN	872646	184	42	95784	24024	211419	10	0	5	4	31	998322	0.0376624	1
HOXB3	946208	524	29	115128	36972	71370	8	0	3	7	7	555711	0.0376634	1
KIAA1324L	154470	1087	-7	295308	76050	404703	15	5	16	2	26	594594	0.0377628	1
ATXN3	356163	415	27	108381	23595	250848	4	0	1	2	17	1186536	0.0378029	1
G6PC	1629499	190	23	99606	28158	128349	4	1	5	42	381	12105561	0.0378501	1
DNAH11	118223	671	8	1287468	338715	1280799	50	0	48	11	86	3046953	0.0378805	1
TTBK2	611976	453	31	344682	98865	473616	12	0	6	4	20	1783977	0.0379738	1
AHCYL2	776656	420	44	185874	50466	478530	8	1	7	5	30	1697826	0.0382116	1
CRYGD	327858	440	13	49530	13065	36036	3	2	0	7	29	1307748	0.0383877	1
PCYOX1L	422727	380	28	135681	40638	106938	5	3	0	30	166	8281299	0.0385308	1
KIAA2022	251853	NaN	7	421590	112281	61542	16	5	2	5	56	1856790	0.0385356	1
SLC44A4	2485614	188	36	201513	57642	381303	7	1	13	4	27	1403688	0.0385585	1
HAVCR2	166999	1198	18	84669	24141	146250	8	0	4	9	26	1232595	0.0385853	1
BCKDK	1296884	351	35	115167	34710	172458	4	3	2	50	281	13358085	0.0388131	1
LATS2	446900	192	41	296634	88413	126243	11	1	1	16	48	3608085	0.0388365	1
KMT2C	261375	616	16	1369251	382005	1409031	25	7	15	1	23	1964157	0.0392442	1
PRKD1	23615	1041	-39	258843	69576	393120	19	2	2	0	4	462696	0.0392773	1
C9orf43	390186	297	36	134706	33540	382590	8	1	9	4	20	926757	0.0393592	1
SLAMF8	802263	403	6	78312	23946	119808	4	0	1	11	47	2745912	0.0394334	1
CFI	212346	417	26	169845	40755	264069	5	2	5	8	46	3353844	0.0396715	1
RDH12	482264	186	44	86970	27105	187668	3	0	2	11	37	2570061	0.0396934	1
APOC3	421374	323	39	28626	7878	62946	1	0	2	39	161	9519471	0.0397035	1
MOG	484408	755	34	85956	24141	261495	5	2	4	9	27	1429077	0.039906	1
RGS7	134467	834	-27	145158	34086	606879	22	5	42	2	82	1442337	0.0400164	1
CD93	199022	554	-50	173784	55887	44109	13	5	0	10	55	1686633	0.0400835	1
FUCA2	338098	401	20	131703	35607	122031	2	1	1	15	101	6204705	0.0401311	1
LMBR1	338947	615	6	141375	38454	295425	3	1	5	1	10	1044537	0.0403453	1
WEE2	200522	844	14	161343	43173	334737	8	3	0	3	5	624897	0.0407234	1
EFNA5	78424	628	21	65364	16887	91611	3	1	0	6	17	1178541	0.0408932	1
DCAF13	430771	673	28	172809	47502	230490	7	3	0	5	12	1232907	0.0409957	1
PON3	135737	327	-2	101439	27378	252369	7	2	7	10	64	3019536	0.0411049	1
SPAG17	192120	741	-7	641901	161187	1224990	27	4	23	4	55	2307669	0.0414705	1
RNF40	1632278	158	61	278850	81744	367146	7	1	7	6	41	2659722	0.0415589	1
FAM104A	205112	251	-15	57408	17238	67275	3	0	0	6	11	1227876	0.0415712	1
SNX15	3209258	207	49	94887	29016	172224	5	1	0	3	7	714519	0.0417384	1
LTF	266701	565	34	201786	55497	394056	9	4	9	9	46	2133768	0.0418344	1
SETD9	201203	393	41	85020	23322	155727	2	2	1	21	87	7354893	0.0418487	1
DEFB126	215351	430	25	31473	8775	56043	3	0	2	6	24	1614171	0.0418914	1
RNLS	193044	396	33	103779	28080	165672	3	1	3	50	243	15612714	0.0420068	1
AMBRA1	880494	212	45	330876	101439	419094	12	2	3	2	10	1020435	0.042027	1
KRT23	1036346	358	5	120081	31668	194220	6	1	5	14	75	3245892	0.0420659	1
LRRC6	188389	902	-4	137436	31863	282087	5	2	5	6	20	1609998	0.0420801	1
GABRA2	69760	992	3	128895	33969	193401	6	4	4	17	148	3543267	0.0422315	1
GGCT	624959	400	36	54015	13728	114309	2	0	2	9	55	2739789	0.0423604	1
SRSF7	850854	184	26	66300	20865	214227	3	0	0	1	0	640887	0.0424039	1
HN1	1511891	168	25	57174	10803	67743	2	0	0	27	108	5719545	0.0424335	1
BTG1	114728	510	7	47463	13377	40131	3	0	1	50	242	12044838	0.042483	1
PLEKHS1	261759	545	-4	106821	26208	346203	7	2	5	19	79	4137315	0.0425837	1
KIAA1107	NaN	NaN	NaN	379314	100035	0	12	3	0	21	185	6401772	0.0425862	1
IL23A	2869106	184	52	52299	15795	72189	2	0	1	50	336	14859702	0.0426657	1
OR52K1	190769	879	-1	84279	26754	20475	4	0	0	17	61	3133962	0.0427891	1
PROK1	403650	479	31	29718	8658	72657	1	0	1	25	79	5096832	0.0431373	1
RBM47	247828	341	64	161343	49023	102375	5	3	0	17	65	4772352	0.0432601	1
ZNF415	392290	946	-49	159978	39039	93483	10	0	5	3	14	689442	0.043292	1
ENPP2	255492	552	7	275223	67470	652743	15	4	23	11	95	3516201	0.0435075	1
GRAMD1C	442573	363	36	192543	48360	608049	5	0	6	2	8	1267188	0.0436482	1
RABGEF1	539697	302	55	141765	34671	196443	3	0	0	6	7	887484	0.0437705	1
C10orf120	321415	530	1	95004	24336	68562	6	2	2	2	17	649467	0.043796	1
CMTM3	777342	214	9	51051	15522	75114	2	0	0	27	131	8197488	0.0438237	1
SNX9	255375	169	40	174486	42666	348894	5	0	6	19	66	6566118	0.0439131	1
CHL1	25264	796	9	351546	90597	555867	23	1	13	0	14	646464	0.0439539	1
C20orf26	228680	750	-3	356304	94146	831636	16	6	16	8	47	1955850	0.0439753	1
COLGALT2	348183	732	11	176280	48945	300690	10	3	6	12	108	3634098	0.0440463	1
TRIM50	902769	422	52	133614	40482	210015	9	5	6	6	38	1153386	0.0440959	1
BMP3	10953	1083	4	129402	37557	55224	6	2	1	20	128	3339258	0.044525	1
ARHGEF10L	375252	279	30	357552	104832	549432	14	5	12	21	139	7019337	0.044583	1
EQTN	116649	454	-34	85722	21567	148824	3	0	1	4	5	856908	0.0445897	1
ACBD7	254900	620	21	26598	6279	70434	1	0	2	30	153	6764784	0.0447017	1
ABCA4	512482	370	-2	641940	179166	1122615	24	16	25	8	79	3026205	0.0447614	1
CASR	557700	602	41	298545	86034	163449	20	5	3	4	17	1053156	0.0448029	1
GRIA4	86500	920	-22	280293	75387	349596	22	5	21	1	39	686790	0.0448275	1
ECHDC2	626387	311	30	72384	23556	182754	3	0	0	3	9	942474	0.045002	1
LYAR	146135	584	35	111852	25272	188604	3	0	2	18	64	5620134	0.0451698	1
QRFPR	268761	809	-2	120783	33189	227448	11	3	5	0	8	260637	0.0452191	1
TPST1	551438	412	26	103428	29016	92079	7	0	3	10	35	1808196	0.0460404	1
SUV39H2	255711	396	38	99645	25428	133263	2	0	1	27	86	8491158	0.0461063	1
C12orf4	283278	908	27	160758	39429	292734	3	0	2	2	3	774540	0.0463938	1
TMEM155	326547	440	18	36738	10647	54405	1	1	0	50	305	17740671	0.0465857	1
AMBN	262055	689	14	127452	35646	287586	8	0	7	12	38	2158767	0.0466593	1
FAM5C	6711	1261	-26	214890	57603	130689	22	8	4	4	47	588003	0.046784	1
USP13	361278	589	12	248781	64077	521001	8	3	8	19	87	5355636	0.0470178	1
TRIM41	1034999	415	35	182208	52845	174447	5	1	2	13	43	3271827	0.0474989	1
SYNJ1	355341	345	65	457977	127140	618228	10	4	9	6	29	2167464	0.0476357	1
PAX3	191783	682	11	154050	42159	232830	5	1	5	45	204	11338158	0.0481504	1
ELL2	316216	247	51	181116	49023	255177	5	1	5	15	53	3936036	0.0481746	1
FBXW7	117295	501	51	238056	63804	248157	5	1	5	10	40	2774343	0.0481892	1
TIAM2	120675	362	27	475644	132990	556452	14	5	13	3	19	830076	0.0482349	1
OR9A4	198115	856	-6	85215	25350	17901	4	2	2	4	134	2800083	0.0483236	1
CEP97	547972	421	9	243126	65754	262197	4	0	2	5	35	3466398	0.0485409	1
ATXN7L1	406187	454	33	244218	74373	133146	9	0	5	6	40	2013726	0.0486095	1
NLRC4	394223	276	21	287001	76401	190359	9	3	3	24	129	8152443	0.0486257	1
ZNF117	216422	994	-9	138372	32448	166842	8	0	0	1	0	290394	0.049115	1
PRB4	311837	673	-1	65949	22737	111384	15	3	1	1	10	273390	0.0491226	1
CLIP3	980636	320	19	152256	46176	224289	6	0	4	6	31	2105844	0.0491379	1
LPIN3	383021	309	5	237276	70668	361530	12	2	8	8	29	1550094	0.0494218	1
CHUK	1070291	198	25	217737	53703	447525	5	0	1	1	3	666276	0.0495738	1
TUBA8	519135	179	19	124293	35763	80613	5	1	1	8	14	2323620	0.0496381	1
IL5RA	59117	1039	-15	123669	31590	229554	7	1	7	4	22	1077804	0.0498357	1
C4BPB	434877	155	24	74646	17199	128349	4	1	1	10	66	4849104	0.0498595	1
DNAJB6	318088	174	22	97305	25545	206856	3	0	0	5	20	2458599	0.0499797	1
TCEAL5	455954	NaN	17	58734	14391	29133	3	0	0	50	309	13709748	0.0499861	1
SH3BGRL2	205695	824	2	31668	7644	87867	3	0	0	4	11	1361919	0.0502266	1
C19orf12	223109	552	-46	41847	12792	53937	2	2	0	5	33	1531608	0.0503913	1
GAS2	52076	981	1	89895	23829	160524	7	2	5	7	44	1494987	0.0504124	1
LRRC43	808864	187	12	180297	55926	270621	11	1	9	7	58	2304666	0.0504375	1
EEF1G	2695768	217	42	125307	32877	197613	5	1	4	21	130	6454071	0.0504841	1
ARID3B	655453	206	59	154206	46449	166842	7	0	2	14	54	3545061	0.0506376	1
HCRTR2	27686	676	-13	123981	35022	135486	7	2	3	3	69	2373423	0.050784	1
GUCY1A2	63799	885	-21	202722	57837	418743	8	4	1	6	10	1072305	0.0508597	1
BRS3	374989	NaN	23	108849	32721	51012	3	0	0	8	45	2680353	0.0508774	1
TAF15	620019	235	8	169923	45474	328302	4	0	2	2	14	1314573	0.0510573	1
FSD1L	NaN	NaN	NaN	163722	39624	736983	3	0	3	0	3	776607	0.051164	1
GCNT3	521844	172	33	121875	32682	33345	10	1	1	4	11	821340	0.0515982	1
MT4	598942	187	24	19734	3783	81666	1	1	1	6	31	1481844	0.0517012	1
LPGAT1	465080	281	13	106665	26832	196092	3	0	1	2	13	1512147	0.0519291	1
CCDC148	133882	759	-5	179400	40326	301275	6	2	4	4	12	894387	0.0520208	1
ALPK2	204534	290	67	600522	167115	307242	19	5	3	18	76	5733156	0.0520264	1
TMEM139	379894	399	14	58266	18837	61425	4	2	0	50	262	15392949	0.0521142	1
DCLRE1A	264051	515	7	292344	76791	207441	5	0	4	11	35	2029248	0.0523054	1
CEP85L	129707	1029	8	244335	60567	457587	11	5	8	4	25	1253421	0.0524253	1
FMN1	238197	520	5	334620	93015	337428	17	2	6	8	50	2732145	0.0525026	1
GAB2	404872	408	19	188331	53742	422838	5	1	6	21	92	6702891	0.0529287	1
INPP5A	155331	452	12	122577	29874	314496	6	1	9	6	67	2774889	0.0532259	1
RSRC2	868107	154	39	129168	31941	279162	4	1	3	2	6	632268	0.0532606	1
ZNF233	618477	671	-31	192270	45123	107406	7	4	0	9	38	1517802	0.0532944	1
ZIK1	495857	828	-34	137202	35724	81081	12	3	2	17	92	2318901	0.0533798	1
SCG3	415519	247	27	137787	31980	270855	7	2	7	2	22	969150	0.0535144	1
MAP1LC3B	583365	363	27	36504	9126	78273	1	0	0	28	106	6698640	0.0535469	1
KRTAP4-3	996799	468	-7	55380	13416	18603	5	1	0	50	358	8859357	0.0536354	1
DAB2	167695	374	-7	215319	61737	333450	10	6	5	13	84	3932292	0.0537038	1
STARD4	181104	636	26	59865	14781	113958	3	0	0	4	15	1569867	0.0540358	1
GDF7	580167	278	28	115986	43017	8307	2	0	0	50	207	11860875	0.0541977	1
COL5A2	237205	422	1	415896	135408	1022112	15	3	10	0	13	1157520	0.0542512	1
SRCAP	1632278	158	61	852969	295620	736164	36	8	12	6	41	2659722	0.0542682	1
CASZ1	809310	433	27	482625	143793	290160	18	7	6	5	37	1876758	0.0545268	1
DEFB131	176573	885	12	20787	4485	39195	2	0	0	15	65	3184545	0.0547214	1
B2M	673122	428	36	34554	9204	79209	1	0	2	27	131	6867588	0.0547619	1
TRAF3IP1	295666	345	32	199680	50700	331695	4	3	4	15	60	3347214	0.0551588	1
SMPDL3B	891090	272	20	137670	39117	167076	4	1	3	7	31	1798563	0.0551638	1
ADCY10	534611	238	13	466713	113724	864396	10	2	11	12	42	4159428	0.0553419	1
FAP	70846	615	5	224835	53976	547209	14	3	15	9	55	1813656	0.0553945	1
SERPINB6	446135	201	44	107640	27495	180765	5	2	1	42	141	9364368	0.0554307	1
PSMA8	168448	577	57	73671	19344	224991	6	0	2	0	2	244335	0.0555007	1
FAM181A	242993	645	15	94809	30264	48438	4	1	0	3	4	690300	0.055523	1
LRP1B	8988	1120	-11	1336647	320073	2040480	97	35	101	3	167	2819427	0.0555617	1
HIST1H2AB	408919	685	43	34398	11817	23400	3	0	0	19	72	2543424	0.0560059	1
ZHX1	545561	171	22	241371	65871	26208	6	1	0	50	182	13332267	0.0561824	1
MLLT3	85091	575	14	165477	38922	255177	6	2	0	2	14	1027221	0.056229	1
BMP10	404215	470	27	117507	32136	40716	6	1	1	37	205	10976784	0.0562436	1
PPIG	345417	404	38	220857	49764	246519	5	0	1	3	7	1423227	0.056506	1
C16orf46	259514	284	8	111072	31902	78156	8	0	0	4	6	500019	0.0566458	1
ANGPTL7	NaN	NaN	NaN	98592	25077	118053	7	1	3	21	186	6444867	0.0570812	1
BEX4	466184	NaN	-5	34359	8580	34398	1	0	0	14	73	4361643	0.0571293	1
ROBO1	72749	790	-19	470028	132054	493155	13	2	6	4	10	865683	0.0573392	1
TRAT1	107009	961	-15	55185	12792	169650	5	1	5	11	89	3852264	0.0574888	1
LYN	329738	405	50	149136	36543	314847	6	1	5	26	87	7226661	0.0576053	1
KRT25	836683	269	-10	125970	35841	197028	6	2	5	5	27	1223586	0.0576113	1
KCND2	49438	962	7	173082	50739	138762	13	2	3	9	42	1386333	0.0576252	1
PTP4A3	170603	382	51	49101	13845	93249	3	0	3	6	21	1328496	0.0576608	1
LCE3B	285984	752	17	26130	7449	3627	1	0	0	50	307	12681942	0.0579403	1
CA6	840956	264	31	88569	23400	231426	7	1	7	20	116	3919812	0.0579498	1
MSH3	319054	752	36	323622	86814	502983	4	2	6	34	113	10098465	0.0587694	1
LHX6	220092	528	30	115362	33696	71838	6	1	4	7	59	2325258	0.0589367	1
PLCL2	105775	400	15	312741	85059	180882	19	4	1	13	60	3244215	0.0593477	1
EFCAB5	652131	303	15	445809	111696	439920	16	2	6	7	30	2545257	0.0596161	1
OR4K13	383274	768	-37	82017	24804	9243	8	3	1	9	98	1514409	0.0599118	1
SPG11	666585	441	35	696969	179361	800046	9	2	8	6	17	1881243	0.0601933	1
PABPC4L	NaN	NaN	NaN	118989	32058	0	8	0	0	50	752	26416416	0.0603584	1
ZBTB26	407115	430	26	124254	31356	29835	3	1	0	11	57	4049682	0.0604752	1
MIF4GD	1723762	171	31	73203	19812	153504	2	1	0	11	68	4084743	0.0609235	1
RAET1L	402308	382	51	68952	19266	71721	3	0	0	16	46	2934009	0.0609414	1
PCDHA8	896676	606	-12	257829	83109	330408	12	9	0	3	29	1784952	0.0611901	1
ZNF644	223798	843	-7	372567	95901	215865	7	2	0	2	3	484965	0.0612405	1
EPHA5	57073	706	-19	292071	80223	458172	22	7	15	7	60	1568775	0.0613637	1
CSRP2BP	782027	479	-6	218946	60099	253656	8	2	2	2	11	705042	0.0613654	1
SNRK	153482	399	30	210795	59943	119925	3	1	2	25	115	7714395	0.061461	1
PPP4R2	128046	483	17	120978	29718	143793	5	0	1	4	26	1820598	0.0618134	1
DNM3	435280	643	6	244959	67665	341757	11	1	4	6	22	1630278	0.061838	1
NCAPG2	267997	565	-31	328692	85488	627471	9	1	4	0	5	712959	0.0619221	1
KCTD21	551110	208	23	71682	20397	25857	2	0	0	21	79	5265585	0.0619621	1
CHDC2	3834	NaN	-17	145197	36036	163566	12	3	8	1	32	667836	0.0621932	1
GFOD2	1157184	136	50	103701	32721	43758	3	0	0	26	87	5678907	0.0622211	1
DEFB128	215351	430	25	26637	6825	58617	2	1	1	6	24	1614171	0.0624479	1
BLMH	516668	184	26	133419	31785	250731	2	2	1	5	30	2009202	0.0626183	1
TVP23A	258562	356	36	61893	16263	117585	3	0	4	2	9	432081	0.0626943	1
CENPA	1334693	378	40	39000	12363	65637	2	0	2	6	32	1391598	0.0631736	1
IMP4	369510	593	29	81978	24492	155961	2	1	2	19	72	5232708	0.0632156	1
CP	388273	312	10	306657	75933	424476	9	3	10	4	30	1855854	0.063606	1
EIF2B3	839426	185	24	132756	35490	468819	3	1	0	0	1	504309	0.063795	1
CDADC1	329994	399	53	148863	36114	225108	3	0	4	45	146	11881467	0.0642734	1
SLC22A16	248863	469	20	160485	45903	202527	5	1	8	7	45	1721187	0.0642772	1
OR2L13	24438	1015	-27	85371	24960	790686	6	5	9	0	14	815646	0.064296	1
PTPN3	352374	431	12	263445	69069	577629	6	3	10	18	121	6351579	0.0643566	1
RANBP3L	213853	402	5	143325	35568	326313	9	1	4	3	16	1355406	0.0644636	1
UBXN2A	240935	226	33	75738	18330	211536	2	0	3	30	104	6864468	0.0645454	1
HBB	109545	1056	-1	40599	12519	61425	4	3	2	5	25	350532	0.0646406	1
SQRDL	201356	490	1	126555	35958	216333	5	0	3	10	44	2427087	0.0648323	1
IQCF6	NaN	NaN	NaN	29718	8658	0	2	1	0	6	103	2277210	0.0648859	1
HOXB7	946208	524	29	59826	17277	51012	3	0	0	9	25	1413321	0.0649081	1
SMAD3	444194	194	45	128232	34164	168246	5	1	4	29	114	6495216	0.0649337	1
EIF2AK2	603425	281	27	160758	40014	440271	3	0	2	3	8	953238	0.0650587	1
ATG5	181529	390	32	81159	18993	271323	2	0	2	7	49	3606681	0.0650774	1
NPFF	1469374	191	55	31863	9321	57330	1	0	1	35	206	9804717	0.0653345	1
TMEFF2	69320	677	0	109122	26715	241839	7	1	8	4	43	1320813	0.0655251	1
IQUB	89539	779	-21	226941	56667	236106	16	2	12	4	43	1184898	0.0656666	1
SRFBP1	70781	809	-4	123045	31395	147654	5	1	4	2	19	1013610	0.0657353	1
KBTBD8	99545	940	13	169221	43719	64701	4	1	0	6	31	1859520	0.0657578	1
TAF7L	404269	NaN	29	136773	31590	353223	7	0	4	3	9	852618	0.0657961	1
CD1E	135429	902	5	110604	28275	142740	16	5	16	4	35	319644	0.0658741	1
TMEM74	275834	891	-14	83070	24804	18720	6	3	0	5	40	745485	0.065914	1
SLC9B2	350752	454	26	149175	44811	248508	4	0	2	4	22	1968057	0.0661059	1
ZNF69	729638	633	-1	45279	9477	331344	3	0	5	2	13	632931	0.0662185	1
PDK1	417145	365	23	124410	33891	253539	4	2	6	14	69	4058067	0.0667655	1
KIAA0141	696239	321	48	143403	43212	269451	6	0	3	6	13	1689870	0.0668329	1
RIPPLY2	108781	870	-22	37011	9672	62127	4	1	0	8	27	1355445	0.0669331	1
METTL21C	195502	521	34	74256	20397	88569	6	2	0	2	8	512265	0.0669612	1
XCR1	225584	551	54	89427	28275	111150	4	3	0	8	30	2003079	0.0671326	1
EPHA7	18346	1054	-25	283647	74490	338832	28	4	15	4	77	1722786	0.0671361	1
RGL1	493691	597	14	229788	60840	578799	8	0	4	0	4	639639	0.0673809	1
PARVB	158082	393	34	124644	34944	409149	4	1	5	24	87	7831629	0.0675782	1
CADM2	8467	1155	-19	129285	36036	470691	9	1	12	0	13	506727	0.0677379	1
HOXD10	242935	874	15	94965	25428	45162	4	0	2	30	100	4640142	0.0678324	1
PRSS1	285408	636	11	69966	19422	167895	4	1	5	31	227	9746724	0.0678442	1
KRTAP3-2	977588	404	10	26793	8190	26091	3	0	0	34	155	6770595	0.067852	1
TANC1	311739	405	27	517101	148746	791505	12	4	6	2	11	1382628	0.0682635	1
PRPF6	1152034	208	48	266409	73593	473265	6	2	3	3	10	1083810	0.0682811	1
ANKRD35	NaN	NaN	NaN	273117	84669	318474	10	8	9	6	119	2671695	0.0684089	1
MMP7	524316	359	17	76128	20514	98631	3	0	1	31	139	10910211	0.0685442	1
PCDHGA7	NaN	NaN	NaN	252447	79716	276354	18	6	1	2	22	879294	0.0689488	1
CCR10	1740597	177	36	91845	36270	79209	4	0	0	6	18	2129478	0.0689825	1
OR7D4	398878	582	-50	83421	26442	8658	6	1	0	27	203	6823011	0.0691439	1
IL32	1626425	234	44	55965	13884	144144	2	0	5	12	44	2246595	0.069364	1
PON2	137217	333	-1	100464	27885	175266	5	2	1	17	87	4756713	0.0694659	1
TCTN3	370056	547	31	170508	48984	261495	8	2	3	6	41	2312037	0.0695799	1
GLT8D1	1217701	272	47	106665	28119	249093	2	0	0	3	6	1326195	0.0698631	1
CSTB	919787	170	68	28392	7293	54288	2	1	0	14	66	3409614	0.0702214	1
KDM3A	625501	424	22	375882	99840	540072	7	0	8	5	18	2269254	0.0702381	1
CLEC2D	251092	648	8	65559	14001	209430	4	2	2	8	30	1851915	0.0702965	1
RAB28	134712	704	22	78429	19149	152919	3	0	3	9	24	1553838	0.0703374	1
SAT2	2069567	213	34	49569	12792	149409	2	0	1	10	27	1333449	0.0706541	1
AP1S1	1044715	199	39	46098	11583	43758	2	0	2	4	17	1158534	0.0708426	1
TMPRSS2	266466	454	61	152022	40794	232128	7	2	5	8	19	1606020	0.0710111	1
DCLK2	88181	409	-4	214305	62166	367848	6	1	6	9	50	3033693	0.0713074	1
SCP2D1	256301	699	4	43290	12168	20124	4	0	0	27	192	7790991	0.0713306	1
ERGIC2	100875	599	-3	111345	27417	248274	3	0	3	3	17	1507740	0.0713483	1
TRHR	151352	616	18	109668	31083	51714	9	0	2	6	13	394524	0.0715405	1
MOK	1531739	237	40	120666	31902	216333	2	2	3	8	50	2597751	0.0715431	1
RAB3C	142186	420	9	66105	16029	182754	3	1	2	8	32	1894386	0.0716683	1
PCGF1	1019591	315	50	76245	19227	116064	5	1	4	3	28	1025466	0.0717438	1
CCL5	661778	235	20	26013	7449	57096	1	1	1	19	92	3795168	0.0717956	1
OLAH	255576	571	28	91650	23595	151515	5	1	4	5	35	1721382	0.0718927	1
COPA	939853	358	27	352326	95784	918567	6	4	7	9	42	3374670	0.0720138	1
SHMT2	2162032	238	58	139776	42627	209313	4	1	4	16	150	5264376	0.0721018	1
FN1	585272	533	13	698022	196443	1069497	24	9	25	23	129	6286761	0.0723415	1
ODF1	525392	236	55	70161	18408	45864	4	0	1	15	77	3336489	0.0723494	1
UBD	403531	798	18	45747	12987	57681	3	1	1	26	123	6122532	0.0723941	1
OCIAD1	257328	372	63	76596	17940	196677	2	0	3	26	88	7047183	0.0724454	1
KITLG	144795	419	-29	80847	19539	213876	2	0	1	10	72	4283799	0.0725005	1
COL4A6	171617	NaN	31	463827	152295	1164969	13	3	13	4	27	2728401	0.0725423	1
SERPINB3	174293	370	-5	112476	28041	178776	3	3	1	23	98	5515146	0.0728299	1
NCMAP	468063	348	28	28548	9009	65871	2	0	3	9	58	3604380	0.0730135	1
VIPAS39	527850	359	49	145041	37011	567216	4	1	10	3	25	1186965	0.0730593	1
NUDT9	530607	537	23	100386	26091	167544	2	1	1	12	23	2249442	0.073169	1
LNX1	116784	492	26	211068	60489	284193	7	3	2	13	61	3990051	0.07322	1
ICA1	176442	544	19	142038	34398	306072	4	3	5	18	52	3106740	0.0732644	1
RBM12	1423559	169	53	249561	78390	25857	9	1	0	25	138	7474506	0.073653	1
S100A5	1454773	186	26	32838	7527	146601	1	1	3	10	59	2712723	0.073958	1
EMILIN2	564910	468	37	288600	84630	146133	13	2	2	14	61	2938728	0.0743273	1
AIM1	220264	271	41	479778	134238	471978	8	0	0	3	1	1247259	0.0743484	1
CCDC126	389945	361	23	39078	10881	126594	2	1	0	27	124	7811193	0.0746134	1
BVES	108905	702	-1	103545	26442	154089	5	0	3	12	36	2415699	0.0752243	1
KRT85	936407	213	42	140946	41106	206856	7	3	5	13	82	2781168	0.0752844	1
CNGB3	191008	1171	2	231699	60801	751023	11	2	20	2	27	1121718	0.0753111	1
DR1	699815	223	13	50115	12948	46098	1	0	1	39	222	11436828	0.0753713	1
POMP	167695	629	37	41847	10569	97110	2	0	2	26	105	7335003	0.075394	1
RASSF4	75634	905	25	92898	24804	239265	4	1	3	8	35	2491866	0.0754564	1
LCE2D	169158	818	24	30771	8658	28314	3	0	1	40	278	11779911	0.075554	1
USP6	1391000	384	20	401934	105378	782847	13	7	19	7	54	2050971	0.0758485	1
TMEM176B	734961	689	14	75192	23088	195975	7	0	7	4	10	591240	0.0759066	1
SLTM	532170	212	23	296361	76518	443313	5	0	5	7	23	2358681	0.0759689	1
LHX9	98527	448	-18	112866	32448	155727	5	2	4	14	97	3424200	0.0763067	1
FAM71F1	875359	304	30	96993	27144	218556	7	3	3	6	25	1205295	0.076439	1
KLHDC4	594175	251	28	147732	40404	218205	10	0	5	7	36	1692678	0.0764957	1
GABRB1	106512	689	24	133926	36543	209079	7	4	4	2	15	710892	0.0765719	1
TMEM108	418705	773	10	151437	53079	113256	10	2	2	27	189	7696962	0.0765848	1
UBQLN3	99343	946	-2	174876	55848	21528	13	2	1	19	172	6425601	0.0770244	1
LHFPL5	621095	404	34	60996	17628	73125	5	0	1	3	11	421824	0.0771528	1
TSPAN2	595238	555	4	63726	17706	145899	3	0	4	8	65	2632422	0.0774356	1
KRTAP4-5	996799	468	-7	51012	13104	11466	5	0	0	50	358	8859357	0.077483	1
DCAF8L2	NaN	NaN	NaN	174954	47346	4680	11	2	0	8	117	3132870	0.0775021	1
HOXC12	1257445	274	23	74802	24765	23283	3	0	0	5	7	740610	0.0775386	1
CDON	611194	249	10	351468	101439	377325	8	2	5	5	21	2324790	0.0778617	1
WIPF1	463489	400	39	133185	46995	192582	7	2	3	5	32	1888497	0.077878	1
TOPAZ1	NaN	NaN	NaN	480519	122850	0	22	3	0	21	185	6424587	0.0780792	1
AATF	668463	384	16	161148	40911	266058	4	0	5	6	28	2299713	0.0781753	1
OR1B1	407749	646	9	83889	27963	11232	3	1	0	30	183	6794931	0.0781773	1
ANKRD29	331927	138	67	84435	25779	137943	2	0	3	19	100	7368192	0.0781987	1
OR5A2	417582	672	-4	87789	26052	20124	7	2	1	9	20	788307	0.0783222	1
FAM60A	317612	468	6	64389	15873	126360	4	0	1	16	97	5481099	0.0784939	1
FBXO21	206608	213	20	179400	46761	290043	5	0	3	1	3	359502	0.0786436	1
CD163	665695	608	13	326625	86970	364338	26	6	13	3	29	911625	0.0787775	1
KCNAB3	1794630	337	33	114699	33540	322803	2	1	5	5	39	2169414	0.0789242	1
MAATS1	368404	568	31	220935	56706	361413	8	2	10	4	34	1953783	0.0789307	1
BECN1	1633092	190	33	131157	32526	230256	4	1	1	3	10	901446	0.0789404	1
PAN3	265548	616	57	248469	71643	477828	5	0	7	17	45	4241601	0.0789704	1
NODAL	550900	338	42	95004	28314	40833	4	0	0	12	70	4275843	0.0790289	1
KRT15	1445853	325	-22	126360	37323	178191	9	1	3	6	36	1121796	0.0790661	1
GOLGA5	360146	405	41	207948	54600	251667	5	0	3	1	6	642408	0.0790823	1
CCP110	349996	491	21	282399	71877	303732	6	0	2	4	14	1657188	0.0796266	1
NUP133	249616	277	25	328731	89310	601731	5	1	4	6	30	2760108	0.0796305	1
KRTAP22-2	NaN	NaN	NaN	13260	3120	8541	2	0	1	6	103	2280213	0.079717	1
COX7A2L	251919	375	16	32097	9438	53937	2	0	2	50	232	11573406	0.0797744	1
ALG1	552298	419	3	131274	37791	304200	2	1	6	6	42	2463786	0.0798139	1
C8orf74	110362	481	9	81237	23946	24687	2	1	0	50	224	12388038	0.0799012	1
SLC13A4	471922	312	2	175617	51480	389493	6	2	7	3	33	1695564	0.0800386	1
LRRC7	298237	695	-26	434616	116688	601965	33	7	21	3	37	992901	0.0808228	1
FABP12	186546	595	0	40482	10179	44694	3	1	0	50	254	11884587	0.0808795	1
OR52N2	203856	922	-5	87204	25701	20826	5	1	0	9	44	1855113	0.0810619	1
JUNB	1937827	226	32	90168	31980	6435	5	1	0	50	304	11038014	0.0812628	1
MACROD2	37709	920	-12	135759	29796	606177	9	2	16	2	66	2398188	0.0814334	1
ELF1	291800	476	39	171288	49608	218790	4	1	2	19	73	4999020	0.0816277	1
CREBBP	637890	242	39	678795	192738	725868	17	9	8	4	21	1354314	0.0817946	1
MRPS12	1794625	282	21	37206	12519	82719	4	0	3	5	26	1194570	0.0818784	1
FRZB	330424	450	6	90987	25779	137592	4	0	1	15	61	4003194	0.0818927	1
C7orf33	473795	593	-4	48282	15132	83304	4	0	3	8	39	1989195	0.082121	1
DYNC1I1	184459	747	-7	185406	48828	441675	6	5	12	5	53	2217111	0.0821719	1
TMEM222	884974	188	30	59670	16263	187902	6	1	7	13	171	4847583	0.0823097	1
GDAP1	230695	529	-14	101868	26949	156780	4	0	3	10	37	2404116	0.0826373	1
PCDHA6	896676	606	-12	255567	81510	375453	12	9	0	3	29	1784952	0.0830617	1
C8orf31	821065	470	4	38259	10764	61308	3	0	2	23	97	4346433	0.083275	1
RSL1D1	558203	294	37	138528	37791	208611	3	0	1	4	19	1831245	0.0835952	1
LRTM2	245027	593	30	100152	31473	29367	5	2	0	7	20	1557660	0.0837121	1
FST	202521	488	-5	98943	25428	116532	3	1	1	50	197	11341005	0.0837954	1
CUTA	1441897	236	31	58695	19227	97812	3	0	2	44	271	11889150	0.0838504	1
PRPF4B	182705	353	18	286806	73788	304551	6	2	2	11	54	3616275	0.0838572	1
PI4KB	1256374	184	31	229866	66495	321633	9	3	0	3	16	1041768	0.0838866	1
HIST1H1C	408919	685	43	56862	18720	17199	4	2	0	10	17	949650	0.0838992	1
FAM209A	264053	455	-17	48672	13104	72540	1	1	1	17	34	2517723	0.0840053	1
AKR1B10	403585	319	21	91884	23595	263367	3	1	5	11	69	3702582	0.0840302	1
LAMP3	296133	596	24	113412	35295	156780	5	0	5	1	24	1188252	0.0841715	1
NWD1	947233	293	35	389259	119691	326547	19	8	10	6	47	1583205	0.0843607	1
PIKFYVE	256462	539	10	600327	156663	1021644	14	4	9	2	13	1311453	0.0844393	1
FAM71D	479620	324	19	118911	32838	177840	6	1	3	5	57	2275650	0.0844616	1
SPCS1	1217701	272	47	47034	14274	74997	2	0	0	3	6	1326195	0.0844704	1
KIF7	804572	319	27	365781	114387	198315	9	2	8	5	37	1560936	0.0845408	1
XIRP1	163147	452	44	490191	157521	21528	14	4	0	14	83	4667091	0.0849355	1
TRPM6	95662	726	-16	583752	149253	922662	27	4	23	13	118	4375566	0.0849976	1
FOXR2	89607	NaN	10	87399	22113	14859	7	1	2	2	10	327990	0.0851039	1
COL14A1	262056	839	-5	508950	143793	1156662	24	3	34	1	39	1348464	0.0852243	1
SMC5	196227	395	-11	320151	77883	471159	6	1	6	3	24	1702662	0.085262	1
ISCA1	311398	417	8	36621	10413	79677	1	0	1	9	32	1867866	0.0853119	1
B3GAT1	270422	686	5	90090	29835	52299	7	1	5	2	27	692328	0.0854827	1
YPEL2	1000345	452	16	34905	8619	93951	1	0	1	9	36	1784757	0.0855019	1
HIST1H4B	408919	685	43	27222	9516	17316	3	1	0	20	74	2550483	0.0856931	1
MYO3A	63308	873	-6	465309	117702	650052	35	8	32	2	55	1342848	0.0862154	1
DMRT3	83374	703	9	126126	40599	42003	6	2	1	6	20	1014585	0.0862446	1
AKR1B1	328321	415	9	92040	23673	194571	5	0	3	1	4	275340	0.0864979	1
INA	522257	125	41	133341	43329	50778	5	1	1	31	111	6604689	0.0865671	1
KCNK16	190767	749	31	119886	36543	101205	4	1	3	5	46	2910765	0.0867335	1
IGHMBP2	575839	253	48	272064	83616	310752	9	0	4	12	50	2783352	0.0868352	1
RBBP5	655446	431	37	154323	40950	327834	4	4	3	27	95	5922033	0.0869723	1
CLLU1OS	168575	582	19	29523	7917	101907	2	0	1	14	35	2463747	0.0871018	1
ZNF331	605686	808	-54	132756	31512	103428	7	0	5	11	36	1535508	0.087112	1
GDF9	702301	200	62	124722	35451	91962	5	0	0	9	19	1711554	0.0872585	1
HSD17B2	192405	635	2	107874	30420	115479	1	0	0	4	6	2499978	0.0872672	1
KLK3	655673	589	25	80496	24219	139698	3	1	7	11	64	1567449	0.0873616	1
KCNE2	410767	518	61	35139	8853	25623	4	1	1	2	6	359892	0.0876585	1
SPATA2	589377	181	48	140322	43251	46098	7	0	0	8	44	1971411	0.0877172	1
UCN	1245306	182	52	32214	12363	26676	1	0	1	23	138	5732025	0.0880204	1
NSUN7	238024	202	47	201240	56277	296946	10	1	4	5	24	1281501	0.0881099	1
SLC24A5	219744	588	-38	140478	39585	188604	11	3	4	8	84	2766426	0.0881176	1
LYPD6	105128	631	-8	48906	13338	105066	2	1	1	16	113	4127097	0.0883498	1
METTL21B	1160849	344	39	75309	22035	124488	4	0	0	10	42	2682342	0.0883579	1
BTBD9	295241	821	32	182559	49101	377091	6	0	3	2	9	745134	0.0883678	1
PGLYRP2	524410	481	33	152373	52260	60723	7	4	5	3	75	1606683	0.0883744	1
C16orf93	1632278	158	61	84474	22815	211770	2	1	0	6	41	2659722	0.0885953	1
FAM177B	221712	236	-4	46800	10881	103428	3	1	1	26	96	5755698	0.0886963	1
IFNA4	137739	498	1	52494	14430	25506	1	1	0	50	183	10023975	0.0892309	1
CSMD3	9197	1295	-29	1059201	282555	1514916	122	28	116	3	157	1972698	0.089403	1
TMEM26	84084	468	-19	101517	30342	122265	10	4	3	3	9	375336	0.0895268	1
SFRP4	100826	683	10	98163	25974	127413	14	2	6	1	14	230529	0.0896618	1
SH2D1B	363646	391	1	38415	9672	131040	3	0	1	4	15	1113333	0.090061	1
ING1	560003	274	51	127296	38493	40950	6	1	3	3	30	1231698	0.0901042	1
RABL6	1921909	176	44	225381	66066	321516	11	1	10	12	79	3992820	0.0901347	1
C12orf40	72641	714	-20	190827	43992	220779	11	3	6	17	78	3135678	0.0905856	1
DTWD1	206183	390	-22	87633	21294	75699	2	0	1	13	86	3918408	0.0905962	1
DKK4	535273	459	37	62907	17706	86931	3	1	0	6	27	1456767	0.0906852	1
KCNE1	381338	502	16	35529	10569	27846	4	2	0	1	7	358215	0.0906961	1
MICAL3	415161	288	11	623415	179907	461565	19	7	10	18	106	5449860	0.090889	1
RNASE10	464497	395	17	60021	16029	19656	3	0	0	50	295	15939144	0.0909875	1
FETUB	508316	436	45	106197	31278	170937	4	2	2	42	342	16548051	0.0910287	1
RAP1B	439623	356	37	54405	13806	276939	2	0	0	3	5	1235715	0.0910624	1
GDA	285414	207	11	131469	34320	347373	4	1	8	20	99	5010642	0.0913236	1
L3MBTL3	68020	844	23	228267	55692	420030	8	3	6	14	46	3083457	0.0913326	1
FBN2	226750	605	9	845715	206700	1547793	39	11	31	4	54	2507466	0.091359	1
IFT80	427333	617	9	225498	56472	369486	8	3	8	5	44	2013219	0.0915019	1
SH3RF2	396248	406	-7	197574	62400	315900	5	1	1	1	7	770094	0.0916558	1
C2CD2L	1390854	195	58	191763	62829	184977	5	0	5	9	64	3166449	0.0917953	1
ACSM2A	181483	823	6	163410	45552	352638	14	2	21	3	40	829257	0.0918805	1
SLC22A25	1852481	572	32	151554	44538	186381	8	3	8	8	54	1739673	0.0920138	1
YWHAH	531528	344	-1	68640	18525	49842	2	0	0	23	155	6820047	0.0921462	1
LATS1	431427	210	40	313989	85800	161226	8	1	2	24	75	5359224	0.0921637	1
OBP2A	327501	539	37	49959	12987	92664	4	0	4	5	26	638664	0.0922525	1
LSM3	303635	258	39	29484	8073	118872	2	0	3	4	18	1307943	0.0925245	1
VEPH1	202651	739	5	247884	64272	389376	15	7	3	13	78	3360045	0.0928913	1
DARS	440321	410	30	146796	36426	313794	3	1	5	8	29	1577511	0.0931231	1
TCEB3B	120831	639	34	203346	61308	25389	9	1	1	19	76	5046639	0.0931675	1
IRF8	407770	461	27	120393	33111	162045	6	1	6	4	23	1018719	0.0931929	1
DCC	2849	995	-34	404586	116766	691119	28	13	32	0	45	807885	0.0934009	1
C11orf70	420989	358	-16	66300	16770	110331	1	0	1	27	131	8404851	0.0934147	1
CEACAM7	1249321	499	27	74256	21216	114309	6	3	2	5	114	2105688	0.0936072	1
TMEM5	222270	460	-17	126165	32253	107757	3	1	3	16	42	2702973	0.0939162	1
NPFFR2	17885	811	3	146601	39078	73710	12	4	5	4	46	577239	0.0940271	1
MYADML2	NaN	NaN	NaN	79794	28548	0	3	2	0	6	104	2297100	0.0940494	1
CFHR4	211450	853	-31	95472	23634	279396	10	2	8	2	24	749073	0.0941814	1
TRIM77	NaN	NaN	NaN	128310	32097	0	12	2	0	6	104	2300649	0.0941862	1
FANCD2	885389	170	41	433563	112476	1122498	8	0	7	2	12	1591902	0.0942586	1
HSD17B4	302141	472	27	211848	57603	527904	5	1	7	9	35	2960607	0.094308	1
PALM3	NaN	NaN	NaN	182520	56394	0	9	1	0	26	199	8170695	0.0944912	1
TEX26	362646	555	39	84396	20436	126126	4	0	3	6	18	1485588	0.0946787	1
SGMS1	295850	573	28	116064	31122	117468	4	0	1	10	34	2380131	0.0947239	1
ACTG1	3582152	268	26	103974	30342	87867	4	1	0	13	68	2330874	0.0950808	1
ENY2	135626	732	20	30888	7020	144495	2	0	1	50	462	22277580	0.0951589	1
ATG10	156562	717	25	64896	15951	224640	1	2	0	3	12	1866852	0.0952327	1
AGPS	378489	434	26	190203	50232	380601	12	2	3	0	5	430833	0.0952587	1
ARHGDIA	3798594	211	19	59007	15288	53586	3	0	1	50	257	8810100	0.095534	1
EIF4A1	1957426	194	24	116532	31122	340821	3	0	0	1	1	639327	0.0955576	1
HAO2	409405	720	3	98358	28470	204399	6	2	10	8	42	1344720	0.0955954	1
DIO1	505734	319	24	70941	18447	81315	3	1	2	23	113	5304546	0.095732	1
ERI1	147910	440	44	100620	25038	90558	2	1	1	21	93	5926011	0.0958099	1
NTSR2	219483	336	21	108459	37440	84474	2	1	2	3	11	854022	0.0958753	1
ZBTB20	86308	644	10	202644	59202	79560	9	4	0	32	172	7349706	0.0958861	1
METTL5	338901	489	35	65754	15561	167076	2	1	2	16	63	5000658	0.0959361	1
DPP4	153730	528	9	226590	54327	630279	5	2	10	4	23	1996566	0.0959759	1
C17orf47	892839	376	10	152841	48048	71838	8	1	1	5	13	1017315	0.0962921	1
UQCR10	848649	195	37	22035	5928	20592	2	0	0	50	269	11082708	0.0963977	1
PLEKHO2	556478	205	50	133029	41652	94185	8	0	2	35	151	7332195	0.0964102	1
C8B	38776	713	-12	169689	43485	313209	11	1	12	2	66	2417571	0.0964191	1
WASF3	149391	643	10	139503	40794	314028	4	2	2	6	23	1782339	0.0968736	1
TCP10L	265057	182	52	60216	17355	116649	4	0	1	11	40	2594982	0.0969598	1
B3GALT1	67289	1010	-14	90597	24180	27261	11	1	2	3	14	281658	0.0970523	1
ADCY1	287931	686	11	306072	96174	438399	11	5	13	11	49	2410629	0.097109	1
WDR17	133039	616	-8	378651	99762	603018	12	5	18	7	82	2487030	0.0972349	1
SP140L	535116	642	36	173199	39390	339417	10	2	9	7	62	2438826	0.0973647	1
NPNT	262174	361	7	173745	47502	225225	6	0	4	21	45	3453723	0.0977162	1
LRRC36	1158788	125	49	213564	60801	334035	9	4	1	16	60	3518112	0.0977879	1
MPPE1	323758	148	39	112437	31122	169533	4	0	0	4	14	1757457	0.0979911	1
CCDC30	644678	461	21	229086	53118	327366	9	0	3	3	12	856908	0.098029	1
PPWD1	424356	444	25	184782	47229	204399	4	1	0	6	25	1911936	0.0980734	1
ILDR2	261602	681	-9	178191	50895	222066	6	2	4	11	51	2749344	0.0982477	1
THRB	370625	518	-12	132171	33735	263952	5	2	3	12	55	3063060	0.098281	1
CYTH1	986469	250	32	118014	27885	338247	6	0	7	3	12	618228	0.098326	1
ACSL5	184750	409	-4	212316	56784	540657	6	2	6	5	27	1704456	0.0983636	1
COBLL1	76781	413	-4	325923	89778	332046	10	0	3	2	13	965952	0.0984233	1
GPR84	664708	190	45	105573	34242	25740	3	1	0	50	314	13399386	0.0984959	1
NEFL	180048	521	-2	150306	42393	58734	4	1	1	14	46	2662296	0.0985033	1
MB21D2	34577	631	8	135369	37791	34866	4	2	0	30	202	7635849	0.0985626	1
ABHD3	269726	244	57	115674	31980	178659	2	0	2	21	80	6668025	0.0986221	1
OR4K5	431654	854	-49	86931	26559	15327	10	2	1	7	34	572481	0.0986793	1
ARHGEF6	306872	NaN	39	224562	57993	559728	6	2	4	6	25	1663077	0.0989398	1
APOF	2869106	184	52	87789	27690	45864	5	0	0	16	119	6038955	0.0991801	1
SLC24A1	501873	240	44	133263	35217	102726	6	1	1	45	219	11612640	0.0993408	1
ANO4	245388	937	-16	268476	66495	818766	11	1	16	1	17	948129	0.0993408	1
TRIML2	32696	595	-20	110682	28782	174096	10	7	7	4	26	605943	0.09937	1
C22orf28	392443	401	-6	144105	38649	317772	4	1	5	18	94	5541393	0.0993846	1
HIST1H4G	390169	544	57	26364	8619	16848	2	1	0	15	26	1886625	0.0994262	1
TCF7L1	973960	394	18	161733	50388	288522	7	2	5	8	40	2253771	0.0994857	1
SCIMP	1279084	384	24	42822	10530	126945	2	0	0	5	16	1617798	0.0996462	1
RHOXF1	NaN	NaN	NaN	51558	14547	69498	3	1	1	26	200	8198346	0.0996687	1
ZDHHC6	197289	325	3	120354	29172	186615	2	1	0	7	23	2618655	0.0997329	1
RALGAPA2	239875	869	6	531960	144066	492687	9	5	10	14	81	3739827	0.100144	1
ZNF114	1052191	391	32	118443	29679	87633	7	0	1	10	52	2104986	0.100217	1
SUMF1	155099	172	10	104988	30615	211302	6	0	3	3	9	965913	0.10029	1
LEUTX	NaN	NaN	NaN	46644	13377	0	2	0	0	50	752	26397735	0.100291	1
COL1A2	461036	499	-14	376350	127335	1031355	53	8	57	2	73	1423305	0.100422	1
FAM149A	373525	536	-13	134745	39936	237276	5	2	7	4	25	1276860	0.100453	1
TPTE	30271	1268	-81	162435	41145	603954	27	13	50	1	69	701883	0.100984	1
COL25A1	157338	437	-5	196950	59397	882765	12	3	29	1	35	1122576	0.10115	1
SH2D4A	145909	265	-11	134589	34476	161343	7	1	3	15	96	4826367	0.101296	1
TAGAP	509192	447	41	204087	58929	214578	7	3	2	7	76	5001438	0.101472	1
MSH4	146770	535	-10	266916	71097	404235	18	4	21	1	35	861120	0.101571	1
AADACL3	145424	454	23	98085	27222	118638	6	2	4	14	58	3116724	0.101664	1
TMEM251	325787	222	35	47034	13104	79911	3	0	0	11	27	2114658	0.101772	1
PCDHGA6	NaN	NaN	NaN	250419	81861	283608	13	5	0	2	20	888693	0.101935	1
TTLL7	157542	957	-14	256074	64506	428688	7	1	5	6	43	2880072	0.102229	1
SLC12A2	257189	531	24	340860	97071	737334	7	0	7	2	14	1487889	0.102285	1
ACVR1	81110	935	2	145002	38220	210834	5	1	3	9	23	1312935	0.102474	1
CRLF2	NaN	NaN	NaN	73749	19383	111501	2	0	5	6	107	2399436	0.102531	1
SDCBP2	417756	427	36	82017	24570	118989	2	2	0	22	97	5916456	0.102938	1
HIST1H3B	408919	685	43	36270	12051	49959	3	3	0	10	17	949650	0.103054	1
TMEM225	89099	736	-8	64467	16263	95004	7	2	3	4	23	650403	0.103148	1
KLKB1	371112	606	-2	184470	46254	278811	7	2	4	7	30	1506414	0.103357	1
CD151	1799017	232	51	72111	20319	102375	3	0	0	5	7	564837	0.103365	1
EIF1AD	3854361	208	57	48711	11895	169065	2	0	0	1	1	317967	0.103473	1
BANF2	594840	432	1	28782	7020	49491	2	1	2	5	25	1321710	0.103508	1
FAM3B	224593	506	24	68679	17433	175617	5	0	3	13	60	4196868	0.103523	1
GPR148	626077	372	11	91026	31356	21645	5	2	0	30	155	5312268	0.10358	1
CALD1	390559	513	17	234312	56901	262899	4	2	3	23	88	6744270	0.103957	1
NCF4	1261877	537	50	118638	33111	142038	4	0	3	23	153	5733507	0.103999	1
HS3ST6	1766472	214	39	81354	28626	819	3	1	0	21	100	4570878	0.104013	1
CA12	449769	275	47	101556	27729	180765	2	2	2	39	200	11547627	0.104182	1
PCDHA7	896676	606	-12	250068	81861	350298	12	5	0	3	29	1784952	0.104185	1
DHRS9	303546	646	12	88647	25545	95589	2	0	2	25	161	7489326	0.104258	1
SAMD7	400118	622	17	125073	35100	282789	13	3	8	1	12	389844	0.104285	1
PRDM5	19279	961	-16	185952	42549	325728	9	3	5	0	8	368277	0.104442	1
OPALIN	799460	684	38	42354	11583	211068	1	0	8	20	63	3067584	0.104443	1
BAZ2A	2782714	164	50	526968	155142	430911	8	4	8	18	109	6229080	0.104489	1
ZNF619	195638	546	22	175188	46293	81666	4	2	2	28	117	6500637	0.104881	1
TGM2	565545	141	41	196287	54561	250614	6	3	5	13	59	3236649	0.105027	1
CFHR5	217857	853	-24	163176	41106	186849	15	3	13	1	20	321906	0.105408	1
HSD11B2	1115833	153	42	107250	37128	42588	3	0	2	26	166	7660887	0.105444	1
SCAND3	239465	576	27	370656	96174	107640	11	1	4	10	61	2997072	0.10548	1
SPINK8	1054170	263	37	29601	6669	69264	1	0	2	23	192	4901988	0.105483	1
C9orf85	284245	358	5	47151	9711	79092	1	0	2	12	58	2950740	0.105577	1
CDKN3	332892	474	6	62127	15912	149292	2	0	0	6	17	2558283	0.105679	1
ZNF138	213856	1035	-19	106236	23985	141453	3	0	2	11	64	2710071	0.10569	1
CHRNA9	442913	347	53	134316	36270	137592	7	2	3	15	109	3602937	0.105696	1
SNRPD1	301496	165	46	33852	9672	135369	2	0	0	2	3	591981	0.10575	1
RAD1	241905	675	21	80808	20865	142155	4	0	0	6	22	2102373	0.1058	1
TRIM43	394116	611	16	128505	31200	50895	2	2	1	12	45	2398032	0.105965	1
CNTN1	22448	1105	-22	291681	76752	583011	8	5	5	2	18	1019148	0.106129	1
APOA4	419339	326	36	108966	31317	116415	7	2	1	7	55	2220621	0.106204	1
FLT3	346092	614	42	287898	71994	513747	13	2	18	3	30	1194882	0.106358	1
S100Z	246938	418	21	29523	6981	39663	2	0	1	50	264	12368148	0.106411	1
LUZP1	859705	169	25	293631	84864	42120	8	1	0	13	34	3214263	0.106435	1
SLC22A11	1970283	411	54	149526	48087	198432	9	5	8	9	115	2321709	0.106624	1
CTNND1	921177	497	8	272337	76674	294138	6	0	0	2	3	654459	0.106776	1
DDC	180088	561	11	137475	37908	310986	7	4	7	12	84	2931357	0.106906	1
GALNT13	21842	1035	-13	159744	40443	259389	13	5	15	2	37	686010	0.106928	1
CHCHD7	343112	552	19	39039	6942	78507	3	0	1	6	29	1174407	0.106943	1
B3GAT3	2695768	217	42	89271	30771	82251	3	1	1	37	220	10719306	0.106954	1
COMMD10	312789	981	8	58890	15405	160290	5	0	2	1	3	232791	0.107017	1
WRB	383982	346	44	50349	13182	87633	2	0	2	9	20	1643889	0.107317	1
NDUFAB1	536544	561	43	44772	12441	54405	1	0	0	16	109	5010252	0.10742	1
NR6A1	892645	345	29	137124	35919	303966	4	0	8	13	81	3991143	0.107436	1
HNRNPA2B1	915230	445	43	103545	25857	273663	4	0	1	3	7	1193244	0.108097	1
NUDT15	324467	567	34	46293	12558	36972	1	0	0	46	316	13498485	0.108143	1
NPHP3	211862	768	24	378534	101049	584298	6	1	0	2	5	1252173	0.108316	1
ICOS	122253	693	5	58188	14118	118755	3	0	2	27	120	5920083	0.108543	1
LRRK2	31336	994	12	725868	184860	976248	23	6	20	2	50	1938378	0.108556	1
ZFAND2A	774288	346	36	43524	9594	132444	1	1	3	26	104	4524117	0.108789	1
LAP3	271232	912	35	147303	40833	279045	4	2	4	5	14	793260	0.10882	1
REST	590352	569	37	305526	81510	60138	7	1	0	8	43	2263950	0.108862	1
SPON2	789524	319	29	90519	28353	74880	3	0	3	44	198	9077562	0.108863	1
MYO5C	534690	195	24	506727	123786	923481	16	9	15	14	60	3234036	0.108908	1
MRPL3	276806	843	15	99684	27027	258570	4	1	1	0	2	285597	0.108923	1
SLC39A12	94785	360	-9	194922	53586	272025	14	6	7	1	16	478920	0.109244	1
CRISP1	70111	1258	-4	73710	17316	171873	3	0	3	5	29	1190046	0.109245	1
NPB	3798594	211	19	32409	12519	32526	1	0	1	50	257	8810100	0.109414	1
SYT9	97813	941	-3	137553	37947	153738	6	3	1	2	13	776568	0.109438	1
KCNIP3	246871	498	14	84825	21411	206622	4	1	11	2	16	449514	0.109754	1
C7orf65	237253	211	21	42900	11622	64233	3	0	0	5	20	1757808	0.109815	1
TLN2	315754	568	15	711009	207324	1194687	20	8	34	3	78	2906007	0.109872	1
HEATR6	972352	235	18	327990	96018	430794	12	0	7	0	7	526812	0.110111	1
NAA20	225789	502	12	54210	13182	174915	1	0	0	6	9	1133457	0.110215	1
LPPR4	100692	868	-15	209586	61386	156312	14	1	6	12	87	3065517	0.110272	1
IPO7	566709	145	21	301860	74061	489996	4	0	2	5	9	1814982	0.110282	1
PRELID1	942017	227	53	61854	17238	194220	1	0	0	8	13	1462032	0.110323	1
C8orf47	630526	229	39	102999	29562	33813	3	0	0	8	30	2318823	0.110492	1
DSTYK	715889	277	39	258921	73359	377091	7	0	2	0	2	450450	0.110633	1
C1QTNF7	144115	540	20	81081	24102	54522	4	1	0	50	189	11908104	0.110782	1
DEPDC7	415951	215	25	151086	38220	193050	4	1	2	5	28	2041767	0.110917	1
LCE3D	285984	752	17	25584	7527	32877	2	0	0	50	307	12681942	0.110919	1
SBK2	1094560	399	4	91572	31746	20358	6	1	0	50	251	10523175	0.111208	1
RASA2	405454	259	28	247845	61503	411372	4	1	7	12	111	5652153	0.111353	1
CKMT2	182569	777	30	117351	34281	269802	5	1	0	3	26	2401308	0.111364	1
IGF2	837088	579	38	64896	20163	148941	3	2	5	10	44	1670526	0.111388	1
ZNF844	NaN	NaN	NaN	188565	46956	82251	7	2	1	26	201	8243508	0.111399	1
CLDN20	NaN	NaN	NaN	58812	18408	28665	3	0	0	26	198	8161374	0.111451	1
TMOD1	523548	420	35	103077	27495	224289	4	1	6	3	18	899145	0.111606	1
VWA3B	361135	716	28	369447	97734	733122	16	7	9	11	61	3565185	0.111667	1
ATP2A1	1167826	218	55	279747	83070	485784	6	6	7	7	60	2287155	0.111759	1
UHMK1	334603	248	3	122733	33813	165555	4	0	1	2	14	1497327	0.111783	1
MYH15	257473	874	3	562029	140790	1096524	17	10	15	1	27	1285323	0.111891	1
POU2F1	399046	569	0	204165	63999	353223	4	0	2	7	24	2471235	0.112083	1
RFC3	84617	580	33	106236	27612	199719	2	0	4	18	59	4617210	0.112092	1
TFF1	313101	464	90	24375	6630	26793	2	0	1	18	69	2897817	0.112128	1
DAAM1	156241	405	32	311883	78546	528606	4	2	8	30	111	8859279	0.112549	1
SHCBP1L	757638	424	20	183495	50271	261261	8	0	4	8	55	3257163	0.112646	1
PFN3	1038665	261	59	35958	12948	39195	1	0	0	11	81	2958891	0.112795	1
ROPN1L	628188	219	21	65520	17667	134316	4	2	1	25	96	4683588	0.112882	1
TLE3	300053	417	28	219063	61152	248742	8	0	11	3	42	1586793	0.113003	1
FAXDC2	525975	293	35	95433	25311	144495	2	0	3	20	114	6356298	0.113006	1
C4orf46	154316	534	-11	30654	9828	54405	3	0	0	4	39	1395420	0.113188	1
POTEF	347607	560	4	306891	77805	145899	6	0	1	3	34	2602197	0.113318	1
SSX7	250163	NaN	25	57057	12558	321282	3	0	7	11	53	3393897	0.113384	1
KCNAB1	502198	782	4	163371	45006	580788	5	2	5	4	20	1661868	0.113414	1
IRAK4	132735	558	-16	133224	33735	180765	5	0	1	7	17	1521000	0.11349	1
FAM105A	514082	380	28	102726	25857	157131	4	2	4	14	63	3501303	0.113866	1
CPEB3	423765	469	33	196482	56238	415584	4	0	3	1	3	589368	0.113897	1
R3HDM2	1862761	172	55	277290	75699	271674	10	2	9	4	16	859794	0.113924	1
ZPBP	135352	917	-13	100659	26637	178893	5	1	4	2	22	1257984	0.113968	1
WDR55	774470	356	31	106548	31044	108693	2	0	3	18	90	5810415	0.114259	1
ZSCAN31	273498	502	33	115440	29289	113490	5	0	2	6	13	1086501	0.114448	1
SOCS1	632841	308	37	55224	19656	5031	1	0	0	50	288	13091247	0.114633	1
INTU	211890	437	-11	265707	72423	327483	6	1	5	5	20	1263171	0.114826	1
PPP1R3C	276001	206	16	89193	22893	26793	3	1	0	50	190	9336132	0.115112	1
DSCAM	25449	971	-72	560742	160797	725166	51	19	28	8	118	2463123	0.115201	1
KTN1	687929	308	23	405951	92118	898677	8	2	8	6	76	5233293	0.115232	1
CNGA1	220829	474	40	215709	55029	142272	7	0	1	25	137	9811503	0.115318	1
NR2C2AP	940952	232	17	40248	10998	118170	1	0	3	15	99	3946371	0.115362	1
EMR3	1036916	384	31	186030	50193	391950	10	4	14	6	52	1438359	0.115514	1
TC2N	368236	478	21	140595	36894	214578	5	1	2	9	47	3327558	0.115518	1
STAM	488136	364	7	155571	40404	324792	4	0	4	4	28	1765920	0.115548	1
SCCPDH	439136	282	3	121875	34203	272727	3	1	3	6	26	2256345	0.115588	1
NOX5	370981	394	26	221403	62439	405639	5	2	0	1	7	725517	0.115604	1
YLPM1	878419	232	43	592683	170274	231660	17	5	6	23	143	5999136	0.115924	1
DEDD2	790787	299	37	85956	30693	59670	3	1	1	12	44	2601651	0.116155	1
CTSS	1818753	188	35	95199	24492	177255	4	1	5	13	108	3820557	0.116313	1
ZNF610	526380	960	-32	131547	32838	105651	7	2	4	6	27	793533	0.116402	1
DGKI	196508	861	-7	305877	83850	868140	23	2	45	1	48	1056822	0.116567	1
MSI1	1597755	182	50	105300	28899	261261	3	3	8	10	47	2532309	0.116576	1
TCEAL2	132641	NaN	4	64974	15522	23634	3	0	1	27	164	6098898	0.116943	1
OR4K17	383274	768	-37	93171	27573	10647	10	2	1	9	98	1514409	0.117184	1
DSCAML1	413931	624	44	582621	174603	650754	21	9	17	17	103	4027647	0.117226	1
NANS	484638	272	48	101088	27846	110916	2	0	1	30	123	7720791	0.117367	1
GCM2	263829	483	14	140946	39117	113139	6	2	1	25	98	4704375	0.117369	1
RSPH10B	NaN	NaN	NaN	507429	121797	3130803	4	0	4	0	4	3252600	0.117515	1
TBX20	154022	926	5	124137	36270	132678	8	4	3	5	22	564174	0.117584	1
APCDD1	219220	604	2	141921	40716	96525	5	2	1	20	128	6361446	0.117618	1
MYBPC1	348152	448	6	345579	87321	761904	23	4	20	3	33	1419795	0.117924	1
SLAMF6	1145424	590	26	94575	25818	232596	10	1	9	1	18	534222	0.118134	1
PCDHGB2	662513	568	2	250965	78858	325962	10	8	0	19	108	6518499	0.118319	1
OR2A4	129668	852	9	82641	26403	6786	3	0	0	50	330	12657489	0.118367	1
SLC2A10	292810	636	33	141492	50856	112086	7	5	2	15	40	1602432	0.118793	1
STX3	395993	494	8	89856	22464	202176	2	0	5	11	63	2934750	0.119263	1
FBXO16	295355	204	47	85254	21333	167544	3	1	3	4	15	1050426	0.119426	1
DDX41	1120311	347	41	177879	48516	293787	5	2	6	18	91	4420650	0.119443	1
TTLL12	624112	241	48	182091	50622	238914	6	3	2	17	82	4467372	0.119534	1
FNDC3B	327135	466	25	340704	93951	681057	8	1	1	2	5	1406769	0.119661	1
RER1	561270	302	24	56940	15015	186030	1	0	1	20	86	4644042	0.119679	1
UBE2QL1	NaN	NaN	NaN	44655	12675	0	1	0	0	50	752	26397033	0.119803	1
TCF20	1257937	305	43	536055	156468	113841	27	6	1	5	28	2076165	0.119842	1
FAM19A1	121492	954	-14	38883	10023	183690	3	1	4	9	83	3663075	0.119859	1
DPPA5	732413	446	18	33189	9048	48555	1	1	0	6	10	680316	0.120191	1
GNAS	1025539	416	11	418743	55107	320463	19	3	8	11	29	1400763	0.120292	1
MGARP	384151	208	24	65910	20085	65052	3	0	1	20	87	5035095	0.120331	1
SAV1	458995	259	31	107367	29289	93951	2	0	1	10	28	2795871	0.120375	1
GCLC	363341	337	24	184158	46800	324207	3	0	5	28	93	6227871	0.12066	1
BAGE3	NaN	NaN	NaN	33111	9477	420849	2	1	0	0	1	430326	0.120895	1
DTYMK	1323203	406	32	59514	17121	77688	3	0	0	14	76	4216056	0.120907	1
DEFB125	86	430	NaN	42861	12714	63297	5	0	0	1	0	131430	0.121125	1
FUBP1	373296	256	1	183846	51675	378963	5	0	3	4	20	1488513	0.121145	1
SGCZ	3398	1175	-34	88101	25038	287586	9	3	8	0	11	312624	0.121149	1
C17orf97	248876	591	1	26559	9477	31005	5	1	1	2	7	221949	0.121271	1
CXCL14	493676	608	26	31980	8736	54639	1	1	0	14	152	4099953	0.121352	1
NEUROD1	210899	380	17	98280	27495	37206	5	0	2	22	85	4324905	0.12141	1
HECTD1	431156	164	26	733200	202917	821340	14	2	11	23	78	6569355	0.121632	1
GPR87	NaN	NaN	NaN	99996	27183	49140	3	0	0	2	15	599547	0.121648	1
SLC7A1	222765	467	9	173550	52728	209196	5	1	1	13	35	2988141	0.121729	1
HPGD	62916	536	-11	77610	18915	142155	3	1	0	1	6	309660	0.121751	1
SDPR	158359	484	4	117234	32760	31707	6	1	1	47	211	11039691	0.121763	1
CDA	631461	208	35	41769	11232	66339	3	1	1	9	60	2550912	0.121825	1
QRSL1	227264	174	40	149058	41301	267345	4	1	4	29	86	8089458	0.121946	1
CD3EAP	1259254	191	39	137436	43095	52884	6	0	1	14	50	3220425	0.121971	1
LIN7A	27634	987	-4	65247	18993	94770	8	0	6	3	28	844701	0.122393	1
ST3GAL3	939679	230	33	127764	34047	472797	5	2	5	0	7	506844	0.122568	1
CDR2	483001	235	50	127335	34242	138762	4	1	0	2	13	951210	0.122897	1
LRIT1	216124	810	-10	165945	54717	59436	8	0	3	1	11	687180	0.122997	1
ROPN1B	215425	583	27	60177	16926	112437	3	1	1	8	35	2215317	0.123342	1
SAA1	601955	371	17	35256	9321	62127	2	1	0	13	59	3082170	0.123409	1
TRA2B	978158	213	30	81588	23595	213642	3	0	4	14	59	3045627	0.12409	1
CTSH	421272	488	45	98826	24492	195507	8	2	3	1	5	325611	0.124144	1
ADAMTS2	1496298	677	-4	344916	99099	360243	12	4	13	6	30	1257477	0.124538	1
MUL1	573203	429	30	96486	28821	90207	2	0	2	10	58	3444090	0.124567	1
OR52K2	264090	862	-7	84045	26988	15678	5	1	0	41	452	14883063	0.124708	1
FNDC4	1193266	306	39	65091	20202	214695	6	1	7	10	97	2790333	0.124835	1
RPL24	548150	419	13	46137	12129	123201	2	1	0	4	6	909168	0.124851	1
GIPC2	412519	265	-6	88062	25194	275886	4	0	1	5	15	1369953	0.124919	1
VWA8	259442	557	50	541047	149019	967122	13	7	15	25	133	7571343	0.125023	1
FMN2	55160	851	-26	460746	151983	849069	63	21	36	2	74	1199835	0.125085	1
SEPT8	717720	356	59	151047	36855	257049	4	0	10	8	31	1658046	0.125439	1
ANXA11	366637	626	7	142116	42042	265707	6	0	8	0	8	307749	0.125589	1
BPIFC	371339	401	3	144768	40092	334737	7	1	6	14	106	4079049	0.125863	1
RBM6	1079795	152	39	320346	83538	494793	6	5	8	4	47	2900157	0.125875	1
SLC26A7	79500	987	-11	193752	51714	451035	12	3	10	2	20	856284	0.125941	1
KRTAP5-5	NaN	NaN	NaN	64740	19032	38727	4	0	0	26	198	8172060	0.126222	1
CCDC115	360632	593	5	49842	15561	126360	4	1	4	1	5	166491	0.126312	1
BMP4	252916	645	-3	111228	33267	56511	3	0	0	8	15	1205100	0.126416	1
PCDP1	309897	441	17	161967	40326	331110	8	3	9	6	66	2418702	0.126571	1
NPAS2	339144	406	14	233883	65052	488358	8	3	11	7	31	1967901	0.12669	1
CSMD1	10896	1290	-36	992004	269724	800982	95	33	84	2	128	1162473	0.12678	1
KIAA0753	462930	285	10	274482	73710	474786	5	2	4	2	10	734682	0.126801	1
TRIB1	322911	193	40	99918	31941	51246	4	0	0	10	24	2534571	0.126861	1
C12orf50	152672	507	-36	122616	28197	254241	3	3	7	14	83	3620214	0.126867	1
HBG2	109545	1056	-1	41418	11934	40833	4	2	1	10	54	1674816	0.126886	1
SPATA24	NaN	NaN	NaN	61035	14079	0	3	0	0	50	752	26398437	0.126984	1
NEUROG2	186926	647	22	71136	25038	17784	2	0	1	6	54	2599194	0.127351	1
RIMS2	198819	1035	-8	398112	109200	976014	25	6	24	8	77	3127254	0.127489	1
VWA2	290609	437	21	196950	63024	327834	6	1	2	1	3	635271	0.127691	1
TEX101	357202	182	-39	74373	22035	132561	5	0	4	20	161	6647628	0.127732	1
RBKS	933934	279	32	90792	26091	159120	4	1	3	34	190	8347989	0.127768	1
TMEM170A	490399	133	16	39234	12831	45981	2	0	1	22	68	5281224	0.127815	1
POLR3F	414549	436	23	92586	22425	184275	2	0	2	16	57	6664203	0.127848	1
PDZK1IP1	364960	414	3	32565	9204	33462	2	0	1	35	201	9902217	0.127942	1
ALDH1A1	344512	542	1	143169	38883	273663	5	4	6	8	47	2066610	0.128186	1
CCDC176	469337	158	45	155415	35763	198432	3	0	5	23	76	5000580	0.128326	1
C10orf105	NaN	NaN	NaN	35607	11895	170937	2	1	7	6	110	2451384	0.128389	1
HIST1H2BH	390169	544	57	34203	10608	37674	2	0	2	14	20	1230177	0.128581	1
SLA2	1019481	176	62	76167	19071	234936	4	0	3	12	41	2560701	0.128612	1
ACMSD	275440	496	15	98046	24687	244764	6	1	4	4	13	810966	0.128739	1
TRIM16	471003	431	-19	157989	42666	105417	4	1	2	14	72	4056390	0.128765	1
HIST1H3C	408919	685	43	36192	12129	66807	2	0	1	12	18	1171989	0.128778	1
KRTAP5-10	586193	626	50	55224	16263	39078	2	1	1	17	75	2680392	0.128896	1
RAB30	307557	285	13	58266	15210	106236	2	0	0	5	17	1687959	0.128896	1
NIF3L1	635570	201	31	107913	27573	164970	4	0	0	2	4	665145	0.129012	1
C12orf74	208773	509	-1	52260	16770	38961	3	1	0	50	207	10855884	0.129016	1
CEBPZ	488101	253	42	304785	73008	338832	4	0	6	24	83	5554341	0.129343	1
EXOG	373229	578	28	103506	28587	128817	2	0	0	12	49	3448146	0.129448	1
STAC	151436	827	-17	116727	29640	189774	7	1	6	2	8	473889	0.129519	1
MGAT4A	319617	696	36	165243	40911	309699	5	3	6	4	23	1514799	0.12962	1
SLC35A3	287540	530	9	91104	26598	123201	1	1	1	8	18	2276664	0.129685	1
SBNO1	1090982	125	37	397800	105534	626535	6	1	8	11	80	5341713	0.129885	1
RUNDC3B	287293	839	-3	135798	35724	204984	5	2	3	4	50	2098707	0.129895	1
TMEM207	163494	373	9	41340	12363	120978	2	1	5	3	29	1123590	0.13002	1
UBE2D3	380953	471	41	52416	12636	214578	1	0	1	6	22	1450761	0.130128	1
TAS2R42	311688	617	7	86151	24414	9711	2	0	1	9	47	2561949	0.130177	1
CES1	317734	581	-28	160524	45279	276939	9	2	4	4	21	944073	0.1303	1
EXT1	190467	586	18	211029	55848	272610	3	0	5	17	45	3826446	0.130424	1
HINFP	1324478	195	58	148512	37518	172224	5	2	2	8	62	2870517	0.130454	1
ZNF281	264057	431	9	246558	68406	14859	8	1	1	8	44	2182479	0.130482	1
CCT2	484023	382	5	153114	42276	353457	3	0	7	12	56	3707184	0.130516	1
CCL7	26189	889	-12	28821	7449	75933	2	0	0	2	47	1895049	0.130857	1
USP32	913326	361	6	459342	119457	899496	8	2	9	6	23	2030847	0.130979	1
ZNF474	69953	707	2	99450	28665	27963	3	0	1	50	274	9881391	0.130984	1
UBE2G2	754837	213	48	49140	11700	98865	3	1	1	6	39	1977066	0.131357	1
TNPO1	469585	388	30	261495	65286	481221	5	0	2	0	2	546507	0.131363	1
LIPH	953031	366	31	129246	33618	250614	3	0	5	4	13	773838	0.131441	1
POU2F2	855248	369	32	130884	38298	206388	3	3	9	10	65	2292732	0.131496	1
TRAPPC9	327071	689	16	347334	100893	479700	8	7	4	8	35	2765256	0.131509	1
TUBB1	978901	125	28	125424	34632	83187	4	1	1	18	107	4747782	0.131755	1
CNKSR2	90158	NaN	-2	297141	76791	395577	16	5	8	4	25	1205763	0.131853	1
DNAJB7	NaN	NaN	NaN	87126	21684	25974	2	0	0	26	198	8161959	0.131927	1
HSD17B14	1766061	211	34	74451	24414	218439	3	0	6	26	155	5086770	0.131951	1
CDKN1B	791330	136	44	55536	15249	71253	3	0	0	3	4	406731	0.131963	1
CALHM2	542721	170	51	86424	27768	51246	2	0	0	15	69	3386019	0.132144	1
OR1L4	409923	553	12	84201	25311	16263	4	1	0	50	256	10572120	0.132144	1
ADRBK2	149272	580	-13	203151	48048	621387	8	2	6	2	12	1195857	0.132158	1
EFHB	103479	720	-15	235443	62907	241839	10	1	7	15	143	5479422	0.13236	1
RIC8B	230956	396	11	146211	40404	186381	4	0	2	23	125	6712251	0.132415	1
ME1	173617	711	-13	162786	44421	344565	5	1	2	8	35	2763033	0.132452	1
RAB3GAP2	651142	476	4	400101	105105	1001403	9	2	10	2	29	2108223	0.132598	1
PYROXD2	142644	581	4	163176	48360	359073	8	3	7	19	63	4030767	0.132833	1
FGF10	107231	886	-39	58734	15561	50076	6	0	4	10	78	1586169	0.133015	1
STAG3	1382416	198	55	350766	95472	848952	10	3	8	1	20	1429818	0.133103	1
HMP19	101001	533	23	48477	13767	90675	2	1	2	16	45	3049566	0.133111	1
KLLN	NaN	NaN	NaN	46878	15951	28197	1	0	0	26	198	8158449	0.133332	1
SERPIND1	435437	288	41	139776	37596	119457	6	4	0	5	48	2562729	0.133389	1
C10orf35	824126	519	31	32799	10959	36270	2	2	0	10	37	1695252	0.133464	1
CA3	100997	1460	-18	74724	19929	131040	3	0	0	8	18	1656564	0.133588	1
ENTHD1	818387	503	24	169299	46449	223587	8	1	1	3	3	469833	0.133781	1
DEFB112	65301	1242	-3	32448	7917	30420	2	1	0	21	149	6087978	0.133982	1
DYDC1	352963	598	18	53469	12051	104364	3	1	1	13	69	4450407	0.134105	1
MED30	139000	574	0	50466	13767	109863	3	0	2	50	245	12018903	0.134257	1
NEBL	71095	484	-19	336804	75504	909090	7	4	11	4	19	1355640	0.134306	1
MNDA	97345	985	2	115869	30147	145665	13	5	4	3	28	530790	0.134456	1
C3orf67	146530	837	19	161967	41613	266292	4	0	9	8	42	2539524	0.134715	1
RCN2	335583	614	27	92742	21684	124137	2	0	3	50	339	16688763	0.134925	1
FAM208A	209166	363	34	481494	122811	302796	6	0	5	5	24	2520531	0.134942	1
IL1RAPL1	11003	NaN	14	198237	51324	210717	12	5	8	4	22	559065	0.13498	1
SIAH3	820469	632	51	73788	21684	57564	2	0	2	9	61	2845011	0.13523	1
OASL	1225663	380	40	145821	37518	142974	6	3	2	16	93	3926247	0.135292	1
EPHB3	1325702	411	47	275028	82641	254358	12	1	4	14	67	3327753	0.135356	1
RNF167	1416161	231	30	97461	29484	247338	2	1	1	7	36	2472327	0.135526	1
MARCH11	160001	888	-24	109473	33384	49491	3	1	1	6	51	1325532	0.135731	1
PCDH19	128045	NaN	-15	310986	94653	85527	13	1	3	6	38	1852500	0.136202	1
SKIV2L2	344578	395	38	302601	75894	587691	5	0	5	13	27	3563742	0.136324	1
MRPL17	424776	548	8	47931	14781	73710	1	1	1	20	137	5830032	0.136444	1
BDH1	685310	263	39	96018	27534	136656	4	0	4	3	15	709722	0.13655	1
PMCH	229712	552	12	47424	12246	71838	3	0	0	13	56	2564172	0.136594	1
GTDC2	331914	493	28	154089	49842	10530	3	1	0	50	310	15185742	0.136621	1
CALML5	769552	446	17	39741	11856	10179	2	0	0	48	314	13355940	0.137511	1
CPN1	1067171	188	51	129207	35646	219492	6	0	7	9	51	2035566	0.137637	1
ZNF391	143920	645	19	101361	25233	17082	2	0	1	25	125	7092462	0.137709	1
OSBPL3	254504	312	28	256230	65286	588159	5	2	7	23	103	7458165	0.137709	1
DDIT4	808655	145	40	62010	20709	47970	1	0	1	46	165	8919300	0.137728	1
FAM221B	847663	227	54	113685	30342	104130	4	0	2	43	133	8027643	0.137759	1
C11orf54	290677	527	0	76908	19734	224289	3	0	3	4	14	764634	0.137899	1
REG3G	21996	1408	-29	50973	13143	140751	10	1	20	0	21	153894	0.137948	1
DERL3	637355	196	52	75816	22932	42120	2	0	1	50	295	11614005	0.138047	1
BACH1	315733	289	60	205491	55068	64467	6	0	0	3	8	1041027	0.138112	1
DLG2	57955	1000	-20	300456	78039	1184976	17	7	22	0	29	1263015	0.138332	1
PUS1	383304	269	30	117702	34866	65403	5	1	1	50	321	18046743	0.138587	1
DOC2A	NaN	NaN	NaN	112008	33423	107289	6	1	5	6	108	2409264	0.138765	1
PMP2	191177	595	1	38727	9594	92196	1	1	4	8	74	2333994	0.139148	1
ELOVL5	379445	287	27	86580	21996	150696	4	0	0	6	26	1893099	0.139207	1
CLGN	134135	752	4	179400	41613	279162	8	2	8	4	20	632736	0.139303	1
PLXDC1	1452583	212	26	143091	38844	250146	4	1	8	5	45	1799460	0.139778	1
GPR50	215822	NaN	-7	166608	51012	53820	8	1	0	4	15	1058616	0.139843	1
RNASEH2A	1937827	226	32	84513	24297	122850	2	0	2	17	79	3742518	0.139921	1
PBXIP1	1612870	224	35	202410	59202	216918	8	1	4	10	36	1656564	0.139922	1
FOXL2	345888	340	21	98787	33540	27612	2	0	0	31	123	8521227	0.140121	1
GNL3	1217701	272	47	160836	39702	316953	2	0	4	3	6	1326195	0.140255	1
ASPRV1	844060	221	37	91650	29094	32175	4	1	1	23	101	3972462	0.140349	1
LARP1	549658	179	27	287703	78975	433485	5	2	8	4	18	1521273	0.140566	1
TPD52	211901	353	43	73203	19578	188136	2	1	1	5	21	1457157	0.140959	1
MROH9	385644	965	-9	260247	66651	365976	12	3	10	5	31	1016496	0.141052	1
NCL	1052303	216	43	203541	52104	425997	5	0	4	0	4	478101	0.141149	1
FAM183A	1068006	294	30	39702	9555	48321	3	0	1	7	86	2532192	0.141286	1
ZNF280B	201933	683	23	151398	40014	24921	6	1	0	50	454	22688562	0.141304	1
SCP2	609222	386	23	162279	39663	616824	3	1	7	2	12	1226511	0.141318	1
ZMAT1	262044	NaN	16	183612	43251	129870	4	1	0	6	40	2831205	0.142141	1
CSN3	201562	928	3	50622	15483	48555	2	0	1	6	19	1551459	0.14218	1
LYPD3	368705	182	-29	93405	30264	88335	4	1	3	13	71	3481140	0.142279	1
NRSN1	349698	825	-21	53859	15873	55107	9	2	7	2	25	258063	0.142279	1
C3AR1	142724	300	23	130572	39429	33345	5	2	0	13	42	2616978	0.142367	1
LGALS12	887496	459	31	94224	28158	192114	6	4	0	7	29	1531803	0.142635	1
GSKIP	328104	560	12	39468	10491	37323	2	0	1	40	295	11759553	0.142812	1
GATC	1563159	216	45	38298	11661	132678	2	0	1	4	5	662259	0.142819	1
EFEMP1	376977	264	-15	141570	36504	232362	5	0	1	6	18	1412619	0.142971	1
C11orf84	1320765	201	47	104754	31668	65637	4	1	3	1	22	1237938	0.143123	1
RHOD	1615307	162	47	59007	17160	66573	1	0	1	48	254	11058216	0.143185	1
BAGE4	NaN	NaN	NaN	13221	3510	420849	1	0	0	0	0	424359	0.143246	1
SLC28A2	494393	471	23	186030	53235	417105	9	2	11	5	44	1813734	0.143249	1
TENM3	144640	636	-20	748800	211302	404469	18	8	8	4	58	2708433	0.143253	1
CCAR1	859993	256	45	331773	83460	479700	10	0	5	0	5	563160	0.14332	1
VPS13D	490718	340	28	1230450	342381	1696968	25	11	17	8	59	4062981	0.143341	1
RPRD1B	582740	137	45	91728	25857	183222	3	0	1	7	15	1829568	0.143576	1
XKR4	93897	925	-13	176748	52923	274716	10	4	2	3	35	1382589	0.143598	1
RPAP3	429377	382	5	193908	47346	325143	5	0	4	6	28	1909518	0.143713	1
DEFB113	70183	1258	-7	23322	5343	28431	2	0	2	5	27	837681	0.143742	1
MAPK1IP1L	837637	144	39	64194	23556	82134	4	0	0	16	62	3489369	0.143905	1
ABCA12	526764	857	9	740766	198159	1164618	9	3	9	2	26	2656875	0.14427	1
LUZP2	1913	1282	-32	101673	25272	224289	5	0	1	0	1	249561	0.144324	1
TMEM127	904852	213	43	63687	21138	144027	1	0	0	8	38	2368665	0.144607	1
FAM194A	359484	397	30	191022	48594	307242	12	2	8	1	16	645762	0.144667	1
CTNNAL1	337834	433	14	211029	55614	313443	3	2	7	12	54	2709252	0.144888	1
POLG	636068	420	24	346398	98670	427752	5	0	2	7	26	3266016	0.144896	1
CASQ2	287179	639	8	117936	27144	248742	4	0	3	11	36	2394249	0.144902	1
FBXO8	64734	647	-5	91728	22932	90558	2	0	2	7	49	2866383	0.145114	1
C18orf32	236267	352	55	22308	5655	115713	1	0	1	50	133	11233131	0.145481	1
LOXL2	484892	288	41	219999	58110	270270	9	0	5	3	10	985257	0.145684	1
CAPN6	132204	NaN	23	182988	47970	298116	9	3	3	2	9	592800	0.145706	1
DZANK1	414892	436	2	214929	58734	433836	6	0	9	15	86	4177056	0.145964	1
CLSTN1	614159	177	31	278577	74529	468351	5	0	12	5	25	1740687	0.145984	1
UGT2A3	NaN	NaN	NaN	148395	39507	133848	11	4	3	6	109	2441907	0.146494	1
LEAP2	686574	200	66	22269	6279	73359	1	0	1	39	129	7501962	0.146585	1
RPA1	1473497	224	18	177489	46566	409968	6	0	9	6	47	1933152	0.147001	1
LARP1B	232013	314	13	275223	69576	485550	6	0	10	15	54	3934476	0.147007	1
SPTLC2	500852	320	40	158340	44421	261378	7	3	4	5	21	1370109	0.147011	1
PPIL1	836025	244	43	47385	12636	76284	3	0	3	37	234	9023430	0.147536	1
C10orf107	79162	310	-21	61737	14430	134667	4	0	5	19	81	3512964	0.147553	1
GPSM3	2119974	392	28	44148	14235	193518	2	0	1	12	41	3601299	0.147631	1
GABRA4	104768	839	15	154908	43641	189306	8	1	5	1	11	611169	0.14767	1
C2orf73	659505	429	8	81783	21411	38727	4	0	1	9	29	1712919	0.147836	1
ALG8	551110	208	23	154986	43212	198198	2	1	2	21	79	5265585	0.147979	1
FAM220A	NaN	NaN	NaN	69615	22113	21528	4	1	0	50	753	26427999	0.148031	1
ANKRD26	390573	459	24	499356	116649	621036	8	1	3	0	4	737685	0.148158	1
RASAL2	168177	435	-9	361998	99801	549198	10	2	7	7	43	2725047	0.148328	1
SEC24D	248929	623	24	292227	80652	502749	4	0	0	2	4	1435824	0.148476	1
C14orf177	157823	938	-42	35568	9594	34047	3	0	1	1	6	375531	0.14853	1
SSH3	1369264	177	44	183144	54600	219843	6	1	4	7	56	1872897	0.14894	1
CCDC41	181169	690	25	205140	48165	456534	3	0	4	4	20	2225574	0.149134	1
NLRP14	418263	881	-4	309855	79287	277524	13	3	9	5	22	728637	0.149377	1
SUV420H1	1059031	161	51	250965	65403	252720	8	1	2	1	6	695955	0.149394	1
GTSF1	642618	190	38	51441	11271	175851	2	0	7	2	19	739791	0.149494	1
GPR155	405127	409	30	245778	66963	339417	6	0	6	42	166	11617086	0.149746	1
FOLR4	424538	765	-12	68991	17940	65754	2	1	2	5	28	1501071	0.149765	1
NDUFS5	682309	208	26	30888	7605	33930	2	0	2	2	19	901797	0.150013	1
KIAA2026	349735	317	26	569634	172146	72306	6	1	0	2	3	1051947	0.150045	1
SETD7	400132	191	15	104559	27534	181233	3	0	1	7	13	2136537	0.150176	1
SLC5A7	122653	911	-16	159861	47814	192348	8	5	3	7	37	1463592	0.15036	1
CHCHD5	590285	166	36	31590	8775	71136	1	0	1	39	196	10265541	0.150484	1
NFE2	753625	205	59	99372	32838	41886	4	0	0	2	1	546507	0.150645	1
SRA1	706371	319	29	65637	19422	176085	1	1	1	10	27	2066571	0.150669	1
C17orf50	675201	196	3	48087	14508	26676	3	0	0	50	254	13516581	0.150743	1
ZDHHC4	946573	387	40	97110	27027	169299	4	0	5	18	93	4098510	0.151164	1
CT47B1	NaN	NaN	NaN	81159	25077	59904	5	1	0	26	199	8199282	0.151363	1
ATF2	347113	641	24	142350	40872	265824	4	0	3	14	67	4945941	0.1514	1
TM4SF19	1164213	231	36	56901	18564	75231	3	0	0	1	2	229125	0.151432	1
CYP2A7	1187304	275	31	140439	38220	213759	11	4	14	1	34	513864	0.151435	1
GAS2L3	197479	849	-12	191685	56238	341523	6	0	3	0	3	397761	0.15145	1
DHTKD1	341646	227	25	258414	72228	417105	4	3	5	17	59	4528953	0.151534	1
SPOCK3	7931	1043	-11	128934	29367	274599	15	1	8	0	9	303966	0.152245	1
OR5AP2	NaN	NaN	NaN	86580	24687	9126	5	2	0	6	104	2302365	0.152481	1
RNF122	91655	610	11	46020	11076	131625	1	0	0	3	12	773448	0.152551	1
BAAT	112947	898	-22	114153	34320	57681	8	1	0	11	67	2449707	0.152582	1
PLEKHM3	331278	370	20	213135	57135	181350	4	0	2	7	32	2817867	0.152739	1
ARL8A	649164	297	34	54912	13533	154908	2	0	4	5	21	997815	0.152758	1
RRP8	424523	491	17	126828	36621	112905	4	0	1	4	22	1409343	0.152835	1
LYZL6	703538	424	31	42861	10842	113022	1	0	0	5	10	1942005	0.153187	1
ECT2L	336688	610	20	260286	66378	516906	7	2	4	4	22	1464840	0.153463	1
LAMA4	131437	282	-7	534729	142467	976716	14	6	17	2	35	1697046	0.153628	1
COL22A1	5667	846	-22	455052	145977	1516671	50	14	104	3	138	1984788	0.15366	1
C19orf40	481910	448	-16	60177	17511	94419	3	1	1	19	149	6165315	0.153676	1
MORN5	220092	528	30	48087	10881	158886	1	0	7	7	59	2325258	0.153862	1
HAL	366272	436	8	187083	53235	430911	6	2	9	6	29	1443546	0.153898	1
TTC13	407409	595	14	247026	65715	550017	6	2	9	3	16	1262352	0.154116	1
SHH	213448	634	23	122070	41613	65871	7	2	2	2	9	382746	0.154383	1
CLMP	713809	216	13	103038	31044	235755	4	0	0	3	10	1233999	0.154518	1
DMXL1	305800	381	28	853047	229437	889551	13	4	11	9	31	2835105	0.154759	1
FOXRED1	385871	426	29	135642	40209	403065	4	1	2	9	42	3087357	0.15476	1
C2orf42	677043	143	42	160212	45357	190242	5	0	5	17	127	4760028	0.154776	1
LRRC59	1335838	196	24	85605	25311	182286	3	1	3	13	70	3283020	0.155215	1
GABPB2	1614665	165	40	124371	36738	200772	7	0	1	3	6	770289	0.155427	1
CASD1	446033	469	3	230256	57798	414648	9	1	3	0	4	472446	0.155519	1
DESI2	718652	540	-1	55341	14976	165438	2	0	1	1	1	287391	0.155945	1
HELB	237928	773	5	307398	80574	305955	4	1	4	5	19	1652118	0.156184	1
CCBL1	1706086	201	24	122070	32019	220194	5	1	3	4	68	2455362	0.156223	1
GPR112	380446	NaN	28	830973	261222	569205	12	8	10	13	67	4100733	0.156309	1
BTN3A3	384310	375	47	163176	46371	219375	5	1	2	1	3	518466	0.156482	1
CTAGE5	314800	300	16	236964	59748	578682	5	0	7	7	28	2308800	0.156536	1
UGT2B4	18715	1044	-22	148785	39468	173394	11	2	5	3	24	743769	0.156543	1
CACNB3	1655612	214	57	137163	38688	243711	4	1	3	8	40	2303067	0.156563	1
TUBB4A	851008	212	27	122733	34866	45747	8	3	2	1	21	548223	0.156568	1
SLC30A7	173324	727	-4	108810	28665	325611	1	0	3	7	16	2170350	0.156599	1
CISD1	153256	357	-17	31395	7800	55458	1	0	0	35	192	10767003	0.156877	1
RPS28	778783	209	14	20163	6045	50193	1	0	2	7	35	1727895	0.156995	1
C19orf47	1006719	289	35	97734	30498	126477	3	0	2	9	56	1942707	0.157302	1
ESYT2	286663	344	1	250458	73398	529425	5	2	2	1	5	640614	0.157378	1
FAM19A2	136152	930	-44	38298	9789	322101	4	1	4	1	6	375531	0.157399	1
GABRA1	12179	927	-16	129168	35451	213291	11	4	18	6	58	719511	0.157568	1
PGK2	67972	1246	2	113373	33345	22230	7	2	1	6	14	587574	0.157627	1
ZNF124	374414	704	-12	83889	19305	67158	2	0	0	5	26	1358487	0.157877	1
EIF4A2	449980	384	25	117897	30225	305487	3	0	7	6	27	1474707	0.158052	1
LCE6A	NaN	NaN	NaN	22698	6201	0	2	0	0	50	752	26390559	0.158198	1
CD47	288227	650	5	93912	24960	185328	4	1	4	3	9	502164	0.158416	1
ADD2	659649	592	24	228735	59553	324792	13	7	9	9	51	1420185	0.158501	1
SPINK13	72574	418	-9	28860	6357	112086	2	0	2	20	101	3950349	0.158609	1
MORN4	564805	169	40	42042	11427	110682	3	0	0	0	0	122109	0.158735	1
C11orf86	NaN	NaN	NaN	31473	9945	0	2	1	0	6	103	2278497	0.158747	1
CCDC102B	70753	1048	-8	148239	35451	184392	9	2	5	4	25	720447	0.158815	1
NIT2	378824	361	26	80457	21216	224757	3	1	4	6	38	2213172	0.15883	1
OR8B3	149616	857	0	85371	24609	4914	3	1	1	5	52	1292694	0.158902	1
ZNF439	739660	633	-2	142311	34125	81081	7	1	3	4	23	777426	0.158974	1
HN1L	1591571	320	37	53742	15405	110331	2	2	1	47	257	10205169	0.158993	1
CDRT15	96214	975	-61	50661	16380	32292	3	2	3	5	69	972621	0.159202	1
CDK5R1	636808	587	14	82017	26091	11700	1	0	0	46	225	11154000	0.159318	1
APPL2	233879	387	30	192972	49803	432666	5	0	6	9	35	2836860	0.159805	1
KRTAP19-6	22916	1048	-79	16146	4797	26793	2	0	1	5	13	231621	0.160079	1
LAMA2	67993	771	-6	888264	237861	1739439	26	12	34	1	53	2249871	0.160209	1
TMEM165	235221	348	8	88569	27846	100386	1	0	1	50	168	10874994	0.160388	1
PPEF2	482292	429	45	215592	56550	442143	9	4	10	9	77	2808663	0.160571	1
LY75	325669	405	36	500955	119964	795600	7	4	6	6	17	1641939	0.16079	1
SLC35A4	706371	319	29	82563	31512	146133	2	0	1	11	28	3019770	0.160798	1
CCL20	161901	296	7	28665	7020	126477	1	0	1	13	44	2610153	0.160857	1
C1orf131	383866	603	14	84084	22386	199017	4	0	5	9	28	1934868	0.160936	1
WDR27	197890	593	-17	242658	69732	285246	9	2	6	1	10	674076	0.161743	1
VSTM5	NaN	NaN	NaN	56043	15912	0	1	0	0	50	752	26400270	0.161791	1
HMG20A	341694	645	30	100893	25467	155610	5	0	3	6	37	2220192	0.161859	1
TRIM7	1034999	415	35	149409	47385	134901	2	0	3	17	59	3853434	0.162096	1
CHST15	149497	632	19	158730	41340	140049	3	2	1	15	61	3872271	0.162108	1
ZSCAN1	1187584	694	-42	110799	34164	244998	9	4	4	2	23	615108	0.162351	1
PKNOX2	412479	731	16	134160	36543	214461	4	1	3	5	27	1513785	0.162429	1
PKD1L1	239031	377	12	797238	229320	1208142	30	22	20	6	44	1867749	0.162526	1
OR10H5	808269	590	18	83967	26832	13923	3	2	1	13	95	1833000	0.162784	1
PDK4	195488	393	-3	117858	31434	253656	6	1	9	1	10	338325	0.163151	1
DPH3P1	NaN	NaN	NaN	22230	5499	16380	2	0	1	8	116	3102723	0.163682	1
GRIK4	298412	678	31	267813	76518	430560	9	1	8	7	41	2273466	0.163797	1
DZIP3	172270	941	0	353964	85371	676026	17	5	17	1	31	1039506	0.163864	1
EPHA3	27204	NaN	-18	280722	74958	399672	31	6	21	2	31	633087	0.164032	1
ZNF761	361546	876	-58	212979	50739	209430	5	0	0	2	6	746343	0.164224	1
S100A9	1140044	401	32	33228	8073	30654	2	0	2	5	13	684606	0.164363	1
ATF6	407279	420	16	190164	52611	366327	5	1	3	0	4	418938	0.164747	1
AADACL4	145424	454	23	111579	33033	110448	5	1	1	24	95	5288400	0.164938	1
SLC44A5	178229	935	-21	220272	55965	522873	9	0	17	0	17	578838	0.165023	1
PPP1R21	168167	780	24	226395	58032	473382	3	0	6	2	12	1164579	0.165783	1
PVRIG	1465817	204	59	86541	30108	44577	5	2	0	2	6	257634	0.165817	1
TMC3	245396	787	28	311571	84708	311337	12	1	12	9	53	2488824	0.165929	1
LBR	660503	319	0	174993	47307	288054	6	1	6	24	118	6959706	0.166318	1
UGT1A10	NaN	NaN	NaN	147576	40911	689715	4	0	2	0	2	730626	0.166619	1
LRSAM1	784133	209	45	210093	55263	526266	5	2	5	3	10	900393	0.167187	1
KIAA1407	438696	487	29	270348	66027	439452	5	2	7	18	90	5706753	0.167552	1
KDM4C	153801	838	14	326001	82446	633087	5	2	3	0	5	715533	0.167557	1
BMPR1B	119865	642	-15	143676	37557	213759	8	1	8	2	15	597051	0.167679	1
TMEM205	1385739	197	31	52533	15795	75582	1	1	1	50	353	13092612	0.167753	1
KRT33B	1321356	424	-6	112983	32214	140985	5	0	6	29	174	5056818	0.167774	1
CAMK1G	204559	405	-3	136695	36348	294489	4	1	7	3	11	557817	0.167806	1
FAM71B	166999	1198	18	164307	49101	66105	8	4	2	6	19	689130	0.167963	1
FBXL2	496632	352	15	122187	33657	312741	4	0	6	26	160	10279503	0.167999	1
CCL15	779228	525	19	32877	8541	68094	2	0	0	3	11	360750	0.168005	1
PGLS	961640	206	42	69225	23790	65637	2	0	0	3	20	894036	0.168116	1
TSPAN5	217859	797	12	78000	19695	203346	2	1	1	3	4	484887	0.168204	1
ASCL2	NaN	NaN	NaN	49179	19383	0	1	0	0	50	752	26403741	0.168347	1
TRPC1	414031	437	20	215943	55965	211887	9	2	7	6	41	2223702	0.168461	1
LMLN	607598	410	30	198120	52845	382707	5	3	5	6	32	1845090	0.168502	1
OR2A7	209930	767	-5	82758	26286	11349	1	0	0	50	295	15424344	0.168555	1
TMPRSS7	265735	336	21	204555	54483	315549	6	5	5	20	130	5840835	0.168587	1
IZUMO4	1853815	239	37	69264	16965	164619	3	1	2	8	46	2130531	0.168588	1
IFIT5	253827	213	17	134511	35490	36036	2	1	1	47	167	8186958	0.168603	1
KBTBD2	373657	264	15	173199	46761	54405	4	0	1	40	155	10350249	0.168612	1
SPHKAP	93607	615	-9	471159	131274	282789	40	18	7	4	56	1184274	0.168688	1
BTBD8	220071	406	-6	109863	27144	308763	2	0	6	8	39	2219217	0.16872	1
FBN1	399245	304	-1	835263	202761	1533753	29	7	37	7	73	3038997	0.168789	1
SOD2	643775	604	19	63960	16653	80379	1	0	1	8	21	1345578	0.168797	1
NECAB3	710350	161	55	112164	32331	193635	4	0	7	3	15	536367	0.168998	1
MEOX2	25585	1039	-17	84435	23556	75465	7	1	6	8	97	1662258	0.169142	1
SLC22A10	1307417	572	17	149604	44850	222768	9	4	3	24	103	4287543	0.169288	1
CGB	2070141	200	35	44304	15132	41535	1	0	1	12	37	1558011	0.169426	1
GORASP2	414976	406	36	123747	39468	199836	2	0	2	13	57	4736277	0.169475	1
EIF1B	195546	675	10	33228	8190	97461	1	0	1	41	198	11218545	0.169489	1
SLC41A2	759566	294	30	160953	44733	211770	4	1	4	11	73	3850821	0.169496	1
LIX1	382123	614	38	80223	21450	138762	3	0	3	11	36	3512652	0.169552	1
ABCF2	610106	290	32	181857	48282	369018	3	3	3	5	23	1839396	0.169607	1
C4orf45	155458	337	10	54522	13221	195975	2	0	2	3	7	869622	0.16964	1
C1QB	389456	541	29	68640	21450	40482	4	1	0	11	59	2705391	0.169749	1
BANK1	80568	482	-7	227682	55692	324909	9	3	4	2	17	768378	0.169773	1
ZAR1L	NaN	NaN	NaN	89388	25272	0	9	2	0	6	104	2293824	0.169821	1
FER	140251	741	20	240552	56979	633204	5	0	5	7	37	3597165	0.170114	1
MET	558228	262	2	395850	108069	460980	8	1	4	8	57	3748407	0.170245	1
ERI3	758083	308	29	95706	26676	223470	4	3	3	27	124	6655584	0.170265	1
MUC4	920866	365	49	331149	92742	428337	90	32	26	0	58	521079	0.170382	1
BPIFB6	515931	491	46	128739	37050	391248	5	3	12	9	94	3052179	0.170402	1
WNT3A	688142	391	0	97617	27924	81666	2	2	1	32	186	7646496	0.170458	1
SEC31A	775541	268	38	345501	95472	612261	8	2	5	0	7	707733	0.170632	1
NPSR1	106021	949	0	115674	31629	466011	3	1	9	10	67	3714360	0.170652	1
ACCSL	389604	680	1	162591	43680	348426	5	2	11	11	63	2187861	0.170829	1
C2orf74	NaN	NaN	NaN	55458	14391	0	1	0	0	50	752	26398749	0.171083	1
ZNF566	645107	833	-56	121953	27339	112671	5	0	1	16	52	2151045	0.171202	1
DDO	248863	469	20	101361	30615	105066	3	2	3	7	45	1721187	0.171241	1
FAM101A	1197100	504	34	37323	11349	11466	1	0	1	50	689	15658227	0.171317	1
BAIAP2L1	609918	249	36	146796	39000	426933	3	1	5	5	25	1799577	0.171505	1
LIMCH1	319991	391	31	313794	82134	550836	8	4	10	8	48	2558829	0.171586	1
KLHL41	370890	418	22	169104	46527	130455	3	0	0	8	28	2415387	0.171698	1
MFSD1	181588	972	2	147888	40131	388323	4	0	2	1	3	469287	0.171809	1
CCL17	749108	159	39	27027	7722	57213	1	0	0	9	18	2425839	0.17195	1
SGK494	1651143	225	31	116766	32877	313326	2	0	0	1	2	658671	0.171997	1
TGFBI	337362	298	32	190788	56784	273195	5	0	5	6	43	2583204	0.172043	1
RNASE12	637784	493	22	41925	10491	26910	2	1	0	48	226	9838842	0.172074	1
SAMD9	362550	625	8	445146	113412	25623	12	0	0	4	19	1337583	0.172569	1
ADH1A	250334	786	3	106158	29796	236925	4	2	0	5	15	1452048	0.17279	1
PPIP5K2	204934	549	16	351312	91299	519129	8	0	8	6	35	2123472	0.172815	1
SAFB	879991	295	21	261690	69420	379899	9	2	9	10	39	2553057	0.172879	1
HHEX	359162	317	17	74568	22191	62361	2	1	2	4	52	2087007	0.173	1
SCRN3	385177	419	24	121758	30693	146484	4	0	1	2	9	597168	0.173115	1
TMEM151A	2133752	236	53	122577	42510	18837	9	2	0	44	375	12825969	0.173134	1
PSTK	274189	673	11	99021	26169	88803	2	1	0	50	240	12361908	0.173196	1
JTB	2028800	222	34	42198	11271	131508	2	0	2	4	26	1356264	0.173533	1
SERPINI2	135686	933	-18	117663	28587	143793	9	2	5	2	16	531297	0.173608	1
MAGEB10	10745	NaN	16	95394	27222	25389	6	0	2	30	201	5902104	0.173633	1
PTCH1	186893	510	53	419094	123786	505557	8	2	7	10	37	2804178	0.173633	1
RPRD1A	370331	430	22	89154	23751	98280	3	0	2	21	96	7554261	0.173946	1
ARHGAP17	272834	185	22	247533	71175	444717	10	3	5	2	22	1440855	0.174119	1
FAM229B	145073	296	-5	22854	6513	68445	1	0	1	26	130	7746297	0.174192	1
TMEM252	127057	578	-20	46488	14235	37323	3	1	0	44	391	13292136	0.174454	1
TMEM132D	32086	969	-33	302796	87048	186030	32	12	15	2	60	622986	0.174524	1
SMYD4	1458897	153	26	224016	63219	209313	4	2	4	19	70	3877731	0.174869	1
RAD51B	446885	404	37	112476	31785	470223	6	0	4	2	12	1045824	0.174955	1
MTTP	318764	787	11	253032	69420	422955	10	5	6	8	46	2398773	0.17501	1
SEC22A	338654	421	48	87360	23556	136890	1	1	1	6	28	2184195	0.175056	1
PDC	278089	492	-7	71058	17043	66924	3	2	0	23	128	7589205	0.175129	1
EFHA2	191406	621	-37	151905	41028	248859	9	0	9	6	68	2187198	0.175198	1
LONRF2	94009	703	5	207792	62361	248742	10	3	6	1	14	620685	0.175265	1
WNK1	467405	289	45	777855	246948	697320	19	2	7	9	40	3182244	0.175278	1
CLUAP1	805495	246	39	121641	28821	250146	5	0	2	1	4	369954	0.175517	1
BCAR3	595695	173	9	229398	65676	254592	5	3	0	9	39	4177485	0.175578	1
LAMA3	317706	216	60	961506	264069	1727388	16	10	24	17	89	7470489	0.17582	1
SEMA3E	74057	955	-30	222885	56979	380952	14	5	18	4	45	958269	0.175893	1
WNT4	434362	307	28	96915	28509	81900	3	1	1	50	242	13177359	0.176045	1
AFP	331900	594	3	176748	44148	270153	5	1	4	10	43	2944188	0.176048	1
PTGIS	1117465	380	52	139230	41067	211068	8	6	3	2	23	552240	0.176176	1
PTGFR	249935	671	-16	107016	29055	56628	10	2	2	6	39	804960	0.176301	1
TTLL1	627533	202	46	121485	31551	259623	3	1	3	1	6	763191	0.176467	1
TMEM174	447937	584	21	66261	20085	53469	5	1	1	11	65	2306460	0.176679	1
PLCL1	627125	907	10	305019	82017	113841	10	4	2	3	16	957450	0.176744	1
BTN1A1	426020	498	34	145080	42939	204750	7	3	0	7	21	1437969	0.176803	1
NAT6	843769	206	51	80067	29094	83772	4	0	0	8	20	1558089	0.177369	1
LY6G6F	2517236	193	20	82290	24882	104247	1	1	3	17	48	3250728	0.177738	1
PTPLA	488883	383	4	81510	22971	123435	1	0	2	19	119	7271160	0.178072	1
LDB2	55867	983	2	117234	30303	210951	6	2	7	7	39	1176279	0.178238	1
ANK1	574508	533	36	568542	167856	986193	15	7	28	9	81	3067857	0.178426	1
MARCH3	298349	603	27	69810	21216	62712	1	0	1	21	122	5615805	0.178575	1
RORB	95756	913	-21	132717	32955	228852	8	1	12	6	88	2215083	0.179132	1
R3HCC1	NaN	NaN	NaN	70200	20826	0	4	1	0	8	116	3101670	0.179164	1
DHRS1	915114	220	38	87399	26559	288171	1	0	2	5	7	1142583	0.179191	1
SMC4	435184	513	16	372879	90324	471159	5	0	5	3	6	815802	0.179301	1
GOSR1	488195	329	28	73905	18642	243828	2	0	2	5	44	3088683	0.17945	1
UBE2Q2	560951	339	55	123123	30147	261612	4	1	4	5	7	656370	0.179474	1
DMRT1	85434	622	8	102921	30225	115479	4	1	2	40	203	9230364	0.180023	1
LXN	196969	940	-12	65013	15600	135603	2	0	0	1	4	786591	0.180097	1
SP6	1071489	214	29	100386	32409	0	5	1	0	12	64	2464995	0.180113	1
C11orf88	401074	326	18	57525	14430	171288	2	0	1	4	20	1908582	0.180215	1
RORC	1014595	212	33	146835	41067	285012	4	2	7	7	25	940134	0.180563	1
MCOLN3	425053	623	4	161031	39039	225576	11	1	3	0	4	264615	0.180623	1
OLFM3	66875	991	-15	129636	33813	189423	6	0	9	6	61	1219023	0.180695	1
DCT	123751	906	0	156156	42159	184041	6	3	3	23	81	3991104	0.180697	1
QRFP	727815	241	22	35880	12090	11349	2	1	0	5	22	1104090	0.181248	1
TPTE2	288628	778	-16	154947	37986	464256	8	5	13	6	43	1436292	0.181249	1
FAM150A	105913	682	-11	36582	10920	49725	1	0	3	5	44	1329861	0.181272	1
METTL11B	NaN	NaN	NaN	80847	20709	0	5	2	0	6	104	2289261	0.181669	1
FAM131C	876105	197	40	79131	22308	44577	7	0	3	8	43	1448811	0.181673	1
WIBG	1994705	229	35	59904	17433	57213	1	0	1	5	27	1430910	0.181886	1
AZGP1	1584669	391	36	84240	22347	131391	4	0	3	8	30	1890486	0.181891	1
GCLM	558028	275	9	78234	21099	118638	1	1	1	3	23	1593384	0.182149	1
INSL3	1216364	212	37	34983	12051	12285	3	0	0	50	328	10239333	0.182171	1
ASB9	204248	NaN	17	86502	23478	156429	4	1	3	17	118	6289686	0.182652	1
PARK7	387339	207	26	53859	15639	123903	2	0	1	7	25	2059863	0.182654	1
AGPHD1	506023	375	39	105924	27807	71838	4	0	3	2	18	1291563	0.182968	1
KMO	171933	382	-17	142116	35607	406341	5	2	8	16	58	3524547	0.182989	1
ITM2A	13949	NaN	29	74412	20592	63531	2	0	3	17	159	5232474	0.183056	1
LCP1	400791	682	47	180414	47034	381420	6	2	9	6	29	1668849	0.183153	1
MRGPRX4	631291	436	20	85527	28080	28197	3	1	0	20	72	4309734	0.183342	1
ZMYND12	571804	519	24	106197	25545	238212	3	1	3	5	9	712257	0.183579	1
VTA1	169555	426	-15	88530	23088	144495	3	0	2	7	25	2051946	0.183581	1
HSD11B1	219540	222	15	83499	22386	152919	5	4	1	15	52	1959438	0.183659	1
ZNF28	557083	1008	-39	188877	45357	228618	6	1	0	6	12	1277679	0.183778	1
GJB7	222729	596	22	62595	16497	103077	2	2	0	23	115	6474234	0.183889	1
AGGF1	261159	333	30	205413	51636	286182	6	1	2	5	16	1566045	0.18396	1
CSTL1	188567	750	-16	41808	10608	58149	3	0	3	9	46	1197924	0.184149	1
PTCRA	1086050	203	41	73944	26676	71370	4	2	2	10	39	1555788	0.184254	1
IRAK1BP1	198307	832	-13	72228	20787	69966	2	0	0	4	9	1294371	0.184286	1
ZNF622	203311	624	-20	135915	34203	171756	3	1	2	6	46	2629731	0.184594	1
RANBP17	214548	691	12	313482	81627	866385	15	8	20	3	30	1328769	0.184755	1
SEMA4F	964055	364	41	208806	67899	323622	7	1	10	21	151	6468891	0.184796	1
CMA1	898202	411	17	68718	20670	118170	4	1	3	9	81	3293823	0.185088	1
FBXW12	1401411	263	32	137241	35217	242307	4	0	2	2	3	457704	0.185412	1
SPATA18	137116	878	9	153543	41262	308997	5	2	4	4	19	1365975	0.185472	1
NXPE4	109030	716	-17	152841	40794	194922	7	1	6	8	90	3215160	0.185589	1
LAMB3	211663	300	4	327678	94341	463437	10	1	5	4	11	1482390	0.185808	1
GLT8D2	1193959	281	37	101361	25701	303264	4	0	4	1	14	1318668	0.18582	1
EPB41L2	122847	707	17	285675	76323	445770	12	1	16	7	57	1824537	0.185865	1
KCNK1	135142	419	12	91689	27534	105768	4	0	1	1	4	476034	0.185881	1
POU5F1	3364017	401	19	98163	30654	74178	2	0	3	50	225	7607769	0.186007	1
FAM127C	304745	NaN	42	30966	9282	16848	2	1	0	38	200	6902727	0.186245	1
KRT33A	1321356	424	-6	112593	32604	121095	4	2	4	29	174	5056818	0.186847	1
ITLN2	777836	441	19	93756	24180	186498	4	0	2	7	27	1957098	0.187055	1
HPD	829168	195	44	115323	29640	277173	3	0	10	7	51	1385202	0.187065	1
CNOT6L	152352	493	18	159159	41379	202293	2	1	2	22	96	6744231	0.187322	1
AASDHPPT	86519	753	-16	88452	22698	120861	4	0	1	4	6	592137	0.187412	1
LDHB	502803	826	-13	95433	25428	178191	4	0	0	1	6	650403	0.187458	1
FAM161A	758678	249	34	186966	47619	166959	2	1	2	3	24	1456533	0.187884	1
PAGE1	355308	NaN	14	43251	10920	71955	3	0	0	4	12	765921	0.187895	1
LHX1	625114	462	21	112476	32487	40365	2	0	1	30	160	7369986	0.187936	1
CCNB1IP1	393743	401	-18	78390	20592	85761	2	0	0	29	108	7364604	0.18806	1
PHOX2B	308280	376	22	84006	27495	49023	3	0	0	2	8	1203267	0.188083	1
CKAP4	168486	445	23	162669	49686	34983	3	0	2	27	124	7195812	0.188154	1
PBX2	2119974	392	28	119964	35061	226395	3	0	1	6	11	2171169	0.188178	1
SAMD10	1152034	208	48	55926	17199	65052	2	0	0	3	10	1083810	0.18818	1
TAS2R16	54952	972	-23	80340	22620	16029	4	0	3	4	59	1357863	0.188335	1
PF4V1	233432	444	6	29250	8775	33930	1	0	1	15	72	3899337	0.188365	1
TNFSF18	251425	492	0	56667	14586	66222	1	0	3	2	9	737451	0.188441	1
OXNAD1	188483	517	34	88569	24570	190242	3	1	3	3	13	1035879	0.188497	1
INO80E	NaN	NaN	NaN	67782	21489	137826	3	1	2	2	18	682539	0.188802	1
FOXJ3	541904	579	23	178386	45903	254592	5	0	0	2	3	663975	0.188843	1
VAT1L	44717	1259	-28	118833	32565	257751	9	2	6	1	9	348153	0.188879	1
ZNF665	392290	946	-49	191919	47814	90675	11	0	1	3	14	689442	0.188977	1
CDH20	45961	896	-6	224133	62283	301509	8	3	5	1	15	636363	0.189281	1
MAPKAPK2	477806	261	32	119067	32448	330057	3	0	1	5	21	2072382	0.189792	1
OR4D2	851306	401	14	81822	26169	18720	6	1	1	30	199	5909943	0.189822	1
USP44	442533	328	13	199524	53079	107757	5	1	2	14	48	3711201	0.190044	1
ELMSAN1	535648	191	50	283257	88569	197730	11	5	2	13	70	2859519	0.190497	1
MLH3	897430	222	50	409578	106392	295542	8	3	1	10	31	2202252	0.190517	1
GALNT7	249234	381	15	188019	48321	263133	4	0	2	3	9	944853	0.190663	1
IVNS1ABP	325191	535	-10	185172	46605	274365	5	0	3	8	16	1715805	0.190668	1
EHD4	830035	224	39	150579	42237	95589	5	0	0	1	2	353301	0.191004	1
ATR	564756	403	24	753090	196833	1006317	14	0	13	0	13	1203150	0.1911	1
OPCML	9310	1074	-19	102336	29523	175149	13	5	19	1	30	261456	0.191196	1
RAB10	591333	135	44	58539	14352	138879	2	2	0	48	203	12470367	0.191203	1
FBLN5	333910	440	29	128895	33384	252603	4	2	5	6	29	1687452	0.191281	1
KIAA1217	136799	839	-15	539019	152685	625716	19	4	4	4	20	1426269	0.191281	1
AKAP11	183147	411	51	531297	141453	227448	9	0	0	2	0	576225	0.191621	1
CTDSPL	408788	457	22	79404	21333	151515	2	0	1	10	63	6446427	0.19166	1
ZNF770	432995	382	2	194805	48555	12753	3	2	0	38	179	9178260	0.191782	1
GLOD4	662733	483	10	86814	22347	230841	2	1	2	4	17	1663233	0.191793	1
WDTC1	854040	162	27	191880	52767	313911	6	0	10	8	47	2252484	0.191805	1
PTH2R	221399	671	0	157287	41730	323739	5	0	8	10	53	2202291	0.192114	1
FRY	221552	488	40	852969	233025	1479816	28	5	40	0	45	1712841	0.192368	1
HMOX2	751633	160	39	90012	23595	106470	1	0	0	8	16	1506648	0.192617	1
KRAS	259193	512	16	66846	16107	104130	2	0	0	1	1	293358	0.19281	1
FABP9	191177	595	1	39000	8970	95004	2	1	2	8	74	2333994	0.192817	1
CDC42	441481	155	28	62712	17784	128349	2	0	1	14	57	4798170	0.192826	1
BRMS1L	188271	400	10	96408	21528	220896	3	0	5	15	73	3993288	0.192899	1
HIST1H2AK	228884	634	40	34281	11934	43173	1	1	0	44	149	9331218	0.193087	1
CTLA4	148748	632	18	63765	16263	82368	4	3	1	6	20	1034943	0.193247	1
TPRG1L	250027	288	16	75153	22776	68094	1	0	2	47	224	10631712	0.193287	1
CHAT	NaN	NaN	NaN	212901	62166	341523	10	1	10	2	26	926913	0.193477	1
GNPTAB	345225	190	14	358488	92079	485550	5	0	2	3	5	1033578	0.1937	1
LEMD1	662921	249	41	31356	8307	103077	2	0	1	31	182	9317685	0.193955	1
HOXA2	356045	385	28	102492	30303	43407	2	1	0	20	113	5626335	0.194186	1
SGPP2	283423	596	13	107874	34281	203112	3	0	0	1	1	406731	0.194221	1
PEX26	516479	239	27	83382	26364	116766	5	1	3	12	78	2738775	0.194526	1
MED13	369807	275	3	608829	168402	595296	12	1	3	2	14	2119416	0.194673	1
PTPN20B	157964	642	23	250458	56082	1842516	1	0	0	0	0	1898598	0.194909	1
IFIT2	253000	263	27	132522	33969	58617	2	1	0	9	36	2741154	0.194998	1
RAMP3	1003768	291	50	41340	12129	52299	6	0	0	1	5	169923	0.195232	1
TUSC5	1447271	228	21	47892	15522	83070	6	0	4	4	21	448071	0.19525	1
DKK1	94567	519	-8	73827	21294	73359	4	0	3	3	16	837213	0.195409	1
RAPGEF6	314836	627	30	502008	129324	562536	7	3	8	8	53	3144414	0.19543	1
TCEANC2	446494	225	28	59124	16107	124137	2	0	1	10	46	2441595	0.195431	1
CYB5R4	87867	870	-12	152880	37362	309114	4	0	5	3	12	847548	0.195828	1
ZNF280A	201933	683	23	150423	40638	28899	6	3	0	8	40	1927419	0.196062	1
RHOBTB1	99491	403	-13	196287	52572	198432	8	5	1	24	156	7493928	0.196099	1
CST8	188567	750	-16	40404	10725	81198	3	0	2	2	7	228111	0.196257	1
MCM9	116680	856	16	110799	29601	125190	4	0	3	13	50	2878746	0.196398	1
TRPM3	135903	707	-9	492921	131976	709605	24	14	23	1	37	913146	0.196412	1
IQCH	275948	360	31	304863	80301	499239	7	3	6	6	29	1878045	0.19652	1
CLLU1	NaN	NaN	NaN	34281	8541	85527	2	0	0	2	15	617292	0.196722	1
NPVF	254553	444	32	56121	14196	83421	2	1	1	47	296	14891370	0.196731	1
CLEC4G	688482	384	31	83772	23400	104598	3	0	4	8	50	1600560	0.196887	1
RTF1	820644	237	37	205725	52026	324090	6	0	11	21	101	4639401	0.197186	1
FRMPD2	112127	451	35	368745	104169	582543	9	4	12	6	26	1903824	0.197248	1
MPP1	1741051	NaN	3	135681	35022	240786	3	1	1	1	18	1234545	0.197448	1
C6orf10	1754032	479	27	138918	34710	756054	3	0	7	2	12	1004991	0.197534	1
NUP210L	2028800	184	37	530868	150657	1138527	17	5	24	3	36	1692093	0.19781	1
TPO	56524	599	-23	257400	77805	308178	24	7	13	1	23	542334	0.197899	1
MED28	271066	989	32	50232	14235	75465	1	0	1	49	173	14195454	0.197926	1
GSTM2	927739	201	22	66612	15522	246285	1	0	8	13	74	3127722	0.197984	1
AMPH	167080	639	7	198471	55419	515268	19	7	32	0	39	570687	0.198103	1
FAM26E	261450	479	19	85683	23829	60489	4	3	0	14	87	3531177	0.198225	1
PNLIP	128161	704	-16	134004	35178	273429	12	2	12	2	22	722943	0.198263	1
METTL20	313930	228	11	73398	19851	69615	2	0	1	50	230	13891956	0.198357	1
SDR9C7	2103486	286	26	85878	25740	107640	5	1	4	22	199	6926712	0.198397	1
CTTNBP2	96915	674	-11	463242	131352	519363	24	1	18	2	29	956982	0.198501	1
PCYT2	3798594	211	19	117273	32019	232713	4	1	8	15	71	2327559	0.198556	1
PLEKHH2	503591	421	29	426036	111930	691470	8	6	10	1	30	1792011	0.198694	1
GNPDA1	696239	321	48	83655	20943	126360	2	0	0	6	13	1689870	0.198873	1
RASGEF1B	9755	972	9	139113	33345	319644	3	0	0	0	0	352989	0.198907	1
TEKT5	235538	242	-1	136461	37401	181233	6	1	6	4	22	1071720	0.198988	1
PIWIL4	367057	478	6	244218	64077	436644	5	0	4	1	9	1043757	0.198994	1
FRMD5	929260	504	33	162435	44070	525447	5	1	6	13	32	2339259	0.198997	1
GRIA3	226353	NaN	-6	264849	70239	388089	9	3	5	10	75	4730739	0.199067	1
GSX2	77093	472	20	81315	26442	12987	3	0	1	7	24	1030614	0.199074	1
SRSF1	854628	182	27	72696	22191	87516	2	1	0	15	46	3193515	0.199191	1
SPG7	1107401	203	39	235014	69420	381420	7	2	5	3	13	587028	0.199212	1
HIRA	611613	300	1	285714	82836	510003	6	3	4	8	49	2944812	0.199229	1
E2F4	1109491	150	46	115947	33813	191529	4	0	5	2	17	786552	0.19939	1
RNASEH2B	137500	621	34	95979	22659	198666	2	0	2	14	35	3674268	0.199641	1
EIF4E2	286805	211	36	71916	17472	98280	3	1	2	18	62	2923986	0.199656	1
RETSAT	975949	211	18	168441	50700	295659	4	3	5	9	25	1881165	0.199661	1
C5orf28	497364	369	1	59397	17355	44460	1	1	2	11	106	3807843	0.199706	1
TMOD3	511166	132	27	102375	25740	411606	2	1	3	36	103	9662289	0.199833	1
GPBP1L1	913416	157	28	134940	36465	315198	6	2	2	15	64	3732027	0.200106	1
TFAP2A	199695	375	6	126789	37245	210015	4	1	4	7	41	1617486	0.200162	1
CRNN	387153	671	6	136188	38844	63531	7	1	0	3	7	543621	0.200271	1
GMNN	422850	362	40	61074	15444	108108	1	0	1	3	18	1029483	0.200336	1
LY96	250079	468	26	47658	11193	103311	1	0	2	50	215	12816024	0.200338	1
RPL23	1255539	159	41	40404	11427	174213	2	0	2	8	57	2601963	0.200416	1
LPXN	237619	644	-4	114075	29016	207675	5	0	2	3	5	635700	0.200419	1
TTC27	358024	636	17	242151	62985	404937	4	4	3	4	25	1783860	0.200455	1
ESF1	123437	617	-10	250458	54678	314262	6	0	0	0	0	368940	0.200464	1
CREBZF	325720	554	-19	93093	31512	20241	2	0	1	50	398	15939339	0.200516	1
CEP57L1	390388	492	33	135408	31083	197028	2	3	0	4	17	1287936	0.200821	1
CAMTA2	1416161	231	30	346632	104637	557739	9	4	7	7	36	2472327	0.20088	1
EPB49	584373	219	34	117195	32682	253773	7	2	14	4	37	898443	0.201038	1
PACS1	2403161	236	49	271362	77766	535626	11	3	14	2	19	912405	0.201062	1
XAGE3	476232	NaN	26	32955	8463	93249	2	0	3	2	6	299754	0.201182	1
FAM24B	290558	619	14	26793	7488	84942	1	1	0	22	97	7336758	0.201216	1
KRTAP13-2	4608	1035	-69	47268	14742	30420	6	2	1	32	174	3477513	0.201318	1
SLC5A1	451895	458	-26	186732	53235	354861	8	3	9	4	40	1344993	0.201457	1
APOH	135537	178	-23	99372	25701	192231	4	0	3	3	6	432276	0.201522	1
MAN2B2	501896	278	33	278850	84318	334971	10	2	5	18	77	4686357	0.20181	1
PAPOLG	370439	436	18	211692	56823	478881	4	0	1	2	7	1270620	0.20188	1
ENAM	262250	609	16	319254	85683	244998	15	2	7	1	10	503802	0.20189	1
FGL1	399891	253	-16	92235	20904	149292	3	1	1	13	62	3405948	0.201908	1
BEND6	428244	271	23	81198	19890	253890	4	2	3	2	11	452322	0.20202	1
SMEK1	340189	467	40	234546	60645	275652	6	1	2	12	50	3761550	0.202071	1
FOLH1B	116674	1062	-16	128466	32643	354393	10	2	19	0	21	387036	0.202343	1
PPP2R2D	123624	470	-21	121017	29679	126945	3	0	2	16	96	4801173	0.202744	1
ATG7	184628	425	30	201006	54522	449631	4	2	4	2	14	1298505	0.20299	1
NOL4	10823	966	-14	181233	47736	227916	11	2	6	0	8	275652	0.203286	1
PKHD1L1	134643	732	6	1198782	326898	1097694	74	22	67	0	89	1424592	0.203292	1
ALDH3B2	1408104	424	60	108381	30849	221949	7	2	10	5	63	1257477	0.203529	1
IL10RA	581910	576	49	158925	47346	129753	6	1	2	14	51	3108261	0.203579	1
CTSL1	122983	577	26	96954	23556	157716	3	0	0	2	6	967473	0.20361	1
CAP2	249798	454	-8	136929	36348	403767	5	0	6	5	21	1612728	0.203762	1
LEPROTL1	387693	231	51	57720	17277	125424	1	0	0	5	7	636480	0.204121	1
OR2T12	18846	936	-35	86112	26442	18837	11	2	1	8	58	754494	0.204165	1
LMO7	197158	342	46	489411	124371	631800	15	4	11	7	41	2134821	0.204213	1
HSPA4	637803	223	39	243126	60489	374517	4	0	1	3	2	662103	0.20429	1
DPYSL5	1261383	378	36	157677	46254	280332	5	5	5	8	66	2643225	0.204426	1
CYP4A11	492091	578	5	146952	40950	288639	4	1	9	11	71	3213444	0.204479	1
DEFB129	1010597	348	24	51324	13962	56745	2	0	2	2	7	354510	0.204599	1
LIM2	368509	610	-9	60177	17511	73242	3	2	2	9	38	999648	0.204941	1
DNAJB5	676166	394	23	115245	33930	58500	3	0	1	44	233	14904825	0.205166	1
GPR123	296872	499	-10	150306	48945	131976	8	2	3	4	13	779415	0.205525	1
DNAJC13	210456	538	14	646854	166530	1202058	10	1	8	3	18	2147457	0.205562	1
ZNF438	89942	603	20	229242	64662	76752	11	4	0	6	28	1049178	0.205815	1
LRRFIP2	392784	376	27	212667	53391	687726	3	1	7	14	78	4925115	0.205861	1
RERG	354506	469	3	56199	15405	106938	2	2	4	2	26	799344	0.205953	1
GPN3	943393	206	47	102687	24375	225225	1	0	1	2	7	1201356	0.206001	1
YIPF5	39627	428	1	73515	19383	122031	2	2	1	5	25	1001247	0.206122	1
PRKAA2	39631	514	-5	156429	41652	222651	8	1	4	3	33	1333839	0.206146	1
SH3BGR	294735	503	5	69537	17745	169299	5	1	1	1	2	273078	0.206236	1
TYW3	104029	1055	-14	75894	18174	111384	3	2	2	2	33	1035177	0.206295	1
PAK2	798731	446	41	151242	39585	348075	6	1	1	0	2	387660	0.206499	1
METTL25	54295	1263	-20	172029	45357	273897	6	1	4	11	39	1848834	0.206613	1
OTX2	191584	1012	-7	81510	24024	62946	5	2	2	4	21	855972	0.206678	1
PDZD2	440207	557	6	769665	237939	874341	15	7	10	0	17	1112280	0.207001	1
PPIL3	635570	201	31	58305	14235	155376	2	1	1	4	12	911313	0.207055	1
SH2D3A	736129	272	27	154167	52572	98865	3	3	1	8	63	2270658	0.207069	1
DLGAP1	368461	215	24	275535	78624	375102	11	12	2	5	27	1307046	0.207104	1
LAMB2	1898051	203	36	497601	148356	420264	14	7	10	4	54	2053428	0.207196	1
DCAF12L1	11311	NaN	-16	123162	40170	17433	15	4	3	4	66	918957	0.207204	1
STX7	180943	618	12	77259	18915	186381	2	1	3	8	19	1695837	0.207233	1
VSTM4	NaN	NaN	NaN	100542	29796	184392	5	1	5	21	188	6515925	0.207327	1
ACP5	1152381	272	31	88491	27573	62361	4	1	2	7	55	1350336	0.207535	1
XAGE5	476232	NaN	26	32409	7956	102492	2	0	1	4	13	777660	0.207631	1
SLFN13	763419	456	18	249054	68016	88920	10	0	0	1	1	264537	0.207659	1
COL4A3BP	253484	500	37	214539	58656	362817	3	0	3	5	14	1863030	0.207662	1
SCGB3A2	137041	470	2	26130	8034	78156	1	0	0	25	73	5290467	0.208043	1
HSCB	571394	219	-10	68523	16887	118287	2	1	2	8	39	2891772	0.208298	1
PTER	104989	791	-7	97344	27378	99684	2	1	0	8	117	5427786	0.208312	1
IPO9	764022	208	26	294840	81900	601614	11	1	14	0	15	683514	0.208338	1
TMTC4	123356	622	28	213993	61074	381654	3	1	6	10	37	2626455	0.208451	1
SLC2A4	1782958	316	21	137631	46059	173628	5	2	7	3	19	850707	0.208454	1
CDK19	322538	480	29	145314	37089	284076	5	0	2	5	16	1262079	0.208692	1
ZNF205	1626425	234	44	152997	45084	112788	6	2	2	12	44	2246595	0.208757	1
RALGPS2	364466	434	-2	171678	42198	630981	7	0	9	0	9	673179	0.208795	1
STK31	367849	441	14	297102	72150	632385	10	4	13	20	85	4612140	0.208952	1
CDK3	1639614	194	22	85761	24921	123552	2	1	0	3	19	924183	0.209624	1
IL21	126588	388	2	47658	11895	91962	3	1	0	33	164	7141563	0.209924	1
PPTC7	890955	144	38	84630	24765	133263	1	2	1	6	40	2568735	0.21003	1
TIRAP	385871	426	29	66105	20475	46917	2	1	0	21	108	7180134	0.210063	1
ITGA5	653663	190	42	294723	87633	559962	7	1	11	9	57	3404778	0.210263	1
MTA2	2695768	217	42	188760	54015	416754	3	4	5	11	62	3489018	0.210471	1
PACS2	892593	289	40	253110	71448	339534	12	1	9	4	38	1265472	0.210859	1
NTAN1	564013	463	22	89388	24219	227565	2	0	3	2	13	929721	0.210925	1
HIST1H4D	398813	636	53	27339	9399	18954	2	1	0	12	24	809016	0.210946	1
POC1B	236022	460	-6	136851	36426	408330	2	1	3	7	26	2246478	0.21096	1
PGLYRP3	836876	556	24	96174	27144	196677	4	0	4	4	20	877305	0.211327	1
GIT2	939215	254	46	221286	58578	546273	3	0	4	2	27	2581917	0.211452	1
ANKRD40	1585602	196	18	101517	29874	113724	4	0	1	1	22	895323	0.211531	1
ASPDH	762018	517	35	80535	26169	71253	2	1	4	5	29	766935	0.211617	1
NDUFS4	186422	619	5	50544	13338	102375	3	0	1	1	5	498849	0.211763	1
POP1	635159	368	44	286650	80145	377091	4	4	5	3	14	847782	0.21194	1
AOC3	1629499	190	23	205296	64272	182520	9	4	2	9	67	2738346	0.211963	1
TNP1	261601	642	23	16458	3900	59670	1	1	1	7	50	2367651	0.212097	1
TJP1	194015	515	-46	488631	137904	606528	12	6	8	4	31	1483599	0.212305	1
GLRX3	84315	854	-23	97500	25350	210717	2	1	1	2	6	618579	0.212339	1
BPIFA1	478384	482	27	70551	23400	207675	4	0	13	2	42	848679	0.212394	1
FYN	245639	317	21	167817	44889	286533	8	3	6	16	88	4082910	0.212524	1
GUCA2A	418399	579	24	32604	9282	31824	1	0	3	6	38	1033695	0.212593	1
TAS1R1	628180	259	38	236379	61737	122616	6	2	1	12	59	3984006	0.212632	1
CYP4F12	865205	605	21	149214	40794	289926	2	2	6	1	21	1054326	0.212661	1
OR6C74	411183	816	-1	84474	25272	11115	5	1	0	18	109	3234231	0.212787	1
AANAT	1202221	197	29	68484	21723	43290	3	2	2	8	93	1925196	0.21295	1
CABP5	993450	433	26	50583	12831	146952	3	1	4	3	40	1779843	0.213093	1
CCL24	1013258	255	46	33618	9204	56862	2	0	2	8	48	1948011	0.213194	1
CCDC164	751542	408	42	215319	52494	394875	11	3	16	7	107	2746848	0.213358	1
CLEC6A	321790	564	13	61893	14157	215865	4	2	5	11	78	2902809	0.213379	1
GCM1	414446	329	20	123123	32136	128466	5	0	5	10	68	3038724	0.214595	1
DCTN4	1015949	211	43	135057	35529	294021	2	0	5	3	18	1353534	0.214674	1
SRPRB	513771	523	23	76089	22191	174915	2	1	1	7	31	1889394	0.21468	1
BTAF1	366076	306	22	526110	140790	750672	6	0	8	6	27	2921724	0.214726	1
AMMECR1	157872	NaN	34	91299	28509	159939	2	1	1	6	40	2788851	0.214729	1
PPP2R1A	478211	896	-38	164034	49608	278928	5	4	3	10	51	1776723	0.214868	1
DTNBP1	118453	750	24	111228	28587	264303	1	1	4	13	46	3470142	0.214973	1
RIOK3	311512	215	57	151671	36465	247104	3	0	1	3	8	1303302	0.215017	1
GZMH	897577	582	3	68952	19851	161226	2	3	7	2	50	893256	0.215029	1
NRCAM	441225	682	1	376233	99138	653211	10	6	17	19	88	3195153	0.215178	1
SLC35D2	340302	400	21	96447	27573	208962	2	1	5	4	13	814359	0.21523	1
ZNF691	803442	334	27	79131	21372	19305	5	1	0	19	92	4186689	0.21524	1
GPR137C	356488	313	14	117780	35958	99567	3	0	3	24	121	7803861	0.215256	1
TMC2	778654	450	41	256932	70551	407979	11	8	14	1	23	584454	0.21533	1
EIF2B1	871640	315	40	86775	24375	267228	2	0	3	6	23	2009865	0.215563	1
S100A7L2	1140114	279	38	33774	7293	42939	4	0	4	5	39	901095	0.215745	1
TFEB	458237	251	49	132678	38493	229086	2	1	4	27	109	6944496	0.215933	1
CPB2	354901	679	53	123591	30147	235170	7	0	0	1	1	346827	0.216314	1
UBE3B	430972	428	37	303108	84279	634608	7	2	9	5	35	1839279	0.216346	1
WDR31	408268	248	31	105807	27573	195273	4	1	6	2	12	594477	0.216397	1
GRK1	785061	NaN	36	90987	25428	42237	4	2	0	9	52	2581644	0.216602	1
HDAC3	771583	353	25	125970	31395	395226	4	0	4	1	20	1076283	0.217042	1
CDS2	500170	482	24	128076	34086	369837	4	0	5	2	15	896337	0.217263	1
ZNF700	719617	678	-1	211965	50232	125307	6	1	1	8	33	1633554	0.217274	1
OR5M10	NaN	NaN	NaN	85137	25779	11232	7	2	0	6	104	2305563	0.217334	1
PMPCB	375620	620	8	139776	38064	324090	2	0	6	6	19	1519479	0.217387	1
STK38L	555677	345	37	137085	32214	327132	5	1	4	10	54	2882256	0.217412	1
CD300LD	698491	504	10	72579	21138	79677	2	0	3	8	27	1152840	0.217426	1
IPO4	974559	220	41	300807	92547	429390	4	4	8	13	74	3804801	0.217451	1
IL1RL1	240161	588	9	160173	41301	224991	6	3	2	6	20	1336257	0.217473	1
C1orf51	1213150	197	38	104949	32409	128700	5	2	1	13	43	2502942	0.217815	1
PZP	352696	301	19	419640	117507	831870	18	9	15	0	24	949377	0.217882	1
QTRTD1	426794	504	26	117078	32682	229086	4	3	0	9	59	3525873	0.217941	1
COL13A1	591993	561	26	205413	64857	613197	13	2	34	2	62	1544907	0.217988	1
EBNA1BP2	1068006	294	30	104910	26832	263484	5	1	3	1	5	348192	0.218257	1
HFM1	263616	615	-10	419484	102336	726687	20	1	27	2	34	1156389	0.218481	1
MMP10	510838	567	-16	136851	35022	212940	4	0	2	2	13	859911	0.218526	1
METTL14	238966	636	31	131313	33774	206271	3	0	4	8	15	1566903	0.218632	1
RBP7	744954	240	24	40209	8814	61308	1	0	1	10	35	2080806	0.218683	1
OR5AU1	730598	357	36	97812	29484	20826	3	1	1	11	63	1825200	0.21873	1
SFRP2	142627	793	-3	82524	22308	49725	3	1	2	19	113	4609527	0.219092	1
COL4A3	253951	211	10	470574	148473	1094652	26	4	28	10	59	2938143	0.219174	1
SLC4A8	527734	331	43	315120	86190	623142	9	5	13	2	26	1356537	0.2192	1
TAMM41	229249	423	35	90597	23712	188019	1	0	3	6	29	1967628	0.219466	1
RGS19	1032302	312	51	61854	17004	61425	3	0	1	16	81	3699150	0.219499	1
SERPINB4	174293	370	-5	113061	27456	187551	3	1	4	23	98	5515146	0.219538	1
RDX	137601	158	10	170781	40287	254943	5	0	2	2	9	858936	0.219584	1
FATE1	125659	NaN	4	52182	14508	121563	2	2	4	8	42	1108341	0.219652	1
KIFAP3	181109	743	2	231777	55458	382122	5	0	2	1	3	654303	0.219672	1
PRLH	492799	440	11	23049	8190	11934	2	1	2	4	40	791310	0.219795	1
FCAR	914047	573	-19	89778	21255	126477	6	0	4	12	103	3748680	0.219884	1
SBF2	530606	482	12	526695	140907	1036269	7	1	11	5	25	1960725	0.220216	1
CTNS	504736	354	20	115635	32253	242307	4	2	2	4	11	885417	0.220674	1
SNX25	295066	528	30	244335	59280	440973	9	0	10	0	10	500253	0.220827	1
RCBTB2	387005	404	41	156312	43056	293085	2	1	2	6	26	2022735	0.220846	1
EXOC3L1	1109491	150	46	200031	68484	152685	3	1	1	29	91	7289880	0.221239	1
C12orf54	904892	390	11	39624	9048	225810	2	1	2	8	19	1251549	0.221272	1
ALDH8A1	152922	364	19	135681	38649	159588	5	1	3	21	106	6456216	0.221287	1
ZCWPW1	1454967	172	57	187629	47658	446823	4	2	9	10	55	2643849	0.221365	1
TEP1	415850	401	-7	725829	221871	1131741	19	8	21	1	34	1745406	0.221401	1
LYZ	675242	361	13	42627	11310	97110	1	1	0	3	15	662883	0.221693	1
SRRM1	466068	348	27	246558	78585	313677	9	0	4	6	16	1158846	0.221697	1
CR2	447441	354	30	307944	84591	416169	17	4	14	1	18	557349	0.221832	1
IGF2BP3	494999	197	26	164385	45747	367380	10	0	9	3	15	712881	0.222034	1
USP9X	734477	NaN	38	733317	189228	729963	6	1	1	2	5	1633827	0.222799	1
DBF4B	1261173	175	29	176943	50388	384462	7	4	3	6	36	2157753	0.222883	1
CAPZA3	82407	911	-29	83694	21840	71136	3	1	0	3	7	744471	0.22301	1
HEATR1	461836	603	0	610584	162903	989118	11	1	9	3	18	2032680	0.22307	1
TRNT1	59117	1039	-15	124566	31395	164034	3	0	3	6	24	1525056	0.223148	1
CTSL2	339842	464	24	96915	23946	142740	2	0	1	11	50	4515576	0.22317	1
PPFIBP2	104307	853	12	250536	68055	610272	4	4	8	4	16	1171092	0.223801	1
KRTAP4-2	996799	468	-7	38415	9906	32175	2	0	0	17	75	2179710	0.223861	1
BICD1	387398	460	23	273624	73398	279864	11	6	5	2	13	697398	0.223867	1
TFG	345618	509	16	112632	31395	160173	4	0	0	2	12	1238133	0.224002	1
MED1	1434634	214	17	438555	124215	426933	9	4	6	2	19	1080846	0.224057	1
MRPS7	1723762	171	31	68172	18993	112905	2	0	2	27	183	7743333	0.224133	1
PSMB10	879834	158	50	75036	24882	108927	1	2	2	32	205	9726600	0.224168	1
TARP	164254	382	6	48750	12207	128115	6	2	5	0	7	140322	0.224454	1
NRIP3	595760	357	33	68211	19539	150930	2	1	3	3	32	2305173	0.22448	1
VEZF1	854628	182	27	144378	41184	129987	4	0	0	7	17	1807494	0.224517	1
ZNF202	386097	609	0	181272	49335	138294	3	1	1	7	40	2808585	0.224918	1
BNIPL	1614665	165	40	100269	29601	252135	3	0	3	8	18	1871961	0.225083	1
SLC44A3	329970	274	-13	186225	50115	364338	4	1	5	6	24	1544127	0.225349	1
CYR61	296507	345	13	106626	29328	77454	1	2	0	3	8	1126944	0.225659	1
PAPOLA	328369	576	19	214383	57291	482508	5	1	4	1	6	688116	0.225677	1
VANGL1	71378	604	7	144456	42627	143559	3	0	4	9	36	1197729	0.22581	1
IFNA21	137739	498	1	52494	14430	24687	3	2	0	5	34	1463592	0.226542	1
APOBEC3B	1413709	372	44	110097	27846	149292	3	3	0	6	65	2634411	0.22657	1
IFNB1	144026	601	5	52884	13338	17082	2	0	0	12	43	2045082	0.226711	1
CCDC180	378658	528	34	476697	119184	944892	8	9	0	5	20	2881203	0.22674	1
PLA2G2D	567393	501	23	42432	10452	102843	2	1	3	6	32	1494792	0.226784	1
PDCD1	559742	487	29	78585	24960	52533	10	2	6	1	35	545883	0.226923	1
FAM114A1	370538	352	63	160329	43719	268515	2	0	3	14	52	3822546	0.227084	1
TLL1	81353	538	-19	292851	72423	527436	9	1	10	0	11	599859	0.227175	1
UCN3	711034	519	-1	43758	13572	19890	3	1	0	3	8	463242	0.227199	1
RCHY1	461415	491	19	79755	15951	188955	1	1	1	4	7	788463	0.227209	1
CD2BP2	2312884	165	47	95706	27144	104715	3	2	2	27	157	5474235	0.227222	1
UPK2	1457410	180	55	49569	17472	98514	4	1	3	2	12	530985	0.227409	1
COQ10A	2878071	171	46	72072	21762	159705	3	1	0	3	15	1030107	0.227426	1
GNG11	228127	480	-12	21372	5070	35100	1	1	1	13	66	2038998	0.227598	1
KIAA1210	556208	NaN	8	472875	133419	250614	12	1	6	7	34	2302755	0.227873	1
ZMAT4	42867	678	-14	66339	17199	119691	7	0	7	5	38	721578	0.228027	1
MOCS2	204924	419	-5	74802	16458	115830	2	0	0	8	47	3102957	0.22804	1
B3GNTL1	303219	483	14	104481	28431	148824	6	1	6	4	22	724893	0.228322	1
PRKCA	206987	603	-27	195819	48126	525213	5	2	7	4	44	2355210	0.228655	1
STIM1	409663	476	31	193245	52689	400374	4	0	7	5	15	1086345	0.228715	1
GRID1	89265	965	-18	281697	80067	353808	14	6	16	4	25	758589	0.22876	1
PEX5L	307645	761	5	178776	47853	384228	12	4	12	2	38	875355	0.228814	1
PCSK5	96278	886	-24	264108	66300	467298	21	5	21	0	26	533598	0.228876	1
PGBD2	113516	547	-2	164619	44460	62478	4	0	3	29	254	9957051	0.228997	1
HAS2	25994	485	-22	153894	41379	75699	9	3	3	10	42	1147926	0.229197	1
TNFAIP3	315946	256	51	222339	59046	176436	6	2	1	17	83	5463198	0.229262	1
OSBPL1A	150936	360	35	278811	67626	617175	2	0	4	9	21	3274713	0.229452	1
UPF3B	762240	NaN	61	142506	32292	295659	4	0	1	1	3	431379	0.22949	1
C6orf89	836025	244	43	101478	26403	157950	3	0	4	13	97	3410784	0.229508	1
TREH	1449531	161	45	165906	45747	97812	5	0	4	32	261	10493964	0.229742	1
IDE	363888	236	23	296244	73242	556686	4	1	8	14	59	4809246	0.229755	1
KREMEN1	794944	335	-4	139347	39312	187317	4	3	3	5	26	1157130	0.22977	1
ARR3	188610	NaN	39	112788	31473	256581	1	1	4	11	39	3224559	0.229788	1
ASNSD1	418427	511	16	177528	49920	62244	3	0	0	3	10	1093638	0.229883	1
TXLNB	192994	504	14	193596	51051	186264	7	2	2	2	38	1058499	0.230086	1
RXRG	291474	623	-10	135057	38454	240903	7	1	3	5	50	1905579	0.23014	1
LNPEP	393651	469	46	291096	76986	420498	4	1	1	5	6	1491048	0.230144	1
SCAMP3	1574928	194	45	97188	28704	300807	3	1	3	1	9	651690	0.230159	1
OR6K2	175690	966	2	87633	26442	14391	5	1	0	11	156	3783780	0.230281	1
CSNK2A2	862670	292	15	102843	25506	236106	3	0	0	1	1	413205	0.230282	1
LIN54	667566	169	45	206856	62010	277290	4	0	2	1	6	734838	0.23031	1
ASPH	423823	377	14	293280	69537	876096	5	1	14	12	58	4157790	0.230503	1
HTR4	89834	578	10	135330	38415	226980	6	2	5	12	49	2216136	0.230509	1
OR2J3	155147	738	1	83265	26130	14976	4	0	1	15	76	3181191	0.230612	1
C15orf59	313132	435	29	78975	24687	42471	4	2	0	7	48	2236260	0.230651	1
CPT1A	619314	303	45	224094	60684	391131	7	4	3	3	19	1383018	0.230687	1
THBS4	354204	746	36	274404	73086	499356	5	0	12	7	30	2403531	0.230794	1
GNRHR	209065	767	35	97032	19383	71838	2	1	0	13	49	4243824	0.230824	1
CEP85	958818	217	26	215709	58188	333333	6	0	1	1	4	672516	0.230997	1
ITLN1	1048810	583	27	90285	23205	226278	4	0	0	1	1	370305	0.231012	1
ACACA	526151	346	13	682266	186693	1889316	9	3	19	9	47	4888026	0.231173	1
SMG7	716427	385	25	356655	97188	574353	11	3	6	1	9	746148	0.23119	1
TRMT1L	344321	458	-3	209118	55068	290043	3	0	2	6	39	2928666	0.231824	1
SEC61G	277856	325	-11	20787	4836	82485	1	0	1	4	16	1144455	0.231905	1
SFXN3	744964	188	46	92196	26910	253656	1	1	6	23	109	5257395	0.232062	1
ZC3H14	169650	686	-1	247572	63882	441558	4	2	3	3	16	1194297	0.232076	1
RNF214	436617	360	36	197925	55731	312741	3	1	1	2	8	1267188	0.2321	1
VWC2	53908	941	-13	89388	26091	42120	3	0	1	14	161	5305248	0.232185	1
CYP26B1	72898	411	-5	138840	43563	70551	3	2	1	4	25	1401699	0.232457	1
SELT	370681	397	34	56589	14781	117000	1	0	2	35	119	8819694	0.232545	1
SPINT4	777303	359	16	29640	6864	85293	2	0	5	7	52	1842321	0.23258	1
FLT3LG	2173457	290	44	65247	21333	89739	2	0	2	6	47	1533129	0.232642	1
DCPS	367696	426	30	93678	27300	106119	2	2	0	30	130	9004320	0.232647	1
CBLN3	897133	265	40	53664	19578	87048	5	3	2	4	61	1463046	0.232912	1
PNPLA3	155890	393	24	133380	39546	199368	3	1	3	25	89	7143006	0.23311	1
ZP4	14616	1051	-30	151671	43602	250731	6	2	1	1	4	508131	0.233127	1
ZNF763	719617	678	-1	114387	26715	210132	5	0	3	8	33	1633554	0.233128	1
FCF1	886320	184	43	59670	13923	185094	1	0	5	6	33	1336647	0.233268	1
TRIM35	353563	561	8	136266	39702	101439	2	2	0	7	26	1866969	0.233328	1
PKP2	292831	381	-18	244686	70980	338715	8	2	6	10	50	3006471	0.233602	1
PTPRO	367328	560	-14	348855	90480	611091	21	3	22	2	28	909909	0.233811	1
WDR77	397926	461	18	96993	27846	221364	1	0	5	18	104	5548101	0.233955	1
MAP9	44097	944	-5	189969	43563	218556	10	4	4	0	8	262119	0.234018	1
TGFBR2	80018	417	-9	166920	44499	177021	4	0	3	2	8	463398	0.234284	1
KRT5	1280474	464	36	162435	48750	224757	12	10	12	1	34	552474	0.234346	1
FKBP6	902769	422	52	96603	27417	182988	5	0	4	11	60	2638974	0.234349	1
TMPRSS11D	210733	767	22	118677	32838	237510	2	1	2	7	30	1963299	0.234507	1
BCL10	348743	384	3	64272	18798	69615	1	1	1	5	32	1421199	0.234539	1
MAB21L2	214274	848	18	96954	29406	26676	4	1	1	4	28	1772355	0.23454	1
ZACN	1611239	218	22	113997	34944	128349	5	0	1	1	14	593034	0.234717	1
VPS54	352987	407	20	281814	71760	432783	9	1	9	2	13	771108	0.235118	1
DPY30	375703	295	27	29445	7527	80496	1	0	1	44	286	15859038	0.235189	1
TAL1	364960	414	3	87555	30264	57096	4	2	2	2	11	471432	0.235472	1
ZNF326	176748	215	12	168948	41067	332397	2	1	2	5	9	1173354	0.236166	1
C16orf45	544403	200	30	65091	16107	92547	2	1	1	50	282	13674960	0.236174	1
FAM149B1	NaN	NaN	NaN	164775	45942	115362	6	0	1	2	16	684528	0.236408	1
ACTBL2	160055	456	3	102258	30303	23985	3	1	0	23	85	5103618	0.23657	1
TLK1	439214	379	38	226824	57135	514215	3	2	3	10	36	3530904	0.236649	1
PSG2	263820	178	-32	93405	27105	315900	2	1	2	6	34	1741389	0.23676	1
A2ML1	300254	407	12	413400	113802	870363	19	12	30	0	42	984165	0.236802	1
TPCN1	429315	206	36	255138	70005	677196	5	1	11	4	30	1860144	0.236839	1
PTPRT	17956	1018	-72	411528	115791	797823	20	8	25	0	33	913614	0.236867	1
NXPE3	549022	421	12	154284	44148	134082	5	2	0	3	3	494715	0.237141	1
PHF20L1	195342	773	-4	302718	75192	392184	11	5	7	10	43	2284347	0.237375	1
MFHAS1	164853	395	34	277914	92625	61542	3	0	0	19	70	6305949	0.237449	1
CFHR1	205744	852	-29	93600	24921	98046	6	0	5	2	22	722943	0.237934	1
RPA3	218130	434	16	35646	8814	87282	1	0	1	6	32	1939353	0.238102	1
GTF2A2	521844	172	33	32175	8307	99333	1	0	2	13	101	5175573	0.23814	1
PTH	264102	625	-6	32955	8697	27612	1	0	0	8	34	2353611	0.238168	1
SOX7	110362	481	9	103467	33774	16965	4	0	0	2	5	375804	0.238479	1
HEATR4	602175	149	42	274248	76752	472212	12	2	7	5	35	1587690	0.238701	1
DCST1	1696720	214	44	198783	57096	418860	3	3	2	1	8	964119	0.238812	1
AMN1	313930	228	11	73437	20280	103077	2	0	4	8	23	1609608	0.238864	1
STH	365925	469	18	35217	10530	31239	1	0	0	50	238	14344083	0.239119	1
IFITM2	1454043	344	48	36660	10725	61191	2	0	0	6	55	1437306	0.239144	1
ALPK1	185655	467	42	349986	94029	560430	13	4	7	15	113	6161532	0.239601	1
ATP5I	639827	489	12	20904	5538	50310	1	0	0	16	90	4993521	0.239615	1
GPC5	12353	1007	-9	159783	44616	168480	12	4	6	7	56	1277445	0.239629	1
RAB6B	530925	520	25	61308	15327	225342	4	2	11	1	15	344799	0.239728	1
MRPS18B	2080582	271	32	72540	21177	160875	3	1	2	9	65	2978937	0.239816	1
LMCD1	92154	581	1	102414	28392	152334	3	2	4	23	162	8086806	0.239867	1
BAI3	11277	1175	-22	436332	112281	648180	38	7	39	3	113	1635426	0.240091	1
TMEM194A	2026922	199	41	125892	34281	185679	4	1	1	2	23	1031823	0.240238	1
TRMT10C	549735	614	11	113880	28392	27261	4	0	0	12	74	3923166	0.240314	1
ATP13A3	324325	269	27	352872	92313	618345	8	0	11	7	46	2942199	0.240363	1
MAGEB18	33808	NaN	-25	95355	26325	5382	4	2	0	33	631	12016641	0.240619	1
CRNKL1	230275	685	10	243009	61776	378027	9	2	2	1	6	631800	0.24079	1
TFDP3	76255	NaN	28	111774	30966	9711	4	1	0	32	231	10188438	0.241172	1
CHGA	325312	387	30	128817	35217	110682	5	0	3	17	84	5225688	0.241196	1
C10orf90	122926	478	-50	193986	55458	234936	10	2	1	1	7	406926	0.241278	1
IL12RB2	454381	466	-4	243672	66261	372060	3	2	3	5	21	1403064	0.241312	1
SCML2	82842	NaN	17	198978	53625	310167	4	0	3	3	17	1184625	0.24133	1
HOXD3	245316	874	13	116649	36270	37440	4	2	0	24	65	3359070	0.241539	1
FBL	1289328	526	23	89622	27378	147888	3	0	2	2	10	555672	0.241877	1
SYT13	173203	637	14	116259	35958	120744	4	1	3	5	30	1122264	0.241886	1
SCAND1	1257811	144	50	45981	17667	7254	2	0	1	15	75	2963961	0.241981	1
PARP9	410045	404	35	246597	64155	291330	2	2	3	32	96	8166834	0.242107	1
MYLK	284041	449	32	536523	150150	819000	21	10	16	3	40	1754376	0.24214	1
XPO5	1249985	194	51	344955	92508	659412	7	4	6	4	31	1620684	0.242336	1
NPPB	519155	207	43	36504	12051	68094	3	0	2	3	12	437229	0.242469	1
RCN3	2080142	210	41	92508	25779	157833	3	0	4	4	19	823095	0.242474	1
CSGALNACT1	171847	356	17	150111	39780	184041	2	2	3	2	13	759252	0.242614	1
TCF12	203021	599	27	209625	56901	575055	4	0	4	3	13	1321203	0.242628	1
ESD	272205	820	63	82797	20280	162981	2	0	1	13	41	3599817	0.242764	1
AXDND1	495704	593	-2	300846	71799	812097	11	6	13	1	22	982332	0.242938	1
EMILIN3	383021	309	5	201201	69420	46215	6	1	1	50	274	16522623	0.243016	1
ZKSCAN7	419284	467	45	213564	55887	470691	4	1	1	2	4	1129674	0.243144	1
ERBB3	2693176	215	38	388557	110565	620802	12	3	6	9	43	2941575	0.243297	1
EPB41L5	218487	406	27	231192	59085	573534	5	3	5	21	90	6746727	0.243354	1
OVCH1	100195	539	-5	325728	85527	433719	13	3	9	2	18	1003353	0.243693	1
EP400	408569	269	27	859131	261378	1147536	20	9	15	5	68	3938610	0.243736	1
NID2	234008	432	20	381888	110916	491049	17	3	12	5	38	1884246	0.243828	1
FAM122B	293030	NaN	27	85332	21372	181701	1	0	0	3	3	679731	0.243995	1
CX3CL1	749108	159	39	106236	34632	67275	2	1	0	9	18	2425839	0.244136	1
ALDH1B1	272380	622	3	139269	43017	15093	4	1	0	12	85	4321356	0.244159	1
TMEM209	414437	266	34	161499	42315	269100	4	0	3	12	63	3981237	0.244484	1
AXIN2	212714	773	-26	233376	67080	199602	6	1	3	5	21	1358799	0.244769	1
SYCE2	1886809	335	40	65832	16419	170586	2	0	1	7	18	1331382	0.244806	1
SPAM1	87688	541	-19	147498	39351	63765	14	0	6	1	6	141453	0.244836	1
NGF	537568	558	6	65481	19929	29250	4	3	0	2	11	335439	0.244877	1
MRPS21	1213150	197	38	25545	6279	42939	1	0	2	24	136	5337345	0.244993	1
ERLIN1	1070291	198	25	101712	25935	139113	1	0	2	4	16	1282632	0.245206	1
RNMT	142674	697	42	139893	32214	218790	4	0	3	3	4	570960	0.24524	1
HOXC10	1257445	274	23	94380	26715	35334	3	0	2	5	7	740610	0.2454	1
PRKX	104714	NaN	11	102297	27456	101556	1	0	0	4	15	1322802	0.245552	1
BPGM	388879	392	23	72696	19500	61425	2	0	0	5	18	1512030	0.245634	1
TBX21	1118277	217	27	146250	44226	112905	9	0	9	3	31	886236	0.24592	1
PKP4	212889	532	5	330915	97656	493389	9	3	6	1	12	901719	0.245993	1
MYLK4	470344	285	28	114348	27339	295893	4	0	7	4	43	2219100	0.246	1
GNL2	445473	274	30	209820	54366	361062	5	0	6	4	20	1081509	0.246203	1
TNFRSF13B	1122696	237	2	82017	23283	105183	7	2	4	11	118	2316288	0.246353	1
GUCY2F	131317	NaN	29	311883	86151	443313	6	0	12	17	80	4432740	0.246529	1
RTN4IP1	223177	271	40	111696	31395	185796	2	1	0	12	26	4342611	0.246572	1
ESRP1	467699	426	31	194727	54366	251199	6	0	6	1	7	317499	0.246803	1
MNAT1	261238	578	5	90090	21996	248625	1	0	4	3	24	1496001	0.246882	1
SCD	1162653	171	42	100776	27924	158886	3	1	1	2	5	411879	0.246959	1
SLC25A30	680643	296	78	83616	23088	187785	1	1	2	18	77	3977181	0.247034	1
CD81	911893	584	36	67977	18486	128817	1	0	6	8	55	1849926	0.247181	1
ANKRD39	822597	392	46	50583	15639	69615	2	0	0	12	82	4149015	0.247316	1
CLEC4A	142724	300	23	69381	16497	198432	2	0	2	11	28	1925937	0.24733	1
TEF	1407073	187	64	89427	26988	40131	2	0	1	16	67	2459418	0.24742	1
KRTAP10-8	874480	461	25	70434	21294	24687	3	1	0	50	321	14239017	0.247533	1
C1orf185	NaN	NaN	NaN	57369	14703	0	2	0	0	50	752	26399061	0.247596	1
KRT18	1635177	181	43	119223	35451	138177	2	1	2	7	26	1578135	0.247831	1
ITGAE	500884	176	28	334737	93717	669825	11	2	10	2	16	1042743	0.247837	1
ALG6	133567	477	2	146406	37986	311337	3	2	4	19	50	3224988	0.247879	1
MOBP	161535	694	18	24726	4992	36621	1	1	0	24	104	4817397	0.247884	1
ZBTB37	443726	385	13	144183	41847	254475	4	0	3	13	46	3636048	0.248289	1
AMOTL2	303429	189	21	211536	66807	198198	6	0	3	6	30	2370342	0.248569	1
GSTA1	539666	498	11	64779	16302	259038	2	3	3	12	69	3531567	0.24861	1
MEF2A	197556	416	12	155298	43134	165087	5	1	5	26	115	6123390	0.248826	1
SPO11	181292	604	9	115557	29640	279864	4	0	3	2	5	614055	0.248983	1
HIST1H2AM	228884	634	40	34476	11973	41769	1	0	1	44	149	9331218	0.249022	1
OPRK1	147912	861	-14	104559	30576	52884	4	3	0	6	65	2402517	0.249195	1
TNIP1	892080	382	27	181857	49686	380484	6	2	4	1	9	768885	0.249407	1
SNX10	918425	418	29	60021	13689	142623	3	0	6	9	47	2107638	0.249444	1
HUWE1	888642	NaN	47	1222104	351429	1222065	18	7	11	1	22	1756872	0.24947	1
GPR18	NaN	NaN	NaN	91143	25857	26793	1	0	0	26	198	8166951	0.249498	1
CD4	2819394	232	40	129129	36192	202293	5	2	6	4	30	1540890	0.250018	1
UTP15	403014	289	42	147849	39936	280683	4	0	2	9	61	3964623	0.250095	1
SMARCA2	113887	805	18	454545	119340	740376	7	2	5	4	38	2907333	0.250169	1
C9orf41	95299	649	-13	116961	30225	150111	4	0	0	1	0	329667	0.250438	1
TMEM71	166227	872	-6	86346	21762	212004	5	2	10	1	18	516711	0.250474	1
GPM6A	123418	931	-23	80496	21411	216684	6	2	9	5	24	717210	0.250849	1
ENPP5	62118	819	16	134160	35022	80730	9	0	0	0	0	115752	0.251374	1
ASAP1	264818	427	30	321906	88062	767520	8	0	5	0	5	855582	0.251484	1
NUDT14	872033	260	25	60801	19578	73593	2	1	3	7	50	1308489	0.251506	1
IKZF3	1607516	292	26	147303	35217	355212	11	5	3	4	30	987948	0.251662	1
SCIN	119569	510	-1	204750	53586	147888	9	0	8	2	23	885690	0.251742	1
XKR9	241667	562	22	105144	27066	62712	3	0	3	13	69	3337308	0.251928	1
ANO2	349024	712	13	287001	75582	429858	16	9	17	1	29	657930	0.251968	1
AKR1A1	873800	161	27	91845	26559	171171	3	0	2	14	60	3774030	0.252119	1
KRT4	1781225	288	27	164697	47892	211068	6	2	11	31	218	5613504	0.252169	1
CEP63	222647	321	12	213876	51597	322335	3	1	2	6	22	1831557	0.25222	1
ACSS3	26211	1037	-20	192816	55575	300105	12	2	14	10	61	1324245	0.252563	1
CCDC109B	211934	479	26	96408	25155	182754	2	0	3	25	107	6930690	0.252566	1
SHISA4	736064	208	24	54756	16614	124722	3	2	3	3	13	647478	0.25267	1
MESP2	934542	212	37	104091	36075	25155	3	2	0	3	62	1691391	0.252717	1
KLHDC1	627751	342	18	120393	28314	203814	2	1	5	17	95	4375449	0.252745	1
TEX30	195534	475	24	65754	16614	66222	2	0	1	50	210	12552696	0.253109	1
FERMT2	309280	188	12	200421	49491	323271	6	2	7	8	32	1976442	0.253193	1
NDUFAF5	125337	703	-6	102609	26091	240084	1	0	0	3	8	999648	0.253258	1
ZNF285	715346	528	-44	168402	40443	93600	14	4	1	2	38	611403	0.253287	1
TMEM171	447937	584	21	88608	27105	74529	4	1	1	21	97	3860649	0.253444	1
CTDSPL2	697417	534	37	133926	35607	302562	2	0	1	2	6	1404195	0.253659	1
LMO3	149303	802	-15	42120	10530	124254	3	1	4	8	160	3741270	0.253671	1
CEP128	127660	629	-21	316992	78117	517140	7	3	8	7	61	2998086	0.253764	1
C11orf45	NaN	NaN	NaN	40599	12051	53586	1	0	3	6	105	2334189	0.253895	1
TAS2R4	200522	844	14	80574	24726	11583	2	1	0	41	188	7972887	0.253913	1
PALM2-AKAP2	250166	485	18	305058	87477	360711	15	4	0	0	4	448188	0.254243	1
EDAR	358833	424	14	127530	35217	205803	5	1	4	28	128	6657612	0.254315	1
CXorf66	66755	NaN	14	100620	27612	93249	5	2	1	21	122	4662489	0.254366	1
IGFBP4	1202660	149	21	70746	21567	72657	3	1	1	50	250	12067029	0.254379	1
ST18	155128	793	-15	298467	78741	499590	25	11	24	1	40	713115	0.254408	1
LEF1	231204	771	22	124020	32409	308178	6	0	11	4	25	1211964	0.25445	1
DOK6	50550	968	-4	96135	23673	164151	6	3	4	11	100	2843919	0.255316	1
NDE1	495419	283	26	108927	28197	472797	5	0	5	6	14	1397604	0.255346	1
DPPA2	22565	1096	-19	86697	21996	167661	7	0	9	5	32	636168	0.25535	1
USP21	728669	234	37	154206	50076	421083	7	1	6	9	47	2753400	0.255519	1
SLC7A6OS	819579	281	46	87126	24024	112671	2	1	0	18	55	4370262	0.25603	1
SLC36A2	821078	530	48	133653	40443	202878	4	2	6	6	38	1348932	0.256124	1
LGI3	587455	196	50	150384	45591	170586	4	1	3	5	47	1738581	0.256336	1
GLDN	317532	443	10	153660	44304	236925	5	1	8	7	38	1703715	0.256489	1
CHEK2	515703	219	-8	167973	45084	338364	4	1	4	1	11	688272	0.256516	1
RUFY3	262894	589	25	219375	57681	436527	5	0	4	1	11	828048	0.256542	1
C6orf201	181759	353	22	40521	10374	324792	2	0	6	12	78	4038996	0.256564	1
MMP24	1290513	170	45	157326	44148	113958	7	1	4	18	137	4475835	0.256592	1
MKL2	185822	323	12	290628	84942	512343	7	3	4	3	14	1465386	0.256636	1
TMEM169	603452	419	35	81783	23283	88569	3	2	1	50	312	14901432	0.256642	1
MRM1	468055	548	23	94926	31200	182286	1	0	3	4	22	1619709	0.256929	1
EP300	1167197	154	42	675597	186108	681291	14	2	4	0	6	867399	0.256975	1
MAP1B	410285	427	30	675675	193752	171405	17	1	3	19	57	5027529	0.257135	1
CRYBG3	123806	723	0	292851	74880	421785	7	0	3	3	5	832962	0.257224	1
DYRK3	491162	261	34	164190	46176	109746	3	0	2	13	87	4995159	0.257296	1
IL10RB	861800	317	87	93795	23673	168012	1	0	3	10	47	2370147	0.257466	1
LCA5L	339359	346	25	190983	48048	146016	5	1	1	23	79	5797194	0.257527	1
TMEM190	1028808	209	19	50583	14235	45162	2	0	3	5	20	632541	0.257687	1
RUNX1T1	5155	1075	-30	170469	47853	334269	22	4	24	0	28	382122	0.257697	1
GPRC5B	258899	641	9	108342	34749	80496	3	1	1	5	23	1433133	0.257818	1
DFNA5	254601	464	21	138372	40287	211770	5	2	2	6	42	2259816	0.25805	1
CLNK	214087	1111	17	129012	29991	219258	7	4	8	5	26	771810	0.258111	1
MYO9A	1084708	386	22	725205	188682	941031	12	1	15	2	23	1993758	0.258315	1
TSPYL6	619188	448	9	111267	32994	28665	5	2	0	10	46	1861197	0.258488	1
NCOA1	343965	403	33	407550	113451	434304	11	1	6	17	60	3971448	0.258705	1
CCDC17	873800	161	27	167973	56316	42471	6	1	2	11	46	2827110	0.258711	1
AGMAT	656850	162	31	95394	31317	111384	2	1	2	29	134	8221278	0.258881	1
VPS37B	977561	184	37	77181	24726	66807	1	0	2	50	368	13151424	0.258895	1
SAMD12	190644	575	17	59241	15990	146250	2	1	0	9	30	2432508	0.259031	1
UGT2B28	21304	997	-3	149838	38766	158886	11	1	3	0	4	197652	0.259036	1
TNFSF8	241285	318	-9	65676	18213	113373	3	2	0	6	22	1440699	0.259216	1
MAGEA4	125659	NaN	-21	85683	26403	48087	4	1	1	15	120	4808076	0.259223	1
GIPC1	981470	204	34	90831	29211	90207	7	2	5	4	14	454818	0.259451	1
NEFM	182761	573	-2	253500	69771	62595	5	2	0	17	69	3707301	0.259481	1
DNALI1	445473	274	30	78975	22230	216567	3	1	5	27	127	6745869	0.259483	1
SPTA1	177547	940	1	697671	175617	1406340	60	20	104	1	127	1623921	0.259823	1
IQCJ	170382	930	-11	49959	13455	90675	6	1	1	1	6	218205	0.259871	1
GNA12	764046	392	30	105105	30381	166491	3	3	2	11	38	2249910	0.260149	1
RERGL	21334	1070	-35	59319	15093	111384	4	3	3	3	17	273663	0.260175	1
SLC27A3	1687837	175	33	195234	65793	288288	3	1	4	10	58	3922347	0.260194	1
NSMAF	200152	574	17	283725	70785	714870	6	2	6	0	8	785655	0.260442	1
HPSE2	147172	933	2	168831	49374	378027	6	1	7	7	30	1363986	0.260489	1
PLA2G4A	265620	592	-18	217776	53430	392418	6	2	1	0	3	445848	0.260897	1
ODC1	732059	270	47	132210	34632	212706	4	0	5	22	105	6949683	0.260961	1
ZFPL1	3267059	207	46	85332	27105	218088	4	1	1	3	8	758472	0.260997	1
CAP1	873408	387	23	135447	37245	265122	2	0	1	2	14	1134237	0.261091	1
AUNIP	746382	372	24	99996	26598	68796	1	0	1	50	297	16487757	0.261123	1
ZDHHC7	481076	273	28	97461	27261	151164	5	1	0	2	10	567138	0.261254	1
GPC4	66980	NaN	40	158340	40911	197730	2	0	3	9	36	2433678	0.261359	1
ZC2HC1B	NaN	NaN	NaN	64428	17121	78975	3	1	3	6	106	2364648	0.261378	1
P2RX5	504736	354	20	121017	32838	208026	2	1	0	5	12	1707264	0.261501	1
SLC35F6	1266654	231	40	101361	31785	82719	3	0	2	3	45	1704300	0.261578	1
SULT1C4	361799	483	-2	88920	20241	180297	3	0	2	9	58	3614130	0.261598	1
DYM	241451	414	57	191607	51051	337779	4	1	3	16	42	4422483	0.261785	1
RAPGEF1	629872	355	32	309387	87477	427869	11	3	13	3	50	2369991	0.261818	1
TINAGL1	1061386	197	37	132366	37050	155142	7	0	10	1	16	379080	0.262156	1
DLG3	306369	NaN	30	257907	71097	270504	4	2	6	8	55	2689596	0.262274	1
NEK1	245919	399	12	366600	90753	384930	7	1	10	5	28	1441674	0.262432	1
PIK3CG	171312	700	32	307593	84240	278109	19	11	10	0	21	362349	0.262506	1
EPHA6	89830	1046	-18	329199	89427	382473	18	5	13	9	56	1738269	0.262589	1
POPDC3	108747	650	2	80925	22503	76284	4	0	0	1	2	208494	0.262943	1
JAM2	534549	723	26	85683	23478	193167	3	0	5	9	18	1306344	0.263053	1
SEMA3A	61350	601	-27	222651	55809	398151	17	4	16	1	21	511797	0.263134	1
ABCA10	137274	415	-43	446550	112242	821808	9	4	15	2	30	1501266	0.263137	1
TDG	1190703	281	40	118989	29484	201825	2	0	2	1	8	679692	0.263151	1
PIWIL3	399624	395	-4	252369	66924	503217	11	5	7	2	35	1358253	0.263578	1
RAD54B	544647	412	23	259584	66729	297882	6	0	4	5	14	1056237	0.264065	1
PRR4	365490	676	5	47970	13806	734994	1	0	0	0	0	748800	0.264081	1
IL22	383435	623	12	51363	13923	122850	2	0	3	28	185	7863804	0.264137	1
CREG2	475096	278	19	79521	24258	78858	3	2	1	32	146	8219367	0.264167	1
[truncated: 16,864 more rows]

## Sheet: Table S8
Supplemental Table S8: IntOGen mutational significance analysis
GENE_ID	SYMBOL	FM_PVALUE	FM_QVALUE	FM_EXC_CAUSE	SAMPLE_FREQ	SAMPLE_TOTAL	SAMPLE_PROP	CLUST_ZSCORE	CLUST_PVALUE	CLUST_QVALUE	CLUST_EXC_CAUSE	CLUST_COORDS	INTOGEN_DRIVER	XREFS
ENSG00000155657	TTN	0	0		37	39	0.948718	-	-	-		-	1	COSMIC:COSM109466,COSMIC:COSM175427,COSMIC:COSM177844,COSMIC:COSM177845,COSMIC:COSM177846,COSMIC:COSM177847,COSMIC:COSM226941,COSMIC:COSM228330,COSMIC:COSM228331,COSMIC:COSM228332,COSMIC:COSM228333,COSMIC:COSM228334,COSMIC:COSM268205,COSMIC:COSM268207,COSMIC:COSM268208,COSMIC:COSM304861,COSMIC:COSM78720,COSMIC:COSM84659,ESP:TMP_ESP_2_179435877,ESP:TMP_ESP_2_179437711,ESP:TMP_ESP_2_179444567,ESP:T…
ENSG00000148400	NOTCH1	0	0		25	39	0.641026	0.715854	0.237041	0.243119		[450,460]:4	1	COSMIC:COSM136756,COSMIC:COSM136757,COSMIC:COSM28752,COSMIC:COSM99613,COSMIC:COSM99614,ESP:TMP_ESP_9_139401836
ENSG00000141510	TP53	0	0		37	39	0.948718	3.47446	0.000255939	0.00285098		[248,249]:4,[266,266]:2,[278,280]:4,[286,286]:2	1	COSMIC:COSM10654,COSMIC:COSM10656,COSMIC:COSM10705,COSMIC:COSM10710,COSMIC:COSM10726,COSMIC:COSM10728,COSMIC:COSM10768,COSMIC:COSM10786,COSMIC:COSM10794,COSMIC:COSM10812,COSMIC:COSM10817,COSMIC:COSM10886,COSMIC:COSM10939,COSMIC:COSM11073,COSMIC:COSM11148,COSMIC:COSM11354,COSMIC:COSM119678,COSMIC:COSM119679,COSMIC:COSM119680,COSMIC:COSM119681,COSMIC:COSM120005,COSMIC:COSM120006,COSMIC:COSM120007,C…
ENSG00000000971	CFH	2.22045e-16	3.48299e-13		29	39	0.74359	-	-	-		-	0	COSMIC:COSM107828,dbSNP:rs148445529
ENSG00000147889	CDKN2A	2.22045e-16	3.48299e-13		18	39	0.461538	2.58089	0.00492734	0.0111842		[130,130]:2,[138,148]:4	1	COSMIC:COSM12473,COSMIC:COSM12476,COSMIC:COSM12481,COSMIC:COSM12512,COSMIC:COSM12547,COSMIC:COSM126615,COSMIC:COSM126616,COSMIC:COSM126617,COSMIC:COSM126618,COSMIC:COSM13671,COSMIC:COSM13675,COSMIC:COSM251413,COSMIC:COSM251414,COSMIC:COSM33799,COSMIC:COSM99730,COSMIC:COSM99731,dbSNP:rs121913384,dbSNP:rs121913386,dbSNP:rs121913387,dbSNP:rs121913389,dbSNP:rs34170727
ENSG00000129474	AJUBA	5.66214e-15	7.40136e-12		10	39	0.25641	-	-	-		-	1
ENSG00000099139	PCSK5	9.26481e-13	1.03806e-09		24	39	0.615385	-	-	-		-	0
ENSG00000132383	RPA1	1.45357e-11	1.42504e-08		10	39	0.25641	-	-	-		-	0	dbSNP:rs143105728,dbSNP:rs200741601
ENSG00000081052	COL4A4	2.19692e-11	1.91449e-08		30	39	0.769231	-	-	-		-	0	COSMIC:COSM122295,COSMIC:COSM221983,ESP:TMP_ESP_2_227954690,dbSNP:rs201859109,dbSNP:rs67231780
ENSG00000183091	NEB	7.32803e-11	5.74737e-08		28	39	0.717949	-	-	-		-	1	COSMIC:COSM206382,ESP:TMP_ESP_2_152501044,ESP:TMP_ESP_2_152536476,dbSNP:rs200758495,dbSNP:rs201731351
ENSG00000124406	ATP8A1	1.57999e-10	1.12653e-07		23	39	0.589744	-	-	-		-	0	COSMIC:COSM109840,COSMIC:COSM274099,ESP:TMP_ESP_4_42618091,dbSNP:rs145266451
ENSG00000134250	NOTCH2	4.27214e-10	2.7922e-07		24	39	0.615385	-	-	-		-	0	ESP:TMP_ESP_1_120506185
ENSG00000185567	AHNAK2	5.7863e-10	3.49092e-07		28	39	0.717949	0.370167	0.355629	0.357117		[1732,1732]:2	0	COSMIC:COSM292543,ESP:TMP_ESP_14_105414309,dbSNP:rs199554131,dbSNP:rs200522679,dbSNP:rs201939750
ENSG00000148606	POLR3A	1.18392e-09	6.19032e-07		18	39	0.461538	-	-	-		-	0	ESP:TMP_ESP_10_79793631
ENSG00000128881	TTBK2	1.11847e-09	6.19032e-07		13	39	0.333333	-	-	-		-	0	ESP:TMP_ESP_15_43038132
ENSG00000187775	DNAH17	2.43494e-09	1.19358e-06		28	39	0.717949	-	-	-		-	0	ESP:TMP_ESP_17_76456126,ESP:TMP_ESP_17_76456284,ESP:TMP_ESP_17_76462745,ESP:TMP_ESP_17_76502950,ESP:TMP_ESP_17_76533441,dbSNP:rs11658149,dbSNP:rs146469560
ENSG00000121310	ECHDC2	4.5036e-09	2.07775e-06		3	39	0.0769231	-	-	-	T	-	0	dbSNP:rs145644401
ENSG00000117868	ESYT2	1.0175e-08	4.43346e-06		6	39	0.153846	-	-	-		-	0
ENSG00000050767	COL23A1	1.8255e-08	7.53546e-06		20	39	0.512821	1.59074	0.0558335	0.0724326		[208,208]:2	0
ENSG00000138829	FBN2	8.6179e-08	3.37951e-05		24	39	0.615385	-	-	-		-	1	COSMIC:COSM281078,COSMIC:COSM281079,ESP:TMP_ESP_5_127697438,ESP:TMP_ESP_5_127866426,dbSNP:rs149691045,dbSNP:rs200481467,dbSNP:rs202050578
ENSG00000130402	ACTN4	3.49832e-07	0.000130654		19	39	0.487179	-	-	-		-	0
ENSG00000187955	COL14A1	7.31849e-07	0.000260904		28	39	0.717949	-	-	-		-	0	COSMIC:COSM168115,ESP:TMP_ESP_8_121216031,ESP:TMP_ESP_8_121279052,dbSNP:rs201698583
ENSG00000166147	FBN1	8.66482e-07	0.00029547		28	39	0.717949	-	-	-		-	0	COSMIC:COSM177751,COSMIC:COSM189580,ESP:TMP_ESP_15_48738893,ESP:TMP_ESP_15_48779572,dbSNP:rs112945086,dbSNP:rs137854466,dbSNP:rs143544916,dbSNP:rs201001403,dbSNP:rs202168958
ENSG00000168477	TNXB	1.00203e-06	0.000327456		28	39	0.717949	-	-	-		-	0	COSMIC:COSM277761,ESP:TMP_ESP_6_32087614,dbSNP:rs143840297,dbSNP:rs185207099
ENSG00000075391	RASAL2	1.24663e-06	0.000391094		14	39	0.358974	-	-	-		-	0	ESP:TMP_ESP_1_178252722
ENSG00000142185	TRPM2	1.7202e-06	0.000518904		16	39	0.410256	-	-	-		-	0	COSMIC:COSM235519,dbSNP:rs150593294
ENSG00000091986	CCDC80	1.98554e-06	0.000576763		11	39	0.282051	-	-	-		-	0	dbSNP:rs117007322,dbSNP:rs150960729
ENSG00000196218	RYR1	2.61165e-06	0.000731541		32	39	0.820513	-	-	-		-	0	COSMIC:COSM137172,ESP:TMP_ESP_19_38980939,dbSNP:rs113665507,dbSNP:rs12981175,dbSNP:rs147918857,dbSNP:rs201847439,dbSNP:rs201976186
ENSG00000131844	MCCC2	4.66354e-06	0.00126125		6	39	0.153846	-	-	-	T	-	0
ENSG00000186868	MAPT	4.87635e-06	0.00127484		19	39	0.487179	-	-	-		-	0	COSMIC:COSM261916
ENSG00000145725	PPIP5K2	6.36202e-06	0.00160959		12	39	0.307692	-	-	-		-	0
ENSG00000140479	PCSK6	7.29659e-06	0.00178835		12	39	0.307692	2.56721	0.00512607	0.0111842		[562,562]:2	0
ENSG00000263002	ZNF234	7.71699e-06	0.00183407		7	39	0.179487	-	-	-		-	0
ENSG00000115414	FN1	8.32848e-06	0.00192118		24	39	0.615385	-	-	-		-	1	ESP:TMP_ESP_2_216271043,dbSNP:rs142394008
ENSG00000109323	MANBA	1.00517e-05	0.00219775		7	39	0.179487	-	-	-	T	-	0	dbSNP:rs147023714
ENSG00000205413	SAMD9	1.00878e-05	0.00219775		10	39	0.25641	1.39545	0.0814397	0.0977277		[1052,1052]:2	0
ENSG00000073910	FRY	1.05666e-05	0.00223984		30	39	0.769231	0.614283	0.269514	0.271779		[517,517]:2	0	COSMIC:COSM230273
ENSG00000092148	HECTD1	1.21029e-05	0.0024867		17	39	0.435897	-	-	-		-	0
ENSG00000044524	EPHA3	1.23653e-05	0.0024867		21	39	0.538462	0.893272	0.185856	0.201834		[136,136]:2	0	COSMIC:COSM160806,COSMIC:COSM232256,ESP:TMP_ESP_3_89499296
ENSG00000151240	DIP2C	1.4886e-05	0.00291877		20	39	0.512821	-	-	-		-	0	dbSNP:rs72653030
ENSG00000150457	LATS2	1.64497e-05	0.00314671		10	39	0.25641	-	-	-		-	0	COSMIC:COSM282373,dbSNP:rs55842804
ENSG00000131018	SYNE1	1.7569e-05	0.00328081		30	39	0.769231	-	-	-		-	1	COSMIC:COSM177142,COSMIC:COSM177143,COSMIC:COSM233523,COSMIC:COSM233524,ESP:TMP_ESP_6_152472790,ESP:TMP_ESP_6_152489175,ESP:TMP_ESP_6_152638007,dbSNP:rs145494541,dbSNP:rs190301879,dbSNP:rs200640405,dbSNP:rs201752079
ENSG00000083312	TNPO1	1.81468e-05	0.00330989		6	39	0.153846	-	-	-		-	0
ENSG00000142512	SIGLEC10	1.89229e-05	0.003373		17	39	0.435897	-	-	-		-	0	ESP:TMP_ESP_19_51920686
ENSG00000088808	PPP1R13B	2.21273e-05	0.00385654		8	39	0.205128	-	-	-		-	0
ENSG00000130830	MPP1	2.34368e-05	0.00391095		6	39	0.153846	-	-	-	T	-	0	dbSNP:rs144845406
ENSG00000082258	CCNT2	2.32904e-05	0.00391095		5	39	0.128205	-	-	-	N	-	0	COSMIC:COSM256562
ENSG00000101596	SMCHD1	2.43567e-05	0.00397978		16	39	0.410256	1.39545	0.0814397	0.0977277		[140,140]:2	1
ENSG00000183773	AIFM3	2.79159e-05	0.00429303		17	39	0.435897	-	-	-		-	0
ENSG00000021762	OSBPL5	2.77235e-05	0.00429303		11	39	0.282051	-	-	-	T	-	0	ESP:TMP_ESP_11_3114970,dbSNP:rs151250529
ENSG00000005175	RPAP3	2.75033e-05	0.00429303		8	39	0.205128	3.15308	0.000807776	0.00285098		[549,549]:2	0
ENSG00000118855	MFSD1	3.03527e-05	0.004578		6	39	0.153846	-	-	-	T	-	0	dbSNP:rs147016103
ENSG00000079819	EPB41L2	3.22661e-05	0.0046982		18	39	0.461538	-	-	-		-	0	dbSNP:rs147788951
ENSG00000100412	ACO2	3.23477e-05	0.0046982		10	39	0.25641	-	-	-	T	-	0
ENSG00000136231	IGF2BP3	3.45436e-05	0.00492592		14	39	0.358974	1.59074	0.0558335	0.0724326		[212,212]:2	0	ESP:TMP_ESP_7_23391011
ENSG00000134444	KIAA1468	3.75659e-05	0.0051318		9	39	0.230769	-	-	-		-	0
ENSG00000088827	SIGLEC1	3.6676e-05	0.0051318		21	39	0.538462	-	-	-		-	0	ESP:TMP_ESP_20_3675460
ENSG00000203710	CR1	3.79503e-05	0.0051318		25	39	0.641026	0.736341	0.230762	0.237694		[2169,2169]:2	0	dbSNP:rs144831504
ENSG00000197044	ZNF441	3.93334e-05	0.00522867		9	39	0.230769	2.4626	0.00689672	0.0149118		[31,35]:3	0
ENSG00000100207	TCF20	4.29064e-05	0.00556722		18	39	0.461538	0.809575	0.209092	0.220097		[815,815]:2	0	dbSNP:rs186320252
ENSG00000156976	EIF4A2	4.32998e-05	0.00556722		9	39	0.230769	-	-	-	T	-	0
ENSG00000005700	IBTK	4.71033e-05	0.00595857		8	39	0.205128	-	-	-		-	0	COSMIC:COSM281842
ENSG00000175054	ATR	5.26523e-05	0.00655479		19	39	0.487179	-	-	-		-	1
ENSG00000176387	HSD11B2	5.68241e-05	0.00696361		6	39	0.153846	-	-	-	T	-	0
ENSG00000124942	AHNAK	6.141e-05	0.0073037		23	39	0.589744	-	-	-		-	0	COSMIC:COSM139904,ESP:TMP_ESP_11_62290630,dbSNP:rs117916864,dbSNP:rs150333342
ENSG00000133138	TBC1D8B	6.14617e-05	0.0073037		7	39	0.179487	-	-	-		-	0
ENSG00000183785	TUBA8	6.35851e-05	0.00744325		5	39	0.128205	-	-	-		-	0
ENSG00000038427	VCAN	6.59891e-05	0.00751313		31	39	0.794872	0.313833	0.376824	0.376824		[1929,1929]:2	0	COSMIC:COSM259209,ESP:TMP_ESP_5_82789634,ESP:TMP_ESP_5_82832829,dbSNP:rs140580494,dbSNP:rs146336600,dbSNP:rs149195788,dbSNP:rs150708651,dbSNP:rs201590497
ENSG00000089048	ESF1	6.7078e-05	0.00751313		6	39	0.153846	-	-	-		-	0
ENSG00000185658	BRWD1	6.80138e-05	0.00751313		14	39	0.358974	-	-	-		-	0
ENSG00000009413	REV3L	6.77538e-05	0.00751313		11	39	0.282051	-	-	-		-	0	dbSNP:rs199723843
ENSG00000198837	DENND4B	6.97234e-05	0.00759501		14	39	0.358974	-	-	-		-	0
ENSG00000198947	DMD	7.13322e-05	0.00766382		27	39	0.692308	-	-	-		-	1
ENSG00000129515	SNX6	7.64981e-05	0.00810776		4	39	0.102564	-	-	-	T	-	0
ENSG00000134516	DOCK2	8.6709e-05	0.00906745		30	39	0.769231	0.959518	0.168649	0.184821		[414,415]:3	0	COSMIC:COSM219629,COSMIC:COSM232199,ESP:TMP_ESP_5_169116358,ESP:TMP_ESP_5_169474649,dbSNP:rs146489287,dbSNP:rs150482679,dbSNP:rs200548976
ENSG00000164151	KIAA0947	9.40685e-05	0.00970762		8	39	0.205128	-	-	-		-	0
ENSG00000187391	MAGI2	9.79777e-05	0.00997973		24	39	0.615385	0.809575	0.209092	0.220097		[1066,1066]:2	0	COSMIC:COSM138623,dbSNP:rs149568072
ENSG00000108669	CYTH1	0.000111557	0.0112172		9	39	0.230769	-	-	-	T	-	0	ESP:TMP_ESP_17_76694918
ENSG00000177200	CHD9	0.000116572	0.0115731		21	39	0.538462	-	-	-		-	0
ENSG00000138119	MYOF	0.000120616	0.0118249		14	39	0.358974	-	-	-		-	0
ENSG00000125351	UPF3B	0.000123372	0.0119457		4	39	0.102564	-	-	-	T	-	0	COSMIC:COSM258325
ENSG00000138688	KIAA1109	0.000128863	0.0123253		24	39	0.615385	-	-	-		-	1
ENSG00000197969	VPS13A	0.000134522	0.0127115		25	39	0.641026	-	-	-		-	0	ESP:TMP_ESP_9_79952416
ENSG00000138646	HERC5	0.000136857	0.0127664		12	39	0.307692	-	-	-		-	0	COSMIC:COSM225196,ESP:TMP_ESP_4_89410346
ENSG00000139278	GLIPR1	0.000138358	0.0127664		6	39	0.153846	-	-	-	T	-	0
ENSG00000054277	OPN3	0.000140272	0.0127925		13	39	0.333333	-	-	-	T	-	0	ESP:TMP_ESP_1_241842850
ENSG00000173821	RNF213	0.00014834	0.0131525		17	39	0.435897	-	-	-		-	0	ESP:TMP_ESP_17_78317623,dbSNP:rs146798784
ENSG00000066455	GOLGA5	0.00014925	0.0131525		7	39	0.179487	-	-	-	T	-	0
ENSG00000085733	CTTN	0.000147661	0.0131525		5	39	0.128205	-	-	-	T	-	0
ENSG00000183023	SLC8A1	0.000162029	0.0141199		16	39	0.410256	-	-	-		-	0
ENSG00000182504	CEP97	0.000167769	0.0143023		6	39	0.153846	-	-	-	T	-	0
ENSG00000148308	GTF3C5	0.00016712	0.0143023		10	39	0.25641	-	-	-		-	0
ENSG00000133657	ATP13A3	0.000169989	0.0143357		12	39	0.307692	1.83486	0.0332632	0.0498948		[847,847]:2	0
ENSG00000064012	CASP8	0.000176437	0.0147212		14	39	0.358974	-	-	-		-	1	COSMIC:COSM159759
ENSG00000068097	HEATR6	0.000187905	0.0155131		14	39	0.358974	-	-	-		-	0	dbSNP:rs143976554
ENSG00000181031	RPH3AL	0.00020701	0.016354		9	39	0.230769	-	-	-		-	0
ENSG00000116539	ASH1L	0.000210602	0.016354		11	39	0.282051	-	-	-		-	1	COSMIC:COSM170344,COSMIC:COSM206743
ENSG00000048707	VPS13D	0.000205634	0.016354		21	39	0.538462	-	-	-		-	0	COSMIC:COSM278097,ESP:TMP_ESP_1_12331158,dbSNP:rs143505339,dbSNP:rs200361851
ENSG00000163328	GPR155	0.000208031	0.016354		7	39	0.179487	-	-	-	N	-	0	ESP:TMP_ESP_2_175337850
ENSG00000188906	LRRK2	0.000200381	0.016354		27	39	0.692308	-	-	-		-	1	COSMIC:COSM84149,COSMIC:COSM84150,dbSNP:rs199610116,dbSNP:rs200521995,dbSNP:rs79805220,dbSNP:rs80002288
ENSG00000001561	ENPP4	0.000209162	0.016354		5	39	0.128205	-	-	-		-	0	COSMIC:COSM70610
ENSG00000121691	CAT	0.000215049	0.0165356		5	39	0.128205	-	-	-	T	-	0
ENSG00000140332	TLE3	0.000221274	0.016849		14	39	0.358974	-	-	-		-	0	ESP:TMP_ESP_15_70353076
ENSG00000107611	CUBN	0.00022587	0.0168714		28	39	0.717949	-	-	-		-	0	COSMIC:COSM243914,ESP:TMP_ESP_10_16870840,ESP:TMP_ESP_10_16882869,ESP:TMP_ESP_10_16960672,ESP:TMP_ESP_10_17130145,ESP:TMP_ESP_10_17155980,dbSNP:rs139454937,dbSNP:rs139724058,dbSNP:rs145661638
ENSG00000163359	COL6A3	0.000225613	0.0168714		28	39	0.717949	-	-	-		-	0	COSMIC:COSM210534,COSMIC:COSM232074,ESP:TMP_ESP_2_238249576,ESP:TMP_ESP_2_238267217,dbSNP:rs113538665,dbSNP:rs149620525,dbSNP:rs200795795
ENSG00000076248	UNG	0.000238489	0.0176459		6	39	0.153846	-	-	-	T	-	0
ENSG00000148337	CIZ1	0.000245125	0.0178011		10	39	0.25641	-	-	-	T	-	0
ENSG00000104972	LILRB1	0.000243115	0.0178011		29	39	0.74359	-	-	-		-	0	ESP:TMP_ESP_19_55085351,ESP:TMP_ESP_19_55085883,ESP:TMP_ESP_19_55143633,dbSNP:rs143437645,dbSNP:rs145835913,dbSNP:rs145854955,dbSNP:rs200284559,dbSNP:rs202036981
ENSG00000138439	FAM117B	0.000256608	0.018464		7	39	0.179487	-	-	-		-	0
ENSG00000123179	EBPL	0.000260481	0.0185723		6	39	0.153846	-	-	-	T	-	0
ENSG00000067141	NEO1	0.000263132	0.0185923		15	39	0.384615	-	-	-		-	0	dbSNP:rs141602999
ENSG00000143344	RGL1	0.000278019	0.0192965		11	39	0.282051	-	-	-		-	0
ENSG00000065559	MAP2K4	0.00027697	0.0192965		5	39	0.128205	-	-	-	T	-	1
ENSG00000162909	CAPN2	0.000281239	0.0193488		12	39	0.307692	-	-	-		-	0	dbSNP:rs2404355
ENSG00000205339	IPO7	0.000289194	0.019723		5	39	0.128205	-	-	-	T	-	0
ENSG00000169710	FASN	0.000299105	0.0200502		19	39	0.487179	-	-	-		-	0	dbSNP:rs191483572,dbSNP:rs200574684,dbSNP:rs200668722
ENSG00000133703	KRAS	0.000298356	0.0200502		3	39	0.0769231	-	-	-	T	-	1	COSMIC:COSM87290
ENSG00000107669	ATE1	0.000302838	0.0201285		10	39	0.25641	-	-	-	T	-	0
ENSG00000161057	PSMC2	0.000308942	0.0203616		7	39	0.179487	-	-	-	T	-	0
ENSG00000109189	USP46	0.000314491	0.0205546		4	39	0.102564	-	-	-	T	-	0
ENSG00000155903	RASA2	0.000323727	0.0208114		9	39	0.230769	-	-	-	T	-	0
ENSG00000118689	FOXO3	0.000322204	0.0208114		3	39	0.0769231	-	-	-	T	-	0
ENSG00000095059	DHPS	0.000341776	0.021211		7	39	0.179487	-	-	-	T	-	0
ENSG00000101605	MYOM1	0.000338298	0.021211		19	39	0.487179	-	-	-		-	0	ESP:TMP_ESP_18_3067504,ESP:TMP_ESP_18_3071885,ESP:TMP_ESP_18_3134759,ESP:TMP_ESP_18_3164323,ESP:TMP_ESP_18_3164386,ESP:TMP_ESP_18_3164419,dbSNP:rs7229433
ENSG00000160145	KALRN	0.00034511	0.021211		30	39	0.769231	-	-	-		-	0	COSMIC:COSM106646,ESP:TMP_ESP_3_124017591,dbSNP:rs139050770,dbSNP:rs145439072,dbSNP:rs200699474
ENSG00000109762	SNX25	0.0003433	0.021211		13	39	0.333333	-	-	-		-	0	dbSNP:rs142456923,dbSNP:rs148386674
ENSG00000144857	BOC	0.000346169	0.021211		7	39	0.179487	-	-	-		-	0	ESP:TMP_ESP_3_112992061
ENSG00000184613	NELL2	0.000334005	0.021211		16	39	0.410256	-	-	-		-	1
ENSG00000135108	FBXO21	0.000353682	0.0212607		8	39	0.205128	-	-	-	T	-	0
ENSG00000115828	QPCT	0.00035696	0.0212607		11	39	0.282051	-	-	-		-	0	ESP:TMP_ESP_2_37586840
ENSG00000179532	DNHD1	0.000357171	0.0212607		17	39	0.435897	-	-	-		-	0
ENSG00000075275	CELSR1	0.000357824	0.0212607		19	39	0.487179	-	-	-		-	0	dbSNP:rs56207834
ENSG00000080839	RBL1	0.000384666	0.0225144		11	39	0.282051	-	-	-	T	-	0
ENSG00000136731	UGGT1	0.000382918	0.0225144		18	39	0.461538	-	-	-		-	0	dbSNP:rs139800360,dbSNP:rs183821104,dbSNP:rs199802848,dbSNP:rs73955970
ENSG00000079435	LIPE	0.000390987	0.0225479		3	39	0.0769231	-	-	-	T	-	0
ENSG00000111653	ING4	0.000388734	0.0225479		8	39	0.205128	-	-	-	T	-	0
ENSG00000162851	TFB2M	0.000398794	0.0228303		5	39	0.128205	-	-	-	T	-	0
ENSG00000188997	KCTD21	0.000430896	0.0238675		2	39	0.0512821	-	-	-	T	-	0
ENSG00000115816	CEBPZ	0.000436082	0.0238675		10	39	0.25641	-	-	-	T	-	0
ENSG00000103423	DNAJA3	0.000421466	0.0238675		10	39	0.25641	-	-	-	N	-	0	COSMIC:COSM178935
ENSG00000162775	RBM15	0.000438214	0.0238675		10	39	0.25641	-	-	-		-	0
ENSG00000145781	COMMD10	0.000433572	0.0238675		4	39	0.102564	-	-	-	T	-	0
ENSG00000138032	PPM1B	0.000430896	0.0238675		2	39	0.0512821	-	-	-	T	-	0
ENSG00000100294	MCAT	0.000425366	0.0238675		4	39	0.102564	-	-	-	T	-	0	ESP:TMP_ESP_22_43529252
ENSG00000164172	MOCS2	0.000444915	0.0239005		2	39	0.0512821	-	-	-	T	-	0
ENSG00000136153	LMO7	0.000442119	0.0239005		17	39	0.435897	-	-	-		-	0	COSMIC:COSM275869,COSMIC:COSM275870,ESP:TMP_ESP_13_76393554
ENSG00000182903	ZNF721	0.000455044	0.0242783		10	39	0.25641	-	-	-		-	0
ENSG00000174775	HRAS	0.000480973	0.0254883		10	39	0.25641	6.29559	1.53112e-10	3.67469e-08		[12,13]:3,[58,61]:4	1	COSMIC:COSM123649,COSMIC:COSM480,COSMIC:COSM490,COSMIC:COSM496,COSMIC:COSM498,COSMIC:COSM99664,ESP:TMP_ESP_11_533436,dbSNP:rs121917758,dbSNP:rs28933406
ENSG00000144455	SUMF1	0.000488994	0.0257395		12	39	0.307692	-	-	-		-	0
ENSG00000175470	PPP2R2D	0.000522592	0.0273246		5	39	0.128205	-	-	-	T	-	0
ENSG00000101361	NOP56	0.000556349	0.028897		7	39	0.179487	-	-	-	T	-	0
ENSG00000144554	FANCD2	0.000567059	0.0292595		15	39	0.384615	-	-	-		-	0
ENSG00000130635	COL5A1	0.000575189	0.029485		23	39	0.589744	-	-	-		-	0	ESP:TMP_ESP_9_137591795,ESP:TMP_ESP_9_137721973,dbSNP:rs45579636,dbSNP:rs61736827
ENSG00000105926	MPP6	0.000625441	0.0318528		8	39	0.205128	-	-	-	T	-	0
ENSG00000112796	ENPP5	0.00063433	0.0320971		7	39	0.179487	-	-	-		-	0	dbSNP:rs140311004
ENSG00000112367	FIG4	0.000659219	0.0331426		16	39	0.410256	-	-	-		-	0	dbSNP:rs200970494
ENSG00000170606	HSPA4	0.000666854	0.033313		5	39	0.128205	-	-	-	T	-	0
ENSG00000137198	GMPR	0.000673876	0.0334507		8	39	0.205128	-	-	-	T	-	0	dbSNP:rs146267686
ENSG00000164867	NOS3	0.000682468	0.0336346		21	39	0.538462	-	-	-		-	0	dbSNP:rs140510569,dbSNP:rs41508746
ENSG00000172915	NBEA	0.000686157	0.0336346		33	39	0.846154	-	-	-		-	0	ESP:TMP_ESP_13_35731187,ESP:TMP_ESP_13_36049190,ESP:TMP_ESP_13_36049618,dbSNP:rs199826709
ENSG00000080493	SLC4A4	0.000691383	0.0336802		22	39	0.564103	1.10251	0.135119	0.150831		[339,339]:2	0	ESP:TMP_ESP_4_72215825
ENSG00000115525	ST3GAL5	0.00071102	0.034423		4	39	0.102564	-	-	-	T	-	0
ENSG00000154358	OBSCN	0.000730497	0.0349875		33	39	0.846154	-	-	-		-	1	ESP:TMP_ESP_1_228466864,ESP:TMP_ESP_1_228495060,ESP:TMP_ESP_1_228525016,dbSNP:rs199507775
ENSG00000221926	TRIM16	0.000731602	0.0349875		6	39	0.153846	-	-	-	T	-	0	dbSNP:rs146156927
ENSG00000197959	DNM3	0.000746175	0.0352787		12	39	0.307692	-	-	-		-	0
ENSG00000112297	AIM1	0.000746686	0.0352787		9	39	0.230769	-	-	-		-	0
ENSG00000048392	RRM2B	0.000756251	0.0355166		5	39	0.128205	-	-	-	T	-	0
ENSG00000213079	SCAF8	0.000761674	0.0355584		10	39	0.25641	-	-	-		-	0
ENSG00000154262	ABCA6	0.000778064	0.0361086		19	39	0.487179	-	-	-		-	0	dbSNP:rs142271849
ENSG00000115677	HDLBP	0.000791623	0.0365217		14	39	0.358974	-	-	-		-	0
ENSG00000198825	INPP5F	0.000798016	0.0366014		6	39	0.153846	-	-	-	T	-	0
ENSG00000115053	NCL	0.000819424	0.0369353		7	39	0.179487	-	-	-		-	0	dbSNP:rs11542687
ENSG00000047410	TPR	0.000816075	0.0369353		17	39	0.435897	-	-	-		-	0	COSMIC:COSM208973,ESP:TMP_ESP_1_186315386
ENSG00000106367	AP1S1	0.000812641	0.0369353		6	39	0.153846	-	-	-	T	-	0
ENSG00000197275	RAD54B	0.000844541	0.0378499		10	39	0.25641	-	-	-		-	0
ENSG00000167202	TBC1D2B	0.000883646	0.0393775		12	39	0.307692	-	-	-		-	0
ENSG00000125945	ZNF436	0.000908719	0.040266		8	39	0.205128	-	-	-	T	-	0	ESP:TMP_ESP_1_23688539
ENSG00000137877	SPTBN5	0.000914469	0.0402931		28	39	0.717949	-	-	-		-	0	ESP:TMP_ESP_15_42185588,dbSNP:rs139696266,dbSNP:rs150167204
ENSG00000140563	MCTP2	0.000920364	0.0403263		14	39	0.358974	-	-	-		-	0	dbSNP:rs140817032,dbSNP:rs200511099,dbSNP:rs201964545
ENSG00000147364	FBXO25	0.000930684	0.0403279		6	39	0.153846	-	-	-	T	-	0
ENSG00000108406	DHX40	0.000928406	0.0403279		6	39	0.153846	-	-	-	T	-	0	dbSNP:rs200066612
ENSG00000004487	KDM1A	0.000953988	0.0411106		9	39	0.230769	-	-	-	T	-	0
ENSG00000189079	ARID2	0.000973527	0.0417233		9	39	0.230769	-	-	-		-	1
ENSG00000187210	GCNT1	0.000991274	0.042253		20	39	0.512821	1.46869	0.0709579	0.0910689		[328,330]:3	0	COSMIC:COSM244680,ESP:TMP_ESP_9_79117571
ENSG00000113721	PDGFRB	0.00101149	0.0428818		18	39	0.461538	-	-	-		-	0	ESP:TMP_ESP_5_149511596
ENSG00000184009	ACTG1	0.00101845	0.0429448		3	39	0.0769231	-	-	-	T	-	1	ESP:TMP_ESP_17_79478341
ENSG00000058091	CDK14	0.00104345	0.0436294		10	39	0.25641	-	-	-		-	0	dbSNP:rs202149959
ENSG00000144843	ADPRH	0.00104582	0.0436294		5	39	0.128205	-	-	-	T	-	0
ENSG00000122025	FLT3	0.00108248	0.043989		20	39	0.512821	1.39545	0.0814397	0.0977277		[878,878]:2	1	dbSNP:rs201721806
ENSG00000076242	MLH1	0.00106956	0.043989		15	39	0.384615	-	-	-	N	-	0	dbSNP:rs200140536
ENSG00000110002	VWA5A	0.00107729	0.043989		13	39	0.333333	-	-	-		-	0	COSMIC:COSM212321,dbSNP:rs201601409
ENSG00000109674	NEIL3	0.00106556	0.043989		6	39	0.153846	-	-	-	T	-	0
ENSG00000133026	MYH10	0.0010796	0.043989		16	39	0.410256	-	-	-		-	0
ENSG00000095637	SORBS1	0.00108903	0.0440271		21	39	0.538462	-	-	-		-	0	ESP:TMP_ESP_10_97170542,dbSNP:rs139885781
ENSG00000198924	DCLRE1A	0.00112085	0.0448511		8	39	0.205128	-	-	-	N	-	0	dbSNP:rs199698413
ENSG00000204262	COL5A2	0.00111681	0.0448511		18	39	0.461538	-	-	-		-	0
ENSG00000169641	LUZP1	0.00112768	0.0448956		9	39	0.230769	-	-	-		-	0	ESP:TMP_ESP_1_23420682
ENSG00000150867	PIP4K2A	0.00120376	0.0476822		8	39	0.205128	-	-	-	T	-	0
ENSG00000184635	ZNF93	0.00124308	0.0489924		5	39	0.128205	-	-	-	T	-	0
ENSG00000141564	RPTOR	0.0012744	0.0499756		14	39	0.358974	-	-	-		-	0	dbSNP:rs138692722
ENSG00000126581	BECN1	0.00129612	0.0502474		10	39	0.25641	-	-	-	T	-	0
ENSG00000198001	IRAK4	0.00130055	0.0502474		6	39	0.153846	-	-	-	T	-	0
ENSG00000185811	IKZF1	0.00129414	0.0502474		15	39	0.384615	3.54367	0.0001973	0.00285098		[115,115]:2,[436,436]:2	0
ENSG00000112972	HMGCS1	0.00132586	0.0509742		4	39	0.102564	-	-	-	T	-	0	COSMIC:COSM216720
ENSG00000153147	SMARCA5	0.00133635	0.0510228		7	39	0.179487	-	-	-	T	-	0
ENSG00000137801	THBS1	0.00134014	0.0510228		18	39	0.461538	-	-	-		-	0	COSMIC:COSM267571,dbSNP:rs140265683
ENSG00000213799	ZNF845	0.00138464	0.0524623		9	39	0.230769	-	-	-		-	0
ENSG00000125630	POLR1B	0.00140665	0.0530401		7	39	0.179487	-	-	-	T	-	0
ENSG00000165617	DACT1	0.00143541	0.0538656		12	39	0.307692	-	-	-		-	0
ENSG00000165521	EML5	0.00147368	0.0542819		21	39	0.538462	-	-	-		-	0	dbSNP:rs149177501,dbSNP:rs186518662,dbSNP:rs201647289
ENSG00000158517	NCF1	0.00145567	0.0542819		6	39	0.153846	-	-	-	T	-	0
ENSG00000088538	DOCK3	0.00148754	0.0542819		20	39	0.512821	-	-	-		-	0	dbSNP:rs185430293
ENSG00000153922	CHD1	0.00149787	0.0542819		12	39	0.307692	-	-	-		-	0
ENSG00000143486	EIF2D	0.00150059	0.0542819		7	39	0.179487	-	-	-	T	-	0
ENSG00000162889	MAPKAPK2	0.00150187	0.0542819		3	39	0.0769231	-	-	-	T	-	0
ENSG00000087095	NLK	0.00150059	0.0542819		5	39	0.128205	-	-	-	T	-	0
ENSG00000082438	COBLL1	0.00148183	0.0542819		11	39	0.282051	-	-	-		-	0
ENSG00000196247	ZNF107	0.00152591	0.0545013		5	39	0.128205	-	-	-		-	0
ENSG00000131375	CAPN7	0.00151759	0.0545013		5	39	0.128205	-	-	-	T	-	0	dbSNP:rs142674245
ENSG00000171603	CLSTN1	0.00152879	0.0545013		14	39	0.358974	-	-	-	N	-	0	ESP:TMP_ESP_1_9801133
ENSG00000167977	KCTD5	0.0015516	0.0549076		9	39	0.230769	-	-	-	T	-	0
ENSG00000213341	CHUK	0.00155419	0.0549076		8	39	0.205128	-	-	-	T	-	0
ENSG00000198700	IPO9	0.00159249	0.0557586		16	39	0.410256	-	-	-		-	0	dbSNP:rs149435747
ENSG00000085662	AKR1B1	0.00159129	0.0557586		7	39	0.179487	-	-	-		-	0
ENSG00000128245	YWHAH	0.00164441	0.0562745		2	39	0.0512821	-	-	-	T	-	0
ENSG00000114841	DNAH1	0.00161751	0.0562745		24	39	0.615385	-	-	-		-	0	ESP:TMP_ESP_3_52386063,ESP:TMP_ESP_3_52409381,dbSNP:rs193136249
ENSG00000154864	PIEZO2	0.00163688	0.0562745		13	39	0.333333	-	-	-		-	0
ENSG00000081760	AACS	0.00162174	0.0562745		10	39	0.25641	-	-	-	N	-	0
ENSG00000068305	MEF2A	0.00165028	0.0562745		5	39	0.128205	-	-	-	T	-	0	COSMIC:COSM215596,COSMIC:COSM215597,dbSNP:rs201205600
ENSG00000122779	TRIM24	0.00163278	0.0562745		8	39	0.205128	-	-	-	T	-	0
ENSG00000151502	VPS26B	0.00173356	0.0588583		6	39	0.153846	-	-	-	T	-	0	dbSNP:rs147345168
ENSG00000067798	NAV3	0.00175695	0.0593544		23	39	0.589744	-	-	-		-	1	ESP:TMP_ESP_12_78574693,ESP:TMP_ESP_12_78582170
ENSG00000150961	SEC24D	0.0017633	0.0593544		3	39	0.0769231	-	-	-	T	-	0	ESP:TMP_ESP_4_119727033
ENSG00000152439	ZNF773	0.00179734	0.0602416		5	39	0.128205	-	-	-	T	-	0
ENSG00000148498	PARD3	0.00180992	0.0604051		15	39	0.384615	-	-	-		-	0	dbSNP:rs115076370,dbSNP:rs147747008
ENSG00000173818	ENDOV	0.00182	0.0604843		9	39	0.230769	-	-	-	T	-	0	dbSNP:rs112209988
ENSG00000147650	LRP12	0.00183523	0.0607328		11	39	0.282051	2.14872	0.0158282	0.028349		[756,756]:2	0
ENSG00000127947	PTPN12	0.00184387	0.0607625		7	39	0.179487	-	-	-	T	-	0
ENSG00000167676	PLIN4	0.00185604	0.0609075		14	39	0.358974	-	-	-		-	0	ESP:TMP_ESP_19_4512087,ESP:TMP_ESP_19_4512688
ENSG00000131373	HACL1	0.00188046	0.0614518		4	39	0.102564	-	-	-	T	-	0
ENSG00000179364	PACS2	0.00189995	0.0618313		13	39	0.333333	-	-	-		-	0	ESP:TMP_ESP_14_105856268
ENSG00000170004	CHD3	0.00197494	0.0636225		18	39	0.461538	-	-	-		-	1	dbSNP:rs201793105
ENSG00000162654	GBP4	0.00197001	0.0636225		9	39	0.230769	-	-	-		-	0
ENSG00000142235	LMTK3	0.00198744	0.0636225		14	39	0.358974	-	-	-		-	0	ESP:TMP_ESP_19_49005640
ENSG00000182866	LCK	0.00198742	0.0636225		16	39	0.410256	-	-	-		-	0
ENSG00000137944	CCBL2	0.00200248	0.0638432		6	39	0.153846	-	-	-	T	-	0
ENSG00000049246	PER3	0.00202628	0.0643405		10	39	0.25641	-	-	-		-	0
ENSG00000092140	G2E3	0.00208094	0.0658098		7	39	0.179487	-	-	-	T	-	0
ENSG00000101346	POFUT1	0.00213809	0.0673455		3	39	0.0769231	-	-	-	T	-	0
ENSG00000197857	ZNF44	0.00216219	0.0674436		6	39	0.153846	-	-	-	T	-	0
ENSG00000058056	USP13	0.00215048	0.0674436		12	39	0.307692	-	-	-		-	0
ENSG00000135945	REV1	0.002167	0.0674436		5	39	0.128205	-	-	-	T	-	0	COSMIC:COSM171107
ENSG00000131323	TRAF3	0.00221589	0.0686927		7	39	0.179487	-	-	-		-	0
ENSG00000139436	GIT2	0.00222539	0.0687154		7	39	0.179487	-	-	-	T	-	0
ENSG00000196704	AMZ2	0.00228849	0.0703868		6	39	0.153846	-	-	-	T	-	0
ENSG00000206190	ATP10A	0.0024219	0.0740501		27	39	0.692308	0.671722	0.25088	0.255133		[720,720]:2	0	COSMIC:COSM138954,COSMIC:COSM183433,ESP:TMP_ESP_15_25928533,ESP:TMP_ESP_15_25959007,dbSNP:rs149560828,dbSNP:rs200358485
ENSG00000196391	ZNF774	0.00242648	0.0740501		5	39	0.128205	-	-	-	T	-	0
ENSG00000086758	HUWE1	0.0024443	0.0743049		16	39	0.410256	-	-	-		-	0	dbSNP:rs11795818,dbSNP:rs187801816,dbSNP:rs7064041
ENSG00000166226	CCT2	0.00246121	0.0745301		8	39	0.205128	-	-	-	T	-	0
ENSG00000168300	PCMTD1	0.00251632	0.0759057		4	39	0.102564	-	-	-	T	-	0
ENSG00000198730	CTR9	0.00254189	0.0763832		10	39	0.25641	-	-	-	T	-	0
ENSG00000104731	KLHDC4	0.00259124	0.0766909		13	39	0.333333	1.59074	0.0558335	0.0724326		[300,300]:2	0	ESP:TMP_ESP_16_87741928,dbSNP:rs189243168
ENSG00000104450	SPAG1	0.00257734	0.0766909		6	39	0.153846	-	-	-	T	-	0
ENSG00000171720	HDAC3	0.00258575	0.0766909		12	39	0.307692	-	-	-	T	-	0	ESP:TMP_ESP_5_141016264
ENSG00000119669	IRF2BPL	0.0025671	0.0766909		8	39	0.205128	-	-	-	T	-	0
ENSG00000163539	CLASP2	0.00261967	0.0769516		10	39	0.25641	-	-	-		-	0	ESP:TMP_ESP_3_33623314
ENSG00000028116	VRK2	0.00261955	0.0769516		6	39	0.153846	-	-	-	T	-	0
ENSG00000178385	PLEKHM3	0.00271335	0.0791108		6	39	0.153846	-	-	-	T	-	0	dbSNP:rs116411863
ENSG00000119787	ATL2	0.00270914	0.0791108		7	39	0.179487	-	-	-	T	-	0
ENSG00000143369	ECM1	0.00274183	0.0796451		9	39	0.230769	-	-	-	T	-	0
ENSG00000082269	FAM135A	0.00275478	0.0797259		15	39	0.384615	-	-	-		-	0
ENSG00000069424	KCNAB2	0.00279721	0.0806564		16	39	0.410256	-	-	-	T	-	0
ENSG00000106772	PRUNE2	0.00282835	0.0812554		25	39	0.641026	-	-	-		-	0
ENSG00000139687	RB1	0.00290945	0.0832803		10	39	0.25641	-	-	-		-	1	COSMIC:COSM13142
ENSG00000112394	SLC16A10	0.0029257	0.0834409		5	39	0.128205	-	-	-	T	-	0
ENSG00000134684	YARS	0.00293789	0.0834851		8	39	0.205128	-	-	-	T	-	0	dbSNP:rs201507589
ENSG00000163346	PBXIP1	0.00300194	0.0849971		13	39	0.333333	-	-	-		-	0
ENSG00000135597	REPS1	0.00303854	0.0854881		9	39	0.230769	-	-	-	T	-	0
ENSG00000128512	DOCK4	0.00304108	0.0854881		23	39	0.589744	0.809575	0.209092	0.220097		[1360,1360]:2	0	COSMIC:COSM227044,ESP:TMP_ESP_7_111400268,dbSNP:rs200903684
ENSG00000104325	DECR1	0.00306579	0.0858749		5	39	0.128205	-	-	-	T	-	0
ENSG00000159593	NAE1	0.00312503	0.0872227		20	39	0.512821	-	-	-	T	-	0
ENSG00000113810	SMC4	0.00314602	0.0874973		11	39	0.282051	-	-	-	T	-	0
ENSG00000172456	FGGY	0.00321733	0.0891644		6	39	0.153846	-	-	-	T	-	0
ENSG00000147130	ZMYM3	0.00323318	0.089288		7	39	0.179487	-	-	-	T	-	0
ENSG00000196757	ZNF700	0.00339395	0.0930726		4	39	0.102564	-	-	-	T	-	0
ENSG00000163913	IFT122	0.00338904	0.0930726		16	39	0.410256	-	-	-		-	0	ESP:TMP_ESP_3_129195678
ENSG00000133059	DSTYK	0.00350032	0.0955853		6	39	0.153846	-	-	-		-	0
ENSG00000176658	MYO1D	0.00350996	0.0955853		10	39	0.25641	-	-	-	T	-	1
ENSG00000152582	SPEF2	0.0035583	0.0965667		21	39	0.538462	-	-	-		-	0	dbSNP:rs200831191
ENSG00000215915	ATAD3C	0.00359361	0.0971886		11	39	0.282051	-	-	-	T	-	0
ENSG00000132640	BTBD3	0.00369491	0.0995848		4	39	0.102564	-	-	-	T	-	0
ENSG00000182197	EXT1	0.00371149	0.099689		7	39	0.179487	-	-	-	T	-	0
ENSG00000163661	PTX3	0.00376653	0.100822		5	39	0.128205	-	-	-	T	-	0	dbSNP:rs144979346
ENSG00000066336	SPI1	0.00378768	0.101044		11	39	0.282051	-	-	-	T	-	0	ESP:TMP_ESP_11_47372812,dbSNP:rs185449721
ENSG00000122678	POLM	0.0038496	0.102347		11	39	0.282051	2.14872	0.0158282	0.028349		[91,91]:2	0
ENSG00000174705	SH3PXD2B	0.00390185	0.103386		11	39	0.282051	-	-	-		-	0
ENSG00000167315	ACAA2	0.00398242	0.104114		5	39	0.128205	-	-	-	T	-	0
ENSG00000159082	SYNJ1	0.00398105	0.104114		16	39	0.410256	1.83486	0.0332632	0.0498948		[328,328]:2	0	COSMIC:COSM185797
ENSG00000142173	COL6A2	0.00396062	0.104114		23	39	0.589744	-	-	-		-	0	ESP:TMP_ESP_21_47540961,ESP:TMP_ESP_21_47546042,dbSNP:rs144117982,dbSNP:rs200501842,dbSNP:rs200667230
ENSG00000158467	AHCYL2	0.00396307	0.104114		10	39	0.25641	-	-	-		-	0
ENSG00000130779	CLIP1	0.00404221	0.105326		18	39	0.461538	-	-	-		-	0	COSMIC:COSM226284
ENSG00000087303	NID2	0.00405632	0.105343		18	39	0.461538	-	-	-		-	0
ENSG00000135540	NHSL1	0.00409738	0.106059		10	39	0.25641	-	-	-		-	0
ENSG00000105559	PLEKHA4	0.00411411	0.106141		17	39	0.435897	-	-	-		-	0	dbSNP:rs138081139
ENSG00000142784	WDTC1	0.00417905	0.107463		12	39	0.307692	-	-	-	T	-	0	dbSNP:rs199745928
ENSG00000110077	MS4A6A	0.0042325	0.108482		6	39	0.153846	-	-	-		-	0
ENSG00000141027	NCOR1	0.00425483	0.108699		14	39	0.358974	-	-	-		-	1	ESP:TMP_ESP_17_16068460,dbSNP:rs148052050
ENSG00000171566	PLRG1	0.00426942	0.108718		7	39	0.179487	-	-	-	T	-	0
ENSG00000064651	SLC12A2	0.00428489	0.108759		12	39	0.307692	-	-	-	N	-	0
ENSG00000085832	EPS15	0.00429917	0.108769		6	39	0.153846	-	-	-	T	-	0	ESP:TMP_ESP_1_51864855
ENSG00000186417	GLDN	0.00432508	0.109073		9	39	0.230769	-	-	-		-	0
ENSG00000111581	NUP107	0.00440994	0.110856		10	39	0.25641	-	-	-	T	-	0	dbSNP:rs143129957
ENSG00000160111	CPAMD8	0.00443339	0.11109		27	39	0.692308	-	-	-		-	0	ESP:TMP_ESP_19_17122386,dbSNP:rs148763317,dbSNP:rs200291166
ENSG00000172340	SUCLG2	0.00446069	0.111418		5	39	0.128205	-	-	-	T	-	0
ENSG00000099953	MMP11	0.00449436	0.111902		15	39	0.384615	-	-	-		-	0
ENSG00000156239	N6AMT1	0.00455852	0.113141		3	39	0.0769231	-	-	-	T	-	0
ENSG00000145012	LPP	0.0046151	0.114184		8	39	0.205128	-	-	-		-	0
ENSG00000185880	TRIM69	0.00470606	0.115704		7	39	0.179487	-	-	-	T	-	0
ENSG00000161203	AP2M1	0.00470217	0.115704		13	39	0.333333	-	-	-	T	-	0
ENSG00000063177	RPL18	0.00476451	0.116775		8	39	0.205128	-	-	-	T	-	0	ESP:TMP_ESP_19_49120642,dbSNP:rs200472012
ENSG00000172660	TAF15	0.00478477	0.116906		10	39	0.25641	-	-	-	T	-	0	ESP:TMP_ESP_17_34149870
ENSG00000116120	FARSB	0.00480135	0.116947		8	39	0.205128	-	-	-	T	-	0	dbSNP:rs17851564
ENSG00000105618	PRPF31	0.00486289	0.118079		8	39	0.205128	-	-	-	T	-	0	ESP:TMP_ESP_19_54631768
ENSG00000146918	NCAPG2	0.00489853	0.118578		10	39	0.25641	-	-	-		-	0
ENSG00000140525	FANCI	0.00492154	0.118768		14	39	0.358974	-	-	-	T	-	0
ENSG00000100916	BRMS1L	0.00500822	0.120489		5	39	0.128205	-	-	-	T	-	0
ENSG00000145715	RASA1	0.00504431	0.120638		8	39	0.205128	-	-	-	N	-	0
ENSG00000169762	TAPT1	0.00504518	0.120638		4	39	0.102564	-	-	-	T	-	0
ENSG00000127603	MACF1	0.00515145	0.122805		28	39	0.717949	-	-	-		-	1	dbSNP:rs148845550,dbSNP:rs200477353
ENSG00000132463	GRSF1	0.00520999	0.123824		7	39	0.179487	-	-	-	T	-	0
ENSG00000137601	NEK1	0.00524742	0.123962		13	39	0.333333	-	-	-		-	0	ESP:TMP_ESP_4_170384477,dbSNP:rs199678116
ENSG00000150990	DHX37	0.00523605	0.123962		15	39	0.384615	-	-	-		-	0	ESP:TMP_ESP_12_125432717
ENSG00000136960	ENPP2	0.00531128	0.125094		22	39	0.564103	1.23567	0.108291	0.126164		[220,220]:2	0	ESP:TMP_ESP_8_120608279,dbSNP:rs145281531
ENSG00000197054	ZNF763	0.00535665	0.125785		10	39	0.25641	3.15308	0.000807776	0.00285098		[178,178]:2	0
ENSG00000119760	SUPT7L	0.00541343	0.126739		6	39	0.153846	-	-	-	T	-	0
ENSG00000106804	C5	0.00543494	0.126864		16	39	0.410256	-	-	-		-	0	dbSNP:rs142075999
ENSG00000108510	MED13	0.00555153	0.128074		13	39	0.333333	-	-	-		-	0	ESP:TMP_ESP_17_60106984
ENSG00000174306	ZHX3	0.0055671	0.128074		9	39	0.230769	-	-	-		-	0
ENSG00000179912	R3HDM2	0.00553219	0.128074		15	39	0.384615	-	-	-		-	0
ENSG00000160392	C19orf47	0.00556845	0.128074		4	39	0.102564	-	-	-	T	-	0
ENSG00000101162	TUBB1	0.00552278	0.128074		6	39	0.153846	-	-	-	T	-	0
ENSG00000134013	LOXL2	0.00558808	0.12815		12	39	0.307692	-	-	-		-	0	dbSNP:rs201211677
ENSG00000104517	UBR5	0.00561991	0.128429		20	39	0.512821	-	-	-		-	0
ENSG00000107242	PIP5K1B	0.00563297	0.128429		22	39	0.564103	-	-	-		-	0	COSMIC:COSM138715,COSMIC:COSM170999,ESP:TMP_ESP_9_71534385,ESP:TMP_ESP_9_71628704
ENSG00000153015	CWC27	0.00574686	0.128964		8	39	0.205128	-	-	-	T	-	0
ENSG00000174780	SRP72	0.00577205	0.128964		5	39	0.128205	-	-	-	T	-	0
ENSG00000008952	SEC62	0.005788	0.128964		4	39	0.102564	-	-	-	T	-	0
ENSG00000070882	OSBPL3	0.0057622	0.128964		11	39	0.282051	-	-	-		-	0
ENSG00000075702	WDR62	0.0057376	0.128964		7	39	0.179487	-	-	-	T	-	0	dbSNP:rs199730336
ENSG00000164338	UTP15	0.00574789	0.128964		5	39	0.128205	-	-	-	T	-	0
ENSG00000164754	RAD21	0.00572763	0.128964		6	39	0.153846	-	-	-	T	-	0
ENSG00000113231	PDE8B	0.00567849	0.128964		17	39	0.435897	-	-	-		-	0	COSMIC:COSM233082,ESP:TMP_ESP_5_76646997
ENSG00000160791	CCR5	0.00583669	0.12968		9	39	0.230769	-	-	-	T	-	0
ENSG00000165752	STK32C	0.00586976	0.130047		9	39	0.230769	-	-	-		-	0
ENSG00000120549	KIAA1217	0.00592886	0.130986		17	39	0.435897	-	-	-		-	0	ESP:TMP_ESP_10_24762290,ESP:TMP_ESP_10_24813435
ENSG00000142864	SERBP1	0.00598531	0.131862		5	39	0.128205	-	-	-	T	-	0
ENSG00000162551	ALPL	0.00604957	0.132533		14	39	0.358974	-	-	-		-	0	ESP:TMP_ESP_1_21889686,ESP:TMP_ESP_1_21903863
ENSG00000172845	SP3	0.0060348	0.132533		4	39	0.102564	-	-	-	T	-	0
ENSG00000085563	ABCB1	0.00607171	0.132648		22	39	0.564103	-	-	-		-	1	dbSNP:rs199676098,dbSNP:rs201346512,dbSNP:rs201352027
ENSG00000142798	HSPG2	0.00609143	0.132708		27	39	0.692308	-	-	-		-	0	dbSNP:rs201884596,dbSNP:rs60853688
ENSG00000136378	ADAMTS7	0.00611227	0.132794		16	39	0.410256	-	-	-		-	0	COSMIC:COSM142220,dbSNP:rs150520631
ENSG00000135424	ITGA7	0.00638578	0.138353		22	39	0.564103	-	-	-		-	0	dbSNP:rs200586885
ENSG00000111011	RSRC2	0.00644507	0.139253		7	39	0.179487	-	-	-		-	0	COSMIC:COSM137592
ENSG00000135953	MFSD9	0.00648031	0.139629		9	39	0.230769	3.15308	0.000807776	0.00285098		[417,417]:2	0
ENSG00000181555	SETD2	0.00654868	0.140331		11	39	0.282051	-	-	-		-	1	dbSNP:rs112945655
ENSG00000170456	DENND5B	0.00654085	0.140331		15	39	0.384615	-	-	-		-	0	COSMIC:COSM185361
ENSG00000160633	SAFB	0.00667549	0.141488		11	39	0.282051	-	-	-		-	0	COSMIC:COSM212863,dbSNP:rs142525379
ENSG00000133835	HSD17B4	0.00668353	0.141488		10	39	0.25641	-	-	-	T	-	0	COSMIC:COSM202282,dbSNP:rs141216594,dbSNP:rs201560431
ENSG00000018510	AGPS	0.00669283	0.141488		14	39	0.358974	1.39545	0.0814397	0.0977277		[396,396]:2	0	dbSNP:rs182602770
ENSG00000119711	ALDH6A1	0.00665958	0.141488		7	39	0.179487	-	-	-	T	-	0
ENSG00000112234	FBXL4	0.00662581	0.141488		7	39	0.179487	-	-	-	T	-	0
ENSG00000145703	IQGAP2	0.00671097	0.14149		20	39	0.512821	-	-	-		-	0
ENSG00000080200	CRYBG3	0.00675723	0.142083		10	39	0.25641	-	-	-		-	0
ENSG00000092094	OSGEP	0.00690839	0.144873		7	39	0.179487	-	-	-	T	-	0	ESP:TMP_ESP_14_20915627
ENSG00000133812	SBF2	0.00696116	0.14559		18	39	0.461538	-	-	-		-	0
ENSG00000100345	MYH9	0.00698885	0.145781		14	39	0.358974	-	-	-		-	1	dbSNP:rs201021615,dbSNP:rs201767994
ENSG00000140382	HMG20A	0.0070387	0.146431		4	39	0.102564	-	-	-	T	-	0	ESP:TMP_ESP_15_77771652
ENSG00000135837	CEP350	0.00709293	0.14665		17	39	0.435897	-	-	-		-	0
ENSG00000134243	SORT1	0.00709625	0.14665		14	39	0.358974	-	-	-		-	0
ENSG00000198690	FAN1	0.00710533	0.14665		6	39	0.153846	-	-	-	T	-	0
ENSG00000039068	CDH1	0.00715874	0.147365		6	39	0.153846	-	-	-	T	-	1
ENSG00000125538	IL1B	0.00727618	0.14939		9	39	0.230769	-	-	-		-	0	COSMIC:COSM94498,dbSNP:rs201772036
ENSG00000137171	KLC4	0.0073048	0.149586		17	39	0.435897	-	-	-		-	0
ENSG00000145730	PAM	0.00753389	0.150969		14	39	0.358974	-	-	-	T	-	0
ENSG00000138768	USO1	0.00750915	0.150969		13	39	0.333333	-	-	-		-	0
ENSG00000128739	SNRPN	0.00754559	0.150969		13	39	0.333333	-	-	-		-	0
ENSG00000072062	PRKACA	0.00751771	0.150969		10	39	0.25641	-	-	-	T	-	0
ENSG00000166349	RAG1	0.00745886	0.150969		21	39	0.538462	-	-	-		-	0	COSMIC:COSM167756,dbSNP:rs202189218
ENSG00000111276	CDKN1B	0.00743959	0.150969		4	39	0.102564	-	-	-	T	-	1
ENSG00000087589	CASS4	0.0075049	0.150969		8	39	0.205128	-	-	-		-	0
ENSG00000173200	PARP15	0.00739818	0.150969		8	39	0.205128	-	-	-		-	0	COSMIC:COSM94927,dbSNP:rs147522681
ENSG00000123104	ITPR2	0.00754044	0.150969		19	39	0.487179	-	-	-		-	0	dbSNP:rs199757095
ENSG00000137776	SLTM	0.00764822	0.152634		9	39	0.230769	-	-	-	T	-	0
ENSG00000088387	DOCK9	0.00769069	0.153092		21	39	0.538462	-	-	-		-	0
ENSG00000109180	OCIAD1	0.00778831	0.154642		5	39	0.128205	-	-	-	T	-	0
ENSG00000169902	TPST1	0.00781562	0.154793		8	39	0.205128	-	-	-		-	0
ENSG00000109265	KIAA1211	0.00800026	0.155312		18	39	0.461538	-	-	-		-	0	dbSNP:rs201913634
ENSG00000187164	KIAA1598	0.00792766	0.155312		7	39	0.179487	-	-	-	T	-	0
ENSG00000083720	OXCT1	0.00788307	0.155312		8	39	0.205128	-	-	-	T	-	0
ENSG00000177548	RABEP2	0.00787872	0.155312		20	39	0.512821	-	-	-	T	-	0	dbSNP:rs143861592,dbSNP:rs185062613
ENSG00000038945	MSR1	0.00795526	0.155312		16	39	0.410256	1.59074	0.0558335	0.0724326		[139,139]:2	0	COSMIC:COSM223235,dbSNP:rs140330735,dbSNP:rs200107180,dbSNP:rs200991168
ENSG00000008277	ADAM22	0.00798357	0.155312		20	39	0.512821	-	-	-		-	0	ESP:TMP_ESP_7_87564350
ENSG00000115163	CENPA	0.00799244	0.155312		8	39	0.205128	-	-	-	T	-	0
ENSG00000177192	PUS1	0.00795631	0.155312		5	39	0.128205	-	-	-		-	0
ENSG00000090989	EXOC1	0.00821841	0.156185		6	39	0.153846	-	-	-	T	-	0
ENSG00000168646	AXIN2	0.00812145	0.156185		7	39	0.179487	-	-	-	T	-	0	dbSNP:rs199599684
ENSG00000183826	BTBD9	0.00819617	0.156185		8	39	0.205128	-	-	-	N	-	0
ENSG00000138346	DNA2	0.00810528	0.156185		5	39	0.128205	-	-	-	T	-	0	dbSNP:rs201458873
ENSG00000113456	RAD1	0.00820278	0.156185		2	39	0.0512821	-	-	-	T	-	0
ENSG00000104490	NCALD	0.00820186	0.156185		2	39	0.0512821	-	-	-	T	-	0
ENSG00000145908	ZNF300	0.00811296	0.156185		6	39	0.153846	-	-	-	T	-	0
ENSG00000155506	LARP1	0.00822445	0.156185		12	39	0.307692	-	-	-	T	-	1
ENSG00000167333	TRIM68	0.00815219	0.156185		6	39	0.153846	-	-	-	T	-	0	ESP:TMP_ESP_11_4615856
ENSG00000173482	PTPRM	0.00831055	0.157229		25	39	0.641026	1.10251	0.135119	0.150831		[1114,1114]:2	0	ESP:TMP_ESP_18_7774100,ESP:TMP_ESP_18_8379118,dbSNP:rs140678689,dbSNP:rs186118302,dbSNP:rs201499307
ENSG00000257103	LSM14A	0.00831951	0.157229		5	39	0.128205	-	-	-	T	-	0	ESP:TMP_ESP_19_34718337
ENSG00000243156	MICAL3	0.00840925	0.157784		19	39	0.487179	-	-	-		-	0	ESP:TMP_ESP_22_18301507,dbSNP:rs190828415,dbSNP:rs200353315
ENSG00000057019	DCBLD2	0.00840636	0.157784		11	39	0.282051	-	-	-	T	-	0	ESP:TMP_ESP_3_98518311
ENSG00000110756	HPS5	0.00838692	0.157784		7	39	0.179487	-	-	-	T	-	0
ENSG00000175711	B3GNTL1	0.00860901	0.161023		12	39	0.307692	-	-	-	N	-	0	dbSNP:rs147442031,dbSNP:rs192413231
ENSG00000196604	POTEF	0.00862291	0.161023		7	39	0.179487	-	-	-	N	-	0	ESP:TMP_ESP_2_130877938
ENSG00000104885	DOT1L	0.00867992	0.161319		15	39	0.384615	-	-	-		-	0	ESP:TMP_ESP_19_2216243
ENSG00000122692	SMU1	0.00867281	0.161319		4	39	0.102564	-	-	-	T	-	0
ENSG00000162613	FUBP1	0.00876152	0.162451		11	39	0.282051	-	-	-		-	0
ENSG00000120314	WDR55	0.00880826	0.162932		9	39	0.230769	-	-	-	T	-	0
ENSG00000055163	CYFIP2	0.00883067	0.162962		24	39	0.615385	-	-	-		-	0
ENSG00000068383	INPP5A	0.00890372	0.163925		9	39	0.230769	-	-	-	T	-	0	dbSNP:rs200980385
ENSG00000083635	NUFIP1	0.00900162	0.164728		9	39	0.230769	-	-	-	T	-	0
ENSG00000135100	HNF1A	0.00897845	0.164728		13	39	0.333333	-	-	-		-	0	ESP:TMP_ESP_12_121434544
ENSG00000163946	FAM208A	0.00905235	0.164728		12	39	0.307692	-	-	-	T	-	0	dbSNP:rs111934125
ENSG00000121073	SLC35B1	0.00904515	0.164728		7	39	0.179487	-	-	-	T	-	0	dbSNP:rs142036912
ENSG00000187231	SESTD1	0.00904855	0.164728		8	39	0.205128	-	-	-	N	-	0
ENSG00000132912	DCTN4	0.00910434	0.16529		6	39	0.153846	-	-	-	T	-	0
ENSG00000069248	NUP133	0.00917503	0.166189		8	39	0.205128	-	-	-	N	-	0
ENSG00000085978	ATG16L1	0.00931508	0.16795		12	39	0.307692	-	-	-	T	-	0
ENSG00000163902	RPN1	0.00931107	0.16795		6	39	0.153846	-	-	-	T	-	0
ENSG00000119285	HEATR1	0.0093868	0.168084		15	39	0.384615	-	-	-		-	0	dbSNP:rs201241450
ENSG00000188375	H3F3C	0.00938097	0.168084		5	39	0.128205	-	-	-	T	-	0
ENSG00000176142	TMEM39A	0.00936511	0.168084		5	39	0.128205	-	-	-	T	-	0
ENSG00000164077	MON1A	0.00942294	0.168346		5	39	0.128205	-	-	-	T	-	0
ENSG00000006530	AGK	0.00946575	0.16848		8	39	0.205128	-	-	-	T	-	0	ESP:TMP_ESP_7_141300992
ENSG00000101974	ATP11C	0.00947335	0.16848		15	39	0.384615	-	-	-		-	0
ENSG00000138709	LARP1B	0.0096283	0.170462		13	39	0.333333	-	-	-		-	0
ENSG00000134294	SLC38A2	0.00961865	0.170462		7	39	0.179487	-	-	-	T	-	0
ENSG00000086827	ZW10	0.00969567	0.171268		4	39	0.102564	-	-	-	T	-	0
ENSG00000142765	SYTL1	0.00975037	0.171462		10	39	0.25641	-	-	-	T	-	0
ENSG00000096093	EFHC1	0.00972907	0.171462		7	39	0.179487	-	-	-	T	-	0	ESP:TMP_ESP_6_52343925
ENSG00000108515	ENO3	0.00982569	0.171632		9	39	0.230769	-	-	-	T	-	0	dbSNP:rs191645770
ENSG00000161800	RACGAP1	0.00980924	0.171632		15	39	0.384615	-	-	-	T	-	0	dbSNP:rs143928094
ENSG00000137575	SDCBP	0.0097864	0.171632		4	39	0.102564	-	-	-	T	-	0
ENSG00000132549	VPS13B	0.00984995	0.171674		25	39	0.641026	1.10251	0.135119	0.150831		[1142,1142]:2	0
ENSG00000159640	ACE	0.00987493	0.171727		21	39	0.538462	-	-	-		-	0	ESP:TMP_ESP_17_61560861
ENSG00000138777	PPA2	0.00993108	0.172322		2	39	0.0512821	-	-	-	T	-	0	dbSNP:rs112346417,dbSNP:rs138215926
ENSG00000130768	SMPDL3B	0.00995446	0.172346		7	39	0.179487	-	-	-	N	-	0	ESP:TMP_ESP_1_28271878
ENSG00000151233	GXYLT1	0.0100747	0.174044		4	39	0.102564	-	-	-	T	-	0
ENSG00000136098	NEK3	0.0101097	0.174264		4	39	0.102564	-	-	-	T	-	0
ENSG00000153029	MR1	0.0101815	0.174804		10	39	0.25641	-	-	-	T	-	0
ENSG00000140199	SLC12A6	0.0101855	0.174804		12	39	0.307692	-	-	-	T	-	0
ENSG00000122359	ANXA11	0.0102201	0.175014		12	39	0.307692	-	-	-	N	-	0	dbSNP:rs2784775
ENSG00000164597	COG5	0.0103258	0.176438		13	39	0.333333	-	-	-		-	0
ENSG00000105671	DDX49	0.0104976	0.177817		9	39	0.230769	-	-	-	T	-	0
ENSG00000008294	SPAG9	0.01044	0.177817		9	39	0.230769	-	-	-	T	-	0
ENSG00000111674	ENO2	0.0104731	0.177817		11	39	0.282051	-	-	-	T	-	0
ENSG00000177575	CD163	0.0105199	0.177817		21	39	0.538462	0.736341	0.230762	0.237694		[606,606]:2	0	COSMIC:COSM231984,COSMIC:COSM298612,ESP:TMP_ESP_12_7640255
ENSG00000146776	ATXN7L1	0.0105011	0.177817		10	39	0.25641	-	-	-		-	0
ENSG00000204920	ZNF155	0.0105461	0.177878		11	39	0.282051	-	-	-	T	-	0	ESP:TMP_ESP_19_44469399
ENSG00000113263	ITK	0.0106377	0.179037		23	39	0.589744	-	-	-		-	0	ESP:TMP_ESP_5_156590508,ESP:TMP_ESP_5_156638340,ESP:TMP_ESP_5_156672702
ENSG00000204120	GIGYF2	0.0106767	0.17921		10	39	0.25641	-	-	-	N	-	0
ENSG00000143776	CDC42BPA	0.0107008	0.17921		17	39	0.435897	-	-	-		-	0	ESP:TMP_ESP_1_227192838
ENSG00000171634	BPTF	0.0107393	0.17921		15	39	0.384615	-	-	-		-	0	ESP:TMP_ESP_17_65900989,dbSNP:rs182932345
ENSG00000096080	MRPS18A	0.0107316	0.17921		9	39	0.230769	-	-	-	T	-	0	dbSNP:rs79412180
ENSG00000146197	SCUBE3	0.0107973	0.179789		12	39	0.307692	-	-	-		-	0
ENSG00000115464	USP34	0.0108199	0.179789		19	39	0.487179	-	-	-		-	0
ENSG00000131503	ANKHD1	0.0108615	0.180098		12	39	0.307692	-	-	-		-	0
ENSG00000173801	JUP	0.010967	0.181465		19	39	0.487179	-	-	-		-	0	ESP:TMP_ESP_17_39925782,dbSNP:rs199591001,dbSNP:rs200255135
ENSG00000165801	ARHGEF40	0.0110309	0.181502		15	39	0.384615	-	-	-	T	-	0
ENSG00000169992	NLGN2	0.0110259	0.181502		12	39	0.307692	-	-	-	T	-	0
ENSG00000120526	NUDCD1	0.0110387	0.181502		6	39	0.153846	-	-	-	T	-	0
ENSG00000054523	KIF1B	0.0111207	0.182451		17	39	0.435897	-	-	-		-	0
ENSG00000113163	COL4A3BP	0.0111662	0.182451		6	39	0.153846	-	-	-	T	-	0	dbSNP:rs144328589
ENSG00000009830	POMT2	0.0111513	0.182451		11	39	0.282051	-	-	-	T	-	0
ENSG00000204604	ZNF468	0.0113212	0.184599		8	39	0.205128	-	-	-		-	0
ENSG00000166925	TSC22D4	0.0113807	0.185184		13	39	0.333333	1.83486	0.0332632	0.0498948		[82,82]:2	0	dbSNP:rs149293524
ENSG00000239998	LILRA2	0.0114087	0.185256		18	39	0.461538	-	-	-		-	0	ESP:TMP_ESP_19_55085351,ESP:TMP_ESP_19_55085883,dbSNP:rs143437645,dbSNP:rs145854955
ENSG00000144677	CTDSPL	0.0115341	0.186906		3	39	0.0769231	-	-	-	T	-	0
ENSG00000102606	ARHGEF7	0.0117901	0.189488		12	39	0.307692	-	-	-		-	0
ENSG00000075945	KIFAP3	0.0117699	0.189488		6	39	0.153846	-	-	-	N	-	0
ENSG00000129667	RHBDF2	0.0117702	0.189488		18	39	0.461538	-	-	-		-	0
ENSG00000138592	USP8	0.011772	0.189488		5	39	0.128205	-	-	-	T	-	0
ENSG00000196437	ZNF569	0.0119419	0.191534		7	39	0.179487	-	-	-		-	0
ENSG00000113369	ARRDC3	0.0121262	0.194093		2	39	0.0512821	-	-	-	T	-	0
ENSG00000134460	IL2RA	0.0122946	0.195989		10	39	0.25641	-	-	-	T	-	0
ENSG00000064393	HIPK2	0.0122851	0.195989		9	39	0.230769	-	-	-		-	0
ENSG00000135365	PHF21A	0.0123304	0.19616		12	39	0.307692	-	-	-	T	-	0	COSMIC:COSM281602,ESP:TMP_ESP_11_45949082
ENSG00000179837	RBM15B	0.0124018	0.196587		5	39	0.128205	-	-	-	T	-	0
ENSG00000139354	GAS2L3	0.0124073	0.196587		9	39	0.230769	-	-	-		-	0
ENSG00000166900	STX3	0.0124582	0.196996		9	39	0.230769	-	-	-	T	-	0
ENSG00000171988	JMJD1C	0.0124861	0.197039		10	39	0.25641	-	-	-		-	0
ENSG00000187860	CCDC157	0.0125305	0.197343		7	39	0.179487	-	-	-	T	-	0
ENSG00000169554	ZEB2	0.0126553	0.198909		13	39	0.333333	-	-	-		-	0
ENSG00000184500	PROS1	0.0127432	0.199664		11	39	0.282051	2.56721	0.00512607	0.0111842		[316,316]:2	0	COSMIC:COSM139469,ESP:TMP_ESP_3_93615439
ENSG00000113971	NPHP3	0.0127542	0.199664		18	39	0.461538	-	-	-		-	0
ENSG00000188313	PLSCR1	0.0129001	0.200745		4	39	0.102564	-	-	-	T	-	0
ENSG00000157450	RNF111	0.0128889	0.200745		17	39	0.435897	-	-	-		-	0
ENSG00000119686	FLVCR2	0.012864	0.200745		6	39	0.153846	-	-	-	T	-	0
ENSG00000163516	ANKZF1	0.0129792	0.20104		15	39	0.384615	-	-	-	T	-	0	dbSNP:rs147085295,dbSNP:rs201165210
ENSG00000159314	ARHGAP27	0.012996	0.20104		8	39	0.205128	-	-	-	T	-	0
ENSG00000162415	ZSWIM5	0.0129603	0.20104		8	39	0.205128	2.56721	0.00512607	0.0111842		[452,452]:2	0
ENSG00000196230	TUBB	0.0131	0.201063		6	39	0.153846	-	-	-	T	-	0
ENSG00000198964	SGMS1	0.0130677	0.201063		3	39	0.0769231	-	-	-	T	-	0	COSMIC:COSM191112
ENSG00000165102	HGSNAT	0.0130844	0.201063		8	39	0.205128	-	-	-	T	-	0
ENSG00000115524	SF3B1	0.0130947	0.201063		12	39	0.307692	-	-	-		-	1	dbSNP:rs199788422
ENSG00000119326	CTNNAL1	0.0131796	0.20189		9	39	0.230769	-	-	-	T	-	0
ENSG00000136738	STAM	0.0132256	0.2022		8	39	0.205128	-	-	-	T	-	0	dbSNP:rs141778604
ENSG00000124496	TRERF1	0.0133006	0.20295		10	39	0.25641	-	-	-		-	0
ENSG00000150636	CCDC102B	0.0133463	0.203253		12	39	0.307692	-	-	-		-	0	COSMIC:COSM226811,dbSNP:rs186843401
ENSG00000131023	LATS1	0.0134242	0.203648		8	39	0.205128	-	-	-		-	0
ENSG00000172869	DMXL1	0.0134031	0.203648		17	39	0.435897	-	-	-		-	0	dbSNP:rs142149872
ENSG00000121005	CRISPLD1	0.0134651	0.203873		16	39	0.410256	2.03459	0.020946	0.0369635		[210,210]:3	0	dbSNP:rs149361480,dbSNP:rs199512098
ENSG00000123815	ADCK4	0.0135374	0.204574		8	39	0.205128	-	-	-		-	0
ENSG00000182871	COL18A1	0.0136455	0.205811		19	39	0.487179	-	-	-		-	0	ESP:TMP_ESP_21_46899909,ESP:TMP_ESP_21_46900601,ESP:TMP_ESP_21_46913441,dbSNP:rs9983692
ENSG00000070018	LRP6	0.0136785	0.205913		12	39	0.307692	-	-	-		-	0
ENSG00000118482	PHF3	0.013746	0.206137		14	39	0.358974	-	-	-		-	0
ENSG00000135541	AHI1	0.0137367	0.206137		11	39	0.282051	-	-	-		-	0
ENSG00000145675	PIK3R1	0.0138242	0.206915		6	39	0.153846	-	-	-	T	-	1
ENSG00000167851	CD300A	0.0138957	0.207193		8	39	0.205128	-	-	-	N	-	0
ENSG00000251247	ZNF345	0.0138877	0.207193		12	39	0.307692	-	-	-	T	-	0
ENSG00000170390	DCLK2	0.0139561	0.207699		9	39	0.230769	-	-	-		-	0
ENSG00000156671	SAMD8	0.014073	0.208729		15	39	0.384615	-	-	-	T	-	0
ENSG00000114857	NKTR	0.0140785	0.208729		8	39	0.205128	-	-	-	N	-	0
ENSG00000132359	RAP1GAP2	0.0142249	0.210502		19	39	0.487179	1.59074	0.0558335	0.0724326		[9,9]:2	0
ENSG00000163935	SFMBT1	0.014259	0.210609		6	39	0.153846	-	-	-		-	0
ENSG00000171227	TMEM37	0.0143222	0.211145		3	39	0.0769231	-	-	-	T	-	0	dbSNP:rs201433053
ENSG00000157212	PAXIP1	0.0144652	0.212057		4	39	0.102564	-	-	-	T	-	0
ENSG00000025772	TOMM34	0.0144652	0.212057		4	39	0.102564	-	-	-	T	-	0
ENSG00000213240	NOTCH2NL	0.014412	0.212057		5	39	0.128205	-	-	-	T	-	0
ENSG00000123983	ACSL3	0.0145264	0.212557		7	39	0.179487	-	-	-	T	-	0
ENSG00000186998	EMID1	0.0146242	0.21359		12	39	0.307692	-	-	-		-	0	COSMIC:COSM88653,dbSNP:rs147580499
ENSG00000138674	SEC31A	0.0147081	0.213622		12	39	0.307692	-	-	-		-	0
ENSG00000175471	MCTP1	0.0146813	0.213622		17	39	0.435897	-	-	-		-	0	COSMIC:COSM231061,ESP:TMP_ESP_5_94248638
ENSG00000121022	COPS5	0.0146675	0.213622		6	39	0.153846	-	-	-	T	-	0
ENSG00000033178	UBA6	0.0147577	0.213945		9	39	0.230769	-	-	-		-	0
ENSG00000158321	AUTS2	0.0147873	0.21398		17	39	0.435897	-	-	-		-	0	ESP:TMP_ESP_7_70229971
ENSG00000070785	EIF2B3	0.0148789	0.214909		3	39	0.0769231	-	-	-	T	-	0	COSMIC:COSM300285,dbSNP:rs139526549
ENSG00000038210	PI4K2B	0.0149125	0.214998		8	39	0.205128	-	-	-	T	-	0	dbSNP:rs28478098
ENSG00000029993	HMGB3	0.0150684	0.216083		2	39	0.0512821	-	-	-	T	-	0
ENSG00000149084	HSD17B12	0.015052	0.216083		5	39	0.128205	-	-	-	T	-	0
ENSG00000080503	SMARCA2	0.0150705	0.216083		10	39	0.25641	-	-	-		-	0	dbSNP:rs146132694
ENSG00000196628	TCF4	0.0152939	0.218582		7	39	0.179487	-	-	-	T	-	0
ENSG00000151422	FER	0.0153109	0.218582		7	39	0.179487	-	-	-		-	0
ENSG00000140521	POLG	0.0153283	0.218582		7	39	0.179487	-	-	-		-	0
ENSG00000006459	JHDM1D	0.0153612	0.218653		8	39	0.205128	-	-	-	T	-	0
ENSG00000108469	RECQL5	0.0153947	0.218734		12	39	0.307692	-	-	-		-	0	ESP:TMP_ESP_17_73667820,dbSNP:rs200823933
ENSG00000141447	OSBPL1A	0.0155624	0.220716		6	39	0.153846	-	-	-	T	-	0	dbSNP:rs202077928
ENSG00000149257	SERPINH1	0.0156997	0.221759		2	39	0.0512821	-	-	-	T	-	0	ESP:TMP_ESP_11_75283067
ENSG00000145649	GZMA	0.0156645	0.221759		6	39	0.153846	-	-	-		-	0	dbSNP:rs201968763
ENSG00000145979	TBC1D7	0.0157208	0.221759		6	39	0.153846	-	-	-	T	-	0
ENSG00000146414	SHPRH	0.0158472	0.221945		12	39	0.307692	-	-	-		-	0	COSMIC:COSM216735
ENSG00000062716	VMP1	0.0158136	0.221945		5	39	0.128205	-	-	-	T	-	0
ENSG00000112893	MAN2A1	0.0157717	0.221945		13	39	0.333333	-	-	-		-	0
ENSG00000006652	IFRD1	0.0158325	0.221945		10	39	0.25641	-	-	-	T	-	0
ENSG00000110497	AMBRA1	0.0158955	0.222225		11	39	0.282051	-	-	-		-	0	dbSNP:rs138854891
ENSG00000167107	ACSF2	0.0160538	0.223657		9	39	0.230769	-	-	-	T	-	0
ENSG00000113504	SLC12A7	0.0160549	0.223657		17	39	0.435897	-	-	-		-	0	COSMIC:COSM108453,ESP:TMP_ESP_5_1077963,dbSNP:rs143947354
ENSG00000163029	SMC6	0.0161968	0.225234		14	39	0.358974	-	-	-		-	0	COSMIC:COSM148805
ENSG00000097021	ACOT7	0.0163021	0.226296		7	39	0.179487	-	-	-	T	-	0
ENSG00000139697	SBNO1	0.0165257	0.22859		11	39	0.282051	-	-	-		-	0	dbSNP:rs181941893
ENSG00000132182	NUP210	0.016521	0.22859		13	39	0.333333	-	-	-		-	0
ENSG00000188732	FAM221A	0.0166018	0.229239		5	39	0.128205	-	-	-	T	-	0	COSMIC:COSM223148,ESP:TMP_ESP_7_23729128
ENSG00000109133	TMEM33	0.0166377	0.229332		4	39	0.102564	-	-	-	T	-	0	dbSNP:rs185525877
ENSG00000165959	CLMN	0.016724	0.229714		12	39	0.307692	-	-	-		-	0	dbSNP:rs202217088,dbSNP:rs35569227
ENSG00000099326	MZF1	0.0166994	0.229714		4	39	0.102564	-	-	-	T	-	0
ENSG00000126214	KLC1	0.0169701	0.232686		6	39	0.153846	-	-	-	T	-	0	ESP:TMP_ESP_14_104124122
ENSG00000154001	PPP2R5E	0.0171308	0.233831		9	39	0.230769	-	-	-	T	-	0	dbSNP:rs143836198
ENSG00000099804	CDC34	0.0171728	0.233831		4	39	0.102564	-	-	-	T	-	0
ENSG00000107104	KANK1	0.0171728	0.233831		5	39	0.128205	-	-	-	T	-	0
ENSG00000156042	TTC18	0.0170924	0.233831		10	39	0.25641	-	-	-		-	0
ENSG00000168958	MFF	0.0173318	0.234325		4	39	0.102564	-	-	-	T	-	0
ENSG00000169718	DUS1L	0.0173462	0.234325		4	39	0.102564	-	-	-	T	-	0
ENSG00000169592	INO80E	0.0173069	0.234325		16	39	0.410256	-	-	-	T	-	0	ESP:TMP_ESP_16_30017900
ENSG00000167595	C19orf55	0.0173585	0.234325		9	39	0.230769	-	-	-		-	0
ENSG00000138468	SENP7	0.0173517	0.234325		15	39	0.384615	-	-	-		-	0	COSMIC:COSM167087,ESP:TMP_ESP_3_101046681
ENSG00000129204	USP6	0.017525	0.23535		18	39	0.461538	-	-	-		-	0	COSMIC:COSM106706,COSMIC:COSM110181,COSMIC:COSM118841,dbSNP:rs117611547,dbSNP:rs139808379,dbSNP:rs144225958
ENSG00000077157	PPP1R12B	0.01754	0.23535		11	39	0.282051	-	-	-	T	-	0
ENSG00000182621	PLCB1	0.0175113	0.23535		29	39	0.74359	-	-	-		-	0	COSMIC:COSM276793,COSMIC:COSM276794,dbSNP:rs138077430
ENSG00000108963	DPH1	0.0175845	0.23535		11	39	0.282051	-	-	-	T	-	0	ESP:TMP_ESP_17_1937063,dbSNP:rs145234879
ENSG00000156256	USP16	0.0175681	0.23535		5	39	0.128205	-	-	-	T	-	0
ENSG00000132965	ALOX5AP	0.0180615	0.240588		5	39	0.128205	-	-	-	T	-	0
ENSG00000123329	ARHGAP9	0.0180555	0.240588		21	39	0.538462	-	-	-		-	0	COSMIC:COSM299742,ESP:TMP_ESP_12_57861123,ESP:TMP_ESP_12_57883951,dbSNP:rs149727404
ENSG00000100749	VRK1	0.0180735	0.240588		3	39	0.0769231	-	-	-	T	-	0
ENSG00000121236	TRIM6	0.0180985	0.240588		7	39	0.179487	-	-	-	T	-	0
ENSG00000133193	FAM104A	0.0182136	0.241707		5	39	0.128205	-	-	-	T	-	0
ENSG00000065243	PKN2	0.0184104	0.241864		10	39	0.25641	-	-	-		-	0
ENSG00000122482	ZNF644	0.0182576	0.241864		8	39	0.205128	-	-	-	T	-	0
ENSG00000109971	HSPA8	0.0183121	0.241864		5	39	0.128205	-	-	-	T	-	0
ENSG00000168884	TNIP2	0.0183616	0.241864		3	39	0.0769231	-	-	-	T	-	0
ENSG00000112282	MED23	0.0183868	0.241864		11	39	0.282051	-	-	-		-	0	ESP:TMP_ESP_6_131900391
ENSG00000141569	TRIM65	0.018332	0.241864		9	39	0.230769	-	-	-	T	-	0
ENSG00000143079	CTTNBP2NL	0.018472	0.242252		6	39	0.153846	-	-	-	T	-	0
ENSG00000111885	MAN1A1	0.0185017	0.242252		6	39	0.153846	-	-	-	T	-	0
ENSG00000137767	SQRDL	0.0185395	0.242342		8	39	0.205128	-	-	-		-	0	dbSNP:rs142428650
ENSG00000108272	DHRS11	0.0186305	0.243076		7	39	0.179487	-	-	-	T	-	0
ENSG00000173262	SLC2A14	0.0186867	0.243076		11	39	0.282051	-	-	-		-	0	ESP:TMP_ESP_12_7970574,ESP:TMP_ESP_12_7984239
ENSG00000140931	CMTM3	0.0186886	0.243076		2	39	0.0512821	-	-	-	T	-	0
ENSG00000196290	NIF3L1	0.0189041	0.245472		6	39	0.153846	-	-	-	T	-	0	ESP:TMP_ESP_2_201758004
ENSG00000073614	KDM5A	0.0191138	0.247784		11	39	0.282051	-	-	-		-	0	ESP:TMP_ESP_12_432942
ENSG00000182185	RAD51B	0.0193993	0.248314		9	39	0.230769	3.15308	0.000807776	0.00285098		[161,161]:2	0
ENSG00000204217	BMPR2	0.0193202	0.248314		10	39	0.25641	-	-	-		-	0
ENSG00000018189	RUFY3	0.0192394	0.248314		7	39	0.179487	-	-	-	T	-	0
ENSG00000116747	TROVE2	0.0193324	0.248314		6	39	0.153846	-	-	-	T	-	0	ESP:TMP_ESP_1_193053776
ENSG00000088888	MAVS	0.0193069	0.248314		6	39	0.153846	-	-	-	T	-	0
ENSG00000179889	PDXDC1	0.0191874	0.248314		17	39	0.435897	-	-	-	N	-	0
ENSG00000205268	PDE7A	0.0193663	0.248314		6	39	0.153846	-	-	-	T	-	0
ENSG00000138795	LEF1	0.0194079	0.248314		10	39	0.25641	-	-	-	T	-	0	ESP:TMP_ESP_4_108999335
ENSG00000170832	USP32	0.0195397	0.248905		16	39	0.410256	-	-	-		-	0
ENSG00000120594	PLXDC2	0.0195811	0.248905		8	39	0.205128	2.56721	0.00512607	0.0111842		[294,294]:2	0	dbSNP:rs184453481
ENSG00000100227	POLDIP3	0.0195497	0.248905		8	39	0.205128	-	-	-	T	-	0	dbSNP:rs143816327
ENSG00000101160	CTSZ	0.0195731	0.248905		7	39	0.179487	-	-	-	T	-	0
ENSG00000159131	GART	0.0197238	0.249831		10	39	0.25641	-	-	-		-	0
ENSG00000159692	CTBP1	0.0197495	0.249831		13	39	0.333333	-	-	-	T	-	0
ENSG00000168497	SDPR	0.0196921	0.249831		7	39	0.179487	-	-	-		-	0	ESP:TMP_ESP_2_192701296,ESP:TMP_ESP_2_192701345,dbSNP:rs200501578
ENSG00000133961	NUMB	0.0197814	0.249832		5	39	0.128205	-	-	-	T	-	0	ESP:TMP_ESP_14_73751123
ENSG00000100697	DICER1	0.019819	0.249905		11	39	0.282051	-	-	-		-	1
ENSG00000101335	MYL9	0.0199209	0.250786		4	39	0.102564	-	-	-	T	-	0
ENSG00000165359	DDX26B	0.0199984	0.251359		4	39	0.102564	-	-	-	T	-	0
ENSG00000196263	ZNF471	0.0201541	0.252909		10	39	0.25641	1.59074	0.0558335	0.0724326		[24,24]:2	0
ENSG00000159915	ZNF233	0.0202725	0.253989		7	39	0.179487	-	-	-		-	0
ENSG00000118007	STAG1	0.020464	0.255979		12	39	0.307692	-	-	-		-	0	COSMIC:COSM227239
ENSG00000044446	PHKA2	0.0207419	0.25863		9	39	0.230769	-	-	-		-	0
ENSG00000135341	MAP3K7	0.0207094	0.25863		6	39	0.153846	-	-	-	T	-	0
ENSG00000008441	NFIX	0.0209436	0.260731		10	39	0.25641	-	-	-	T	-	0	ESP:TMP_ESP_19_13183971
ENSG00000054219	LY75	0.0210463	0.261594		14	39	0.358974	2.56721	0.00512607	0.0111842		[1478,1478]:2	0	dbSNP:rs142810241
ENSG00000060237	WNK1	0.021207	0.26219		19	39	0.487179	-	-	-		-	0
ENSG00000111186	WNT5B	0.0212485	0.26219		7	39	0.179487	-	-	-	T	-	0	ESP:TMP_ESP_12_1742119
ENSG00000140632	GLYR1	0.0212057	0.26219		8	39	0.205128	-	-	-	T	-	0
ENSG00000155111	CDK19	0.0212948	0.26219		6	39	0.153846	-	-	-	T	-	0
ENSG00000151490	PTPRO	0.021277	0.26219		25	39	0.641026	0.809575	0.209092	0.220097		[275,275]:2	0	ESP:TMP_ESP_12_15654845,ESP:TMP_ESP_12_15702148
ENSG00000115947	ORC4	0.0212582	0.26219		7	39	0.179487	-	-	-	T	-	0
ENSG00000100077	ADRBK2	0.0216204	0.265782		11	39	0.282051	-	-	-		-	0	ESP:TMP_ESP_22_26057582,dbSNP:rs148293038
ENSG00000119522	DENND1A	0.0217106	0.266473		15	39	0.384615	-	-	-		-	0	ESP:TMP_ESP_9_126345483,dbSNP:rs116352541,dbSNP:rs146310416
ENSG00000115548	KDM3A	0.0218714	0.268027		12	39	0.307692	-	-	-		-	0
ENSG00000115267	IFIH1	0.0220897	0.27028		5	39	0.128205	-	-	-	T	-	0	COSMIC:COSM275529,dbSNP:rs35677292
ENSG00000039123	SKIV2L2	0.0224657	0.273845		11	39	0.282051	-	-	-	T	-	0	ESP:TMP_ESP_5_54603420
ENSG00000110900	TSPAN11	0.0224263	0.273845		7	39	0.179487	-	-	-	T	-	0	ESP:TMP_ESP_12_31116805
ENSG00000120533	ENY2	0.0224858	0.273845		3	39	0.0769231	-	-	-	T	-	0
ENSG00000158773	USF1	0.0226889	0.27589		16	39	0.410256	-	-	-	T	-	0	ESP:TMP_ESP_1_161010452,ESP:TMP_ESP_1_161018326,dbSNP:rs201790759
ENSG00000196378	ZNF34	0.0227442	0.276123		10	39	0.25641	-	-	-		-	0
ENSG00000137642	SORL1	0.0227785	0.276123		20	39	0.512821	-	-	-		-	0
ENSG00000197343	ZNF655	0.0228998	0.276738		4	39	0.102564	-	-	-	T	-	0
ENSG00000198355	PIM3	0.0228998	0.276738		2	39	0.0512821	-	-	-	T	-	0
ENSG00000068885	IFT80	0.0230258	0.276765		14	39	0.358974	1.59074	0.0558335	0.0724326		[410,410]:2	0	dbSNP:rs184529575,dbSNP:rs200815079
ENSG00000081237	PTPRC	0.0230334	0.276765		22	39	0.564103	-	-	-		-	0
ENSG00000197937	ZNF347	0.0230613	0.276765		9	39	0.230769	-	-	-		-	0	dbSNP:rs145043419
ENSG00000188994	ZNF292	0.0229624	0.276765		7	39	0.179487	-	-	-	N	-	0	COSMIC:COSM288706,COSMIC:COSM288707
ENSG00000196642	RABL6	0.0230784	0.276765		19	39	0.487179	1.83486	0.0332632	0.0498948		[412,412]:2	0	dbSNP:rs199902918
ENSG00000161267	BDH1	0.0234075	0.278236		7	39	0.179487	-	-	-	T	-	0
ENSG00000131462	TUBG1	0.0233365	0.278236		6	39	0.153846	-	-	-	T	-	0
ENSG00000164038	SLC9B2	0.0234139	0.278236		6	39	0.153846	-	-	-	T	-	0
ENSG00000143437	ARNT	0.0233991	0.278236		15	39	0.384615	-	-	-		-	0
ENSG00000130559	CAMSAP1	0.0233495	0.278236		7	39	0.179487	-	-	-		-	0
ENSG00000145388	METTL14	0.0234073	0.278236		6	39	0.153846	-	-	-	T	-	0
ENSG00000008056	SYN1	0.0236899	0.280664		9	39	0.230769	-	-	-	T	-	0	dbSNP:rs189708621
ENSG00000132122	SPATA6	0.0236788	0.280664		8	39	0.205128	-	-	-	T	-	0
ENSG00000100234	TIMP3	0.0238391	0.281503		3	39	0.0769231	-	-	-	T	-	0
ENSG00000197077	KIAA1671	0.0238683	0.281503		7	39	0.179487	-	-	-	T	-	0
ENSG00000070961	ATP2B1	0.0238297	0.281503		7	39	0.179487	-	-	-	T	-	0
ENSG00000145103	ILDR1	0.0239111	0.281583		14	39	0.358974	1.59074	0.0558335	0.0724326		[438,438]:2	0
ENSG00000111361	EIF2B1	0.0240778	0.283122		6	39	0.153846	-	-	-	T	-	0
ENSG00000066933	MYO9A	0.0242976	0.285278		17	39	0.435897	-	-	-		-	0	ESP:TMP_ESP_15_72208696,dbSNP:rs145598484
ENSG00000081923	ATP8B1	0.0243711	0.285714		16	39	0.410256	-	-	-		-	0
ENSG00000080298	RFX3	0.0244148	0.285799		4	39	0.102564	-	-	-	T	-	0
ENSG00000157036	EXOG	0.0244806	0.286142		2	39	0.0512821	-	-	-	T	-	0
ENSG00000008300	CELSR3	0.0246593	0.287802		24	39	0.615385	-	-	-		-	0	dbSNP:rs200099722
ENSG00000128908	INO80	0.024789	0.288886		16	39	0.410256	-	-	-		-	0	ESP:TMP_ESP_15_41297896
ENSG00000115020	PIKFYVE	0.0250278	0.290346		13	39	0.333333	1.59074	0.0558335	0.0724326		[1701,1701]:2	0	COSMIC:COSM134052
ENSG00000115355	CCDC88A	0.0250677	0.290346		14	39	0.358974	-	-	-		-	0	ESP:TMP_ESP_2_55570913
ENSG00000163681	SLMAP	0.0250595	0.290346		12	39	0.307692	-	-	-		-	0
ENSG00000105122	RASAL3	0.0250994	0.290346		13	39	0.333333	-	-	-	T	-	0	ESP:TMP_ESP_19_15571949,dbSNP:rs181434938
ENSG00000057468	MSH4	0.0250721	0.290346		19	39	0.487179	-	-	-		-	0	ESP:TMP_ESP_1_76356455
ENSG00000166169	POLL	0.0251509	0.290513		8	39	0.205128	-	-	-		-	0
ENSG00000010319	SEMA3G	0.0252341	0.291046		10	39	0.25641	-	-	-	T	-	0
ENSG00000184788	SATL1	0.0255634	0.294411		5	39	0.128205	-	-	-	T	-	0
ENSG00000126773	PCNXL4	0.0256909	0.295445		14	39	0.358974	-	-	-	T	-	0
ENSG00000019144	PHLDB1	0.0258063	0.296338		20	39	0.512821	-	-	-		-	0	ESP:TMP_ESP_11_118526377,dbSNP:rs45587035
ENSG00000125730	C3	0.0259489	0.297106		25	39	0.641026	1.10251	0.135119	0.150831		[1326,1326]:2	0	ESP:TMP_ESP_19_6732405,dbSNP:rs199717612,dbSNP:rs200878391,dbSNP:rs74176203
ENSG00000165138	ANKS6	0.0259201	0.297106		11	39	0.282051	-	-	-		-	0
ENSG00000178338	ZNF354B	0.0259935	0.297182		6	39	0.153846	-	-	-	T	-	0
ENSG00000171056	SOX7	0.026077	0.29727		8	39	0.205128	-	-	-	T	-	0
ENSG00000079432	CIC	0.0260584	0.29727		14	39	0.358974	-	-	-		-	0	COSMIC:COSM107328,dbSNP:rs147753753
ENSG00000169116	PARM1	0.026206	0.298307		7	39	0.179487	-	-	-		-	0
ENSG00000157483	MYO1E	0.0263663	0.299697		15	39	0.384615	-	-	-	T	-	0	dbSNP:rs183237224
ENSG00000043514	TRIT1	0.0264235	0.299912		9	39	0.230769	-	-	-	T	-	0
ENSG00000011260	UTP18	0.0265156	0.300523		7	39	0.179487	-	-	-	T	-	0
ENSG00000078053	AMPH	0.026642	0.301417		25	39	0.641026	-	-	-		-	0	ESP:TMP_ESP_7_38516566,dbSNP:rs142962296,dbSNP:rs145345136
ENSG00000004799	PDK4	0.0266713	0.301417		12	39	0.307692	-	-	-		-	0	ESP:TMP_ESP_7_95217176,dbSNP:rs184350191
ENSG00000159733	ZFYVE28	0.0267217	0.301552		16	39	0.410256	-	-	-		-	0
ENSG00000110944	IL23A	0.0269385	0.301838		7	39	0.179487	-	-	-	T	-	0
ENSG00000085511	MAP3K4	0.0270935	0.301838		12	39	0.307692	-	-	-		-	0
ENSG00000174371	EXO1	0.0270794	0.301838		5	39	0.128205	-	-	-	T	-	0
ENSG00000198948	MFAP3L	0.0270027	0.301838		3	39	0.0769231	-	-	-	T	-	0
ENSG00000060339	CCAR1	0.0268869	0.301838		11	39	0.282051	-	-	-		-	0
ENSG00000198951	NAGA	0.0268171	0.301838		8	39	0.205128	-	-	-	T	-	0
ENSG00000156515	HK1	0.0270886	0.301838		11	39	0.282051	-	-	-	T	-	0
ENSG00000182580	EPHB3	0.0268288	0.301838		11	39	0.282051	-	-	-		-	0	dbSNP:rs56029711
ENSG00000107263	RAPGEF1	0.0269641	0.301838		16	39	0.410256	1.39545	0.0814397	0.0977277		[763,763]:2	0	COSMIC:COSM263251,ESP:TMP_ESP_9_134518780
ENSG00000136381	IREB2	0.027196	0.301993		7	39	0.179487	-	-	-	T	-	0
ENSG00000166881	TMEM194A	0.0271472	0.301993		6	39	0.153846	-	-	-	T	-	0
ENSG00000152404	CWF19L2	0.0272229	0.301993		9	39	0.230769	-	-	-		-	0	dbSNP:rs139979724
ENSG00000115042	FAHD2A	0.027364	0.302702		3	39	0.0769231	-	-	-	T	-	0
ENSG00000134574	DDB2	0.0273502	0.302702		3	39	0.0769231	-	-	-	T	-	0
ENSG00000178568	ERBB4	0.027464	0.30338		29	39	0.74359	0.644659	0.259574	0.26286		[1053,1058]:3	0	COSMIC:COSM131778,ESP:TMP_ESP_2_212285172
ENSG00000258890	CEP95	0.0275032	0.303386		5	39	0.128205	-	-	-	T	-	0
ENSG00000186907	RTN4RL2	0.0275892	0.303907		3	39	0.0769231	-	-	-	T	-	0
ENSG00000042088	TDP1	0.0278026	0.305829		7	39	0.179487	-	-	-		-	0	dbSNP:rs200071764
ENSG00000148840	PPRC1	0.0278783	0.306232		18	39	0.461538	-	-	-		-	0	ESP:TMP_ESP_10_103900510,dbSNP:rs140572262
ENSG00000077147	TM9SF3	0.0280817	0.306748		3	39	0.0769231	-	-	-	T	-	0
ENSG00000160255	ITGB2	0.0280441	0.306748		10	39	0.25641	-	-	-		-	0	ESP:TMP_ESP_21_46320240,ESP:TMP_ESP_21_46354912
ENSG00000147124	ZNF41	0.0280419	0.306748		4	39	0.102564	-	-	-	T	-	0
ENSG00000132275	RRP8	0.027975	0.306748		3	39	0.0769231	-	-	-	T	-	0
ENSG00000129472	RAB2B	0.0283632	0.309392		2	39	0.0512821	-	-	-	T	-	0
ENSG00000141425	RPRD1A	0.0284956	0.310075		5	39	0.128205	-	-	-	T	-	0
ENSG00000204991	SPIRE2	0.0285049	0.310075		9	39	0.230769	-	-	-	T	-	0	dbSNP:rs145719560
ENSG00000164961	KIAA0196	0.0288191	0.312626		9	39	0.230769	-	-	-	T	-	0	ESP:TMP_ESP_8_126095434
ENSG00000239382	ALKBH6	0.028819	0.312626		8	39	0.205128	-	-	-	T	-	0	ESP:TMP_ESP_19_36496253
ENSG00000141504	SAT2	0.0288613	0.312651		14	39	0.358974	-	-	-	T	-	0
ENSG00000129083	COPB1	0.0289534	0.313215		4	39	0.102564	-	-	-	T	-	0
ENSG00000134627	PIWIL4	0.0291166	0.313611		12	39	0.307692	-	-	-	N	-	0
ENSG00000184432	COPB2	0.0291397	0.313611		7	39	0.179487	-	-	-	T	-	0
ENSG00000204577	LILRB3	0.0291498	0.313611		17	39	0.435897	-	-	-		-	0	COSMIC:COSM261775,COSMIC:COSM261776,ESP:TMP_ESP_19_54744915,ESP:TMP_ESP_19_54744933
ENSG00000164609	SLU7	0.0290755	0.313611		4	39	0.102564	-	-	-	T	-	0	dbSNP:rs200339405
ENSG00000169871	TRIM56	0.0293942	0.315435		4	39	0.102564	-	-	-	T	-	0
ENSG00000115966	ATF2	0.0293999	0.315435		7	39	0.179487	-	-	-	T	-	0
ENSG00000164402	2014-09-08	0.0294605	0.315654		10	39	0.25641	-	-	-	T	-	0	ESP:TMP_ESP_5_132098353
ENSG00000143952	VPS54	0.0297719	0.318216		13	39	0.333333	-	-	-		-	0	ESP:TMP_ESP_2_64161179
ENSG00000174197	MGA	0.0297808	0.318216		16	39	0.410256	-	-	-		-	0
ENSG00000125966	MMP24	0.0299512	0.319492		11	39	0.282051	-	-	-		-	0	dbSNP:rs140648293
ENSG00000167862	ICT1	0.0299816	0.319492		6	39	0.153846	-	-	-	T	-	0
ENSG00000148154	UGCG	0.0300591	0.319653		5	39	0.128205	-	-	-	T	-	0
ENSG00000140265	ZSCAN29	0.0300783	0.319653		6	39	0.153846	-	-	-		-	0
ENSG00000125991	ERGIC3	0.0301552	0.320037		12	39	0.307692	-	-	-	T	-	0	ESP:TMP_ESP_20_34136242
ENSG00000163605	PPP4R2	0.0302179	0.320269		6	39	0.153846	-	-	-	T	-	0
ENSG00000116299	KIAA1324	0.0303134	0.320494		11	39	0.282051	-	-	-	T	-	0	dbSNP:rs112853301,dbSNP:rs150302820
ENSG00000055609	MLL3	0.0303617	0.320494		24	39	0.615385	-	-	-		-	1	COSMIC:COSM124457,COSMIC:COSM124458,COSMIC:COSM245709,COSMIC:COSM245710
ENSG00000104381	GDAP1	0.0303351	0.320494		7	39	0.179487	-	-	-	T	-	0
ENSG00000153975	ZUFSP	0.0304472	0.320964		6	39	0.153846	-	-	-	T	-	0
ENSG00000084112	SSH1	0.030532	0.321011		7	39	0.179487	-	-	-	T	-	0
ENSG00000137760	ALKBH8	0.0305337	0.321011		5	39	0.128205	-	-	-	T	-	0
ENSG00000204301	NOTCH4	0.0305744	0.321011		16	39	0.410256	-	-	-		-	0	dbSNP:rs146490163,dbSNP:rs148269570,dbSNP:rs184540431
ENSG00000136754	ABI1	0.0306452	0.321324		2	39	0.0512821	-	-	-	T	-	0
ENSG00000184678	HIST2H2BE	0.0307787	0.322293		15	39	0.384615	-	-	-	T	-	0
ENSG00000108622	ICAM2	0.0311468	0.325712		7	39	0.179487	-	-	-	T	-	0
ENSG00000150527	CTAGE5	0.0312632	0.326495		12	39	0.307692	-	-	-		-	0
ENSG00000188389	PDCD1	0.0315001	0.328531		11	39	0.282051	-	-	-		-	0
ENSG00000107614	TRDMT1	0.0316457	0.32923		9	39	0.230769	-	-	-	T	-	0	dbSNP:rs146125562
ENSG00000110076	NRXN2	0.031735	0.32923		19	39	0.487179	-	-	-		-	0
ENSG00000168397	ATG4B	0.0316882	0.32923		11	39	0.282051	-	-	-		-	0
ENSG00000139880	CDH24	0.0316931	0.32923		12	39	0.307692	-	-	-		-	0	ESP:TMP_ESP_14_23518952
ENSG00000113522	RAD50	0.0318144	0.329617		6	39	0.153846	-	-	-	T	-	0	ESP:TMP_ESP_5_131911515
ENSG00000151743	AMN1	0.0319161	0.3298		7	39	0.179487	-	-	-	T	-	0
ENSG00000064933	PMS1	0.0318953	0.3298		6	39	0.153846	-	-	-	T	-	0
ENSG00000055917	PUM2	0.0320362	0.330605		9	39	0.230769	-	-	-	T	-	0
ENSG00000196189	SEMA4A	0.0323189	0.33091		13	39	0.333333	-	-	-	T	-	0	dbSNP:rs199654825
ENSG00000151748	SAV1	0.0323109	0.33091		5	39	0.128205	-	-	-	T	-	0	dbSNP:rs149657007
ENSG00000144306	SCRN3	0.0323167	0.33091		6	39	0.153846	-	-	-	T	-	0
ENSG00000078177	N4BP2	0.0322992	0.33091		12	39	0.307692	-	-	-		-	0
ENSG00000006453	BAIAP2L1	0.0322292	0.33091		8	39	0.205128	-	-	-	T	-	0
ENSG00000104133	SPG11	0.0322025	0.33091		14	39	0.358974	-	-	-		-	0	COSMIC:COSM129395,dbSNP:rs141106870
ENSG00000154889	MPPE1	0.0323845	0.33115		4	39	0.102564	-	-	-	T	-	0	dbSNP:rs138699115
ENSG00000135250	SRPK2	0.0325197	0.332099		8	39	0.205128	-	-	-	T	-	0
ENSG00000148019	CEP78	0.0326191	0.332249		8	39	0.205128	-	-	-	T	-	0
ENSG00000146731	CCT6A	0.0325961	0.332249		8	39	0.205128	-	-	-	T	-	0	ESP:TMP_ESP_7_56128490
ENSG00000161217	PCYT1A	0.0327901	0.333206		15	39	0.384615	-	-	-	T	-	0	COSMIC:COSM171043,dbSNP:rs140398033
ENSG00000137343	ATAT1	0.032798	0.333206		13	39	0.333333	-	-	-	T	-	0	dbSNP:rs149132710
ENSG00000114650	SCAP	0.0329855	0.333383		13	39	0.333333	-	-	-	N	-	0	ESP:TMP_ESP_3_47459848
ENSG00000089351	GRAMD1A	0.0329665	0.333383		12	39	0.307692	2.56721	0.00512607	0.0111842		[404,404]:2	0
ENSG00000111321	LTBR	0.0329261	0.333383		7	39	0.179487	-	-	-	T	-	0
ENSG00000135299	ANKRD6	0.0329277	0.333383		7	39	0.179487	-	-	-	T	-	0
ENSG00000100902	PSMA6	0.0331018	0.334128		5	39	0.128205	-	-	-	T	-	0
ENSG00000012963	UBR7	0.0331476	0.33416		4	39	0.102564	-	-	-	T	-	0
ENSG00000198887	SMC5	0.0334407	0.336683		11	39	0.282051	-	-	-	N	-	0
ENSG00000197008	ZNF138	0.0337205	0.339064		4	39	0.102564	-	-	-	T	-	0	ESP:TMP_ESP_7_64291840
ENSG00000063854	HAGH	0.0338859	0.340291		10	39	0.25641	-	-	-	T	-	0
ENSG00000153814	JAZF1	0.0341003	0.342006		10	39	0.25641	-	-	-	T	-	0
ENSG00000177156	TALDO1	0.034149	0.342057		2	39	0.0512821	-	-	-	T	-	0
ENSG00000136636	KCTD3	0.0342246	0.342377		8	39	0.205128	-	-	-	T	-	0	ESP:TMP_ESP_1_215760032
ENSG00000127616	SMARCA4	0.0343874	0.343567		16	39	0.410256	-	-	-		-	1	COSMIC:COSM263763,ESP:TMP_ESP_19_11144213,dbSNP:rs200658539
ENSG00000187522	HSPA14	0.0344933	0.344187		6	39	0.153846	-	-	-	T	-	0
ENSG00000163513	TGFBR2	0.0345786	0.3446		6	39	0.153846	-	-	-	T	-	1	COSMIC:COSM20398,dbSNP:rs104893819
ENSG00000134897	BIVM	0.0346702	0.345062		5	39	0.128205	-	-	-	T	-	0
ENSG00000173218	VANGL1	0.034713	0.345062		8	39	0.205128	-	-	-	T	-	0
ENSG00000138722	MMRN1	0.0348714	0.34576		10	39	0.25641	-	-	-		-	0
ENSG00000161405	IKZF3	0.0348639	0.34576		12	39	0.307692	-	-	-		-	0
ENSG00000154760	SLFN13	0.0350374	0.346967		10	39	0.25641	1.39545	0.0814397	0.0977277		[207,207]:2	0
ENSG00000138172	CALHM2	0.0351837	0.347977		8	39	0.205128	-	-	-	T	-	0
ENSG00000145332	KLHL8	0.035551	0.350285		5	39	0.128205	-	-	-	T	-	0
ENSG00000048028	USP28	0.0355309	0.350285		10	39	0.25641	-	-	-		-	0
ENSG00000130818	ZNF426	0.0355114	0.350285		4	39	0.102564	-	-	-	T	-	0	dbSNP:rs150825421
ENSG00000132906	CASP9	0.035664	0.350957		10	39	0.25641	-	-	-	T	-	0
ENSG00000085831	TTC39A	0.0359296	0.353128		16	39	0.410256	-	-	-		-	0
ENSG00000133392	MYH11	0.0360075	0.353451		19	39	0.487179	-	-	-		-	0	dbSNP:rs151337580
ENSG00000108799	EZH1	0.0360724	0.353645		13	39	0.333333	-	-	-		-	0
ENSG00000184990	SIVA1	0.036233	0.354776		6	39	0.153846	-	-	-	T	-	0
ENSG00000136247	ZDHHC4	0.0363726	0.355699		8	39	0.205128	-	-	-	T	-	0
ENSG00000144591	GMPPA	0.0364428	0.355764		8	39	0.205128	-	-	-	T	-	0
ENSG00000211456	SACM1L	0.03647	0.355764		3	39	0.0769231	-	-	-	T	-	0
ENSG00000141574	SECTM1	0.0366324	0.356044		9	39	0.230769	-	-	-	T	-	0
ENSG00000118217	ATF6	0.0365601	0.356044		7	39	0.179487	-	-	-		-	0	COSMIC:COSM106876,dbSNP:rs141227581,dbSNP:rs146640460
ENSG00000113407	TARS	0.0366743	0.356044		7	39	0.179487	-	-	-		-	0	dbSNP:rs200221822
ENSG00000213020	ZNF611	0.0366803	0.356044		4	39	0.102564	-	-	-	T	-	0
ENSG00000187742	SECISBP2	0.0370134	0.358833		7	39	0.179487	-	-	-		-	0	ESP:TMP_ESP_9_91978467
ENSG00000187736	NHEJ1	0.0373734	0.361876		7	39	0.179487	-	-	-	T	-	0
ENSG00000142156	COL6A1	0.0374358	0.362033		13	39	0.333333	-	-	-	N	-	0	ESP:TMP_ESP_21_47412145,dbSNP:rs7283817
ENSG00000162402	USP24	0.0376255	0.362972		19	39	0.487179	-	-	-		-	0
ENSG00000108852	MPP2	0.0375899	0.362972		10	39	0.25641	2.56721	0.00512607	0.0111842		[290,290]:2	0	ESP:TMP_ESP_17_41956706
ENSG00000100385	IL2RB	0.0377509	0.363289		9	39	0.230769	-	-	-		-	0
ENSG00000080986	NDC80	0.0377237	0.363289		6	39	0.153846	-	-	-	T	-	0
ENSG00000077463	SIRT6	0.0378	0.363316		14	39	0.358974	-	-	-	T	-	0	dbSNP:rs200860440,dbSNP:rs201984712
ENSG00000171262	FAM98B	0.0379024	0.363854		4	39	0.102564	-	-	-	T	-	0	dbSNP:rs201983734
ENSG00000198431	TXNRD1	0.0379561	0.363924		8	39	0.205128	-	-	-	T	-	0
ENSG00000100731	PCNX	0.0380131	0.364025		18	39	0.461538	-	-	-		-	0	ESP:TMP_ESP_14_71576247
ENSG00000065060	UHRF1BP1	0.0381283	0.364398		12	39	0.307692	-	-	-	T	-	0
ENSG00000104064	GABPB1	0.0381449	0.364398		6	39	0.153846	-	-	-	T	-	0
ENSG00000247596	TWF2	0.0385849	0.367407		6	39	0.153846	-	-	-	T	-	0	dbSNP:rs200596305
ENSG00000143514	TP53BP2	0.0386005	0.367407		11	39	0.282051	-	-	-		-	0	ESP:TMP_ESP_1_223986164
ENSG00000151062	CACNA2D4	0.0385683	0.367407		21	39	0.538462	1.59074	0.0558335	0.0724326		[663,663]:2	0	ESP:TMP_ESP_12_1963229,ESP:TMP_ESP_12_1989037,ESP:TMP_ESP_12_2019061,ESP:TMP_ESP_12_2024144,dbSNP:rs143417942,dbSNP:rs201110560
ENSG00000142186	SCYL1	0.0390077	0.368519		12	39	0.307692	-	-	-	T	-	0	dbSNP:rs149115544
ENSG00000125637	PSD4	0.0388718	0.368519		8	39	0.205128	-	-	-	T	-	0
ENSG00000151914	DST	0.0390598	0.368519		27	39	0.692308	-	-	-		-	1	dbSNP:rs143795444,dbSNP:rs146858008
ENSG00000126247	CAPNS1	0.0390932	0.368519		14	39	0.358974	-	-	-	T	-	0	dbSNP:rs201667084
ENSG00000242247	ARFGAP3	0.0389597	0.368519		6	39	0.153846	-	-	-	T	-	0
ENSG00000161638	ITGA5	0.0388498	0.368519		14	39	0.358974	-	-	-		-	0
ENSG00000114686	MRPL3	0.0390118	0.368519		6	39	0.153846	-	-	-	T	-	0
ENSG00000075188	NUP37	0.0388643	0.368519		4	39	0.102564	-	-	-	T	-	0
ENSG00000116128	BCL9	0.0392098	0.368732		13	39	0.333333	-	-	-		-	0	dbSNP:rs148150708
ENSG00000184588	PDE4B	0.0392013	0.368732		10	39	0.25641	-	-	-	T	-	0
ENSG00000026025	VIM	0.039349	0.369598		11	39	0.282051	3.60291	0.000157337	0.00280722		[238,239]:3	0
ENSG00000114796	KLHL24	0.0394431	0.370039		6	39	0.153846	-	-	-	T	-	0
ENSG00000086475	SEPHS1	0.0396115	0.370343		8	39	0.205128	-	-	-		-	0
ENSG00000171291	ZNF439	0.0396172	0.370343		11	39	0.282051	4.03191	2.76625e-05	0.000663933		[396,398]:4	0	dbSNP:rs149419820
ENSG00000174080	CTSF	0.0395953	0.370343		14	39	0.358974	-	-	-	T	-	0	ESP:TMP_ESP_11_66334667
ENSG00000108950	FAM20A	0.0398487	0.372063		7	39	0.179487	-	-	-	T	-	0	dbSNP:rs113720162,dbSNP:rs146383819,dbSNP:rs200599944
ENSG00000127870	RNF6	0.0400307	0.373319		2	39	0.0512821	-	-	-	T	-	0
ENSG00000154310	TNIK	0.0401268	0.373327		23	39	0.589744	-	-	-		-	0	ESP:TMP_ESP_3_170802010
ENSG00000163558	PRKCI	0.0401268	0.373327		12	39	0.307692	-	-	-	T	-	0	dbSNP:rs187556905
ENSG00000116191	RALGPS2	0.0402148	0.373355		10	39	0.25641	-	-	-		-	0
ENSG00000162869	PPP1R21	0.0402251	0.373355		6	39	0.153846	-	-	-	T	-	0	ESP:TMP_ESP_2_48707205
ENSG00000167555	ZNF528	0.0403504	0.374076		7	39	0.179487	2.56721	0.00512607	0.0111842		[487,487]:2	0
ENSG00000005810	MYCBP2	0.0404305	0.374376		21	39	0.538462	-	-	-		-	1	ESP:TMP_ESP_13_77780778
ENSG00000140678	ITGAX	0.0407242	0.376651		20	39	0.512821	-	-	-		-	0	ESP:TMP_ESP_16_31373439,dbSNP:rs201384441
ENSG00000139163	ETNK1	0.0409049	0.377876		8	39	0.205128	-	-	-	T	-	0
ENSG00000138190	EXOC6	0.0411033	0.379263		6	39	0.153846	-	-	-	T	-	0
ENSG00000010810	FYN	0.0411552	0.379296		12	39	0.307692	-	-	-		-	0	COSMIC:COSM216729,COSMIC:COSM281268,dbSNP:rs146847612
ENSG00000100453	GZMB	0.0412517	0.379738		8	39	0.205128	-	-	-		-	0
ENSG00000108556	CHRNE	0.0414739	0.380895		8	39	0.205128	-	-	-	T	-	0	dbSNP:rs143928868
ENSG00000187741	FANCA	0.0414745	0.380895		15	39	0.384615	-	-	-		-	0
ENSG00000084676	NCOA1	0.0417266	0.382762		12	39	0.307692	-	-	-		-	0	dbSNP:rs145995261
ENSG00000162692	VCAM1	0.0422929	0.383283		16	39	0.410256	1.39545	0.0814397	0.0977277		[458,458]:2	0	COSMIC:COSM40743,ESP:TMP_ESP_1_101185376,dbSNP:rs149304647
ENSG00000153317	ASAP1	0.0423526	0.383283		8	39	0.205128	-	-	-		-	0
ENSG00000241978	AKAP2	0.0421269	0.383283		16	39	0.410256	1.39545	0.0814397	0.0977277		[452,452]:2	0	dbSNP:rs200678539
ENSG00000167220	HDHD2	0.0423698	0.383283		2	39	0.0512821	-	-	-	T	-	0
ENSG00000101654	RNMT	0.042078	0.383283		7	39	0.179487	-	-	-	T	-	0	COSMIC:COSM135784
ENSG00000084774	CAD	0.0421327	0.383283		19	39	0.487179	1.83486	0.0332632	0.0498948		[391,391]:2	1	ESP:TMP_ESP_2_27466377,dbSNP:rs141524329,dbSNP:rs75891236
ENSG00000181450	ZNF678	0.0423359	0.383283		6	39	0.153846	-	-	-		-	0
ENSG00000106266	SNX8	0.0422611	0.383283		10	39	0.25641	-	-	-	N	-	0
ENSG00000099864	PALM	0.0418352	0.383283		8	39	0.205128	-	-	-	T	-	0
ENSG00000133247	SUV420H2	0.0421107	0.383283		5	39	0.128205	-	-	-	T	-	0	ESP:TMP_ESP_19_55857669
ENSG00000070831	CDC42	0.042332	0.383283		3	39	0.0769231	-	-	-	T	-	0
ENSG00000108479	GALK1	0.0422858	0.383283		8	39	0.205128	-	-	-	T	-	0
ENSG00000197555	SIPA1L1	0.0425502	0.384029		13	39	0.333333	-	-	-		-	0
ENSG00000136205	TNS3	0.0425101	0.384029		18	39	0.461538	-	-	-		-	0	ESP:TMP_ESP_7_47408414
ENSG00000100365	NCF4	0.0428631	0.385965		7	39	0.179487	-	-	-	T	-	0	dbSNP:rs200966942
ENSG00000124788	ATXN1	0.0428409	0.385965		9	39	0.230769	-	-	-		-	0
ENSG00000102763	VWA8	0.0432736	0.388492		15	39	0.384615	-	-	-		-	0	ESP:TMP_ESP_13_42259174,ESP:TMP_ESP_13_42390816
ENSG00000175567	UCP2	0.0433553	0.388492		6	39	0.153846	-	-	-	T	-	0
ENSG00000132470	ITGB4	0.0434138	0.388492		17	39	0.435897	-	-	-		-	0	dbSNP:rs116499149
ENSG00000177380	PPFIA3	0.0433373	0.388492		21	39	0.538462	-	-	-		-	0	COSMIC:COSM191716,dbSNP:rs10416939,dbSNP:rs141909804,dbSNP:rs56795135
ENSG00000150768	DLAT	0.043441	0.388492		6	39	0.153846	-	-	-	T	-	0
ENSG00000177239	MAN1B1	0.0432546	0.388492		14	39	0.358974	-	-	-		-	0	dbSNP:rs200676067
ENSG00000135679	MDM2	0.0436958	0.389439		4	39	0.102564	-	-	-	T	-	0	dbSNP:rs188877276
ENSG00000138193	PLCE1	0.0436816	0.389439		25	39	0.641026	0.671722	0.25088	0.255133		[1443,1443]:2	0	COSMIC:COSM139850,COSMIC:COSM222187,ESP:TMP_ESP_10_95994090,ESP:TMP_ESP_10_96013906,dbSNP:rs199906617
ENSG00000196083	IL1RAP	0.0436633	0.389439		8	39	0.205128	-	-	-	T	-	0	dbSNP:rs201536453
ENSG00000083896	YTHDC1	0.0442729	0.394134		6	39	0.153846	-	-	-	T	-	0
ENSG00000131437	KIF3A	0.0445304	0.395977		10	39	0.25641	3.15308	0.000807776	0.00285098		[206,206]:2	0	COSMIC:COSM225857,COSMIC:COSM225858
ENSG00000100209	HSCB	0.0449462	0.399036		4	39	0.102564	-	-	-	T	-	0
ENSG00000164258	NDUFS4	0.0450063	0.399036		4	39	0.102564	-	-	-	T	-	0
ENSG00000144736	SHQ1	0.045027	0.399036		5	39	0.128205	-	-	-	T	-	0
ENSG00000113296	THBS4	0.0453006	0.401007		16	39	0.410256	-	-	-		-	0
ENSG00000006125	AP2B1	0.0453558	0.401044		9	39	0.230769	-	-	-	T	-	0
ENSG00000088992	TESC	0.0456661	0.401559		9	39	0.230769	-	-	-	T	-	0
ENSG00000164603	C7orf60	0.0455752	0.401559		5	39	0.128205	-	-	-	N	-	0	COSMIC:COSM252398
ENSG00000170954	ZNF415	0.0456506	0.401559		10	39	0.25641	-	-	-		-	0	COSMIC:COSM192890,dbSNP:rs199811601
ENSG00000204344	STK19	0.0457213	0.401559		13	39	0.333333	4.29192	8.8567e-06	0.000303658		[88,89]:4	0	COSMIC:COSM21037,COSMIC:COSM226579,dbSNP:rs201442394
ENSG00000111859	NEDD9	0.0456525	0.401559		7	39	0.179487	-	-	-	T	-	0
ENSG00000167535	CACNB3	0.0456852	0.401559		9	39	0.230769	-	-	-	T	-	0
ENSG00000160613	PCSK7	0.0458802	0.402259		8	39	0.205128	-	-	-	T	-	0
ENSG00000051825	MPHOSPH9	0.0459035	0.402259		7	39	0.179487	-	-	-	T	-	0
ENSG00000110046	ATG2A	0.0461036	0.402952		19	39	0.487179	-	-	-		-	0	COSMIC:COSM194101,ESP:TMP_ESP_11_64669629
ENSG00000131876	SNRPA1	0.0461368	0.402952		4	39	0.102564	-	-	-	T	-	0
ENSG00000087502	ERGIC2	0.046078	0.402952		7	39	0.179487	-	-	-	T	-	0
ENSG00000171497	PPID	0.0466679	0.407138		3	39	0.0769231	-	-	-	T	-	0	ESP:TMP_ESP_4_159630839,dbSNP:rs148824218
ENSG00000124198	ARFGEF2	0.0469061	0.40876		12	39	0.307692	-	-	-		-	0
ENSG00000121879	PIK3CA	0.0469906	0.409043		9	39	0.230769	-	-	-	T	-	1
ENSG00000213999	MEF2B	0.0476478	0.409854		7	39	0.179487	-	-	-	T	-	0
ENSG00000142327	RNPEPL1	0.0476249	0.409854		4	39	0.102564	-	-	-	T	-	0	dbSNP:rs139059683
ENSG00000117009	KMO	0.0480946	0.409854		13	39	0.333333	3.59251	0.000163755	0.00280722		[200,204]:3	0	ESP:TMP_ESP_1_241725627
ENSG00000074706	IPCEF1	0.0480414	0.409854		8	39	0.205128	-	-	-	T	-	0
ENSG00000175115	PACS1	0.0481335	0.409854		16	39	0.410256	-	-	-		-	0	dbSNP:rs144180500
ENSG00000143157	POGK	0.0476232	0.409854		3	39	0.0769231	-	-	-	T	-	0
ENSG00000129566	TEP1	0.0474962	0.409854		21	39	0.538462	-	-	-		-	0	ESP:TMP_ESP_14_20863571,dbSNP:rs146530626,dbSNP:rs150739818,dbSNP:rs151082585,dbSNP:rs200437004
ENSG00000130935	NOL11	0.0472806	0.409854		8	39	0.205128	-	-	-		-	0
ENSG00000047621	C12orf4	0.0479505	0.409854		5	39	0.128205	-	-	-	T	-	0
ENSG00000092421	SEMA6A	0.0481338	0.409854		11	39	0.282051	-	-	-		-	0
ENSG00000095564	BTAF1	0.0476453	0.409854		10	39	0.25641	-	-	-	T	-	1
ENSG00000091490	SEL1L3	0.0482527	0.409854		17	39	0.435897	-	-	-		-	0
ENSG00000169957	ZNF768	0.0482318	0.409854		4	39	0.102564	-	-	-	T	-	0
ENSG00000108821	COL1A1	0.0481383	0.409854		21	39	0.538462	-	-	-		-	0	COSMIC:COSM140139,ESP:TMP_ESP_17_48267969,dbSNP:rs145446512,dbSNP:rs41316691,dbSNP:rs72654799,dbSNP:rs72656315
ENSG00000188706	ZDHHC9	0.0474515	0.409854		5	39	0.128205	-	-	-	T	-	0
ENSG00000029363	BCLAF1	0.0473968	0.409854		12	39	0.307692	-	-	-		-	0	COSMIC:COSM223123
ENSG00000111716	LDHB	0.0479586	0.409854		3	39	0.0769231	-	-	-	T	-	0
ENSG00000197943	PLCG2	0.0472263	0.409854		18	39	0.461538	-	-	-		-	0	ESP:TMP_ESP_16_81902941
ENSG00000136891	TEX10	0.0482857	0.409854		4	39	0.102564	-	-	-	T	-	0
ENSG00000120820	GLT8D2	0.0482405	0.409854		9	39	0.230769	-	-	-	T	-	0
ENSG00000105085	MED26	0.0478053	0.409854		4	39	0.102564	-	-	-	T	-	0	ESP:TMP_ESP_19_16686911
ENSG00000011454	RABGAP1	0.0481269	0.409854		8	39	0.205128	-	-	-	T	-	0
ENSG00000125484	GTF3C4	0.048104	0.409854		6	39	0.153846	-	-	-	T	-	0
ENSG00000047457	CP	0.0484172	0.410526		18	39	0.461538	-	-	-		-	0
ENSG00000196576	PLXNB2	0.0485711	0.411386		14	39	0.358974	1.59074	0.0558335	0.0724326		[1559,1559]:2	0	ESP:TMP_ESP_22_50715182,ESP:TMP_ESP_22_50720047,dbSNP:rs149855949
ENSG00000141506	PIK3R5	0.0486319	0.411456		12	39	0.307692	-	-	-		-	0	dbSNP:rs201281083
ENSG00000103249	CLCN7	0.0487869	0.412323		17	39	0.435897	-	-	-		-	0
ENSG00000157625	TAB3	0.0492324	0.41564		4	39	0.102564	-	-	-	T	-	0
ENSG00000218891	ZNF579	0.0493574	0.416247		4	39	0.102564	-	-	-	T	-	0	dbSNP:rs148396831
ENSG00000139133	ALG10	0.049641	0.41819		3	39	0.0769231	-	-	-	T	-	0
ENSG00000154710	RABGEF1	0.0498943	0.418807		3	39	0.0769231	-	-	-	T	-	0
ENSG00000151846	PABPC3	0.0497816	0.418807		10	39	0.25641	-	-	-	T	-	1	COSMIC:COSM233036
ENSG00000102786	INTS6	0.0500152	0.418807		8	39	0.205128	-	-	-	T	-	0
ENSG00000167779	IGFBP6	0.0499847	0.418807		7	39	0.179487	-	-	-	T	-	0
ENSG00000161960	EIF4A1	0.0500347	0.418807		10	39	0.25641	-	-	-	T	-	0	dbSNP:rs77471966
ENSG00000131626	PPFIA1	0.0499077	0.418807		11	39	0.282051	3.15308	0.000807776	0.00285098		[741,741]:2	0	ESP:TMP_ESP_11_70200491,dbSNP:rs187027607
ENSG00000185220	PGBD2	0.0501178	0.419055		7	39	0.179487	-	-	-	T	-	0
ENSG00000108256	NUFIP2	0.0509866	0.41961		4	39	0.102564	-	-	-	T	-	0
ENSG00000186566	GPATCH8	0.0505695	0.41961		11	39	0.282051	-	-	-		-	0
ENSG00000125846	ZNF133	0.0509744	0.41961		3	39	0.0769231	-	-	-	T	-	0
ENSG00000010539	ZNF200	0.0505734	0.41961		7	39	0.179487	-	-	-		-	0
ENSG00000106144	CASP2	0.0504778	0.41961		14	39	0.358974	-	-	-		-	0
ENSG00000104889	RNASEH2A	0.0508549	0.41961		4	39	0.102564	-	-	-	T	-	0	dbSNP:rs142642923
ENSG00000065491	TBC1D22B	0.0507101	0.41961		6	39	0.153846	-	-	-	T	-	0
ENSG00000116679	IVNS1ABP	0.0506787	0.41961		7	39	0.179487	-	-	-		-	0
ENSG00000175073	VCPIP1	0.0502427	0.41961		4	39	0.102564	-	-	-	T	-	0
ENSG00000107864	CPEB3	0.050518	0.41961		6	39	0.153846	-	-	-	T	-	0
ENSG00000117461	PIK3R3	0.0508644	0.41961		6	39	0.153846	-	-	-	T	-	0
ENSG00000163125	RPRD2	0.0506728	0.41961		15	39	0.384615	-	-	-		-	0
ENSG00000047346	FAM214A	0.0509234	0.41961		5	39	0.128205	-	-	-	T	-	0
ENSG00000160050	CCDC28B	0.0509154	0.41961		14	39	0.358974	-	-	-	T	-	0
ENSG00000197121	PGAP1	0.0506589	0.41961		12	39	0.307692	-	-	-	T	-	0
ENSG00000006837	CDKL3	0.0512293	0.421165		6	39	0.153846	-	-	-	T	-	0
ENSG00000113593	PPWD1	0.0514943	0.421576		6	39	0.153846	-	-	-	T	-	0
ENSG00000116698	SMG7	0.0514625	0.421576		17	39	0.435897	-	-	-		-	0
ENSG00000158301	GPRASP2	0.0514234	0.421576		5	39	0.128205	-	-	-	N	-	0
ENSG00000145833	DDX46	0.0514558	0.421576		13	39	0.333333	-	-	-		-	0	COSMIC:COSM280342
ENSG00000049323	LTBP1	0.0517098	0.421688		20	39	0.512821	-	-	-		-	1	ESP:TMP_ESP_2_33585833,dbSNP:rs61751740
ENSG00000079999	KEAP1	0.051723	0.421688		3	39	0.0769231	-	-	-	T	-	1
ENSG00000173960	UBXN2A	0.0516166	0.421688		5	39	0.128205	-	-	-	T	-	0
ENSG00000136270	TBRG4	0.0515762	0.421688		4	39	0.102564	-	-	-	T	-	0
ENSG00000180104	EXOC3	0.051841	0.422211		10	39	0.25641	-	-	-	N	-	0	ESP:TMP_ESP_5_453513
ENSG00000152520	PAN3	0.0519417	0.422592		9	39	0.230769	-	-	-	T	-	0	dbSNP:rs139494056
ENSG00000114354	TFG	0.0520885	0.423284		4	39	0.102564	-	-	-	T	-	0
ENSG00000158480	SPATA2	0.0521347	0.423284		7	39	0.179487	-	-	-		-	0
ENSG00000137449	CPEB2	0.0521979	0.423359		7	39	0.179487	-	-	-		-	0
ENSG00000164758	MED30	0.0522751	0.423547		4	39	0.102564	-	-	-	T	-	0	dbSNP:rs200615500
ENSG00000152990	GPR125	0.0523403	0.423638		12	39	0.307692	-	-	-		-	0	ESP:TMP_ESP_4_22422616
ENSG00000197566	ZNF624	0.0525344	0.42477		6	39	0.153846	-	-	-	T	-	0
ENSG00000138246	DNAJC13	0.0527776	0.426297		13	39	0.333333	-	-	-		-	0	dbSNP:rs191677110
ENSG00000184281	TSSC4	0.0528373	0.426341		11	39	0.282051	-	-	-	T	-	0
ENSG00000182093	WRB	0.0530171	0.426977		7	39	0.179487	-	-	-	T	-	0	dbSNP:rs138689773
ENSG00000102900	NUP93	0.0531173	0.426977		11	39	0.282051	-	-	-	T	-	1
ENSG00000007202	KIAA0100	0.0531096	0.426977		18	39	0.461538	-	-	-		-	0	ESP:TMP_ESP_17_26950733,ESP:TMP_ESP_17_26962173,dbSNP:rs138748628,dbSNP:rs143442568,dbSNP:rs202194087
ENSG00000117395	EBNA1BP2	0.0531339	0.426977		19	39	0.487179	4.36149	6.45887e-06	0.000258355		[30,38]:5	0
ENSG00000122550	KLHL7	0.053254	0.427504		5	39	0.128205	-	-	-	T	-	0	dbSNP:rs137853114
ENSG00000164292	RHOBTB3	0.0533363	0.427655		8	39	0.205128	-	-	-	T	-	0	COSMIC:COSM167902,ESP:TMP_ESP_5_95128803
ENSG00000164764	SBSPON	0.0533819	0.427655		3	39	0.0769231	-	-	-	T	-	0
ENSG00000109586	GALNT7	0.0537032	0.429442		6	39	0.153846	-	-	-	T	-	0
ENSG00000115145	STAM2	0.0537145	0.429442		6	39	0.153846	-	-	-	T	-	0
ENSG00000087116	ADAMTS2	0.0541995	0.432123		16	39	0.410256	-	-	-		-	0
ENSG00000174206	C12orf66	0.0541061	0.432123		7	39	0.179487	-	-	-	T	-	0
ENSG00000082781	ITGB5	0.0542151	0.432123		10	39	0.25641	-	-	-	T	-	0
ENSG00000130024	PHF10	0.0545578	0.432845		10	39	0.25641	-	-	-	T	-	0
ENSG00000143164	DCAF6	0.0544041	0.432845		7	39	0.179487	-	-	-	T	-	0
ENSG00000085224	ATRX	0.0546246	0.432845		9	39	0.230769	-	-	-		-	1
ENSG00000104177	MYEF2	0.0546103	0.432845		21	39	0.538462	2.14872	0.0158282	0.028349		[448,448]:2	0	dbSNP:rs112771038,dbSNP:rs138524718
ENSG00000171467	ZNF318	0.054586	0.432845		14	39	0.358974	-	-	-		-	0
ENSG00000171475	WIPF2	0.0546368	0.432845		4	39	0.102564	-	-	-	T	-	0	COSMIC:COSM248346
ENSG00000159346	ADIPOR1	0.0548014	0.433711		7	39	0.179487	-	-	-	T	-	0	dbSNP:rs111719484
ENSG00000117448	AKR1A1	0.0550172	0.43498		5	39	0.128205	-	-	-	T	-	0
ENSG00000004897	CDC27	0.0551511	0.435599		7	39	0.179487	3.15308	0.000807776	0.00285098		[274,274]:2	0	COSMIC:COSM221832,dbSNP:rs199588670
ENSG00000116106	EPHA4	0.0552782	0.435726		11	39	0.282051	-	-	-	T	-	0
ENSG00000172819	RARG	0.0552565	0.435726		7	39	0.179487	-	-	-		-	0
ENSG00000006704	GTF2IRD1	0.0553664	0.435983		15	39	0.384615	2.93338	0.00167647	0.00566693		[585,585]:3	0
ENSG00000162819	BROX	0.0555332	0.436857		6	39	0.153846	-	-	-	T	-	0
ENSG00000204160	ZDHHC18	0.0558859	0.439192		5	39	0.128205	-	-	-	T	-	0	dbSNP:rs142975466
ENSG00000020633	RUNX3	0.0560972	0.440411		6	39	0.153846	-	-	-	T	-	0
ENSG00000198663	C6orf89	0.0562753	0.441367		9	39	0.230769	-	-	-	T	-	0
ENSG00000196418	ZNF124	0.0565106	0.442062		2	39	0.0512821	-	-	-	T	-	0
ENSG00000139116	KIF21A	0.056533	0.442062		16	39	0.410256	-	-	-		-	0
ENSG00000090554	FLT3LG	0.056439	0.442062		10	39	0.25641	-	-	-	T	-	0
ENSG00000146232	NFKBIE	0.0568947	0.444448		8	39	0.205128	-	-	-	N	-	0
ENSG00000176845	METRNL	0.0571114	0.445697		6	39	0.153846	-	-	-	T	-	0
ENSG00000132475	H3F3B	0.0571718	0.445724		6	39	0.153846	-	-	-	T	-	0
ENSG00000114573	ATP6V1A	0.0573208	0.446442		7	39	0.179487	-	-	-	T	-	0
ENSG00000146701	MDH2	0.0579443	0.45056		4	39	0.102564	-	-	-	T	-	0
ENSG00000163214	DHX57	0.0579831	0.45056		14	39	0.358974	-	-	-		-	0	COSMIC:COSM134019
ENSG00000159239	C2orf81	0.0580219	0.45056		11	39	0.282051	3.15308	0.000807776	0.00285098		[57,57]:2	0
ENSG00000143537	ADAM15	0.0580811	0.450574		9	39	0.230769	-	-	-	T	-	0	dbSNP:rs138161806
ENSG00000130844	ZNF331	0.0582198	0.451203		7	39	0.179487	-	-	-		-	0	dbSNP:rs199963956
ENSG00000175455	CCDC14	0.0583833	0.452024		10	39	0.25641	-	-	-		-	0	dbSNP:rs145834079
ENSG00000134030	CTIF	0.0585244	0.452154		9	39	0.230769	2.56721	0.00512607	0.0111842		[107,107]:2	0
ENSG00000154265	ABCA5	0.0586026	0.452154		13	39	0.333333	-	-	-		-	0
ENSG00000198363	ASPH	0.058483	0.452154		13	39	0.333333	-	-	-	T	-	0
ENSG00000071894	CPSF1	0.0586308	0.452154		19	39	0.487179	-	-	-		-	0	ESP:TMP_ESP_8_145626111,dbSNP:rs2291134
ENSG00000214357	NEURL1B	0.0589684	0.453866		5	39	0.128205	-	-	-	T	-	0
ENSG00000010256	UQCRC1	0.0589613	0.453866		8	39	0.205128	-	-	-	T	-	0
ENSG00000133794	ARNTL	0.0593371	0.456255		5	39	0.128205	-	-	-	T	-	0
ENSG00000187609	EXD3	0.0595278	0.456826		20	39	0.512821	-	-	-		-	0
ENSG00000120156	TEK	0.059498	0.456826		17	39	0.435897	-	-	-		-	0
ENSG00000179115	FARSA	0.0596643	0.457427		5	39	0.128205	-	-	-	T	-	0
ENSG00000132294	EFR3A	0.059784	0.457897		11	39	0.282051	-	-	-		-	0
ENSG00000225614	ZNF469	0.06024	0.460939		24	39	0.615385	-	-	-		-	0
ENSG00000162676	GFI1	0.0604169	0.461842		3	39	0.0769231	-	-	-	T	-	0
ENSG00000160877	NACC1	0.0606257	0.462537		11	39	0.282051	-	-	-	T	-	0	ESP:TMP_ESP_19_13248074,ESP:TMP_ESP_19_13256238,dbSNP:rs201327710
ENSG00000134775	FHOD3	0.0605824	0.462537		13	39	0.333333	-	-	-		-	0
ENSG00000071054	MAP4K4	0.0607142	0.462762		15	39	0.384615	-	-	-		-	0
ENSG00000079387	SENP1	0.0607929	0.462912		6	39	0.153846	-	-	-	T	-	0
ENSG00000137710	RDX	0.0608944	0.463234		7	39	0.179487	-	-	-		-	0	COSMIC:COSM227322
ENSG00000107551	RASSF4	0.0611333	0.464456		7	39	0.179487	-	-	-	T	-	0	dbSNP:rs145503557
ENSG00000221866	PLXNA4	0.0611734	0.464456		24	39	0.615385	-	-	-		-	0	ESP:TMP_ESP_7_131817769,dbSNP:rs200254516
ENSG00000166262	FAM227B	0.0613042	0.464653		7	39	0.179487	-	-	-		-	0	ESP:TMP_ESP_15_49833942
ENSG00000173230	GOLGB1	0.0613178	0.464653		18	39	0.461538	-	-	-		-	0	ESP:TMP_ESP_3_121377207,ESP:TMP_ESP_3_121395920,dbSNP:rs111927128,dbSNP:rs187467690
ENSG00000107560	RAB11FIP2	0.0614068	0.464712		3	39	0.0769231	-	-	-	T	-	0
ENSG00000182158	CREB3L2	0.0614441	0.464712		8	39	0.205128	-	-	-	T	-	0
ENSG00000204130	RUFY2	0.0616293	0.465663		16	39	0.410256	-	-	-		-	0
ENSG00000167637	ZNF283	0.0616938	0.465702		3	39	0.0769231	-	-	-	T	-	0
ENSG00000143257	NR1I3	0.0618138	0.46616		11	39	0.282051	-	-	-	T	-	0	ESP:TMP_ESP_1_161202571
ENSG00000111725	PRKAB1	0.0618938	0.466314		4	39	0.102564	-	-	-	T	-	0
ENSG00000082641	NFE2L1	0.0624073	0.468639		2	39	0.0512821	-	-	-	T	-	0
ENSG00000141384	TAF4B	0.0624414	0.468639		2	39	0.0512821	-	-	-	T	-	0
ENSG00000129450	SIGLEC9	0.0623041	0.468639		7	39	0.179487	-	-	-	T	-	0
ENSG00000124201	ZNFX1	0.0623573	0.468639		11	39	0.282051	-	-	-		-	0
ENSG00000123684	LPGAT1	0.0626013	0.46939		4	39	0.102564	-	-	-	T	-	0
ENSG00000137815	RTF1	0.0626803	0.469534		11	39	0.282051	-	-	-		-	1
ENSG00000159674	SPON2	0.0627825	0.46985		8	39	0.205128	-	-	-	T	-	0
ENSG00000189298	ZKSCAN3	0.0630966	0.470853		4	39	0.102564	-	-	-	T	-	0
ENSG00000145632	PLK2	0.0630146	0.470853		4	39	0.102564	-	-	-	T	-	0
ENSG00000165659	DACH1	0.0630467	0.470853		11	39	0.282051	-	-	-		-	0
ENSG00000168175	MAPK1IP1L	0.0632086	0.47124		7	39	0.179487	-	-	-	T	-	0
ENSG00000183160	TMEM119	0.0636517	0.473521		8	39	0.205128	2.56721	0.00512607	0.0111842		[262,262]:2	0
ENSG00000125398	SOX9	0.0636598	0.473521		7	39	0.179487	-	-	-		-	1
ENSG00000241697	TMEFF1	0.0636957	0.473521		12	39	0.307692	-	-	-	T	-	0	ESP:TMP_ESP_9_103340554
ENSG00000173334	TRIB1	0.0638737	0.47365		4	39	0.102564	-	-	-	T	-	0	COSMIC:COSM216806,COSMIC:COSM216807,dbSNP:rs200217434
ENSG00000105612	DNASE2	0.0639628	0.47365		7	39	0.179487	-	-	-	T	-	0
ENSG00000103351	CLUAP1	0.0639071	0.47365		6	39	0.153846	-	-	-	T	-	0
ENSG00000184076	UQCR10	0.0637829	0.47365		2	39	0.0512821	-	-	-	T	-	0
ENSG00000183751	TBL3	0.0640149	0.47365		14	39	0.358974	-	-	-	T	-	0
ENSG00000101457	DNTTIP1	0.0644121	0.475691		9	39	0.230769	-	-	-	T	-	0
ENSG00000168016	TRANK1	0.0643541	0.475691		14	39	0.358974	-	-	-		-	0	ESP:TMP_ESP_3_36873161
ENSG00000109814	UGDH	0.0646679	0.477131		5	39	0.128205	-	-	-	T	-	0
ENSG00000153767	GTF2E1	0.0648439	0.47798		5	39	0.128205	-	-	-	T	-	0
ENSG00000138430	OLA1	0.0650071	0.478733		6	39	0.153846	-	-	-	T	-	0
ENSG00000143493	INTS7	0.0652995	0.479985		7	39	0.179487	-	-	-	T	-	0
ENSG00000185684	EP400NL	0.065281	0.479985		6	39	0.153846	-	-	-		-	0
ENSG00000032219	ARID4A	0.0654591	0.480707		9	39	0.230769	-	-	-		-	0
ENSG00000139567	ACVRL1	0.0655521	0.48094		10	39	0.25641	-	-	-	T	-	0
ENSG00000104218	CSPP1	0.0657806	0.482165		12	39	0.307692	-	-	-		-	0	ESP:TMP_ESP_8_68071358
ENSG00000129292	PHF20L1	0.0660259	0.482648		17	39	0.435897	1.39545	0.0814397	0.0977277		[630,630]:2	0	COSMIC:COSM121543,dbSNP:rs148151447,dbSNP:rs199826435
ENSG00000176783	RUFY1	0.066031	0.482648		7	39	0.179487	-	-	-	T	-	0
ENSG00000146463	ZMYM4	0.0659576	0.482648		11	39	0.282051	-	-	-		-	0	dbSNP:rs141164677
ENSG00000139826	ABHD13	0.0663723	0.483823		8	39	0.205128	-	-	-	T	-	0	COSMIC:COSM224455
ENSG00000137474	MYO7A	0.0664204	0.483823		24	39	0.615385	0.989845	0.161125	0.177385		[1069,1069]:2	0	ESP:TMP_ESP_11_76888657
ENSG00000078674	PCM1	0.0663461	0.483823		8	39	0.205128	-	-	-		-	0	ESP:TMP_ESP_8_17808229
ENSG00000123612	ACVR1C	0.0664385	0.483823		10	39	0.25641	-	-	-		-	0
ENSG00000135631	RAB11FIP5	0.0667378	0.485552		4	39	0.102564	-	-	-	T	-	0	dbSNP:rs200972119
ENSG00000128000	ZNF780B	0.0669475	0.486626		13	39	0.333333	-	-	-		-	0	COSMIC:COSM189229,ESP:TMP_ESP_19_40541025
ENSG00000182010	RTKN2	0.0674629	0.489918		8	39	0.205128	-	-	-		-	0
ENSG00000140450	ARRDC4	0.0676383	0.490738		5	39	0.128205	-	-	-	T	-	0
ENSG00000086619	ERO1LB	0.0677693	0.49078		8	39	0.205128	-	-	-	T	-	0	ESP:TMP_ESP_1_236396093
ENSG00000175866	BAIAP2	0.0677547	0.49078		18	39	0.461538	2.56721	0.00512607	0.0111842		[241,241]:2	0	dbSNP:rs8081830
ENSG00000105325	FZR1	0.0678822	0.491144		11	39	0.282051	-	-	-	T	-	0	ESP:TMP_ESP_19_3526936
ENSG00000197299	BLM	0.0686613	0.496323		6	39	0.153846	-	-	-		-	0
ENSG00000156017	C9orf41	0.0688002	0.496869		4	39	0.102564	-	-	-	T	-	0
ENSG00000254772	EEF1G	0.0689251	0.496952		11	39	0.282051	-	-	-	N	-	0	dbSNP:rs148017119
ENSG00000155313	USP25	0.0690651	0.496952		7	39	0.179487	-	-	-	T	-	0
ENSG00000140104	C14orf79	0.0689468	0.496952		6	39	0.153846	-	-	-	T	-	0	COSMIC:COSM200298,ESP:TMP_ESP_14_105478046
ENSG00000044459	CNTLN	0.06902	0.496952		12	39	0.307692	-	-	-		-	0	dbSNP:rs181851213
ENSG00000102580	DNAJC3	0.0695308	0.497473		9	39	0.230769	-	-	-	T	-	0
ENSG00000184831	APOO	0.0695552	0.497473		4	39	0.102564	-	-	-	T	-	0	ESP:TMP_ESP_X_23876796
ENSG00000162496	DHRS3	0.0693828	0.497473		4	39	0.102564	-	-	-	T	-	0
ENSG00000175463	TBC1D10C	0.0693168	0.497473		11	39	0.282051	-	-	-	T	-	0
ENSG00000163904	SENP2	0.0695815	0.497473		7	39	0.179487	-	-	-	T	-	0
ENSG00000105819	PMPCB	0.0695684	0.497473		9	39	0.230769	-	-	-	T	-	0	ESP:TMP_ESP_7_102937894,dbSNP:rs145718159
ENSG00000070770	CSNK2A2	0.0692215	0.497473		3	39	0.0769231	-	-	-	T	-	0
ENSG00000101474	APMAP	0.0697515	0.498234		7	39	0.179487	-	-	-	T	-	0
ENSG00000108848	LUC7L3	0.0698458	0.498454		7	39	0.179487	-	-	-	T	-	0
ENSG00000112118	MCM3	0.0699744	0.498918		7	39	0.179487	-	-	-	T	-	0
ENSG00000172375	C2CD2L	0.0704179	0.501533		8	39	0.205128	-	-	-	N	-	0
ENSG00000135148	TRAFD1	0.0705494	0.501533		3	39	0.0769231	-	-	-	T	-	0
ENSG00000198863	RUNDC1	0.0706126	0.501533		6	39	0.153846	-	-	-	T	-	0	ESP:TMP_ESP_17_41131545,ESP:TMP_ESP_17_41132586
ENSG00000157107	FCHO2	0.0704726	0.501533		11	39	0.282051	-	-	-	T	-	0
ENSG00000131873	CHSY1	0.0706609	0.501533		2	39	0.0512821	-	-	-	T	-	0
ENSG00000146054	TRIM7	0.0708441	0.501925		4	39	0.102564	-	-	-	T	-	0	dbSNP:rs2770945
ENSG00000175193	PARL	0.0707953	0.501925		3	39	0.0769231	-	-	-	T	-	0	dbSNP:rs186520005
ENSG00000174231	PRPF8	0.0709742	0.501939		14	39	0.358974	-	-	-		-	1	ESP:TMP_ESP_17_1578895,dbSNP:rs145114613
ENSG00000130810	PPAN	0.0709408	0.501939		11	39	0.282051	-	-	-	T	-	0
ENSG00000141337	ARSG	0.0710649	0.502128		9	39	0.230769	-	-	-		-	0	dbSNP:rs201281904
ENSG00000173064	HECTD4	0.0712756	0.503163		24	39	0.615385	-	-	-		-	0	ESP:TMP_ESP_12_112610691
ENSG00000118193	KIF14	0.0715412	0.504584		18	39	0.461538	2.56721	0.00512607	0.0111842		[652,652]:2	0
ENSG00000083520	DIS3	0.0718743	0.504664		4	39	0.102564	-	-	-	T	-	0	dbSNP:rs182902184
ENSG00000114861	FOXP1	0.0718365	0.504664		7	39	0.179487	-	-	-	T	-	0
ENSG00000157110	RBPMS	0.0717143	0.504664		5	39	0.128205	-	-	-	T	-	0
ENSG00000125691	RPL23	0.0716492	0.504664		3	39	0.0769231	-	-	-	T	-	0
ENSG00000164742	ADCY1	0.0718177	0.504664		16	39	0.410256	-	-	-		-	0	ESP:TMP_ESP_7_45725619
ENSG00000163106	HPGDS	0.0722946	0.506011		6	39	0.153846	-	-	-	T	-	0
ENSG00000001084	GCLC	0.0723953	0.506011		6	39	0.153846	-	-	-	T	-	0
ENSG00000139146	FAM60A	0.0722341	0.506011		4	39	0.102564	-	-	-	T	-	0
ENSG00000083828	ZNF586	0.072361	0.506011		3	39	0.0769231	-	-	-	T	-	0
ENSG00000115866	DARS	0.0724498	0.506011		7	39	0.179487	-	-	-	T	-	0
ENSG00000087253	LPCAT2	0.0724532	0.506011		12	39	0.307692	2.14872	0.0158282	0.028349		[135,135]:2	0	ESP:TMP_ESP_16_55608652,dbSNP:rs141449615,dbSNP:rs143609573
ENSG00000197329	PELI1	0.0725223	0.506043		2	39	0.0512821	-	-	-	T	-	0
ENSG00000198625	MDM4	0.0726833	0.506716		8	39	0.205128	-	-	-	T	-	0
ENSG00000198795	ZNF521	0.0728089	0.50714		18	39	0.461538	-	-	-		-	0	COSMIC:COSM286900
ENSG00000130940	CASZ1	0.0730646	0.50757		17	39	0.435897	-	-	-		-	0	dbSNP:rs148593753,dbSNP:rs151200081
ENSG00000023191	RNH1	0.0730596	0.50757		6	39	0.153846	-	-	-	T	-	0
ENSG00000120708	TGFBI	0.0730468	0.50757		10	39	0.25641	-	-	-		-	0
ENSG00000128335	APOL2	0.0733428	0.507709		2	39	0.0512821	-	-	-	T	-	0
ENSG00000100106	TRIOBP	0.0734731	0.507709		21	39	0.538462	-	-	-		-	1	COSMIC:COSM168035,COSMIC:COSM168036,dbSNP:rs145115226
ENSG00000153551	CMTM7	0.0733428	0.507709		7	39	0.179487	-	-	-	T	-	0
ENSG00000138778	CENPE	0.0733444	0.507709		14	39	0.358974	-	-	-		-	0
ENSG00000143458	GABPB2	0.073467	0.507709		7	39	0.179487	-	-	-	T	-	0
ENSG00000111785	RIC8B	0.0732278	0.507709		5	39	0.128205	-	-	-	T	-	0
ENSG00000166012	TAF1D	0.0736141	0.508236		9	39	0.230769	-	-	-	T	-	0
ENSG00000105993	DNAJB6	0.0736942	0.508341		3	39	0.0769231	-	-	-	T	-	0
ENSG00000049192	ADAMTS6	0.0737761	0.508459		20	39	0.512821	-	-	-		-	0	COSMIC:COSM233863,COSMIC:COSM233864
ENSG00000197863	ZNF790	0.0743831	0.512192		4	39	0.102564	-	-	-	T	-	0	dbSNP:rs200810061
ENSG00000174373	RALGAPA1	0.0748464	0.512234		17	39	0.435897	-	-	-		-	1
ENSG00000131389	SLC6A6	0.0747493	0.512234		6	39	0.153846	-	-	-	T	-	0
ENSG00000143924	EML4	0.0748457	0.512234		4	39	0.102564	-	-	-	T	-	0
ENSG00000162599	NFIA	0.0748192	0.512234		9	39	0.230769	-	-	-	T	-	0
ENSG00000132849	INADL	0.0744786	0.512234		19	39	0.487179	-	-	-		-	0	COSMIC:COSM227409
ENSG00000165046	LETM2	0.0747478	0.512234		7	39	0.179487	-	-	-	T	-	0
ENSG00000103966	EHD4	0.0746833	0.512234		4	39	0.102564	-	-	-	T	-	0
ENSG00000122008	POLK	0.0749385	0.512417		5	39	0.128205	-	-	-	T	-	0	dbSNP:rs200548318
ENSG00000173588	CCDC41	0.0754218	0.514376		6	39	0.153846	-	-	-	T	-	1
ENSG00000121486	TRMT1L	0.0753614	0.514376		5	39	0.128205	-	-	-	T	-	0
ENSG00000177963	RIC8A	0.0753831	0.514376		8	39	0.205128	-	-	-	T	-	0
ENSG00000187024	PTRH1	0.0758208	0.516168		11	39	0.282051	-	-	-	T	-	0	ESP:TMP_ESP_9_130473576,ESP:TMP_ESP_9_130476414
ENSG00000164916	FOXK1	0.0758565	0.516168		4	39	0.102564	-	-	-	T	-	0
ENSG00000242802	AP5Z1	0.0759476	0.516168		8	39	0.205128	-	-	-	T	-	0	ESP:TMP_ESP_7_4829469
ENSG00000113649	TCERG1	0.0759463	0.516168		8	39	0.205128	-	-	-	T	-	0
ENSG00000112249	ASCC3	0.0763334	0.51834		13	39	0.333333	-	-	-		-	0
ENSG00000138448	ITGAV	0.0764067	0.518389		8	39	0.205128	-	-	-	T	-	0
ENSG00000163349	HIPK1	0.0767962	0.520123		11	39	0.282051	-	-	-	T	-	0	dbSNP:rs199724687
ENSG00000148288	GBGT1	0.0768612	0.520123		7	39	0.179487	-	-	-	T	-	0	dbSNP:rs200022661
ENSG00000148773	MKI67	0.076781	0.520123		13	39	0.333333	-	-	-		-	0
ENSG00000138641	HERC3	0.0769871	0.520525		12	39	0.307692	-	-	-	T	-	1
ENSG00000170949	ZNF160	0.0771246	0.521006		7	39	0.179487	-	-	-		-	0	dbSNP:rs200246077
ENSG00000153933	DGKE	0.0772752	0.521126		5	39	0.128205	-	-	-	T	-	0
ENSG00000152433	ZNF547	0.0772556	0.521126		4	39	0.102564	-	-	-	T	-	0	ESP:TMP_ESP_19_57889008,dbSNP:rs138872011
ENSG00000006194	ZNF263	0.0774671	0.521523		11	39	0.282051	-	-	-		-	0	dbSNP:rs139107623
ENSG00000103091	WDR59	0.07746	0.521523		10	39	0.25641	2.56721	0.00512607	0.0111842		[515,515]:2	0
ENSG00000186017	ZNF566	0.0776357	0.52221		4	39	0.102564	-	-	-	T	-	0
ENSG00000165934	CPSF2	0.0782277	0.525741		7	39	0.179487	-	-	-		-	0
ENSG00000171914	TLN2	0.0785472	0.526985		22	39	0.564103	-	-	-		-	0	COSMIC:COSM234129,ESP:TMP_ESP_15_63054667,dbSNP:rs148053073,dbSNP:rs186279188
ENSG00000152359	POC5	0.0785077	0.526985		6	39	0.153846	-	-	-	T	-	0
ENSG00000198478	SH3BGRL2	0.0787236	0.527717		3	39	0.0769231	-	-	-	T	-	0
ENSG00000135476	ESPL1	0.0788754	0.528283		17	39	0.435897	-	-	-		-	0	dbSNP:rs199791601,dbSNP:rs201916454
ENSG00000157654	PALM2-AKAP2	0.0795058	0.530397		16	39	0.410256	1.23567	0.108291	0.126164		[452,452]:2	0	dbSNP:rs200678539
ENSG00000189308	LIN54	0.0793768	0.530397		9	39	0.230769	-	-	-	T	-	0
ENSG00000196705	ZNF431	0.0795716	0.530397		3	39	0.0769231	-	-	-	T	-	0
ENSG00000172817	CYP7B1	0.0794703	0.530397		15	39	0.384615	-	-	-		-	0	dbSNP:rs200737038
ENSG00000089195	TRMT6	0.0795967	0.530397		6	39	0.153846	-	-	-	T	-	0
ENSG00000172331	BPGM	0.0795528	0.530397		2	39	0.0512821	-	-	-	T	-	0
ENSG00000106034	CPED1	0.0796777	0.530486		15	39	0.384615	-	-	-		-	0	ESP:TMP_ESP_7_120655802
ENSG00000127415	IDUA	0.0799345	0.531744		10	39	0.25641	-	-	-	T	-	0	ESP:TMP_ESP_4_985025,ESP:TMP_ESP_4_995421,ESP:TMP_ESP_4_996129
ENSG00000242574	HLA-DMB	0.0804484	0.532453		8	39	0.205128	-	-	-	T	-	0
ENSG00000086200	IPO11	0.0801986	0.532453		16	39	0.410256	-	-	-	T	-	0
ENSG00000100603	SNW1	0.0802495	0.532453		3	39	0.0769231	-	-	-	T	-	0
ENSG00000041880	PARP3	0.0803721	0.532453		10	39	0.25641	-	-	-	T	-	0	ESP:TMP_ESP_3_51982516
ENSG00000122741	DCAF10	0.0802287	0.532453		2	39	0.0512821	-	-	-	T	-	0
ENSG00000163093	BBS5	0.0803942	0.532453		7	39	0.179487	-	-	-	T	-	0
ENSG00000177697	CD151	0.0809085	0.535047		6	39	0.153846	-	-	-	T	-	0
ENSG00000112294	ALDH5A1	0.0811269	0.536039		7	39	0.179487	-	-	-	T	-	0
ENSG00000171490	RSL1D1	0.0813718	0.536248		4	39	0.102564	-	-	-	T	-	0
ENSG00000172466	ZNF24	0.081432	0.536248		2	39	0.0512821	-	-	-	T	-	0
ENSG00000119681	LTBP2	0.0813008	0.536248		15	39	0.384615	1.83486	0.0332632	0.0498948		[740,740]:2	0	dbSNP:rs142012825
ENSG00000204271	SPIN3	0.0814031	0.536248		2	39	0.0512821	-	-	-	T	-	0
ENSG00000068024	HDAC4	0.0815417	0.536519		15	39	0.384615	-	-	-		-	0
ENSG00000170248	PDCD6IP	0.0821241	0.537623		9	39	0.230769	-	-	-	T	-	0
ENSG00000172244	C5orf34	0.0820957	0.537623		6	39	0.153846	-	-	-	T	-	0
ENSG00000197170	PSMD12	0.0820367	0.537623		5	39	0.128205	-	-	-	T	-	0
ENSG00000100503	NIN	0.0821848	0.537623		14	39	0.358974	-	-	-		-	0	ESP:TMP_ESP_14_51219288,dbSNP:rs192818253,dbSNP:rs200510258
ENSG00000133226	SRRM1	0.081935	0.537623		9	39	0.230769	-	-	-		-	0
ENSG00000125122	LRRC29	0.0819896	0.537623		10	39	0.25641	-	-	-	T	-	0
ENSG00000168807	SNTB2	0.0821892	0.537623		7	39	0.179487	-	-	-	T	-	0
ENSG00000107854	TNKS2	0.0823108	0.53797		11	39	0.282051	-	-	-	T	-	0
ENSG00000103111	MON1B	0.0824036	0.538128		8	39	0.205128	-	-	-		-	0
ENSG00000014257	ACPP	0.0825084	0.538364		7	39	0.179487	-	-	-	T	-	0
ENSG00000139613	SMARCC2	0.0828611	0.540216		14	39	0.358974	-	-	-		-	0
ENSG00000183486	MX2	0.083423	0.541954		12	39	0.307692	2.56721	0.00512607	0.0111842		[106,106]:2	0	COSMIC:COSM139213,dbSNP:rs59821562
ENSG00000135974	C2orf49	0.0834557	0.541954		4	39	0.102564	-	-	-	T	-	0
ENSG00000105227	PRX	0.083441	0.541954		11	39	0.282051	-	-	-		-	0
ENSG00000175445	LPL	0.0832347	0.541954		6	39	0.153846	-	-	-	T	-	0	dbSNP:rs149089920
ENSG00000087301	TXNDC16	0.0835423	0.541954		10	39	0.25641	-	-	-	N	-	0
ENSG00000137497	NUMA1	0.0834803	0.541954		14	39	0.358974	-	-	-		-	0	dbSNP:rs143730967
ENSG00000188641	DPYD	0.0841693	0.542896		17	39	0.435897	-	-	-		-	0	ESP:TMP_ESP_1_97771869,dbSNP:rs183385770
ENSG00000100578	KIAA0586	0.084172	0.542896		11	39	0.282051	-	-	-	T	-	0	ESP:TMP_ESP_14_58923407
ENSG00000198546	ZNF511	0.0837734	0.542896		10	39	0.25641	-	-	-	T	-	0
ENSG00000140983	RHOT2	0.084017	0.542896		14	39	0.358974	-	-	-		-	0	dbSNP:rs141147586
ENSG00000183018	SPNS2	0.0839303	0.542896		9	39	0.230769	-	-	-	T	-	0	ESP:TMP_ESP_17_4444803
ENSG00000144320	KIAA1715	0.0841017	0.542896		4	39	0.102564	-	-	-	T	-	0
ENSG00000165209	STRBP	0.0841168	0.542896		9	39	0.230769	-	-	-	T	-	0
ENSG00000197647	ZNF433	0.0843144	0.542921		4	39	0.102564	-	-	-	T	-	0	ESP:rs142249320
ENSG00000122863	CHST3	0.0842763	0.542921		6	39	0.153846	-	-	-	T	-	0	ESP:TMP_ESP_10_73765585
ENSG00000156273	BACH1	0.0844672	0.543459		11	39	0.282051	-	-	-	T	-	0
ENSG00000146247	PHIP	0.0846587	0.544244		9	39	0.230769	-	-	-		-	0
ENSG00000142208	AKT1	0.0847581	0.544437		4	39	0.102564	-	-	-	T	-	1
ENSG00000151292	CSNK1G3	0.0848376	0.54445		6	39	0.153846	-	-	-	T	-	0
ENSG00000155636	RBM45	0.0848989	0.54445		5	39	0.128205	-	-	-	T	-	0
ENSG00000198453	ZNF568	0.0853751	0.547056		11	39	0.282051	-	-	-		-	1	COSMIC:COSM188331
ENSG00000142082	SIRT3	0.0857512	0.549018		9	39	0.230769	-	-	-	T	-	0
ENSG00000172403	SYNPO2	0.0859131	0.549606		9	39	0.230769	-	-	-		-	0
ENSG00000085788	DDHD2	0.0862737	0.551462		12	39	0.307692	-	-	-	T	-	0
ENSG00000102265	TIMP1	0.0866769	0.553589		3	39	0.0769231	-	-	-	T	-	0
ENSG00000162688	AGL	0.0868483	0.554232		13	39	0.333333	-	-	-		-	0
ENSG00000143951	WDPCP	0.0876102	0.555928		12	39	0.307692	-	-	-		-	0
ENSG00000164291	ARSK	0.0875045	0.555928		3	39	0.0769231	-	-	-	T	-	0
ENSG00000090097	PCBP4	0.0874155	0.555928		14	39	0.358974	-	-	-	T	-	0	COSMIC:COSM191170,dbSNP:rs201010064
ENSG00000156374	PCGF6	0.0875962	0.555928		3	39	0.0769231	-	-	-	T	-	0
ENSG00000110013	SIAE	0.0873965	0.555928		10	39	0.25641	-	-	-	T	-	0	ESP:TMP_ESP_11_124524622,dbSNP:rs144510878
ENSG00000160075	SSU72	0.0874844	0.555928		5	39	0.128205	-	-	-	T	-	0
ENSG00000164053	ATRIP	0.0875144	0.555928		6	39	0.153846	-	-	-	T	-	0
ENSG00000225697	SLC26A6	0.0878456	0.556971		11	39	0.282051	-	-	-	T	-	0	ESP:TMP_ESP_3_48663652,dbSNP:rs187022285,dbSNP:rs200099722
ENSG00000176208	ATAD5	0.0881262	0.557126		7	39	0.179487	-	-	-		-	0
ENSG00000254996	ANKHD1-EIF4EBP3	0.0881058	0.557126		12	39	0.307692	-	-	-		-	0
ENSG00000168522	FNTA	0.0881525	0.557126		4	39	0.102564	-	-	-	T	-	0	ESP:TMP_ESP_8_42939866
ENSG00000103021	CCDC113	0.0881542	0.557126		7	39	0.179487	-	-	-	T	-	0	COSMIC:COSM241274
ENSG00000123091	RNF11	0.0882337	0.557179		4	39	0.102564	-	-	-	T	-	0
ENSG00000166598	HSP90B1	0.0883339	0.557363		8	39	0.205128	-	-	-	T	-	0	ESP:TMP_ESP_12_104325284
ENSG00000205356	TECPR1	0.0884215	0.557468		17	39	0.435897	-	-	-		-	0	dbSNP:rs200282258,dbSNP:rs201080344
ENSG00000150510	FAM124A	0.0885613	0.5579		9	39	0.230769	-	-	-		-	0
ENSG00000168062	BATF2	0.0889052	0.558259		5	39	0.128205	-	-	-	T	-	0
ENSG00000205937	RNPS1	0.0888345	0.558259		12	39	0.307692	-	-	-	T	-	0
ENSG00000123427	METTL21B	0.0891417	0.558259		4	39	0.102564	-	-	-	T	-	0
ENSG00000143847	PPFIA4	0.088982	0.558259		12	39	0.307692	2.56721	0.00512607	0.0111842		[563,563]:2	0
ENSG00000204351	SKIV2L	0.0891876	0.558259		20	39	0.512821	-	-	-		-	0	COSMIC:COSM21037,COSMIC:COSM226579
ENSG00000143393	PI4KB	0.089076	0.558259		11	39	0.282051	-	-	-		-	0	COSMIC:COSM140960
ENSG00000050438	SLC4A8	0.0889862	0.558259		17	39	0.435897	-	-	-		-	0
ENSG00000165733	BMS1	0.0891007	0.558259		9	39	0.230769	-	-	-		-	0
ENSG00000104805	NUCB1	0.0894286	0.559321		7	39	0.179487	-	-	-	T	-	0
ENSG00000154217	PITPNC1	0.0895375	0.559556		6	39	0.153846	-	-	-	T	-	0
ENSG00000144224	UBXN4	0.0896296	0.559686		4	39	0.102564	-	-	-	T	-	0
ENSG00000101849	TBL1X	0.0899392	0.560281		6	39	0.153846	-	-	-	T	-	0
ENSG00000166130	IKBIP	0.0899196	0.560281		7	39	0.179487	-	-	-	T	-	0	ESP:TMP_ESP_12_99007499
ENSG00000170242	USP47	0.0898793	0.560281		9	39	0.230769	-	-	-	N	-	0
ENSG00000143126	CELSR2	0.0903541	0.561413		17	39	0.435897	-	-	-		-	0	dbSNP:rs146139897,dbSNP:rs201415723
ENSG00000121152	NCAPH	0.090417	0.561413		9	39	0.230769	-	-	-	T	-	0	ESP:TMP_ESP_2_97031592,dbSNP:rs72939607
ENSG00000176058	TPRN	0.0905504	0.561413		10	39	0.25641	-	-	-	T	-	0
ENSG00000111605	CPSF6	0.0904866	0.561413		7	39	0.179487	-	-	-		-	0
ENSG00000185905	C16orf54	0.0904011	0.561413		5	39	0.128205	-	-	-	T	-	0
ENSG00000115091	ACTR3	0.0903108	0.561413		4	39	0.102564	-	-	-	T	-	0
ENSG00000197563	PIGN	0.0907325	0.561654		11	39	0.282051	-	-	-		-	0
ENSG00000145439	CBR4	0.0907288	0.561654		5	39	0.128205	-	-	-	T	-	0	dbSNP:rs78562191
ENSG00000102098	SCML2	0.090847	0.561725		6	39	0.153846	-	-	-	T	-	0
ENSG00000067225	PKM	0.0908873	0.561725		7	39	0.179487	-	-	-	T	-	0
ENSG00000113532	ST8SIA4	0.091222	0.56335		5	39	0.128205	-	-	-	T	-	0	COSMIC:COSM225214,dbSNP:rs147924375
ENSG00000135636	DYSF	0.0918745	0.565611		30	39	0.769231	-	-	-		-	1	COSMIC:COSM140991,ESP:TMP_ESP_2_71744166,ESP:TMP_ESP_2_71789047,dbSNP:rs145143725,dbSNP:rs201592500
ENSG00000143889	HNRPLL	0.0918766	0.565611		3	39	0.0769231	-	-	-	T	-	0
ENSG00000173039	RELA	0.091857	0.565611		8	39	0.205128	-	-	-	N	-	0
ENSG00000104611	SH2D4A	0.0917771	0.565611		10	39	0.25641	2.56721	0.00512607	0.0111842		[280,280]:2	0
ENSG00000111110	PPM1H	0.0923788	0.566834		7	39	0.179487	-	-	-	T	-	0	dbSNP:rs141016293,dbSNP:rs144875947
ENSG00000141837	CACNA1A	0.0922143	0.566834		28	39	0.717949	-	-	-		-	0	ESP:TMP_ESP_19_13345814,ESP:TMP_ESP_19_13356050,ESP:TMP_ESP_19_13411342,dbSNP:rs144943245
ENSG00000089902	RCOR1	0.0924333	0.566834		4	39	0.102564	-	-	-	T	-	0
ENSG00000101290	CDS2	0.0924727	0.566834		7	39	0.179487	-	-	-	T	-	0	dbSNP:rs201613534
ENSG00000110881	ASIC1	0.0925089	0.566834		14	39	0.358974	-	-	-		-	0
ENSG00000144647	GTDC2	0.0924273	0.566834		3	39	0.0769231	-	-	-	T	-	0
ENSG00000172578	KLHL6	0.0926154	0.567044		10	39	0.25641	-	-	-		-	0	ESP:TMP_ESP_3_183217624
ENSG00000162924	REL	0.0929109	0.568409		4	39	0.102564	-	-	-	T	-	0
ENSG00000077235	GTF3C1	0.0932385	0.569968		18	39	0.461538	-	-	-		-	0	ESP:TMP_ESP_16_27514331,ESP:TMP_ESP_16_27519832,dbSNP:rs201456699,dbSNP:rs202063696
ENSG00000127995	CASD1	0.0933494	0.570202		9	39	0.230769	3.15308	0.000807776	0.00285098		[122,122]:2	0
ENSG00000185100	ADSSL1	0.0936895	0.571834		12	39	0.307692	-	-	-		-	0	dbSNP:rs144784529
ENSG00000128059	PPAT	0.0940406	0.572042		6	39	0.153846	-	-	-	T	-	0
ENSG00000177426	TGIF1	0.0941575	0.572042		4	39	0.102564	-	-	-	T	-	0	dbSNP:rs112640810,dbSNP:rs121909066
ENSG00000141664	ZCCHC2	0.0938125	0.572042		8	39	0.205128	-	-	-	T	-	0
ENSG00000000457	SCYL3	0.0941612	0.572042		10	39	0.25641	-	-	-	T	-	0
ENSG00000115970	THADA	0.094095	0.572042		17	39	0.435897	-	-	-	T	-	0	ESP:TMP_ESP_2_43813970,dbSNP:rs150317483
ENSG00000136732	GYPC	0.0940743	0.572042		8	39	0.205128	-	-	-	T	-	0
ENSG00000136451	VEZF1	0.0943462	0.572722		4	39	0.102564	-	-	-	T	-	1
ENSG00000205208	C4orf46	0.0946198	0.573939		3	39	0.0769231	-	-	-	T	-	0
ENSG00000256223	ZNF10	0.0948036	0.57461		5	39	0.128205	-	-	-	T	-	0	ESP:TMP_ESP_12_133728392
ENSG00000126012	KDM5C	0.0952508	0.576874		12	39	0.307692	-	-	-	N	-	1
ENSG00000065615	CYB5R4	0.0954783	0.577806		11	39	0.282051	-	-	-	T	-	0	dbSNP:rs200835560
ENSG00000117153	KLHL12	0.0957514	0.579012		5	39	0.128205	-	-	-	T	-	0
ENSG00000159189	C1QC	0.0960546	0.579951		10	39	0.25641	-	-	-	N	-	0
ENSG00000150967	ABCB9	0.0960104	0.579951		9	39	0.230769	-	-	-	T	-	0	dbSNP:rs146013715
ENSG00000136603	SKIL	0.0966703	0.58322		5	39	0.128205	-	-	-	T	-	0
ENSG00000103811	CTSH	0.0970179	0.583377		9	39	0.230769	-	-	-		-	0
ENSG00000100796	SMEK1	0.0968328	0.583377		8	39	0.205128	-	-	-	N	-	0
ENSG00000178904	DPY19L3	0.0970525	0.583377		8	39	0.205128	-	-	-	T	-	0
ENSG00000214530	STARD10	0.0970683	0.583377		4	39	0.102564	-	-	-	T	-	0	dbSNP:rs201289203
ENSG00000196876	SCN8A	0.0968632	0.583377		22	39	0.564103	-	-	-		-	1
ENSG00000120278	PLEKHG1	0.0971993	0.583717		14	39	0.358974	-	-	-		-	0
ENSG00000111644	ACRBP	0.0972884	0.583805		10	39	0.25641	-	-	-	N	-	0	dbSNP:rs137907685,dbSNP:rs138474024
ENSG00000196338	NLGN3	0.097377	0.583846		8	39	0.205128	-	-	-	T	-	0
ENSG00000183496	MEX3B	0.0975185	0.583846		3	39	0.0769231	-	-	-	T	-	0
ENSG00000081791	KIAA0141	0.0975054	0.583846		8	39	0.205128	2.56721	0.00512607	0.0111842		[206,206]:2	0
ENSG00000136811	ODF2	0.0979151	0.585675		10	39	0.25641	-	-	-	T	-	0
ENSG00000197603	C5orf42	0.0979753	0.585675		20	39	0.512821	-	-	-		-	0	ESP:TMP_ESP_5_37170109
ENSG00000170322	NFRKB	0.0980481	0.585675		10	39	0.25641	-	-	-		-	0	ESP:TMP_ESP_11_129751302
ENSG00000152061	RABGAP1L	0.0982748	0.586136		15	39	0.384615	-	-	-		-	0
ENSG00000072864	NDE1	0.0982322	0.586136		17	39	0.435897	-	-	-	T	-	0	dbSNP:rs151337580
ENSG00000175203	DCTN2	0.0984188	0.586426		18	39	0.461538	-	-	-	T	-	0
ENSG00000138670	RASGEF1B	0.0984729	0.586426		3	39	0.0769231	-	-	-	T	-	0
ENSG00000146757	ZNF92	0.0985614	0.586508		2	39	0.0512821	-	-	-	T	-	0
ENSG00000031081	ARHGAP31	0.0988628	0.587855		13	39	0.333333	-	-	-		-	0	dbSNP:rs200063238
ENSG00000182199	SHMT2	0.099081	0.588554		9	39	0.230769	-	-	-	T	-	0
ENSG00000171428	NAT1	0.0991304	0.588554		4	39	0.102564	-	-	-	T	-	0
ENSG00000102575	ACP5	0.0995119	0.58948		5	39	0.128205	-	-	-	T	-	0
ENSG00000185344	ATP6V0A2	0.0993887	0.58948		15	39	0.384615	-	-	-		-	0
ENSG00000168172	HOOK3	0.0994578	0.58948		6	39	0.153846	-	-	-	T	-	0
ENSG00000163131	CTSS	0.0998395	0.590084		8	39	0.205128	-	-	-	T	-	0
ENSG00000115282	TTC31	0.0997518	0.590084		14	39	0.358974	-	-	-	T	-	0
ENSG00000110777	POU2AF1	0.0998255	0.590084		2	39	0.0512821	-	-	-	T	-	0
ENSG00000005844	ITGAL	0.100096	0.591152		19	39	0.487179	-	-	-		-	0	ESP:TMP_ESP_16_30486609,ESP:TMP_ESP_16_30495214,ESP:TMP_ESP_16_30529174,dbSNP:rs139818386
ENSG00000179361	ARID3B	0.100268	0.591727		8	39	0.205128	-	-	-		-	0	ESP:TMP_ESP_15_74883692
ENSG00000101751	POLI	0.100463	0.591795		8	39	0.205128	-	-	-	T	-	0
ENSG00000108587	GOSR1	0.100467	0.591795		3	39	0.0769231	-	-	-	T	-	0
ENSG00000074181	NOTCH3	0.100506	0.591795		21	39	0.538462	-	-	-		-	0
ENSG00000076513	ANKRD13A	0.10097	0.593633		5	39	0.128205	-	-	-	T	-	0
ENSG00000253846	PCDHGA10	0.100948	0.593633		27	39	0.692308	-	-	-		-	0	COSMIC:COSM205280,dbSNP:rs138641753,dbSNP:rs142995927,dbSNP:rs188787674,dbSNP:rs202046219
ENSG00000259494	MRPL46	0.101181	0.594273		3	39	0.0769231	-	-	-	T	-	0	dbSNP:rs147619280
ENSG00000156639	ZFAND3	0.10123	0.594273		6	39	0.153846	-	-	-	T	-	0
ENSG00000111602	TIMELESS	0.102299	0.597027		14	39	0.358974	-	-	-		-	0	ESP:TMP_ESP_12_56817298
ENSG00000140545	MFGE8	0.102081	0.597027		7	39	0.179487	-	-	-	N	-	0
ENSG00000100983	GSS	0.102071	0.597027		8	39	0.205128	-	-	-	T	-	0	dbSNP:rs41303799
ENSG00000150907	FOXO1	0.101866	0.597027		4	39	0.102564	-	-	-	T	-	0
ENSG00000128346	C22orf23	0.102385	0.597027		7	39	0.179487	-	-	-	T	-	0
ENSG00000150403	TMCO3	0.102115	0.597027		6	39	0.153846	-	-	-	T	-	0
ENSG00000164674	SYTL3	0.10222	0.597027		13	39	0.333333	-	-	-	N	-	0	ESP:TMP_ESP_6_159103981,dbSNP:rs56233811
ENSG00000253873	PCDHGA11	0.102355	0.597027		24	39	0.615385	-	-	-		-	0	COSMIC:COSM205280,dbSNP:rs138641753,dbSNP:rs142995927,dbSNP:rs188787674,dbSNP:rs202046219
ENSG00000103044	HAS3	0.101889	0.597027		3	39	0.0769231	-	-	-	T	-	0
ENSG00000104549	SQLE	0.103388	0.60243		4	39	0.102564	-	-	-	T	-	0
ENSG00000134242	PTPN22	0.103761	0.603709		16	39	0.410256	1.59074	0.0558335	0.0724326		[797,797]:2	0	COSMIC:COSM230869
ENSG00000166263	STXBP4	0.103688	0.603709		12	39	0.307692	-	-	-		-	0
ENSG00000117385	LEPRE1	0.103877	0.603937		11	39	0.282051	-	-	-		-	0
ENSG00000067177	PHKA1	0.104036	0.60441		7	39	0.179487	-	-	-	T	-	0
ENSG00000109944	C11orf63	0.104456	0.606404		8	39	0.205128	-	-	-		-	0	COSMIC:COSM272129
ENSG00000136059	VILL	0.104673	0.606765		10	39	0.25641	-	-	-	T	-	0
ENSG00000151348	EXT2	0.104609	0.606765		8	39	0.205128	-	-	-		-	0	dbSNP:rs148753786
ENSG00000146063	TRIM41	0.105997	0.610499		9	39	0.230769	-	-	-		-	0	dbSNP:rs150494945
ENSG00000165891	E2F7	0.106684	0.610499		14	39	0.358974	-	-	-		-	0	dbSNP:rs201812783,dbSNP:rs75419810
ENSG00000113318	MSH3	0.105881	0.610499		10	39	0.25641	-	-	-	T	-	0	dbSNP:rs183782347
ENSG00000119844	AFTPH	0.106376	0.610499		4	39	0.102564	-	-	-	T	-	0
ENSG00000132669	RIN2	0.106315	0.610499		3	39	0.0769231	-	-	-	T	-	0
ENSG00000101413	RPRD1B	0.106184	0.610499		4	39	0.102564	-	-	-	T	-	0
ENSG00000125967	NECAB3	0.106157	0.610499		13	39	0.333333	-	-	-	T	-	0	dbSNP:rs200489455
ENSG00000076258	FMO4	0.105962	0.610499		3	39	0.0769231	-	-	-	T	-	0	dbSNP:rs144010968
ENSG00000140400	MAN2C1	0.106372	0.610499		17	39	0.435897	-	-	-	T	-	0
ENSG00000197162	ZNF785	0.106704	0.610499		5	39	0.128205	-	-	-	T	-	0
ENSG00000152601	MBNL1	0.106719	0.610499		8	39	0.205128	-	-	-	T	-	0	ESP:TMP_ESP_3_152176018
ENSG00000170469	SPATA24	0.105477	0.610499		5	39	0.128205	-	-	-	T	-	0
ENSG00000074964	ARHGEF10L	0.106473	0.610499		18	39	0.461538	-	-	-		-	0	ESP:TMP_ESP_1_18023687
ENSG00000131584	ACAP3	0.105738	0.610499		23	39	0.589744	-	-	-	T	-	0	dbSNP:rs150828810
ENSG00000133789	SWAP70	0.106525	0.610499		4	39	0.102564	-	-	-	T	-	0
ENSG00000137073	UBAP2	0.105585	0.610499		6	39	0.153846	-	-	-	T	-	0
ENSG00000111728	ST8SIA1	0.105536	0.610499		3	39	0.0769231	-	-	-	T	-	0
ENSG00000185522	C11orf35	0.105995	0.610499		15	39	0.384615	-	-	-	T	-	0	ESP:TMP_ESP_11_557359,dbSNP:rs7109500
ENSG00000120093	HOXB3	0.107186	0.612416		12	39	0.307692	-	-	-		-	0
ENSG00000113851	CRBN	0.107366	0.612416		7	39	0.179487	-	-	-	T	-	0	dbSNP:rs182537090
ENSG00000013288	MAN2B2	0.107254	0.612416		11	39	0.282051	-	-	-		-	0	COSMIC:COSM162347,ESP:TMP_ESP_4_6598842,dbSNP:rs140227562
ENSG00000125510	OPRL1	0.107301	0.612416		8	39	0.205128	-	-	-	T	-	0
ENSG00000123360	PDE1B	0.107793	0.614405		14	39	0.358974	-	-	-	T	-	0
ENSG00000104154	SLC30A4	0.108224	0.616237		4	39	0.102564	-	-	-	T	-	0
ENSG00000164330	EBF1	0.108272	0.616237		20	39	0.512821	-	-	-		-	0	dbSNP:rs79510724
ENSG00000120049	KCNIP2	0.108893	0.618425		5	39	0.128205	-	-	-	T	-	0
ENSG00000015532	XYLT2	0.108748	0.618425		5	39	0.128205	-	-	-	T	-	0
ENSG00000105879	CBLL1	0.108841	0.618425		4	39	0.102564	-	-	-	T	-	0
ENSG00000204516	MICB	0.109082	0.619051		9	39	0.230769	-	-	-	T	-	0
ENSG00000164440	TXLNB	0.109438	0.619282		10	39	0.25641	3.15308	0.000807776	0.00285098		[558,558]:2	0
ENSG00000023516	AKAP11	0.109312	0.619282		7	39	0.179487	-	-	-		-	0
ENSG00000169570	DTWD2	0.109407	0.619282		4	39	0.102564	-	-	-	T	-	0
ENSG00000114446	IFT57	0.109339	0.619282		4	39	0.102564	-	-	-	T	-	0
ENSG00000162852	CNST	0.109999	0.621406		7	39	0.179487	-	-	-	T	-	0
ENSG00000110107	PRPF19	0.110051	0.621406		9	39	0.230769	-	-	-	T	-	0
ENSG00000141098	GFOD2	0.109935	0.621406		3	39	0.0769231	-	-	-	T	-	0
ENSG00000088367	EPB41L1	0.11035	0.621751		17	39	0.435897	-	-	-		-	0
ENSG00000167232	ZNF91	0.110273	0.621751		9	39	0.230769	-	-	-		-	0	dbSNP:rs182466127
ENSG00000156853	ZNF689	0.110328	0.621751		6	39	0.153846	-	-	-		-	0
ENSG00000185697	MYBL1	0.110785	0.623752		7	39	0.179487	-	-	-	T	-	0
ENSG00000033867	SLC4A7	0.111126	0.624069		9	39	0.230769	-	-	-		-	0	dbSNP:rs147800417
ENSG00000076685	NT5C2	0.111196	0.624069		6	39	0.153846	-	-	-	T	-	0	ESP:TMP_ESP_10_104866352
ENSG00000049618	ARID1B	0.111319	0.624069		7	39	0.179487	-	-	-	T	-	0
ENSG00000122591	FAM126A	0.111158	0.624069		5	39	0.128205	-	-	-	T	-	0
ENSG00000113108	APBB3	0.111307	0.624069		15	39	0.384615	-	-	-	T	-	0
ENSG00000113615	SEC24A	0.111259	0.624069		8	39	0.205128	-	-	-	T	-	0	COSMIC:COSM224287
ENSG00000108270	AATF	0.111423	0.624206		8	39	0.205128	-	-	-	T	-	0	dbSNP:rs199854942
ENSG00000078403	MLLT10	0.111818	0.625082		8	39	0.205128	-	-	-	T	-	0
ENSG00000122986	HVCN1	0.111715	0.625082		8	39	0.205128	-	-	-	T	-	0	ESP:TMP_ESP_12_111098949
ENSG00000198911	SREBF2	0.111789	0.625082		12	39	0.307692	-	-	-		-	0	dbSNP:rs150623766
ENSG00000147324	MFHAS1	0.112311	0.626946		3	39	0.0769231	-	-	-	T	-	0
ENSG00000179335	CLK3	0.112293	0.626946		5	39	0.128205	-	-	-	T	-	0
ENSG00000186517	ARHGAP30	0.112541	0.627324		21	39	0.538462	-	-	-		-	0	ESP:TMP_ESP_1_161018326,dbSNP:rs201790759
ENSG00000167850	CD300C	0.112602	0.627324		3	39	0.0769231	-	-	-	T	-	0
ENSG00000076003	MCM6	0.112619	0.627324		8	39	0.205128	-	-	-	T	-	0
ENSG00000186026	ZNF284	0.112837	0.627647		4	39	0.102564	-	-	-	T	-	0
ENSG00000155158	TTC39B	0.112774	0.627647		5	39	0.128205	-	-	-	T	-	0
ENSG00000183765	CHEK2	0.112976	0.627972		11	39	0.282051	-	-	-	T	-	0
ENSG00000133739	LRRCC1	0.113393	0.629844		11	39	0.282051	-	-	-	T	-	0
ENSG00000178075	GRAMD1C	0.113839	0.631441		10	39	0.25641	-	-	-	T	-	0
ENSG00000066923	STAG3	0.113841	0.631441		18	39	0.461538	-	-	-		-	0
ENSG00000155850	SLC26A2	0.11419	0.632928		8	39	0.205128	-	-	-		-	0
ENSG00000164535	DAGLB	0.114286	0.633014		9	39	0.230769	-	-	-	T	-	0
ENSG00000176293	ZNF135	0.1148	0.635412		17	39	0.435897	-	-	-		-	0	ESP:TMP_ESP_19_58578510,dbSNP:rs139950426,dbSNP:rs182688701,dbSNP:rs200452996,dbSNP:rs200570352
ENSG00000126217	MCF2L	0.114983	0.635976		15	39	0.384615	-	-	-		-	0	ESP:TMP_ESP_13_113729446,ESP:TMP_ESP_13_113741503
ENSG00000152942	RAD17	0.115605	0.638964		14	39	0.358974	-	-	-	T	-	0
ENSG00000149100	EIF3M	0.115736	0.639238		6	39	0.153846	-	-	-	T	-	0
ENSG00000116761	CTH	0.115883	0.639598		7	39	0.179487	-	-	-	T	-	0	dbSNP:rs139166171
ENSG00000243725	TTC4	0.116081	0.640012		7	39	0.179487	-	-	-	T	-	0
ENSG00000188677	PARVB	0.116121	0.640012		9	39	0.230769	-	-	-	T	-	0	ESP:TMP_ESP_22_44553955,dbSNP:rs185023361
ENSG00000138629	UBL7	0.116225	0.640135		6	39	0.153846	-	-	-	T	-	0
ENSG00000144535	DIS3L2	0.116384	0.640559		15	39	0.384615	-	-	-		-	0
ENSG00000132963	POMP	0.116476	0.640616		4	39	0.102564	-	-	-	T	-	0
ENSG00000113319	RASGRF2	0.116765	0.641308		19	39	0.487179	-	-	-		-	0	dbSNP:rs147185425
ENSG00000119812	FAM98A	0.116758	0.641308		5	39	0.128205	-	-	-	T	-	0
ENSG00000133639	BTG1	0.116891	0.641549		4	39	0.102564	-	-	-	T	-	0
ENSG00000014138	POLA2	0.11709	0.641886		7	39	0.179487	-	-	-	T	-	0
ENSG00000002726	ABP1	0.117118	0.641886		11	39	0.282051	-	-	-		-	0	ESP:TMP_ESP_7_150558050,dbSNP:rs150589026
ENSG00000091073	DTX2	0.117198	0.641886		4	39	0.102564	-	-	-	T	-	0
ENSG00000164713	BRI3	0.117374	0.642401		5	39	0.128205	-	-	-	T	-	0
ENSG00000185480	PARPBP	0.117615	0.643275		8	39	0.205128	-	-	-	T	-	0	ESP:TMP_ESP_12_102590984,dbSNP:rs141964854
ENSG00000163376	KBTBD8	0.117793	0.643797		5	39	0.128205	-	-	-	T	-	0
ENSG00000177084	POLE	0.118249	0.64514		26	39	0.666667	-	-	-	T	-	1	ESP:TMP_ESP_12_133219058,ESP:TMP_ESP_12_133306305,dbSNP:rs199941283
ENSG00000169288	MRPL1	0.118196	0.64514		5	39	0.128205	-	-	-	T	-	0
ENSG00000188785	ZNF548	0.118285	0.64514		4	39	0.102564	-	-	-	T	-	0
ENSG00000106565	TMEM176B	0.118423	0.645357		16	39	0.410256	-	-	-		-	0	COSMIC:COSM233597
ENSG00000165632	TAF3	0.11849	0.645357		8	39	0.205128	-	-	-		-	0
ENSG00000183048	SLC25A10	0.118708	0.646021		10	39	0.25641	-	-	-		-	0	ESP:TMP_ESP_17_79683005,ESP:TMP_ESP_17_79686805,dbSNP:rs118086689
ENSG00000109670	FBXW7	0.118826	0.646021		9	39	0.230769	-	-	-	T	-	1
ENSG00000117289	TXNIP	0.118859	0.646021		6	39	0.153846	-	-	-	T	-	1
ENSG00000146433	TMEM181	0.119336	0.648165		7	39	0.179487	-	-	-	T	-	0
ENSG00000169764	UGP2	0.119636	0.649053		3	39	0.0769231	-	-	-	T	-	0
ENSG00000198785	GRIN3A	0.119665	0.649053		20	39	0.512821	1.1707	0.12086	0.139453		[350,357]:4	0	dbSNP:rs142779054,dbSNP:rs200666108
ENSG00000198561	CTNND1	0.120265	0.651856		15	39	0.384615	-	-	-	N	-	1
ENSG00000131781	FMO5	0.120389	0.652082		3	39	0.0769231	-	-	-	T	-	0
ENSG00000171502	COL24A1	0.120502	0.65224		28	39	0.717949	-	-	-		-	0	ESP:TMP_ESP_1_86437071,ESP:TMP_ESP_1_86581030
ENSG00000030066	NUP160	0.120928	0.652728		11	39	0.282051	-	-	-		-	0	ESP:TMP_ESP_11_47801953
ENSG00000198521	ZNF43	0.120995	0.652728		9	39	0.230769	2.56721	0.00512607	0.0111842		[588,588]:2	0	dbSNP:rs183491109
ENSG00000163867	ZMYM6	0.120682	0.652728		8	39	0.205128	-	-	-	T	-	0
ENSG00000007047	MARK4	0.121	0.652728		21	39	0.538462	-	-	-	T	-	0	ESP:TMP_ESP_19_45731005,dbSNP:rs151025211,dbSNP:rs185685640
ENSG00000008311	AASS	0.121008	0.652728		10	39	0.25641	-	-	-	T	-	0	dbSNP:rs199721593
ENSG00000188549	C15orf52	0.121095	0.65275		9	39	0.230769	-	-	-	T	-	0
ENSG00000126226	PCID2	0.121772	0.655834		6	39	0.153846	-	-	-	T	-	0
ENSG00000105856	HBP1	0.121835	0.655834		4	39	0.102564	-	-	-	T	-	0	dbSNP:rs146024949
ENSG00000042980	ADAM28	0.12236	0.658211		18	39	0.461538	1.59074	0.0558335	0.0724326		[590,590]:2	0	COSMIC:COSM139753,ESP:TMP_ESP_8_24188864,ESP:TMP_ESP_8_24193193,dbSNP:rs201304235
ENSG00000105948	TTC26	0.122519	0.658612		13	39	0.333333	-	-	-	T	-	0
ENSG00000171444	MCC	0.122644	0.658831		10	39	0.25641	-	-	-		-	0	COSMIC:COSM73101,ESP:TMP_ESP_5_112458428,dbSNP:rs141484479,dbSNP:rs192780356,dbSNP:rs199613682
ENSG00000147548	WHSC1L1	0.122788	0.659156		7	39	0.179487	-	-	-	T	-	1
ENSG00000114904	NEK4	0.123489	0.661047		6	39	0.153846	-	-	-	T	-	0	COSMIC:COSM221998
ENSG00000187109	NAP1L1	0.123562	0.661047		3	39	0.0769231	-	-	-	T	-	0	dbSNP:rs138832974
ENSG00000009844	VTA1	0.12345	0.661047		4	39	0.102564	-	-	-	T	-	0
ENSG00000157637	SLC38A10	0.123405	0.661047		15	39	0.384615	-	-	-		-	0	dbSNP:rs141273985
ENSG00000141959	PFKL	0.123282	0.661047		13	39	0.333333	-	-	-	T	-	0
ENSG00000156787	WDR67	0.123754	0.661176		8	39	0.205128	-	-	-	T	-	0	dbSNP:rs144033919
ENSG00000122507	BBS9	0.123751	0.661176		13	39	0.333333	1.83486	0.0332632	0.0498948		[278,278]:2	0
ENSG00000071189	SNX13	0.123975	0.661904		14	39	0.358974	-	-	-		-	0	dbSNP:rs200885761
ENSG00000010244	ZNF207	0.124142	0.662343		9	39	0.230769	-	-	-	T	-	0
ENSG00000154175	ABI3BP	0.12456	0.664124		20	39	0.512821	-	-	-		-	0
ENSG00000104290	FZD3	0.124786	0.664873		3	39	0.0769231	-	-	-	T	-	0
ENSG00000144451	SPAG16	0.125047	0.66536		14	39	0.358974	-	-	-	T	-	0	ESP:TMP_ESP_2_215279114
ENSG00000184083	FAM120C	0.125014	0.66536		9	39	0.230769	-	-	-	N	-	0
ENSG00000100109	TFIP11	0.125322	0.666376		11	39	0.282051	-	-	-	T	-	0	dbSNP:rs200134844
ENSG00000144283	PKP4	0.125481	0.666766		12	39	0.307692	-	-	-		-	0	COSMIC:COSM107938,dbSNP:rs140873133,dbSNP:rs201008561
ENSG00000113594	LIFR	0.125583	0.666856		15	39	0.384615	-	-	-		-	0
ENSG00000116580	GON4L	0.125969	0.668453		14	39	0.358974	-	-	-		-	0
ENSG00000072756	TRNT1	0.126089	0.668515		6	39	0.153846	-	-	-	T	-	0
ENSG00000163879	DNALI1	0.126151	0.668515		10	39	0.25641	-	-	-	T	-	0
ENSG00000089692	LAG3	0.126966	0.67238		8	39	0.205128	-	-	-	T	-	0
ENSG00000005302	MSL3	0.127195	0.673139		3	39	0.0769231	-	-	-	T	-	0
ENSG00000116062	MSH6	0.127862	0.676214		7	39	0.179487	-	-	-		-	0
ENSG00000085644	ZNF213	0.128276	0.677941		3	39	0.0769231	-	-	-	T	-	0
ENSG00000108509	CAMTA2	0.128462	0.678014		14	39	0.358974	-	-	-		-	0
ENSG00000143119	CD53	0.128418	0.678014		8	39	0.205128	-	-	-	T	-	0	dbSNP:rs201904601
ENSG00000124177	CHD6	0.128558	0.678064		16	39	0.410256	-	-	-		-	0	ESP:TMP_ESP_20_40043905,ESP:TMP_ESP_20_40074339
ENSG00000106682	EIF4H	0.128773	0.678286		4	39	0.102564	-	-	-	T	-	0
ENSG00000143479	DYRK3	0.128746	0.678286		6	39	0.153846	-	-	-	T	-	0
ENSG00000214021	TTLL3	0.12899	0.678971		9	39	0.230769	-	-	-		-	0
ENSG00000143614	GATAD2B	0.129453	0.680954		4	39	0.102564	-	-	-	T	-	0
ENSG00000100934	SEC23A	0.129543	0.68097		12	39	0.307692	-	-	-		-	0
ENSG00000112851	ERBB2IP	0.129883	0.681422		12	39	0.307692	-	-	-		-	0
ENSG00000181444	ZNF467	0.129797	0.681422		11	39	0.282051	2.56721	0.00512607	0.0111842		[217,217]:2	0
ENSG00000090061	CCNK	0.12989	0.681422		9	39	0.230769	-	-	-	T	-	0
ENSG00000156931	VPS8	0.130195	0.682565		15	39	0.384615	-	-	-		-	0
ENSG00000111254	AKAP3	0.130305	0.682684		12	39	0.307692	-	-	-		-	0	ESP:TMP_ESP_12_4736816
ENSG00000135905	DOCK10	0.130484	0.682732		20	39	0.512821	-	-	-		-	0	ESP:TMP_ESP_2_225684175,ESP:TMP_ESP_2_225688200
ENSG00000117479	SLC19A2	0.130662	0.682732		3	39	0.0769231	-	-	-	T	-	0
ENSG00000066056	TIE1	0.130634	0.682732		16	39	0.410256	1.59074	0.0558335	0.0724326		[129,129]:2	0	ESP:TMP_ESP_1_43779458,dbSNP:rs200393857
ENSG00000135245	HILPDA	0.1305	0.682732		4	39	0.102564	-	-	-	T	-	0
ENSG00000178852	EFCAB13	0.131335	0.68316		10	39	0.25641	-	-	-		-	0
ENSG00000172428	MYEOV2	0.131365	0.68316		4	39	0.102564	-	-	-	T	-	0
ENSG00000079805	DNM2	0.131403	0.68316		12	39	0.307692	-	-	-	N	-	0	ESP:TMP_ESP_19_10935724
ENSG00000186010	NDUFA13	0.131317	0.68316		10	39	0.25641	-	-	-		-	0
ENSG00000174173	TRMT10C	0.131512	0.68316		3	39	0.0769231	-	-	-	T	-	0
ENSG00000175166	PSMD2	0.131511	0.68316		11	39	0.282051	-	-	-		-	0
ENSG00000087460	GNAS	0.13141	0.68316		22	39	0.564103	-	-	-		-	1	dbSNP:rs140388147,dbSNP:rs202104005
ENSG00000158457	TSPAN33	0.131528	0.68316		13	39	0.333333	-	-	-	T	-	0
ENSG00000128567	PODXL	0.131094	0.68316		7	39	0.179487	-	-	-	T	-	0
ENSG00000143669	LYST	0.1317	0.683605		22	39	0.564103	-	-	-		-	0	ESP:TMP_ESP_1_235969733,dbSNP:rs200381196
ENSG00000175220	ARHGAP1	0.131822	0.683781		10	39	0.25641	-	-	-	T	-	0
ENSG00000076555	ACACB	0.132122	0.684886		22	39	0.564103	-	-	-		-	0	dbSNP:rs113883937,dbSNP:rs201825944
ENSG00000213676	ATF6B	0.132861	0.688265		16	39	0.410256	-	-	-		-	0	ESP:TMP_ESP_6_32087614
ENSG00000137812	CASC5	0.133017	0.688617		14	39	0.358974	-	-	-		-	0
ENSG00000160285	LSS	0.133427	0.690139		11	39	0.282051	-	-	-	T	-	0	ESP:TMP_ESP_21_47625860
ENSG00000125257	ABCC4	0.133487	0.690139		10	39	0.25641	-	-	-	T	-	0
ENSG00000090447	TFAP4	0.134009	0.691014		8	39	0.205128	-	-	-	T	-	0
ENSG00000129351	ILF3	0.133836	0.691014		12	39	0.307692	-	-	-	T	-	0
ENSG00000163909	HEYL	0.134002	0.691014		7	39	0.179487	-	-	-		-	0	ESP:TMP_ESP_1_40092754
ENSG00000111913	FAM65B	0.133818	0.691014		16	39	0.410256	-	-	-		-	0	dbSNP:rs142889670
ENSG00000184867	ARMCX2	0.134277	0.691941		6	39	0.153846	-	-	-	T	-	0	COSMIC:COSM199680
ENSG00000198231	DDX42	0.13596	0.693487		9	39	0.230769	-	-	-	T	-	0
ENSG00000196865	NHLRC2	0.135261	0.693487		11	39	0.282051	-	-	-	T	-	0
ENSG00000089006	SNX5	0.136013	0.693487		4	39	0.102564	-	-	-	T	-	0
ENSG00000154822	PLCL2	0.135716	0.693487		11	39	0.282051	-	-	-		-	0	COSMIC:COSM137843,COSMIC:COSM181927,dbSNP:rs139006028,dbSNP:rs184972109
ENSG00000026297	RNASET2	0.13548	0.693487		7	39	0.179487	-	-	-	T	-	0
ENSG00000205726	ITSN1	0.135499	0.693487		17	39	0.435897	-	-	-	T	-	0	ESP:TMP_ESP_21_35134276
ENSG00000204569	PPP1R10	0.135932	0.693487		11	39	0.282051	-	-	-	T	-	0
ENSG00000166135	HIF1AN	0.135831	0.693487		10	39	0.25641	-	-	-	T	-	0	ESP:TMP_ESP_10_102289603
ENSG00000143190	POU2F1	0.135948	0.693487		6	39	0.153846	-	-	-	T	-	0	COSMIC:COSM227199
ENSG00000184661	CDCA2	0.135524	0.693487		7	39	0.179487	-	-	-	T	-	0
ENSG00000130695	CEP85	0.134776	0.693487		8	39	0.205128	-	-	-	T	-	0
ENSG00000132481	TRIM47	0.135936	0.693487		5	39	0.128205	-	-	-	T	-	0
ENSG00000198538	ZNF28	0.13608	0.693487		10	39	0.25641	-	-	-	T	-	0	ESP:TMP_ESP_19_53304170
ENSG00000138780	GSTCD	0.134892	0.693487		8	39	0.205128	-	-	-	N	-	0	ESP:TMP_ESP_4_106766630
ENSG00000151702	FLI1	0.134692	0.693487		10	39	0.25641	-	-	-		-	0	dbSNP:rs200682479
ENSG00000149418	ST14	0.13506	0.693487		9	39	0.230769	-	-	-	T	-	0
ENSG00000131398	KCNC3	0.135906	0.693487		12	39	0.307692	2.14872	0.0158282	0.028349		[507,507]:2	0	dbSNP:rs147343947
ENSG00000153207	AHCTF1	0.137139	0.698431		11	39	0.282051	-	-	-		-	0
ENSG00000181220	ZNF746	0.137696	0.70081		8	39	0.205128	-	-	-		-	0	dbSNP:rs142479747
ENSG00000156603	MED19	0.137979	0.701237		5	39	0.128205	-	-	-	T	-	0
ENSG00000133069	TMCC2	0.138048	0.701237		7	39	0.179487	-	-	-	T	-	0	COSMIC:COSM83966
ENSG00000083290	ULK2	0.13802	0.701237		11	39	0.282051	-	-	-	T	-	0	dbSNP:rs145146169
ENSG00000120690	ELF1	0.138275	0.70165		5	39	0.128205	-	-	-	T	-	0
ENSG00000149554	CHEK1	0.138308	0.70165		5	39	0.128205	-	-	-	T	-	0
ENSG00000169299	PGM2	0.139171	0.705572		5	39	0.128205	-	-	-	T	-	0
ENSG00000006607	FARP2	0.139592	0.706423		6	39	0.153846	-	-	-	T	-	0
ENSG00000115421	PAPOLG	0.139672	0.706423		5	39	0.128205	-	-	-	T	-	0	dbSNP:rs147986723
ENSG00000166848	TERF2IP	0.139699	0.706423		5	39	0.128205	-	-	-	T	-	0
ENSG00000145390	USP53	0.139476	0.706423		6	39	0.153846	-	-	-	T	-	0
ENSG00000170989	S1PR1	0.139802	0.706488		10	39	0.25641	-	-	-		-	0
ENSG00000171469	ZNF561	0.140557	0.709845		2	39	0.0512821	-	-	-	T	-	0
ENSG00000114902	SPCS1	0.140719	0.710193		3	39	0.0769231	-	-	-	T	-	0	COSMIC:COSM221998
ENSG00000067248	DHX29	0.140807	0.710193		9	39	0.230769	-	-	-	T	-	0	ESP:TMP_ESP_5_54603420
ENSG00000166949	SMAD3	0.141222	0.711644		9	39	0.230769	-	-	-	T	-	0	dbSNP:rs200689238
ENSG00000079257	LXN	0.141276	0.711644		7	39	0.179487	-	-	-	T	-	0
ENSG00000166197	NOLC1	0.141468	0.711694		12	39	0.307692	-	-	-	T	-	0
ENSG00000198919	DZIP3	0.141402	0.711694		23	39	0.589744	-	-	-		-	0	dbSNP:rs149807869,dbSNP:rs190719786
ENSG00000102078	SLC25A14	0.141558	0.711694		4	39	0.102564	-	-	-	T	-	0
ENSG00000197912	SPG7	0.141807	0.712485		13	39	0.333333	-	-	-		-	0	ESP:TMP_ESP_16_89627820
ENSG00000184489	PTP4A3	0.141929	0.712644		11	39	0.282051	-	-	-	T	-	0	dbSNP:rs73370200
ENSG00000089177	KIF16B	0.142215	0.713526		12	39	0.307692	-	-	-		-	0	COSMIC:COSM172022,COSMIC:COSM298707
ENSG00000121644	DESI2	0.142287	0.713526		3	39	0.0769231	-	-	-	T	-	0
ENSG00000149131	SERPING1	0.142729	0.715106		8	39	0.205128	-	-	-	T	-	0
ENSG00000162298	SYVN1	0.142875	0.715106		6	39	0.153846	-	-	-	T	-	0
ENSG00000126106	TMEM53	0.14279	0.715106		10	39	0.25641	-	-	-	T	-	0	dbSNP:rs145475460,dbSNP:rs150431791
ENSG00000204536	CCHCR1	0.14353	0.716997		15	39	0.384615	-	-	-	T	-	0
ENSG00000126777	KTN1	0.143581	0.716997		12	39	0.307692	-	-	-		-	0
ENSG00000211455	STK38L	0.143352	0.716997		8	39	0.205128	-	-	-	T	-	0	ESP:TMP_ESP_12_27475066
ENSG00000198586	TLK1	0.143619	0.716997		5	39	0.128205	-	-	-	T	-	0
ENSG00000006025	OSBPL7	0.144986	0.71973		14	39	0.358974	-	-	-	T	-	0	ESP:TMP_ESP_17_45890604
ENSG00000175564	UCP3	0.144272	0.71973		7	39	0.179487	-	-	-	T	-	0	dbSNP:rs139398702
ENSG00000079739	PGM1	0.144992	0.71973		7	39	0.179487	-	-	-	T	-	0
ENSG00000198833	UBE2J1	0.14482	0.71973		2	39	0.0512821	-	-	-	T	-	0
ENSG00000085719	CPNE3	0.144497	0.71973		11	39	0.282051	-	-	-		-	0	ESP:TMP_ESP_8_87549827,dbSNP:rs181759510,dbSNP:rs200420687
ENSG00000185664	PMEL	0.144642	0.71973		17	39	0.435897	-	-	-	T	-	0
ENSG00000167962	ZNF598	0.144812	0.71973		8	39	0.205128	-	-	-	N	-	0
ENSG00000101161	PRPF6	0.144579	0.71973		10	39	0.25641	-	-	-		-	0
ENSG00000122778	KIAA1549	0.144626	0.71973		22	39	0.564103	0.809575	0.209092	0.220097		[1719,1719]:2	0	ESP:TMP_ESP_7_138591781
ENSG00000137817	PARP6	0.145196	0.719829		9	39	0.230769	3.15308	0.000807776	0.00285098		[251,251]:2	0	COSMIC:COSM137631
ENSG00000188647	PTAR1	0.145111	0.719829		8	39	0.205128	-	-	-	T	-	0
ENSG00000048740	CELF2	0.145363	0.720206		18	39	0.461538	-	-	-		-	0	dbSNP:rs150599881
ENSG00000119977	TCTN3	0.145479	0.720323		10	39	0.25641	-	-	-		-	0
ENSG00000117399	CDC20	0.14575	0.720755		11	39	0.282051	-	-	-	T	-	0	dbSNP:rs200111540
ENSG00000196588	MKL1	0.146	0.720755		12	39	0.307692	-	-	-	T	-	0
ENSG00000165731	RET	0.145939	0.720755		12	39	0.307692	-	-	-		-	0	dbSNP:rs75225191
ENSG00000175764	TTLL11	0.146026	0.720755		9	39	0.230769	-	-	-		-	0
ENSG00000115419	GLS	0.145813	0.720755		7	39	0.179487	-	-	-	T	-	0
ENSG00000108654	DDX5	0.146413	0.721761		4	39	0.102564	-	-	-	T	-	0
ENSG00000118507	AKAP7	0.146383	0.721761		5	39	0.128205	-	-	-	T	-	0
ENSG00000071242	RPS6KA2	0.147409	0.723203		10	39	0.25641	-	-	-	T	-	0	COSMIC:COSM21036,COSMIC:COSM290201,COSMIC:COSM290202,dbSNP:rs202226024
ENSG00000072518	MARK2	0.146859	0.723203		8	39	0.205128	-	-	-	T	-	0	dbSNP:rs200185863
ENSG00000115652	UXS1	0.147312	0.723203		5	39	0.128205	-	-	-	T	-	0
ENSG00000134982	APC	0.147265	0.723203		14	39	0.358974	-	-	-		-	1	ESP:TMP_ESP_5_112102941,dbSNP:rs200881543
ENSG00000169683	LRRC45	0.147444	0.723203		13	39	0.333333	-	-	-	T	-	0
ENSG00000136068	FLNB	0.147136	0.723203		17	39	0.435897	-	-	-		-	0	ESP:TMP_ESP_3_58107137
ENSG00000152229	PSTPIP2	0.147041	0.723203		7	39	0.179487	-	-	-	T	-	0
ENSG00000260916	CCPG1	0.147288	0.723203		5	39	0.128205	-	-	-	T	-	0
ENSG00000100031	GGT1	0.148108	0.724815		10	39	0.25641	-	-	-	T	-	0	dbSNP:rs200419006
ENSG00000182919	C11orf54	0.148142	0.724815		6	39	0.153846	-	-	-	T	-	0
ENSG00000102221	PHF16	0.147872	0.724815		2	39	0.0512821	-	-	-	T	-	0
ENSG00000179134	SAMD4B	0.148115	0.724815		13	39	0.333333	-	-	-		-	0	ESP:TMP_ESP_19_39876986,dbSNP:rs150133597
ENSG00000100982	PCIF1	0.148587	0.726368		10	39	0.25641	-	-	-	T	-	0
ENSG00000035681	NSMAF	0.148645	0.726368		10	39	0.25641	-	-	-		-	0
ENSG00000104643	MTMR9	0.14922	0.728725		9	39	0.230769	-	-	-	T	-	0	ESP:TMP_ESP_8_11188774,dbSNP:rs141311356
ENSG00000020577	SAMD4A	0.149365	0.728979		9	39	0.230769	-	-	-	T	-	0
ENSG00000179409	GEMIN4	0.149934	0.729049		4	39	0.102564	-	-	-	T	-	0
ENSG00000174374	WBSCR16	0.14971	0.729049		2	39	0.0512821	-	-	-	T	-	0	ESP:TMP_ESP_7_74470041
ENSG00000171174	RBKS	0.149615	0.729049		9	39	0.230769	-	-	-	T	-	0	dbSNP:rs201716905
ENSG00000078269	SYNJ2	0.149736	0.729049		13	39	0.333333	-	-	-		-	0	ESP:TMP_ESP_6_158484928,ESP:TMP_ESP_6_158485625
ENSG00000100526	CDKN3	0.149983	0.729049		2	39	0.0512821	-	-	-	T	-	0
ENSG00000117877	CD3EAP	0.149949	0.729049		9	39	0.230769	-	-	-		-	0	dbSNP:rs141279286
ENSG00000162482	AKR7A3	0.15003	0.729049		6	39	0.153846	-	-	-	T	-	0
ENSG00000167112	TRUB2	0.150377	0.730284		3	39	0.0769231	-	-	-	T	-	0
ENSG00000161847	RAVER1	0.151003	0.731353		10	39	0.25641	-	-	-	T	-	0	dbSNP:rs78259589
ENSG00000135018	UBQLN1	0.150803	0.731353		3	39	0.0769231	-	-	-	T	-	0
ENSG00000110330	BIRC2	0.151157	0.731353		2	39	0.0512821	-	-	-	T	-	0
ENSG00000124126	PREX1	0.150935	0.731353		23	39	0.589744	-	-	-		-	0	COSMIC:COSM189681,COSMIC:COSM189682,dbSNP:rs186606574
ENSG00000136842	TMOD1	0.151156	0.731353		14	39	0.358974	-	-	-	T	-	0
ENSG00000163635	ATXN7	0.150703	0.731353		9	39	0.230769	-	-	-		-	0
ENSG00000221890	NPTXR	0.151373	0.731802		7	39	0.179487	-	-	-	T	-	0
ENSG00000176973	FAM89B	0.151436	0.731802		3	39	0.0769231	-	-	-	T	-	0
ENSG00000167261	DPEP2	0.151897	0.733126		10	39	0.25641	-	-	-		-	0	dbSNP:rs202239509
ENSG00000090920	FCGBP	0.151826	0.733126		23	39	0.589744	-	-	-		-	0
ENSG00000108651	UTP6	0.152665	0.736224		6	39	0.153846	-	-	-	N	-	0
ENSG00000061936	SFSWAP	0.152727	0.736224		8	39	0.205128	-	-	-	T	-	0	dbSNP:rs1802607
ENSG00000153721	CNKSR3	0.152914	0.736674		6	39	0.153846	-	-	-	T	-	0	dbSNP:rs202110313
ENSG00000122728	TAF1L	0.153051	0.736883		15	39	0.384615	-	-	-		-	0	COSMIC:COSM167572,dbSNP:rs199906668
ENSG00000154059	IMPACT	0.153251	0.73739		5	39	0.128205	-	-	-	T	-	0
ENSG00000100815	TRIP11	0.153456	0.737927		5	39	0.128205	-	-	-	T	-	0
ENSG00000061676	NCKAP1	0.153662	0.738308		10	39	0.25641	-	-	-		-	0
ENSG00000083799	CYLD	0.153724	0.738308		8	39	0.205128	-	-	-	T	-	1
ENSG00000168769	TET2	0.154063	0.739484		18	39	0.461538	-	-	-		-	1
ENSG00000160551	TAOK1	0.155168	0.744333		10	39	0.25641	-	-	-	T	-	0
ENSG00000132535	DLG4	0.155819	0.74584		15	39	0.384615	-	-	-		-	0	ESP:TMP_ESP_17_7096836
ENSG00000196372	ASB13	0.155826	0.74584		5	39	0.128205	-	-	-	T	-	0
ENSG00000156110	ADK	0.155863	0.74584		6	39	0.153846	-	-	-	T	-	0
ENSG00000198182	ZNF607	0.155758	0.74584		7	39	0.179487	-	-	-		-	0
ENSG00000089234	BRAP	0.155996	0.746021		4	39	0.102564	-	-	-	T	-	0	COSMIC:COSM167825
ENSG00000106665	CLIP2	0.156844	0.748773		11	39	0.282051	-	-	-	N	-	0
ENSG00000066926	FECH	0.156858	0.748773		5	39	0.128205	-	-	-	T	-	0	ESP:TMP_ESP_18_55222051
ENSG00000196981	WDR5B	0.156689	0.748773		5	39	0.128205	-	-	-	T	-	0
ENSG00000186714	CCDC73	0.157176	0.749838		11	39	0.282051	-	-	-		-	0
ENSG00000138035	PNPT1	0.15735	0.75021		8	39	0.205128	-	-	-	T	-	0
ENSG00000112874	NUDT12	0.157591	0.750448		4	39	0.102564	-	-	-	T	-	0
ENSG00000131473	ACLY	0.157549	0.750448		15	39	0.384615	-	-	-		-	0
ENSG00000137076	TLN1	0.157986	0.751871		14	39	0.358974	2.14872	0.0158282	0.028349		[229,229]:2	0	COSMIC:COSM138710,dbSNP:rs142123677
ENSG00000162738	VANGL2	0.15833	0.753052		4	39	0.102564	-	-	-	T	-	0
ENSG00000178177	LCORL	0.158773	0.7547		12	39	0.307692	-	-	-		-	0
ENSG00000197381	ADARB1	0.159512	0.755924		8	39	0.205128	3.15308	0.000807776	0.00285098		[125,125]:2	0	dbSNP:rs139203173,dbSNP:rs200567642
ENSG00000165501	LRR1	0.159462	0.755924		2	39	0.0512821	-	-	-	T	-	0
ENSG00000181481	RNF135	0.159235	0.755924		3	39	0.0769231	-	-	-	T	-	0	ESP:TMP_ESP_17_29325916
ENSG00000134070	IRAK2	0.15935	0.755924		10	39	0.25641	-	-	-	T	-	0	dbSNP:rs112190415
ENSG00000138286	FAM149B1	0.159444	0.755924		7	39	0.179487	-	-	-	T	-	0	dbSNP:rs141525016
ENSG00000186716	BCR	0.159811	0.756885		11	39	0.282051	-	-	-	T	-	0
ENSG00000172775	FAM192A	0.160121	0.757655		6	39	0.153846	-	-	-	T	-	0
ENSG00000143398	PIP5K1A	0.160167	0.757655		9	39	0.230769	-	-	-		-	0
ENSG00000105088	OLFM2	0.160566	0.759056		2	39	0.0512821	-	-	-	T	-	0
ENSG00000070444	MNT	0.160657	0.759056		8	39	0.205128	-	-	-	N	-	0	dbSNP:rs141569229
ENSG00000111615	KRR1	0.160762	0.759097		2	39	0.0512821	-	-	-	T	-	0
ENSG00000156508	EEF1A1	0.160878	0.759187		4	39	0.102564	-	-	-	T	-	0
ENSG00000144445	KANSL1L	0.161459	0.760503		7	39	0.179487	-	-	-		-	0
ENSG00000132466	ANKRD17	0.161576	0.760503		12	39	0.307692	-	-	-		-	0	dbSNP:rs181169659
ENSG00000176809	LRRC37A3	0.161277	0.760503		6	39	0.153846	-	-	-		-	0
ENSG00000115935	WIPF1	0.161506	0.760503		11	39	0.282051	-	-	-		-	0
ENSG00000137941	TTLL7	0.161642	0.760503		13	39	0.333333	-	-	-	T	-	0
ENSG00000130052	STARD8	0.161776	0.760675		10	39	0.25641	-	-	-	T	-	0	ESP:TMP_ESP_X_67943711
ENSG00000015479	MATR3	0.162196	0.761806		6	39	0.153846	-	-	-	T	-	0
ENSG00000188554	NBR1	0.16221	0.761806		9	39	0.230769	-	-	-		-	0
ENSG00000170581	STAT2	0.162329	0.761905		14	39	0.358974	-	-	-	T	-	0
ENSG00000130723	PRRC2B	0.16247	0.762112		17	39	0.435897	-	-	-		-	0	dbSNP:rs201712590
ENSG00000197111	PCBP2	0.162702	0.762747		11	39	0.282051	-	-	-	T	-	0	dbSNP:rs201893804
ENSG00000184014	DENND5A	0.16327	0.76495		10	39	0.25641	-	-	-		-	0
ENSG00000082213	C5orf22	0.163426	0.765225		7	39	0.179487	-	-	-	T	-	0
ENSG00000166783	KIAA0430	0.163704	0.765718		11	39	0.282051	-	-	-	T	-	0	dbSNP:rs200582881
ENSG00000166963	MAP1A	0.163727	0.765718		20	39	0.512821	-	-	-		-	1	dbSNP:rs199600508
ENSG00000196812	ZSCAN16	0.163985	0.766469		2	39	0.0512821	-	-	-	T	-	0
ENSG00000172264	MACROD2	0.164562	0.768252		21	39	0.538462	-	-	-		-	0	COSMIC:COSM239887,dbSNP:rs6033944
ENSG00000171970	ZNF57	0.16452	0.768252		6	39	0.153846	-	-	-		-	0	dbSNP:rs143668692,dbSNP:rs199768041
ENSG00000144659	SLC25A38	0.165369	0.769727		4	39	0.102564	-	-	-	T	-	0
ENSG00000144218	AFF3	0.165142	0.769727		26	39	0.666667	0.736341	0.230762	0.237694		[862,862]:2	0	ESP:TMP_ESP_2_100623202,dbSNP:rs140781377,dbSNP:rs141393091,dbSNP:rs199759675
ENSG00000116213	WRAP73	0.165339	0.769727		7	39	0.179487	-	-	-	T	-	0
ENSG00000143127	ITGA10	0.165201	0.769727		20	39	0.512821	-	-	-		-	0	COSMIC:COSM123790,dbSNP:rs199533163
ENSG00000072134	EPN2	0.165354	0.769727		11	39	0.282051	-	-	-		-	0
ENSG00000115977	AAK1	0.165668	0.770663		13	39	0.333333	-	-	-		-	0	dbSNP:rs140707931
ENSG00000175806	MSRA	0.167009	0.771203		6	39	0.153846	-	-	-	T	-	0
ENSG00000152465	NMT2	0.166979	0.771203		7	39	0.179487	-	-	-	T	-	0
ENSG00000145949	MYLK4	0.166421	0.771203		9	39	0.230769	-	-	-	T	-	0
ENSG00000151287	TEX30	0.166102	0.771203		3	39	0.0769231	-	-	-	T	-	0
ENSG00000115993	TRAK2	0.166554	0.771203		9	39	0.230769	-	-	-		-	0	COSMIC:COSM209560
ENSG00000165416	SUGT1	0.165901	0.771203		6	39	0.153846	-	-	-	T	-	0
ENSG00000134759	ELP2	0.166163	0.771203		6	39	0.153846	-	-	-	T	-	0
ENSG00000188177	ZC3H6	0.166579	0.771203		15	39	0.384615	1.23567	0.108291	0.126164		[407,407]:2	0	COSMIC:COSM286634,ESP:TMP_ESP_2_113080289
ENSG00000169499	PLEKHA2	0.167048	0.771203		15	39	0.384615	3.46381	0.000266294	0.00285098		[348,353]:3	0
ENSG00000148516	ZEB1	0.166965	0.771203		16	39	0.410256	-	-	-		-	0	dbSNP:rs149699119
ENSG00000127507	EMR2	0.166921	0.771203		12	39	0.307692	2.56721	0.00512607	0.0111842		[98,98]:2	0
ENSG00000162572	SCNN1D	0.166524	0.771203		19	39	0.487179	-	-	-		-	0	dbSNP:rs139170280,dbSNP:rs150828810
ENSG00000073331	ALPK1	0.167063	0.771203		17	39	0.435897	-	-	-		-	0	ESP:TMP_ESP_4_113359739
ENSG00000168393	DTYMK	0.167408	0.771889		5	39	0.128205	-	-	-	T	-	0
ENSG00000029534	ANK1	0.167404	0.771889		21	39	0.538462	-	-	-		-	0	ESP:TMP_ESP_8_41573153
ENSG00000076928	ARHGEF1	0.167518	0.77194		15	39	0.384615	1.83486	0.0332632	0.0498948		[13,13]:2	0
ENSG00000186185	KIF18B	0.167688	0.772271		9	39	0.230769	-	-	-	T	-	0	dbSNP:rs199959814
ENSG00000163386	NBPF10	0.16793	0.772479		3	39	0.0769231	-	-	-	T	-	1
ENSG00000103056	SMPD3	0.167895	0.772479		6	39	0.153846	-	-	-	T	-	0
ENSG00000161813	LARP4	0.168274	0.773607		9	39	0.230769	-	-	-	T	-	0
ENSG00000131471	AOC3	0.168503	0.774204		10	39	0.25641	-	-	-		-	0	COSMIC:COSM215688,COSMIC:COSM215689,ESP:TMP_ESP_17_41004682
ENSG00000183579	ZNRF3	0.168675	0.774542		7	39	0.179487	-	-	-	T	-	0
ENSG00000122435	TRMT13	0.168834	0.774821		6	39	0.153846	-	-	-	T	-	0
ENSG00000132424	PNISR	0.169492	0.777382		7	39	0.179487	-	-	-	T	-	0	dbSNP:rs183045012
ENSG00000137747	TMPRSS13	0.170228	0.779592		8	39	0.205128	-	-	-		-	0	dbSNP:rs201369736,dbSNP:rs61900347,dbSNP:rs75037497
ENSG00000132670	PTPRA	0.170272	0.779592		19	39	0.487179	3.15308	0.000807776	0.00285098		[683,683]:2	0	dbSNP:rs73892692
ENSG00000196227	FAM217B	0.170243	0.779592		10	39	0.25641	-	-	-	T	-	0
ENSG00000173264	GPR137	0.1712	0.779744		10	39	0.25641	-	-	-	T	-	0	dbSNP:rs149311005,dbSNP:rs57301737
ENSG00000115504	EHBP1	0.170557	0.779744		12	39	0.307692	-	-	-		-	0
ENSG00000221963	APOL6	0.171084	0.779744		6	39	0.153846	-	-	-	T	-	0
ENSG00000184465	WDR27	0.171158	0.779744		17	39	0.435897	2.14872	0.0158282	0.028349		[788,788]:2	0	ESP:TMP_ESP_6_170088863,dbSNP:rs201047626
ENSG00000175137	SH3BP5L	0.170644	0.779744		4	39	0.102564	-	-	-	T	-	0
ENSG00000167548	MLL2	0.17101	0.779744		31	39	0.794872	1.22885	0.109563	0.12703		[3183,3184]:3,[4928,4928]:2	1	COSMIC:COSM268501,COSMIC:COSM268502,COSMIC:COSM30383,ESP:TMP_ESP_12_49420254,ESP:TMP_ESP_12_49444920,ESP:TMP_ESP_12_49445976,dbSNP:rs200089754
ENSG00000165424	ZCCHC24	0.1709	0.779744		7	39	0.179487	-	-	-	T	-	0	dbSNP:rs138062570
ENSG00000069329	VPS35	0.171152	0.779744		8	39	0.205128	-	-	-	T	-	0
ENSG00000135426	TESPA1	0.170757	0.779744		12	39	0.307692	-	-	-		-	0	ESP:TMP_ESP_12_55356792
ENSG00000179941	BBS10	0.171446	0.780412		2	39	0.0512821	-	-	-	T	-	0
ENSG00000237441	RGL2	0.172297	0.781608		12	39	0.307692	-	-	-		-	0
ENSG00000137168	PPIL1	0.172079	0.781608		6	39	0.153846	-	-	-	T	-	0
ENSG00000197323	TRIM33	0.172266	0.781608		10	39	0.25641	-	-	-	T	-	0
ENSG00000178397	FAM220A	0.171904	0.781608		4	39	0.102564	-	-	-	T	-	0
ENSG00000176715	ACSF3	0.172307	0.781608		4	39	0.102564	-	-	-	T	-	0	dbSNP:rs138680796
ENSG00000160271	RALGDS	0.172084	0.781608		16	39	0.410256	-	-	-		-	0	ESP:TMP_ESP_9_135975658,dbSNP:rs143388456,dbSNP:rs200022661
ENSG00000146592	CREB5	0.172654	0.782729		13	39	0.333333	-	-	-	T	-	0
ENSG00000128805	ARHGAP22	0.172904	0.78341		10	39	0.25641	-	-	-		-	0
ENSG00000065978	YBX1	0.173273	0.784631		4	39	0.102564	-	-	-	T	-	0
ENSG00000198722	UNC13B	0.174807	0.784726		12	39	0.307692	-	-	-		-	0
ENSG00000163644	PPM1K	0.175173	0.784726		8	39	0.205128	-	-	-	T	-	0
ENSG00000197728	RPS26	0.173846	0.784726		2	39	0.0512821	-	-	-	T	-	0
ENSG00000214226	C17orf67	0.175318	0.784726		4	39	0.102564	-	-	-	T	-	0
ENSG00000204186	ZDBF2	0.174462	0.784726		15	39	0.384615	-	-	-		-	0	dbSNP:rs200714906
ENSG00000196305	IARS	0.175356	0.784726		17	39	0.435897	-	-	-		-	0	ESP:TMP_ESP_9_95004401
ENSG00000008869	HEATR5B	0.174774	0.784726		12	39	0.307692	-	-	-		-	0
ENSG00000151148	UBE3B	0.17548	0.784726		13	39	0.333333	-	-	-		-	0
ENSG00000107959	PITRM1	0.174518	0.784726		12	39	0.307692	-	-	-		-	1	ESP:TMP_ESP_10_3208440,dbSNP:rs199659476
ENSG00000140694	PARN	0.174414	0.784726		11	39	0.282051	-	-	-	T	-	0	dbSNP:rs199652820
ENSG00000035403	VCL	0.174442	0.784726		10	39	0.25641	-	-	-		-	0
ENSG00000109790	KLHL5	0.17451	0.784726		7	39	0.179487	-	-	-	T	-	0
ENSG00000130201	EXOC3L2	0.175001	0.784726		9	39	0.230769	-	-	-	T	-	0	ESP:TMP_ESP_19_45731005
ENSG00000123636	BAZ2B	0.173852	0.784726		20	39	0.512821	-	-	-		-	0	ESP:TMP_ESP_2_160304771,dbSNP:rs201954497
ENSG00000166822	TMEM170A	0.174817	0.784726		3	39	0.0769231	-	-	-	T	-	0
ENSG00000204304	PBX2	0.173662	0.784726		9	39	0.230769	-	-	-	T	-	0
ENSG00000136709	WDR33	0.173549	0.784726		13	39	0.333333	-	-	-		-	0	COSMIC:COSM289815
ENSG00000128607	KLHDC10	0.175495	0.784726		6	39	0.153846	-	-	-	T	-	0
ENSG00000101901	ALG13	0.174401	0.784726		9	39	0.230769	-	-	-		-	0	ESP:TMP_ESP_X_110931170
ENSG00000132357	CARD6	0.174824	0.784726		6	39	0.153846	-	-	-		-	0	COSMIC:COSM14007
ENSG00000115806	GORASP2	0.17495	0.784726		4	39	0.102564	-	-	-	T	-	0	dbSNP:rs139829101
ENSG00000155729	KCTD18	0.173551	0.784726		3	39	0.0769231	-	-	-	T	-	0
ENSG00000148843	PDCD11	0.175938	0.785366		21	39	0.538462	-	-	-		-	0
ENSG00000123933	MXD4	0.175833	0.785366		5	39	0.128205	-	-	-	T	-	0	dbSNP:rs36024893
ENSG00000171962	LRRC48	0.175939	0.785366		11	39	0.282051	-	-	-	T	-	0	dbSNP:rs17853022
ENSG00000126870	WDR60	0.17651	0.786126		10	39	0.25641	-	-	-	T	-	0	dbSNP:rs200851215
ENSG00000205978	NYNRIN	0.176269	0.786126		14	39	0.358974	-	-	-		-	0	ESP:TMP_ESP_14_24884459
ENSG00000169398	PTK2	0.176417	0.786126		16	39	0.410256	-	-	-		-	0	dbSNP:rs13251272
ENSG00000166912	MTMR10	0.176414	0.786126		6	39	0.153846	-	-	-	T	-	0
ENSG00000143258	USP21	0.176847	0.786238		17	39	0.435897	-	-	-		-	0
ENSG00000149932	TMEM219	0.176674	0.786238		7	39	0.179487	-	-	-	T	-	0
ENSG00000012232	EXTL3	0.17678	0.786238		5	39	0.128205	-	-	-	T	-	0
ENSG00000142303	ADAMTS10	0.176936	0.786238		23	39	0.589744	1.83486	0.0332632	0.0498948		[1085,1085]:3	0	ESP:TMP_ESP_19_8656816,ESP:TMP_ESP_19_8668747,dbSNP:rs200682034
ENSG00000117984	CTSD	0.177284	0.787316		7	39	0.179487	-	-	-	T	-	0	ESP:TMP_ESP_11_1776167,dbSNP:rs112184520
ENSG00000075884	ARHGAP15	0.177379	0.787316		16	39	0.410256	-	-	-		-	0	ESP:TMP_ESP_2_144276815
ENSG00000075711	DLG1	0.177693	0.787406		7	39	0.179487	-	-	-	T	-	0
ENSG00000168781	PPIP5K1	0.177701	0.787406		22	39	0.564103	-	-	-	T	-	0	ESP:TMP_ESP_15_43891200,dbSNP:rs147963245,dbSNP:rs147990592
ENSG00000163781	TOPBP1	0.177609	0.787406		6	39	0.153846	-	-	-		-	0
ENSG00000031003	FAM13B	0.178529	0.790629		6	39	0.153846	-	-	-	T	-	0
ENSG00000120539	MASTL	0.178727	0.790633		14	39	0.358974	2.14872	0.0158282	0.028349		[574,574]:2	0
ENSG00000090520	DNAJB11	0.178784	0.790633		7	39	0.179487	-	-	-	T	-	0
ENSG00000213654	GPSM3	0.178832	0.790633		9	39	0.230769	-	-	-	T	-	0
ENSG00000176020	AMIGO3	0.179224	0.791918		10	39	0.25641	-	-	-	T	-	0
ENSG00000084093	REST	0.17965	0.793025		8	39	0.205128	-	-	-		-	0
ENSG00000121289	CEP89	0.179677	0.793025		17	39	0.435897	-	-	-		-	0	dbSNP:rs113325124,dbSNP:rs147944146
ENSG00000149639	SOGA1	0.180179	0.794348		16	39	0.410256	-	-	-		-	0	ESP:TMP_ESP_20_35444351,dbSNP:rs6029806
ENSG00000134014	ELP3	0.180089	0.794348		7	39	0.179487	-	-	-	T	-	0	ESP:TMP_ESP_8_27989846
ENSG00000144589	STK11IP	0.180688	0.796109		21	39	0.538462	-	-	-		-	0
ENSG00000162300	ZFPL1	0.181072	0.796109		7	39	0.179487	-	-	-	T	-	0	COSMIC:COSM73367,dbSNP:rs146503449
ENSG00000143476	DTL	0.181896	0.796109		8	39	0.205128	-	-	-	T	-	0
ENSG00000175573	C11orf68	0.181909	0.796109		6	39	0.153846	-	-	-	T	-	0
ENSG00000182985	CADM1	0.181175	0.796109		3	39	0.0769231	-	-	-	T	-	0
ENSG00000094880	CDC23	0.180903	0.796109		10	39	0.25641	-	-	-	T	-	0	ESP:TMP_ESP_5_137537851
ENSG00000189159	HN1	0.18081	0.796109		2	39	0.0512821	-	-	-	T	-	0
ENSG00000182054	IDH2	0.181825	0.796109		4	39	0.102564	-	-	-	T	-	1
ENSG00000127980	PEX1	0.181695	0.796109		12	39	0.307692	-	-	-		-	0	dbSNP:rs141509344,dbSNP:rs199963036
ENSG00000145348	TBCK	0.181911	0.796109		11	39	0.282051	-	-	-	T	-	0
ENSG00000111667	USP5	0.18136	0.796109		15	39	0.384615	-	-	-	T	-	0	dbSNP:rs188377905
ENSG00000163002	NUP35	0.182	0.796109		7	39	0.179487	-	-	-	T	-	0
ENSG00000066697	MSANTD3	0.181579	0.796109		3	39	0.0769231	-	-	-	T	-	0
ENSG00000133275	CSNK1G2	0.181767	0.796109		8	39	0.205128	-	-	-	T	-	0	ESP:TMP_ESP_19_1978370
ENSG00000006715	VPS41	0.182412	0.797147		12	39	0.307692	-	-	-	T	-	0
ENSG00000088930	XRN2	0.18244	0.797147		10	39	0.25641	-	-	-	T	-	0
ENSG00000145194	ECE2	0.182785	0.798208		23	39	0.589744	-	-	-		-	0	dbSNP:rs200812899
ENSG00000143801	PSEN2	0.182992	0.798222		18	39	0.461538	-	-	-	N	-	0	dbSNP:rs141577748,dbSNP:rs145400391,dbSNP:rs200358385
ENSG00000186951	PPARA	0.182963	0.798222		11	39	0.282051	-	-	-	T	-	0	COSMIC:COSM140891
ENSG00000121749	TBC1D15	0.18331	0.799166		7	39	0.179487	-	-	-	T	-	0
ENSG00000100099	HPS4	0.183779	0.799661		12	39	0.307692	-	-	-		-	0	dbSNP:rs2331251
ENSG00000090060	PAPOLA	0.183803	0.799661		8	39	0.205128	-	-	-	T	-	0
ENSG00000070413	DGCR2	0.18365	0.799661		5	39	0.128205	-	-	-	T	-	0	ESP:TMP_ESP_22_19028673
ENSG00000156162	DPY19L4	0.183831	0.799661		6	39	0.153846	-	-	-	T	-	0
ENSG00000166233	ARIH1	0.183969	0.799815		4	39	0.102564	-	-	-	T	-	0
ENSG00000050555	LAMC3	0.184301	0.800814		20	39	0.512821	1.23567	0.108291	0.126164		[237,237]:2	0	ESP:TMP_ESP_9_133914467,dbSNP:rs145287578
ENSG00000125633	CCDC93	0.184691	0.801624		12	39	0.307692	-	-	-	T	-	0	ESP:TMP_ESP_2_118704342
ENSG00000074696	PTPLAD1	0.184674	0.801624		5	39	0.128205	-	-	-	T	-	0
ENSG00000152583	SPARCL1	0.184915	0.802152		10	39	0.25641	-	-	-	T	-	0
ENSG00000144048	DUSP11	0.185239	0.803112		4	39	0.102564	-	-	-	T	-	0	COSMIC:COSM110298,dbSNP:rs140629191
ENSG00000113360	DROSHA	0.185747	0.804871		20	39	0.512821	-	-	-		-	0	ESP:TMP_ESP_5_31511327,dbSNP:rs199515305
ENSG00000163714	U2SURP	0.186137	0.806113		13	39	0.333333	5.49659	1.936e-08	1.5488e-06		[510,510]:2,[937,937]:2	0
ENSG00000083123	BCKDHB	0.186502	0.807251		9	39	0.230769	-	-	-	T	-	0
ENSG00000122966	CIT	0.186862	0.808361		19	39	0.487179	-	-	-		-	0	ESP:TMP_ESP_12_120150372
ENSG00000111801	BTN3A3	0.187211	0.808502		6	39	0.153846	-	-	-	T	-	0
ENSG00000128228	SDF2L1	0.188018	0.808502		2	39	0.0512821	-	-	-	T	-	0
ENSG00000113758	DBN1	0.187049	0.808502		11	39	0.282051	-	-	-		-	0
ENSG00000167840	ZNF232	0.188132	0.808502		5	39	0.128205	-	-	-	T	-	0
ENSG00000145723	GIN1	0.187671	0.808502		3	39	0.0769231	-	-	-	T	-	0
ENSG00000167193	CRK	0.187481	0.808502		4	39	0.102564	-	-	-	T	-	0	ESP:TMP_ESP_17_1370540
ENSG00000107863	ARHGAP21	0.187815	0.808502		11	39	0.282051	-	-	-		-	0	ESP:TMP_ESP_10_24908514
ENSG00000147576	ADHFE1	0.18794	0.808502		9	39	0.230769	-	-	-	T	-	0
ENSG00000135451	TROAP	0.188066	0.808502		14	39	0.358974	-	-	-		-	0	dbSNP:rs139479639
ENSG00000121897	LIAS	0.187462	0.808502		8	39	0.205128	-	-	-	T	-	0
ENSG00000134909	ARHGAP32	0.187244	0.808502		9	39	0.230769	-	-	-		-	0
ENSG00000084652	TXLNA	0.188054	0.808502		5	39	0.128205	-	-	-		-	0
ENSG00000119927	GPAM	0.188763	0.808717		4	39	0.102564	-	-	-	T	-	0
ENSG00000127314	RAP1B	0.188528	0.808717		2	39	0.0512821	-	-	-	T	-	0
ENSG00000153201	RANBP2	0.188738	0.808717		13	39	0.333333	-	-	-		-	0	dbSNP:rs201380436
ENSG00000114021	NIT2	0.1888	0.808717		6	39	0.153846	-	-	-	T	-	0
ENSG00000135698	MPHOSPH6	0.188488	0.808717		2	39	0.0512821	-	-	-	T	-	0
ENSG00000119922	IFIT2	0.188338	0.808717		2	39	0.0512821	-	-	-	T	-	0
ENSG00000158714	SLAMF8	0.189267	0.809392		4	39	0.102564	-	-	-	T	-	0
ENSG00000010327	STAB1	0.18914	0.809392		24	39	0.615385	-	-	-		-	0	COSMIC:COSM141047,ESP:TMP_ESP_3_52550419,dbSNP:rs185630005
ENSG00000133048	CHI3L1	0.189185	0.809392		9	39	0.230769	-	-	-	T	-	0	ESP:TMP_ESP_1_203152955
ENSG00000138698	RAP1GDS1	0.189611	0.809977		3	39	0.0769231	-	-	-	T	-	0
ENSG00000110066	SUV420H1	0.189594	0.809977		9	39	0.230769	-	-	-		-	0	COSMIC:COSM136020,ESP:TMP_ESP_11_67926444
ENSG00000091622	PITPNM3	0.190128	0.811089		10	39	0.25641	-	-	-	T	-	0	dbSNP:rs188803766
ENSG00000197136	PCNXL3	0.190181	0.811089		21	39	0.538462	-	-	-		-	0	ESP:TMP_ESP_11_65394479,ESP:TMP_ESP_11_65395090,ESP:TMP_ESP_11_65402975,ESP:TMP_ESP_11_65404364,ESP:TMP_ESP_11_65408597
ENSG00000151150	ANK3	0.190044	0.811089		25	39	0.641026	-	-	-		-	1	ESP:TMP_ESP_10_61828569
ENSG00000160818	GPATCH4	0.190511	0.812054		7	39	0.179487	-	-	-	T	-	0	ESP:TMP_ESP_1_156571247
ENSG00000187790	FANCM	0.190742	0.812596		15	39	0.384615	-	-	-		-	0	ESP:TMP_ESP_14_45665470
ENSG00000175662	TOM1L2	0.190858	0.812648		10	39	0.25641	-	-	-	T	-	0
ENSG00000127329	PTPRB	0.191383	0.812891		21	39	0.538462	-	-	-		-	0	ESP:TMP_ESP_12_70932778,ESP:TMP_ESP_12_71016404
ENSG00000091483	FH	0.191537	0.812891		8	39	0.205128	-	-	-	T	-	0	ESP:TMP_ESP_1_241661200
ENSG00000055332	EIF2AK2	0.191058	0.812891		6	39	0.153846	-	-	-	T	-	0
ENSG00000036054	TBC1D23	0.191483	0.812891		9	39	0.230769	-	-	-	T	-	0	ESP:TMP_ESP_3_100025257
ENSG00000198689	SLC9A6	0.191373	0.812891		3	39	0.0769231	-	-	-	T	-	0
ENSG00000168883	USP39	0.191245	0.812891		9	39	0.230769	-	-	-	T	-	0
ENSG00000005187	ACSM3	0.192806	0.817836		16	39	0.410256	-	-	-	T	-	0	ESP:TMP_ESP_16_20683018
ENSG00000152443	ZNF776	0.193228	0.81918		5	39	0.128205	-	-	-	T	-	0
ENSG00000130787	HIP1R	0.193434	0.819614		16	39	0.410256	-	-	-	T	-	0	dbSNP:rs142435037
ENSG00000185753	CXorf38	0.19399	0.821082		2	39	0.0512821	-	-	-	T	-	0
ENSG00000069188	SDK2	0.193904	0.821082		25	39	0.641026	-	-	-		-	0	COSMIC:COSM263556,ESP:TMP_ESP_17_71411969,ESP:TMP_ESP_17_71415387,ESP:TMP_ESP_17_71426731
ENSG00000141141	DDX52	0.194219	0.821605		6	39	0.153846	-	-	-	T	-	0
ENSG00000172830	SSH3	0.194598	0.822768		13	39	0.333333	-	-	-	N	-	0	dbSNP:rs146864089
ENSG00000145743	FBXL17	0.194703	0.822768		4	39	0.102564	-	-	-	T	-	0
ENSG00000106333	PCOLCE	0.194879	0.823068		8	39	0.205128	-	-	-	T	-	0	ESP:TMP_ESP_7_100205180,dbSNP:rs200861015
ENSG00000124532	MRS2	0.195069	0.823424		5	39	0.128205	-	-	-	T	-	0	ESP:TMP_ESP_6_24423296,dbSNP:rs200245617
ENSG00000072415	MPP5	0.195608	0.82393		5	39	0.128205	-	-	-	T	-	0
ENSG00000115825	PRKD3	0.195535	0.82393		9	39	0.230769	-	-	-	N	-	0
ENSG00000143198	MGST3	0.195607	0.82393		3	39	0.0769231	-	-	-	T	-	0
ENSG00000111670	GNPTAB	0.195577	0.82393		7	39	0.179487	-	-	-	T	-	0
ENSG00000136710	CCDC115	0.196296	0.826382		12	39	0.307692	-	-	-	T	-	0
ENSG00000214706	IFRD2	0.19654	0.826964		11	39	0.282051	-	-	-	T	-	0	ESP:TMP_ESP_3_50327738
ENSG00000198205	ZXDA	0.196668	0.82706		2	39	0.0512821	-	-	-	T	-	0
ENSG00000139514	SLC7A1	0.196937	0.827747		7	39	0.179487	-	-	-		-	0
ENSG00000019991	HGF	0.197453	0.828688		17	39	0.435897	-	-	-		-	0	dbSNP:rs147312555
ENSG00000162702	ZNF281	0.198006	0.828688		9	39	0.230769	-	-	-		-	0
ENSG00000152256	PDK1	0.197775	0.828688		9	39	0.230769	-	-	-	T	-	0
ENSG00000103540	CCP110	0.197647	0.828688		9	39	0.230769	-	-	-		-	0
ENSG00000154945	ANKRD40	0.197867	0.828688		5	39	0.128205	-	-	-	T	-	0
ENSG00000196235	SUPT5H	0.197826	0.828688		16	39	0.410256	-	-	-		-	0	ESP:TMP_ESP_19_39949617
ENSG00000112715	VEGFA	0.198002	0.828688		5	39	0.128205	-	-	-	T	-	0
ENSG00000160055	TMEM234	0.197888	0.828688		17	39	0.435897	-	-	-	T	-	0	ESP:TMP_ESP_1_32687979,ESP:TMP_ESP_1_32689747
ENSG00000116584	ARHGEF2	0.198175	0.828952		17	39	0.435897	-	-	-	T	-	0
ENSG00000169239	CA5B	0.198579	0.829314		5	39	0.128205	-	-	-	T	-	0
ENSG00000119004	CYP20A1	0.198464	0.829314		9	39	0.230769	-	-	-	T	-	0
ENSG00000119820	YIPF4	0.198535	0.829314		5	39	0.128205	-	-	-	T	-	0
ENSG00000183576	SETD3	0.198923	0.830312		5	39	0.128205	-	-	-	T	-	0
ENSG00000140326	CDAN1	0.199242	0.830874		13	39	0.333333	-	-	-	T	-	0
ENSG00000178202	KDELC2	0.19927	0.830874		5	39	0.128205	-	-	-	T	-	0
ENSG00000165688	PMPCA	0.199438	0.831115		8	39	0.205128	-	-	-	T	-	0	ESP:TMP_ESP_9_139306981
ENSG00000157350	ST3GAL2	0.19954	0.831115		4	39	0.102564	-	-	-	T	-	0
ENSG00000196914	ARHGEF12	0.199771	0.831637		16	39	0.410256	-	-	-		-	0	dbSNP:rs202017124
ENSG00000151623	NR3C2	0.199983	0.831739		9	39	0.230769	-	-	-		-	0
ENSG00000064652	SNX24	0.200008	0.831739		5	39	0.128205	-	-	-	T	-	0
ENSG00000124570	SERPINB6	0.200443	0.833109		5	39	0.128205	-	-	-	T	-	0
ENSG00000012660	ELOVL5	0.200667	0.833597		4	39	0.102564	-	-	-	T	-	0
ENSG00000125779	PANK2	0.200947	0.833866		5	39	0.128205	-	-	-	T	-	0
ENSG00000187240	DYNC2H1	0.20095	0.833866		26	39	0.666667	-	-	-		-	0	dbSNP:rs201076231
ENSG00000184545	DUSP8	0.201051	0.833866		7	39	0.179487	-	-	-	T	-	0
ENSG00000023228	NDUFS1	0.201318	0.834533		2	39	0.0512821	-	-	-	T	-	0
ENSG00000168502	SOGA2	0.201923	0.836597		17	39	0.435897	-	-	-		-	0	ESP:TMP_ESP_18_8825902,dbSNP:rs149764588
ENSG00000114331	ACAP2	0.202331	0.837847		13	39	0.333333	-	-	-		-	0	ESP:TMP_ESP_3_195017896
ENSG00000114670	NEK11	0.202599	0.838514		12	39	0.307692	-	-	-		-	0
ENSG00000147316	MCPH1	0.202787	0.838543		10	39	0.25641	-	-	-	T	-	0
ENSG00000090432	MUL1	0.20282	0.838543		5	39	0.128205	-	-	-	T	-	0
ENSG00000164144	ARFIP1	0.20298	0.838763		4	39	0.102564	-	-	-	T	-	0
ENSG00000080845	DLGAP4	0.203164	0.839081		12	39	0.307692	-	-	-		-	0
ENSG00000217128	FNIP1	0.203527	0.840138		19	39	0.487179	-	-	-		-	0	ESP:TMP_ESP_5_130764577
ENSG00000116824	CD2	0.20388	0.840536		11	39	0.282051	-	-	-		-	0
ENSG00000072736	NFATC3	0.203964	0.840536		10	39	0.25641	-	-	-	T	-	0	ESP:TMP_ESP_16_68260395
ENSG00000149328	GLB1L2	0.204052	0.840536		18	39	0.461538	-	-	-		-	0
ENSG00000134324	LPIN1	0.204037	0.840536		12	39	0.307692	-	-	-		-	0
ENSG00000176853	FAM91A1	0.204282	0.841042		11	39	0.282051	-	-	-	T	-	0	ESP:TMP_ESP_8_124811968
ENSG00000173825	TIGD3	0.205097	0.841176		6	39	0.153846	-	-	-	T	-	0
ENSG00000125304	TM9SF2	0.204898	0.841176		4	39	0.102564	-	-	-	T	-	0
ENSG00000158825	CDA	0.204786	0.841176		4	39	0.102564	-	-	-	T	-	0
ENSG00000182752	PAPPA	0.205003	0.841176		26	39	0.666667	-	-	-		-	0	dbSNP:rs145638141
ENSG00000197386	HTT	0.205137	0.841176		26	39	0.666667	0.809575	0.209092	0.220097		[1645,1645]:2	0	ESP:TMP_ESP_4_3158773
ENSG00000085265	FCN1	0.20528	0.841176		11	39	0.282051	-	-	-		-	0	dbSNP:rs139969832
ENSG00000104365	IKBKB	0.204657	0.841176		7	39	0.179487	-	-	-	T	-	0
ENSG00000108557	RAI1	0.20521	0.841176		12	39	0.307692	-	-	-		-	0	ESP:TMP_ESP_17_17700872,ESP:TMP_ESP_17_17701697,dbSNP:rs147375487,dbSNP:rs200367247
ENSG00000100596	SPTLC2	0.20465	0.841176		10	39	0.25641	-	-	-		-	0
ENSG00000104728	ARHGEF10	0.205585	0.841547		8	39	0.205128	-	-	-		-	0	dbSNP:rs146139864
ENSG00000180357	ZNF609	0.205527	0.841547		9	39	0.230769	3.15308	0.000807776	0.00285098		[225,225]:2	0
ENSG00000075420	FNDC3B	0.205831	0.841855		7	39	0.179487	-	-	-		-	0	dbSNP:rs200014738
ENSG00000254122	PCDHGB7	0.205875	0.841855		26	39	0.666667	-	-	-		-	0	COSMIC:COSM205280,dbSNP:rs138641753,dbSNP:rs142995927,dbSNP:rs188787674,dbSNP:rs202046219
ENSG00000163686	ABHD6	0.206103	0.842347		7	39	0.179487	-	-	-	T	-	0
ENSG00000164209	SLC25A46	0.206633	0.844072		3	39	0.0769231	-	-	-	T	-	0	dbSNP:rs200252329
ENSG00000157106	SMG1	0.207549	0.847374		13	39	0.333333	-	-	-		-	0
ENSG00000114353	GNAI2	0.208173	0.847858		7	39	0.179487	-	-	-	T	-	0
ENSG00000136141	LRCH1	0.208462	0.847858		10	39	0.25641	-	-	-	T	-	0
ENSG00000167371	PRRT2	0.208532	0.847858		6	39	0.153846	-	-	-	T	-	0
ENSG00000134198	TSPAN2	0.208447	0.847858		6	39	0.153846	-	-	-	T	-	0
ENSG00000100321	SYNGR1	0.208072	0.847858		8	39	0.205128	-	-	-	T	-	0	dbSNP:rs200826085
ENSG00000104043	ATP8B4	0.20832	0.847858		18	39	0.461538	-	-	-		-	0	ESP:TMP_ESP_15_50254191,ESP:TMP_ESP_15_50254258
ENSG00000136878	USP20	0.208191	0.847858		14	39	0.358974	-	-	-	T	-	0
ENSG00000164048	ZNF589	0.208487	0.847858		5	39	0.128205	-	-	-	T	-	0	ESP:TMP_ESP_3_48336682
ENSG00000119508	NR4A3	0.208862	0.84876		4	39	0.102564	-	-	-	T	-	0
ENSG00000148848	ADAM12	0.209048	0.849075		20	39	0.512821	2.14872	0.0158282	0.028349		[231,231]:2	0
ENSG00000105607	GCDH	0.209362	0.849472		12	39	0.307692	-	-	-	T	-	0	ESP:TMP_ESP_19_13010259
ENSG00000087299	L2HGDH	0.209362	0.849472		4	39	0.102564	-	-	-	T	-	0
ENSG00000243335	KCTD7	0.209823	0.850614		6	39	0.153846	-	-	-	T	-	0
ENSG00000101220	C20orf27	0.209861	0.850614		8	39	0.205128	-	-	-	T	-	0
ENSG00000097007	ABL1	0.210463	0.852616		13	39	0.333333	2.07899	0.0188094	0.0334388		[999,1001]:3	0
ENSG00000130313	PGLS	0.210741	0.852699		3	39	0.0769231	-	-	-	T	-	0
ENSG00000037637	FBXO42	0.210991	0.852699		5	39	0.128205	-	-	-	T	-	0
ENSG00000164051	CCDC51	0.211136	0.852699		3	39	0.0769231	-	-	-	T	-	0
ENSG00000115339	GALNT3	0.210841	0.852699		4	39	0.102564	-	-	-	T	-	0	ESP:TMP_ESP_2_166611485
ENSG00000151694	ADAM17	0.21108	0.852699		6	39	0.153846	-	-	-	T	-	0
ENSG00000136026	CKAP4	0.210754	0.852699		5	39	0.128205	-	-	-	T	-	0
ENSG00000154856	APCDD1	0.211469	0.853602		7	39	0.179487	-	-	-		-	0	COSMIC:COSM180629
ENSG00000152332	UHMK1	0.211782	0.854427		6	39	0.153846	-	-	-	T	-	0
ENSG00000142552	RCN3	0.21191	0.854503		5	39	0.128205	-	-	-	T	-	0
ENSG00000137414	FAM8A1	0.212086	0.854775		3	39	0.0769231	-	-	-	T	-	0
ENSG00000109466	KLHL2	0.212527	0.856111		7	39	0.179487	-	-	-	T	-	0
ENSG00000166261	ZNF202	0.212844	0.856886		5	39	0.128205	-	-	-	T	-	0
ENSG00000130803	ZNF317	0.212966	0.856886		12	39	0.307692	2.14872	0.0158282	0.028349		[24,24]:2	0
ENSG00000123124	WWP1	0.213047	0.856886		12	39	0.307692	-	-	-	T	-	0	dbSNP:rs77490675
ENSG00000077150	NFKB2	0.213605	0.858539		10	39	0.25641	-	-	-	T	-	0
ENSG00000112984	KIF20A	0.213802	0.858539		9	39	0.230769	-	-	-	T	-	0
ENSG00000174718	KIAA1551	0.213896	0.858539		6	39	0.153846	-	-	-		-	0
ENSG00000166348	USP54	0.21378	0.858539		15	39	0.384615	-	-	-		-	0	dbSNP:rs199970103
ENSG00000167524		0.21418	0.859238		9	39	0.230769	-	-	-	T	-	0	dbSNP:rs143442568
ENSG00000188171	ZNF626	0.214447	0.859866		11	39	0.282051	-	-	-		-	0
ENSG00000155090	KLF10	0.214555	0.859866		5	39	0.128205	-	-	-	T	-	0
ENSG00000119203	CPSF3	0.214743	0.860178		11	39	0.282051	-	-	-	T	-	0	COSMIC:COSM122341
ENSG00000162849	KIF26B	0.2154	0.861928		26	39	0.666667	0.736341	0.230762	0.237694		[485,485]:2	0	ESP:TMP_ESP_1_245848889
ENSG00000013523	ANGEL1	0.215335	0.861928		10	39	0.25641	-	-	-		-	0
ENSG00000164114	MAP9	0.215518	0.86196		14	39	0.358974	-	-	-		-	0
ENSG00000185722	ANKFY1	0.21573	0.862369		6	39	0.153846	-	-	-	T	-	0	dbSNP:rs200734276
ENSG00000143624	INTS3	0.215967	0.862879		15	39	0.384615	-	-	-	T	-	0	dbSNP:rs137908170,dbSNP:rs200065863
ENSG00000149016	TUT1	0.216196	0.862942		13	39	0.333333	-	-	-		-	0	dbSNP:rs148017119
ENSG00000158006	PAFAH2	0.216203	0.862942		6	39	0.153846	-	-	-	T	-	0	dbSNP:rs201195566
ENSG00000073417	PDE8A	0.216696	0.864468		10	39	0.25641	-	-	-	T	-	0	dbSNP:rs141141657,dbSNP:rs188281332
ENSG00000146083	RNF44	0.217067	0.865508		8	39	0.205128	-	-	-	T	-	0
ENSG00000185477	GPRIN3	0.217386	0.865646		6	39	0.153846	-	-	-	N	-	0
ENSG00000058673	ZC3H11A	0.217432	0.865646		7	39	0.179487	-	-	-	T	-	0	COSMIC:COSM286630
ENSG00000187961	KLHL17	0.217428	0.865646		10	39	0.25641	-	-	-	T	-	0	ESP:TMP_ESP_1_894671,dbSNP:rs193262350
ENSG00000163938	GNL3	0.217678	0.865915		6	39	0.153846	-	-	-	T	-	0
ENSG00000143870	PDIA6	0.217721	0.865915		8	39	0.205128	-	-	-	T	-	0	dbSNP:rs150615615
ENSG00000162645	GBP2	0.218196	0.866049		14	39	0.358974	-	-	-	T	-	0	dbSNP:rs141756411,dbSNP:rs143254761
ENSG00000120519	SLC10A7	0.21814	0.866049		7	39	0.179487	-	-	-	T	-	0
ENSG00000138658	C4orf21	0.218133	0.866049		12	39	0.307692	-	-	-		-	0	dbSNP:rs201097479
ENSG00000164011	ZNF691	0.218169	0.866049		4	39	0.102564	-	-	-	T	-	0
ENSG00000104824	HNRNPL	0.218623	0.866866		11	39	0.282051	-	-	-	T	-	0
ENSG00000197872	FAM49A	0.218622	0.866866		7	39	0.179487	-	-	-	T	-	0	ESP:TMP_ESP_2_16740833
ENSG00000179344	HLA-DQB1	0.21924	0.86705		2	39	0.0512821	-	-	-	T	-	0
ENSG00000174106	LEMD3	0.218917	0.86705		6	39	0.153846	-	-	-	T	-	0
ENSG00000167733	HSD11B1L	0.219478	0.86705		6	39	0.153846	-	-	-	T	-	0
ENSG00000179295	PTPN11	0.219446	0.86705		7	39	0.179487	-	-	-		-	1
ENSG00000198952	SMG5	0.219554	0.86705		12	39	0.307692	-	-	-	T	-	0
ENSG00000009307	CSDE1	0.219162	0.86705		10	39	0.25641	-	-	-	T	-	0	dbSNP:rs148254828
ENSG00000020181	GPR124	0.219479	0.86705		19	39	0.487179	-	-	-		-	0
ENSG00000136861	CDK5RAP2	0.21897	0.86705		14	39	0.358974	-	-	-		-	0	ESP:TMP_ESP_9_123298738
ENSG00000108883	EFTUD2	0.219897	0.867385		20	39	0.512821	-	-	-		-	0	dbSNP:rs144203374
ENSG00000111300	NAA25	0.21997	0.867385		8	39	0.205128	-	-	-	T	-	0	dbSNP:rs201100555
ENSG00000158856	EPB49	0.219809	0.867385		16	39	0.410256	-	-	-		-	0	dbSNP:rs149964975
ENSG00000116691	MIIP	0.220537	0.867874		8	39	0.205128	-	-	-	T	-	0	dbSNP:rs139363608
ENSG00000178460	MCMDC2	0.220346	0.867874		9	39	0.230769	-	-	-	T	-	0	dbSNP:rs150728017
ENSG00000035862	TIMP2	0.220408	0.867874		10	39	0.25641	-	-	-	T	-	0	ESP:TMP_ESP_17_76867018
ENSG00000157869	RAB28	0.22043	0.867874		6	39	0.153846	-	-	-	T	-	0
ENSG00000162804	SNED1	0.221091	0.868604		16	39	0.410256	-	-	-	N	-	0	ESP:TMP_ESP_2_242007327,dbSNP:rs78018785
[truncated: 25,412 more rows]

## Sheet: Table S9
Supplemental Table S9: Chi-square mutational significance analysis
[truncated: 16,029 more rows]

[truncated: 4 more sheets: Table S10, Table S11, Table S12, Table S13]
